# Supplementary material for: Genome-Wide Detection of Major and Epistatic Effect QTLs for Seed Protein and Oil Content in Soybean Under Multiple Environments Using High-Density Bin Map
Source: MDPI journal article supplement (doi:10.3390/ijms20040979), 2019-02-23
Supplement: s1 [file s1]

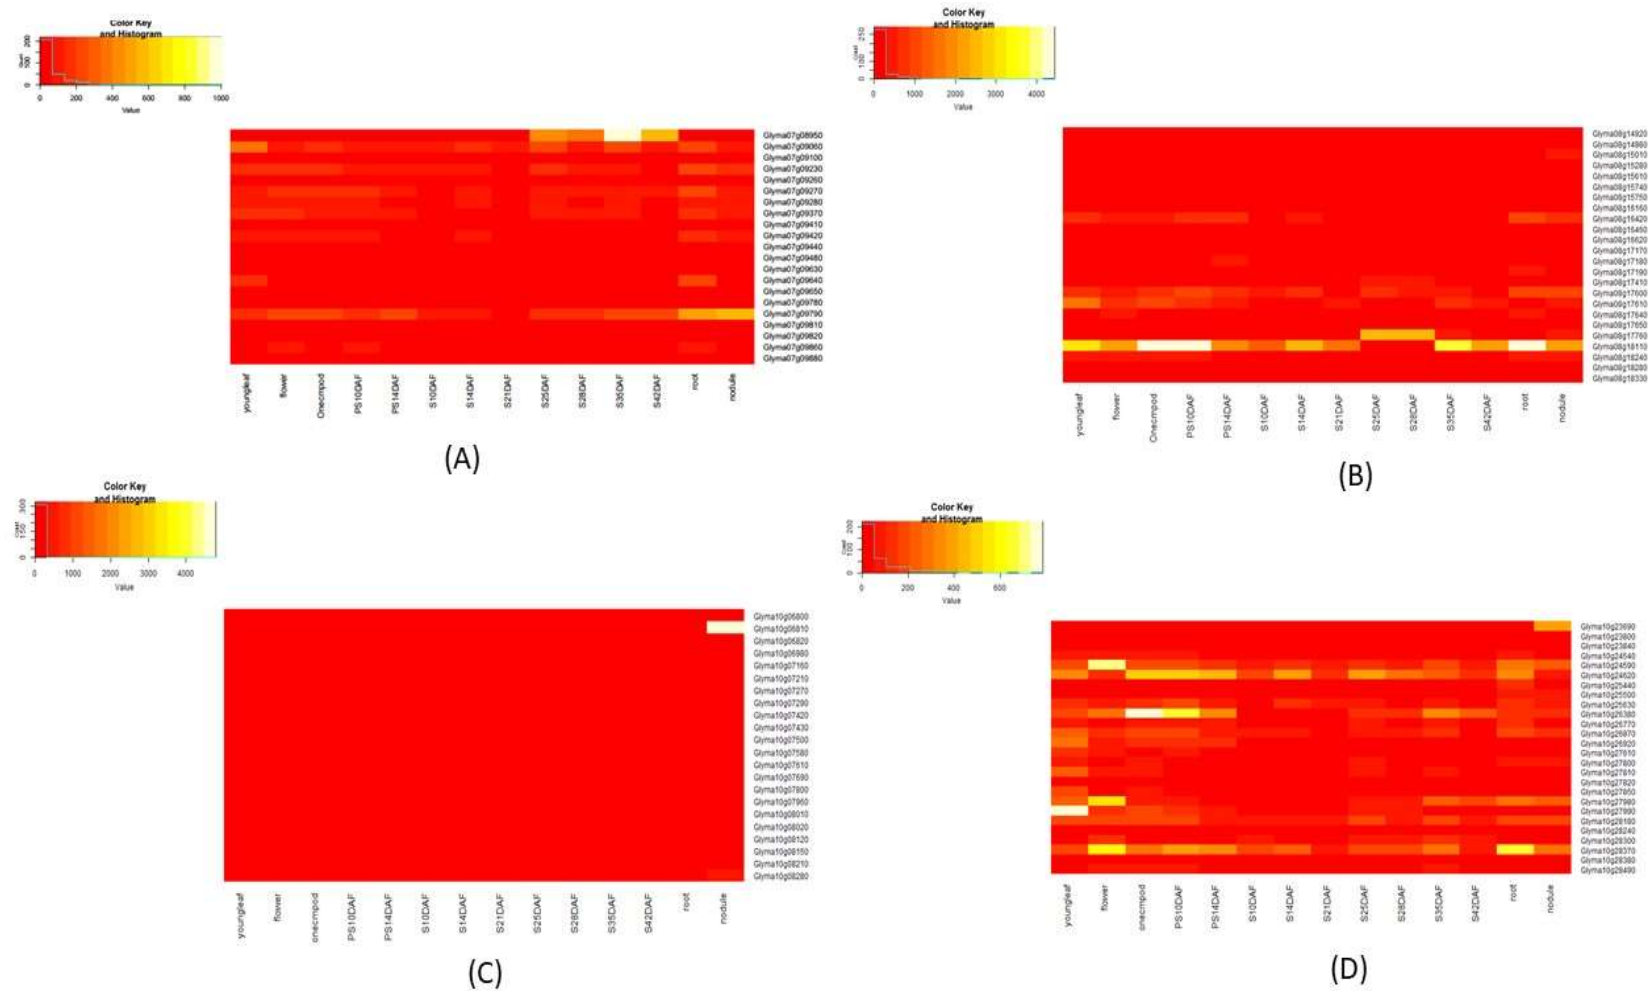

**Figure S1.** Gene expression analysis of predicated candidate genes among the different soybean tissues and development stages from four major and stable QTLs (A) *qPro-7-1*, (B) *qOil-8-3*, (C) *qOil-10-2* and (D) *qOil-10-4*; youngleaf—Young leaf; Onecmpod—1 cm of pod; PS—Pod shell; DAF—Days After flowering; S—Seed.
