# Supplementary material for: Genome-Wide Detection of Major and Epistatic Effect QTLs for Seed Protein and Oil Content in Soybean Under Multiple Environments Using High-Density Bin Map
Source: Int J Mol Sci. 2019 Feb 23;20(4):979. doi: 10.3390/ijms20040979 (PMC6412760; doi:10.3390/ijms20040979)
Supplement: Supplementary file 1 [file ijms-20-00979-s001.zip › Supplementary Tables (S1-S6).xlsx]

## Sheet: Table S1
Supplementary Table S1. Descriptive statistics, broad-sense heritability (h2) and pearson square correlation (r2) of seed protein and oil content evaluated in F2:7:8 –F2:7:11 recombinant inbred lines (RILs) derived from a cross Linhe (♀) and M8206 (♂). The RILs and the parent were grown in different field environments of years and locations.
Environment	Trait	Parent		RIL Population
		Linhe	M8206	N	Mean	Min	Max	CV(%)	Skewness	Kurtosis	h2 (%)	Correlation coefficient
FY2012	Protein	48.1	34.6	102	41.2028	36.57	46.47	2.4	-0.168222	0.849936	88.5	-0.81 (<.001)
	Oil	17.7	22.2		19.8214	18.1	22.15	2.3	0.364889	-0.0640868	88.7
JP2012	Protein	45.4	37.4	101	41.771	38.13	47.8	3	0.649659	0.554202	80.2	-0.57 (<.001)
	Oil	20.6	21.6		20.4149	18.2	22.233	2.9	-0.405493	0.0416765	80.9
JP2013	Protein	49.5	38.5	104	42.2771	38.83	46.83	2.7	0.31398	0.279641	81.9	-0.72 (<.001)
	Oil	17.9	21.9		20.4733	18.533	22.567	2.9	0.206934	-0.190876	79.5
JP2014	Protein	48.3	36.7	104	41.4681	37.77	46.07	2.7	0.254259	0.0175313	84	-0.81 (<.001)
	Oil	19	23.3		21.3242	19.267	23.3	2.6	-0.00039614	-0.0927667	84.5
YC2014	Protein	47.6	34.1	104	41.825	38.63	45.4	2.4	0.139704	1.36746	90.6	-0.66 (<.001)
	Oil	18.4	22.6		20.9419	19.367	22.233	2.1	-0.54944	0.116583	88.4
JP2017	Protein	47.3927	39.2598	104	42.2349	38.1466	45.8254	2.02455	0.168436	0.896502	83.63	-0.79 (<.001)
	Oil	19.0472	23.3251		20.6238	18.559	22.2134	0.423319	-0.441418	0.462519	83.06
Mean	Protein	47.7155	36.76	103	41.7965	38.0128	46.3992	2.53743	0.226303	0.660878	84.805	-0.73 (<.001)
	Oil	18.7745	22.4875		20.5999	18.671	22.4494	2.20389	-0.137487	0.0455082	84.1767
Combined environment broad-sense heritability
h2 (%; protein)	76.4283
h2 (%; oil)	86.7651

## Sheet: Table S2
Supplementary Table S2: Combined analysis of variance (ANOVA) for seed protein and oil content in soybean for six different environments
Combined analysis of variance (ANOVA) for seed protein content in soybean for six different environments
Source	DF	Sum of Squares	Mean Square	F-Value	Pr > F
Environment	5	3596.88	719.375	307.76	<.0001
Block within	12	566	47.1667	20.18	<.0001
Genotype	103	1021.4	9.91648	4.24	<.0001
Genotype x*Environment	514	2932.29	5.70485	2.44	<.0001
Error	1138	2660.05	2.33748	.	.
Combined analysis of variance (ANOVA) for seed oil content in soybean for six different environments
Source	DF	Sum of Squares	Mean Square	F-Value	Pr > F
Environment	5	738.2	147.64	246.31	<.0001
Block within	12	72.9923	6.08269	10.15	<.0001
Genotype	103	466.486	4.52899	7.56	<.0001
Genotype x*Environment	514	902.039	1.75494	2.93	<.0001
Error	1138	682.125	0.599407	.	.

## Sheet: Table S3
Supplementary Table S3: Model genes within qPro-7-1, qOil-8-3, qOil-10-2 and qOil-10-4 regions
Descriptions of columns. Numbers indicated in column headers.
(1) GlymaID from Gmax version 1.1 release. For more information see http://phytozome.jgi.doe.gov/pz/portal.html#!info?alias=Org_Gmax. Only primary proteins were analyzed.
(2) Top Uniref100 BlastP Hit. Match determined via BLASTP of Glyma1.1 primary proteins against Uniref100 (version 11/26/2012). Minimum e-value score E<10-6 required. Percent coverage determined by dividing the top high scoring pair length by predicted protein length.
(3) Top Descriptive Uniref100 Blastp Hit (3). The BLAST report generated above (2) was parsed to eliminate uninformative hits. Hits including the words uncharacterized, putative, related, predicted, orf, expressed or containing Arabidopsis or Rice gene identifiers (AtXgXXXXX, OsXXgXXXXX) were ignored. Minimum e-value score E<10-6 required. Percent coverage determined by dividing the top high scor…
(4) Top TAIR10 Blastp Hit (4). Match determined via BLASTP of Glyma1.1 primary proteins against Arabidopsis thaliana proteins (TAIR10). Minimum e-value score E<10-6 required. Percent coverage determined by dividing the top high scoring pair length by predicted protein length.
(5) Gene Ontology Biological Process. GO Biological Process terms were assigned to each GlymaID using the GO terms associated with the Top TAIR10 Blastp Hit (4). The annotation information was obtained from TAIR v 10.
(6) Gene Ontology Molecular Function. GO Molecular Function terms were assigned to each GlymaID using the GO terms associated with the Top TAIR10 Blastp Hit (4). The annotation information was obtained from TAIR v 10.
(7) Gene Ontology Cellular Component. GO Cellular Component terms were assigned to each GlymaID using the GO terms associated with the Top TAIR10 Blastp Hit (4). The annotation information was obtained from TAIR v 10.
(8) PFAM IDs assigned by Phytozome. For more information see http://phytozome.jgi.doe.gov/pz/portal.html#!info?alias=Org_Gmax.
(9) PANTHER IDs assigned by Phytozome. For more information see http://phytozome.jgi.doe.gov/pz/portal.html#!info?alias=Org_Gmax.
(10) KOG IDs assigned by Phytozome. For more information see http://phytozome.jgi.doe.gov/pz/portal.html#!info?alias=Org_Gmax.
(11) EC IDs assigned by Phytozome. For more information see http://phytozome.jgi.doe.gov/pz/portal.html#!info?alias=Org_Gmax.
(12) KO IDs assigned by Phytozome. For more information see http://phytozome.jgi.doe.gov/pz/portal.html#!info?alias=Org_Gmax.
Glyma 1.1 ID (1)	Protein Length (AA)	Top Uniref100 Blastp Hit (2)	E-value (E<10-6)	% Coverage	Top Descriptive Uniref100 Blastp Hit (3)	E-value (E<10-6)	% Coverage	Top TAIR10 Blastp Hit (4)	E-value (E<10-6)	Coverage	Gene Ontology Biological Process IDs (5)	Gene Ontology Biological Process Descriptions	Gene Ontology Molecular Function IDs (6)	Gene Ontology Molecular Function Descriptions	Gene Ontology Cellular Component IDs (7)	Gene Ontology Cellular Component Descriptions	PFAM IDs (8)	PFAM_Descriptions	Panther IDs (9)	Panther_Descriptions	KOG IDs (10)	KOG_Desctiptions	EC IDs (11)	EC_Descriptions	KO IDs (12)	KO_Descriptions
qPro-7-1
Glyma07g08940	77	UniRef100_UPI0002338363 UPI0002338363 related cluster n=1 Tax=unknown RepID=UPI0002338363	3e-47	100	UniRef100_G7KW54 Acyltransferase-like protein n=1 Tax=Medicago truncatula RepID=G7KW54_MEDTR	9e-12	96.1	NA	NA	NA	NA	NA	NA	NA	NA	NA	NA	NA	NA	NA	NA	NA	NA	NA	NA	NA
Glyma07g08950	397	UniRef100_I1KIK7 Uncharacterized protein n=1 Tax=Glycine max RepID=I1KIK7_SOYBN	0	99.75	UniRef100_O04282 Gibberellin 20-oxidase n=1 Tax=Phaseolus vulgaris RepID=O04282_PHAVU	0	95.21	AT5G51810.1 | Symbols: GA20OX2, AT2353, ATGA20OX2 | gibberellin 20 oxidase 2 | chr5:21055389-21056746 REVERSE LENGTH=378	1e-168	88.92	GO:0009639 GO:0009686 GO:0009739 GO:0009826 GO:0009908 GO:0055114 GO:0080167	response to red or far red light; "gibberellin biosynthetic process"; "response to gibberellin stimulus"; "unidimensional cell growth"; "flower development"; "oxidation-reduction process"; "response to karrikin"	GO:0005506 GO:0016491 GO:0016706 GO:0045544	iron ion binding; "oxidoreductase activity"; "oxidoreductase activity, acting on paired donors, with incorporation or reduction of molecular oxygen, 2-oxoglutarate as one donor, and incorporation of one atom each of oxygen into both donors"; "gibberellin 20-oxidase activity"	GO:0005737	cytoplasm	PF03171	2OG-Fe(II) oxygenase superfamily	PTHR10209 PTHR10209:SF55	FE(II)/ ASCORBATE OXIDASE SUPERFAMILY; "OXIDOREDUCTASE, 2OG-FE(II) OXYGENASE FAMILY PROTEI"	KOG0143	Iron/ascorbate_family_oxidoreductases	NA	NA	NA	NA
Glyma07g08961	335	UniRef100_I1KIK8 Uncharacterized protein (Fragment) n=2 Tax=Glycine max RepID=I1KIK8_SOYBN	0	78.21	UniRef100_E6NU30 JHL05D22.11 protein n=1 Tax=Jatropha curcas RepID=E6NU30_9ROSI	2e-114	95.82	AT2G45630.2 | Symbols: | D-isomer specific 2-hydroxyacid dehydrogenase family protein | chr2:18796000-18797089 FORWARD LENGTH=338	4e-102	86.27	GO:0008152 GO:0055114	metabolic process; "oxidation-reduction process"	GO:0000166 GO:0016616 GO:0048037 GO:0051287	nucleotide binding; "oxidoreductase activity, acting on the CH-OH group of donors, NAD or NADP as acceptor"; "cofactor binding"; "NAD binding"	GO:0005737	cytoplasm	PF02826 PF00389	D-isomer specific 2-hydroxyacid dehydrogenase, NAD binding domain; "D-isomer specific 2-hydroxyacid dehydrogenase, catalytic domain"	PTHR10996 PTHR10996:SF15	2-HYDROXYACID DEHYDROGENASE; "2-HYDROXYACID DEHYDROGENASE-RELATED"	KOG0069	Glyoxylate/hydroxypyruvate_reductase_(D-isomer-specific_2-hydroxy_acid_dehydrogenase_superfamily)	NA	NA	NA	NA
Glyma07g08970	335	UniRef100_I1KIK9 Uncharacterized protein n=1 Tax=Glycine max RepID=I1KIK9_SOYBN	0	99.7	UniRef100_E6NU30 JHL05D22.11 protein n=1 Tax=Jatropha curcas RepID=E6NU30_9ROSI	5e-113	95.82	AT2G45630.2 | Symbols: | D-isomer specific 2-hydroxyacid dehydrogenase family protein | chr2:18796000-18797089 FORWARD LENGTH=338	2e-97	93.73	GO:0008152 GO:0055114	metabolic process; "oxidation-reduction process"	GO:0000166 GO:0016616 GO:0048037 GO:0051287	nucleotide binding; "oxidoreductase activity, acting on the CH-OH group of donors, NAD or NADP as acceptor"; "cofactor binding"; "NAD binding"	GO:0005737	cytoplasm	PF02826 PF00389	D-isomer specific 2-hydroxyacid dehydrogenase, NAD binding domain; "D-isomer specific 2-hydroxyacid dehydrogenase, catalytic domain"	PTHR10996 PTHR10996:SF15	2-HYDROXYACID DEHYDROGENASE; "2-HYDROXYACID DEHYDROGENASE-RELATED"	KOG0069	Glyoxylate/hydroxypyruvate_reductase_(D-isomer-specific_2-hydroxy_acid_dehydrogenase_superfamily)	NA	NA	NA	NA
Glyma07g08985	338	UniRef100_I1KIL0 Uncharacterized protein n=2 Tax=Glycine max RepID=I1KIL0_SOYBN	5e-155	63.31	UniRef100_E6NU30 JHL05D22.11 protein n=1 Tax=Jatropha curcas RepID=E6NU30_9ROSI	7e-128	97.63	AT2G45630.2 | Symbols: | D-isomer specific 2-hydroxyacid dehydrogenase family protein | chr2:18796000-18797089 FORWARD LENGTH=338	2e-115	96.75	GO:0008152 GO:0055114	metabolic process; "oxidation-reduction process"	GO:0000166 GO:0016616 GO:0048037 GO:0051287	nucleotide binding; "oxidoreductase activity, acting on the CH-OH group of donors, NAD or NADP as acceptor"; "cofactor binding"; "NAD binding"	GO:0005737	cytoplasm	PF02826 PF00389	D-isomer specific 2-hydroxyacid dehydrogenase, NAD binding domain; "D-isomer specific 2-hydroxyacid dehydrogenase, catalytic domain"	PTHR10996 PTHR10996:SF15	2-HYDROXYACID DEHYDROGENASE; "2-HYDROXYACID DEHYDROGENASE-RELATED"	KOG0069	Glyoxylate/hydroxypyruvate_reductase_(D-isomer-specific_2-hydroxy_acid_dehydrogenase_superfamily)	NA	NA	NA	NA
Glyma07g09000	337	UniRef100_I1KIL1 Uncharacterized protein n=1 Tax=Glycine max RepID=I1KIL1_SOYBN	0	99.7	UniRef100_B9RDG8 Glycerate dehydrogenase, putative n=1 Tax=Ricinus communis RepID=B9RDG8_RICCO	2e-119	93.77	AT2G45630.2 | Symbols: | D-isomer specific 2-hydroxyacid dehydrogenase family protein | chr2:18796000-18797089 FORWARD LENGTH=338	1e-116	98.52	GO:0008152 GO:0055114	metabolic process; "oxidation-reduction process"	GO:0000166 GO:0016616 GO:0048037 GO:0051287	nucleotide binding; "oxidoreductase activity, acting on the CH-OH group of donors, NAD or NADP as acceptor"; "cofactor binding"; "NAD binding"	GO:0005737	cytoplasm	PF02826 PF00389	D-isomer specific 2-hydroxyacid dehydrogenase, NAD binding domain; "D-isomer specific 2-hydroxyacid dehydrogenase, catalytic domain"	PTHR10996 PTHR10996:SF15	2-HYDROXYACID DEHYDROGENASE; "2-HYDROXYACID DEHYDROGENASE-RELATED"	KOG0069	Glyoxylate/hydroxypyruvate_reductase_(D-isomer-specific_2-hydroxy_acid_dehydrogenase_superfamily)	NA	NA	NA	NA
Glyma07g09011	733	UniRef100_I1JKI3 Uncharacterized protein n=1 Tax=Glycine max RepID=I1JKI3_SOYBN	0	99.86	UniRef100_E6NU32 JHL05D22.13 protein n=1 Tax=Jatropha curcas RepID=E6NU32_9ROSI	0	99.86	AT2G45620.1 | Symbols: | Nucleotidyltransferase family protein | chr2:18792943-18795750 FORWARD LENGTH=764	0	99.73	GO:0000956 GO:0006487 GO:0048573	nuclear-transcribed mRNA catabolic process; "protein N-linked glycosylation"; "photoperiodism, flowering"	GO:0016779	nucleotidyltransferase activity	GO:0005634	nucleus	PF03828 PF01909	Poly(A) polymerase; "Nucleotidyltransferase domain"	PTHR12271 PTHR12271:SF14	POLY(A) POLYMERASE CID (PAP)-RELATED; "POLY(A) POLYMERASE CID (PAP) (CAFFEIN-INDUCED DEATH PROTEIN)"	NA	NA	NA	NA	NA	NA
Glyma07g09020	75	UniRef100_I1KIL3 Uncharacterized protein n=1 Tax=Glycine max RepID=I1KIL3_SOYBN	2e-42	98.67	NA	NA	NA	NA	NA	NA	NA	NA	NA	NA	NA	NA	NA	NA	NA	NA	NA	NA	NA	NA	NA	NA
Glyma07g09030	320	UniRef100_I1KIL4 Uncharacterized protein n=1 Tax=Glycine max RepID=I1KIL4_SOYBN	0	99.69	UniRef100_G7LCQ5 Gibberellin receptor GID1 n=1 Tax=Medicago truncatula RepID=G7LCQ5_MEDTR	0	99.38	AT2G45610.1 | Symbols: | alpha/beta-Hydrolases superfamily protein | chr2:18791463-18792437 FORWARD LENGTH=324	8e-122	98.13	GO:0008152 GO:0009827 GO:0009860	metabolic process; "plant-type cell wall modification"; "pollen tube growth"	GO:0016787	hydrolase activity	GO:0005634	nucleus	PF07859	alpha/beta hydrolase fold	PTHR23024 PTHR23024:SF10	MEMBER OF 'GDXG' FAMILY OF LIPOLYTIC ENZYMES; "CARBOXYLESTERASE-RELATED"	KOG1515	Arylacetamide_deacetylase	NA	NA	NA	NA
Glyma07g09040	335	UniRef100_I1KIL5 Uncharacterized protein n=1 Tax=Glycine max RepID=I1KIL5_SOYBN	0	99.7	UniRef100_G7LCQ8 Gibberellin receptor GID1 n=1 Tax=Medicago truncatula RepID=G7LCQ8_MEDTR	2e-160	96.42	AT2G45600.1 | Symbols: | alpha/beta-Hydrolases superfamily protein | chr2:18789799-18790788 FORWARD LENGTH=329	2e-116	97.91	GO:0008152	metabolic process	GO:0016787	hydrolase activity	GO:0005634	nucleus	PF07859	alpha/beta hydrolase fold	PTHR23024 PTHR23024:SF10	MEMBER OF 'GDXG' FAMILY OF LIPOLYTIC ENZYMES; "CARBOXYLESTERASE-RELATED"	KOG1515	Arylacetamide_deacetylase	NA	NA	NA	NA
Glyma07g09060	634	UniRef100_I1KIL6 Uncharacterized protein n=2 Tax=Glycine max RepID=I1KIL6_SOYBN	0	98.9	UniRef100_G7LCR0 Cysteine-rich receptor-like protein kinase n=1 Tax=Medicago truncatula RepID=G7LCR0_MEDTR	0	96.85	AT2G45590.1 | Symbols: | Protein kinase superfamily protein | chr2:18786725-18788776 FORWARD LENGTH=683	0	99.84	GO:0006468	protein phosphorylation	GO:0004672 GO:0004674 GO:0005524 GO:0016772	protein kinase activity; "protein serine/threonine kinase activity"; "ATP binding"; "transferase activity, transferring phosphorus-containing groups"	GO:0005886	plasma membrane	PF00069	Protein kinase domain	PTHR24420 PTHR24420:SF440	FAMILY NOT NAMED; "SUBFAMILY NOT NAMED"	NA	NA	NA	NA	NA	NA
Glyma07g09070	525	UniRef100_I1KIL7 Uncharacterized protein n=1 Tax=Glycine max RepID=I1KIL7_SOYBN	0	99.81	UniRef100_G7L1E7 Extended synaptotagmin-2-A n=1 Tax=Medicago truncatula RepID=G7L1E7_MEDTR	0	99.62	AT3G61050.2 | Symbols: NTMC2TYPE4, NTMC2T4 | Calcium-dependent lipid-binding (CaLB domain) family protein | chr3:22597485-22600932 FORWARD LENGTH=510	0	99.43	GO:0009414 GO:0009651 GO:0009958 GO:0045892	response to water deprivation; "response to salt stress"; "positive gravitropism"; "negative regulation of transcription, DNA-dependent"	GO:0008289 GO:0043565	lipid binding; "sequence-specific DNA binding"	GO:0005783 GO:0005886 GO:0031965	endoplasmic reticulum; "plasma membrane"; "nuclear membrane"	PF00168	C2 domain	PTHR10774 PTHR10774:SF2	CALCIUM-DEPENDENT LIPID-BINDING PROTEIN (CALB RELATED); "CALCIUM LIPID BINDING PROTEIN"	NA	NA	NA	NA	NA	NA
Glyma07g09090	215	UniRef100_C6TA59 Uncharacterized protein n=1 Tax=Glycine max RepID=C6TA59_SOYBN	2e-156	99.53	UniRef100_G7LCR5 Phosphopantothenoylcysteine decarboxylase n=1 Tax=Medicago truncatula RepID=G7LCR5_MEDTR	7e-137	98.14	AT3G18030.1 | Symbols: ATHAL3A, HAL3A, HAL3, ATHAL3 | HAL3-like protein A | chr3:6167883-6168629 REVERSE LENGTH=209	7e-122	90.7	GO:0015937 GO:0042538	coenzyme A biosynthetic process; "hyperosmotic salinity response"	GO:0003824 GO:0004633 GO:0010181	catalytic activity; "phosphopantothenoylcysteine decarboxylase activity"; "FMN binding"	GO:0005737 GO:0005829	cytoplasm; "cytosol"	PF02441	Flavoprotein	PTHR14359 PTHR14359:SF12	PHOSPHOPENTOTHENOYLCYSTEINE DECARBOXYLASE; "PHOSPHOPENTOTHENOYLCYSTEINE DECARBOXYLASE"	KOG0672	Halotolerance_protein_HAL3_(contains_flavoprotein_domain)	4.1.1.36	Phosphopantothenoylcysteine_decarboxylase	K01598	phosphopantothenoylcysteine_decarboxylase_[EC:4.1.1.36]
Glyma07g09100	252	UniRef100_C6TDE9 Uncharacterized protein n=1 Tax=Glycine max RepID=C6TDE9_SOYBN	6e-180	99.6	UniRef100_B6T986 Testis intracellular mediator protein n=2 Tax=Zea mays RepID=B6T986_MAIZE	4e-76	85.71	AT1G12650.4 | Symbols: | unknown protein; FUNCTIONS IN: molecular_function unknown; INVOLVED IN: biological_process unknown; LOCATED IN: cellular_component unknown; EXPRESSED IN: 23 plant structures; EXPRESSED DURING: 13 growth stages; CONTAINS InterPro DOMAIN/s: Protein of unknown function DUF947 (InterPro:IPR009292); Has 700 Blast hits to 631 proteins in 192 species: Archae - 0; Bacteria - 32; …	2e-71	77.78	GO:0000398 GO:0008150 GO:0051604	mRNA splicing, via spliceosome; "biological process"; "protein maturation"	GO:0003674	molecular function	GO:0005634	nucleus	PF06102	Domain of unknown function (DUF947)	PTHR21738	UNCHARACTERIZED	KOG3190	Uncharacterized_conserved_protein	NA	NA	NA	NA
Glyma07g09110	499	UniRef100_I1KIM3 Uncharacterized protein n=2 Tax=Glycine max RepID=I1KIM3_SOYBN	0	99.8	UniRef100_G7L1D0 Cytochrome P450 n=2 Tax=Medicago truncatula RepID=G7L1D0_MEDTR	0	97.19	AT2G45550.1 | Symbols: CYP76C4 | cytochrome P450, family 76, subfamily C, polypeptide 4 | chr2:18773541-18775654 REVERSE LENGTH=511	9e-177	93.19	GO:0055114	oxidation-reduction process	GO:0005506 GO:0009055 GO:0016705 GO:0019825 GO:0020037	iron ion binding; "electron carrier activity"; "oxidoreductase activity, acting on paired donors, with incorporation or reduction of molecular oxygen"; "oxygen binding"; "heme binding"	NA	NA	PF00067	Cytochrome P450	PTHR24298 PTHR24298:SF44	FAMILY NOT NAMED; ""	KOG0156	Cytochrome_P450_CYP2_subfamily	NA	NA	NA	NA
Glyma07g09131	180	UniRef100_UPI0002338DBA UPI0002338DBA related cluster n=1 Tax=unknown RepID=UPI0002338DBA	3e-117	90	UniRef100_G7L1D4 Neurobeachin-like protein n=1 Tax=Medicago truncatula RepID=G7L1D4_MEDTR	2e-59	70.56	AT2G45540.1 | Symbols: | WD-40 repeat family protein / beige-related | chr2:18757881-18772229 REVERSE LENGTH=2946	6e-54	80	GO:0008150	biological process	GO:0000166	nucleotide binding	GO:0005886	plasma membrane	NA	NA	PTHR13743 PTHR13743:SF58	BEIGE/BEACH-RELATED; ""; ""	NA	NA	NA	NA	NA	NA
Glyma07g09150	510	UniRef100_I1KIM6 Uncharacterized protein n=2 Tax=Glycine max RepID=I1KIM6_SOYBN	0	95.29	UniRef100_G7ZXN0 Cytochrome P450 monooxygenase CYP704G7 n=2 Tax=Medicago truncatula RepID=G7ZXN0_MEDTR	0	91.37	AT2G45510.1 | Symbols: CYP704A2 | cytochrome P450, family 704, subfamily A, polypeptide 2 | chr2:18753085-18754944 FORWARD LENGTH=511	9e-178	94.9	GO:0055114	oxidation-reduction process	GO:0005506 GO:0009055 GO:0016705 GO:0019825 GO:0020037	iron ion binding; "electron carrier activity"; "oxidoreductase activity, acting on paired donors, with incorporation or reduction of molecular oxygen"; "oxygen binding"; "heme binding"	GO:0005783	endoplasmic reticulum	PF00067	Cytochrome P450	PTHR24296	FAMILY NOT NAMED	KOG0157	Cytochrome_P450_CYP4/CYP19/CYP26_subfamilies	NA	NA	NA	NA
Glyma07g09160	511	UniRef100_I1KIM7 Uncharacterized protein n=1 Tax=Glycine max RepID=I1KIM7_SOYBN	0	99.8	UniRef100_G7ZXN0 Cytochrome P450 monooxygenase CYP704G7 n=2 Tax=Medicago truncatula RepID=G7ZXN0_MEDTR	0	98.83	AT2G45510.1 | Symbols: CYP704A2 | cytochrome P450, family 704, subfamily A, polypeptide 2 | chr2:18753085-18754944 FORWARD LENGTH=511	0	96.28	GO:0055114	oxidation-reduction process	GO:0005506 GO:0009055 GO:0016705 GO:0019825 GO:0020037	iron ion binding; "electron carrier activity"; "oxidoreductase activity, acting on paired donors, with incorporation or reduction of molecular oxygen"; "oxygen binding"; "heme binding"	GO:0005783	endoplasmic reticulum	PF00067	Cytochrome P450	PTHR24296	FAMILY NOT NAMED	KOG0157	Cytochrome_P450_CYP4/CYP19/CYP26_subfamilies	NA	NA	NA	NA
Glyma07g09170	468	UniRef100_UPI0002338DBB UPI0002338DBB related cluster n=1 Tax=unknown RepID=UPI0002338DBB	0	99.79	UniRef100_G7ZXN7 Cytochrome P450 n=1 Tax=Medicago truncatula RepID=G7ZXN7_MEDTR	0	99.79	AT2G45510.1 | Symbols: CYP704A2 | cytochrome P450, family 704, subfamily A, polypeptide 2 | chr2:18753085-18754944 FORWARD LENGTH=511	0	96.15	GO:0055114	oxidation-reduction process	GO:0005506 GO:0009055 GO:0016705 GO:0019825 GO:0020037	iron ion binding; "electron carrier activity"; "oxidoreductase activity, acting on paired donors, with incorporation or reduction of molecular oxygen"; "oxygen binding"; "heme binding"	GO:0005783	endoplasmic reticulum	PF00067	Cytochrome P450	PTHR24296	FAMILY NOT NAMED	KOG0157	Cytochrome_P450_CYP4/CYP19/CYP26_subfamilies	NA	NA	NA	NA
Glyma07g09180	335	UniRef100_C6T8R9 Uncharacterized protein n=2 Tax=Glycine max RepID=C6T8R9_SOYBN	0	99.7	UniRef100_B9RKM4 Transcription factor, putative n=1 Tax=Ricinus communis RepID=B9RKM4_RICCO	3e-157	99.7	AT4G29100.1 | Symbols: | basic helix-loop-helix (bHLH) DNA-binding superfamily protein | chr4:14341140-14344575 FORWARD LENGTH=407	7e-100	99.7	GO:0006355	regulation of transcription, DNA-dependent	GO:0003700	sequence-specific DNA binding transcription factor activity	GO:0005634	nucleus	NA	NA	NA	NA	NA	NA	NA	NA	NA	NA
Glyma07g09190	100	NA	NA	NA	NA	NA	NA	NA	NA	NA	NA	NA	NA	NA	NA	NA	NA	NA	NA	NA	NA	NA	NA	NA	NA	NA
Glyma07g09200	335	UniRef100_I1KIN2 Uncharacterized protein n=1 Tax=Glycine max RepID=I1KIN2_SOYBN	0	99.7	UniRef100_G8A0N7 5'-methylthioadenosine/S-adenosylhomocysteine nucleosidase (Fragment) n=1 Tax=Medicago truncatula RepID=G8A0N7_MEDTR	3e-178	95.52	AT4G28940.1 | Symbols: | Phosphorylase superfamily protein | chr4:14274414-14276920 FORWARD LENGTH=348	2e-141	98.51	GO:0009116	nucleoside metabolic process	GO:0003824	catalytic activity	GO:0005886	plasma membrane	PF01048	Phosphorylase superfamily	PTHR21234 PTHR21234:SF10	PURINE NUCLEOSIDE PHOSPHORYLASE; "SUBFAMILY NOT NAMED"	NA	NA	NA	NA	NA	NA
Glyma07g09211	221	UniRef100_UPI0002338DBC UPI0002338DBC related cluster n=1 Tax=unknown RepID=UPI0002338DBC	1e-157	99.55	NA	NA	NA	NA	NA	NA	NA	NA	NA	NA	NA	NA	NA	NA	NA	NA	NA	NA	NA	NA	NA	NA
Glyma07g09220	344	UniRef100_I1KIN3 Uncharacterized protein n=2 Tax=Glycine max RepID=I1KIN3_SOYBN	0	99.71	UniRef100_G8A0N7 5'-methylthioadenosine/S-adenosylhomocysteine nucleosidase (Fragment) n=1 Tax=Medicago truncatula RepID=G8A0N7_MEDTR	2e-175	95.06	AT4G28940.1 | Symbols: | Phosphorylase superfamily protein | chr4:14274414-14276920 FORWARD LENGTH=348	1e-147	99.13	GO:0009116	nucleoside metabolic process	GO:0003824	catalytic activity	GO:0005886	plasma membrane	PF01048	Phosphorylase superfamily	PTHR21234 PTHR21234:SF10	PURINE NUCLEOSIDE PHOSPHORYLASE; "SUBFAMILY NOT NAMED"	NA	NA	NA	NA	NA	NA
Glyma07g09230	207	UniRef100_C6SVA4 Uncharacterized protein n=1 Tax=Glycine max RepID=C6SVA4_SOYBN	3e-149	99.52	UniRef100_G7K102 DNA-directed RNA polymerases I, II, and III subunit RPABC1 n=1 Tax=Medicago truncatula RepID=G7K102_MEDTR	1e-129	99.52	AT3G22320.1 | Symbols: ATRPABC24.3, RPB5A, NRPB5, NRPD5 | Eukaryotic rpb5 RNA polymerase subunit family protein | chr3:7891045-7892094 REVERSE LENGTH=205	1e-119	99.03	GO:0006351 GO:0006626 GO:0051604	transcription, DNA-dependent; "protein targeting to mitochondrion"; "protein maturation"	GO:0003677 GO:0003899	DNA binding; "DNA-directed RNA polymerase activity"	GO:0000418 GO:0005634 GO:0005665	DNA-directed RNA polymerase IV complex; "nucleus"; "DNA-directed RNA polymerase II, core complex"	PF01191 PF03871	RNA polymerase Rpb5, C-terminal domain; "RNA polymerase Rpb5, N-terminal domain"	PTHR10535	DNA-DIRECTED RNA POLYMERASE II	KOG3218	RNA_polymerase,_25-kDa_subunit_(common_to_polymerases_I,_II_and_III)	NA	NA	K03013	DNA-directed_RNA_polymerases_I,_II,_and_III_subunit_RPABC1
Glyma07g09240	163	UniRef100_C6SWE0 Uncharacterized protein n=1 Tax=Glycine max RepID=C6SWE0_SOYBN	3e-112	99.39	UniRef100_B3GV28 Peroxiredoxin n=1 Tax=Pisum sativum RepID=B3GV28_PEA	6e-106	99.39	AT1G65980.1 | Symbols: TPX1 | thioredoxin-dependent peroxidase 1 | chr1:24559524-24560753 REVERSE LENGTH=162	5e-94	99.39	GO:0009407 GO:0046686	toxin catabolic process; "response to cadmium ion"	GO:0016209 GO:0016491	antioxidant activity; "oxidoreductase activity"	GO:0005737 GO:0005829 GO:0005886 GO:0009507 GO:0016020	cytoplasm; "cytosol"; "plasma membrane"; "chloroplast"; "membrane"	PF08534	Redoxin	PTHR10430	PEROXIREDOXIN-5	KOG0541	Alkyl_hydroperoxide_reductase/peroxiredoxin	1.11.1.15	peroxiredoxin	K03386	peroxiredoxin_(alkyl_hydroperoxide_reductase_subunit_C)_[EC:1.11.1.15]
Glyma07g09250	211	UniRef100_I1KIN8 Uncharacterized protein n=1 Tax=Glycine max RepID=I1KIN8_SOYBN	2e-154	99.53	UniRef100_A7UQU4 ROP-like protein n=1 Tax=Medicago truncatula RepID=A7UQU4_MEDTR	8e-145	99.05	AT4G28950.1 | Symbols: ARAC7, ATROP9, ATRAC7, RAC7, ROP9 | RHO-related protein from plants 9 | chr4:14278289-14279705 FORWARD LENGTH=209	1e-138	99.05	GO:0006184 GO:0007015 GO:0007165 GO:0007264 GO:0015031	GTP catabolic process; "actin filament organization"; "signal transduction"; "small GTPase mediated signal transduction"; "protein transport"	GO:0003924 GO:0005525	GTPase activity; "GTP binding"	GO:0005576 GO:0005622 GO:0005886 GO:0016020	extracellular region; "intracellular"; "plasma membrane"; "membrane"	PF00071	Ras family	PTHR24072 PTHR24072:SF352	FAMILY NOT NAMED; ""	KOG0393	Ras-related_small_GTPase,_Rho_type	NA	NA	K07975	Rho_family,_other
Glyma07g09260	466	UniRef100_I1KIN9 Uncharacterized protein n=1 Tax=Glycine max RepID=I1KIN9_SOYBN	0	99.79	UniRef100_Q6T2Z9 CDK-activating kinase n=1 Tax=Glycine max RepID=Q6T2Z9_SOYBN	0	68.03	AT4G28980.1 | Symbols: CDKF;1, CAK1AT | CDK-activating kinase 1AT | chr4:14288471-14290102 FORWARD LENGTH=479	0	99.79	GO:0000079 GO:0000278 GO:0006468 GO:0008152 GO:0010078 GO:0010440 GO:0042023 GO:0045736	regulation of cyclin-dependent protein kinase activity; "mitotic cell cycle"; "protein phosphorylation"; "metabolic process"; "maintenance of root meristem identity"; "stomatal lineage progression"; "DNA endoreduplication"; "negative regulation of cyclin-dependent protein kinase activity"	GO:0004672 GO:0004674 GO:0004713 GO:0005515 GO:0005524 GO:0016301 GO:0016772 GO:0019912	protein kinase activity; "protein serine/threonine kinase activity"; "protein tyrosine kinase activity"; "protein binding"; "ATP binding"; "kinase activity"; "transferase activity, transferring phosphorus-containing groups"; "cyclin-dependent protein kinase activating kinase activity"	GO:0005634 GO:0005737 GO:0005829	nucleus; "cytoplasm"; "cytosol"	PF00069	Protein kinase domain	PTHR24056 PTHR24056:SF88	CELL DIVISION PROTEIN KINASE; ""	KOG0594	Protein_kinase_PCTAIRE_and_related_kinases	NA	NA	NA	NA
Glyma07g09270	562	UniRef100_I1KIP0 Uncharacterized protein n=1 Tax=Glycine max RepID=I1KIP0_SOYBN	0	94.13	UniRef100_G7KPF6 Sugar transporter n=1 Tax=Medicago truncatula RepID=G7KPF6_MEDTR	0	94.13	AT1G67300.1 | Symbols: | Major facilitator superfamily protein | chr1:25193832-25196751 REVERSE LENGTH=493	0	93.06	GO:0006810 GO:0055085	transport; "transmembrane transport"	GO:0005215 GO:0005351 GO:0015144 GO:0022857 GO:0022891	transporter activity; "sugar:hydrogen symporter activity"; "carbohydrate transmembrane transporter activity"; "transmembrane transporter activity"; "substrate-specific transmembrane transporter activity"	GO:0016020 GO:0016021	membrane; "integral to membrane"	PF00083	Sugar (and other) transporter	PTHR24063 PTHR24063:SF84	FAMILY NOT NAMED; "SUBFAMILY NOT NAMED"	KOG0254	Predicted_transporter_(major_facilitator_superfamily)	NA	NA	NA	NA
Glyma07g09280	364	UniRef100_I1KIP3 Uncharacterized protein n=1 Tax=Glycine max RepID=I1KIP3_SOYBN	0	99.73	UniRef100_G7KPF4 Zinc finger Ran-binding domain-containing protein n=1 Tax=Medicago truncatula RepID=G7KPF4_MEDTR	6e-127	88.19	AT4G28990.1 | Symbols: | RNA-binding protein-related | chr4:14291205-14293018 FORWARD LENGTH=347	2e-37	93.68	GO:0008150	biological process	GO:0008270	zinc ion binding	GO:0005622 GO:0005634	intracellular; "nucleus"	PF00641	Zn-finger in Ran binding protein and others	NA	NA	NA	NA	NA	NA	NA	NA
Glyma07g09290	309	UniRef100_I1KIP4 Uncharacterized protein n=1 Tax=Glycine max RepID=I1KIP4_SOYBN	0	99.68	UniRef100_B6TDG9 Harpin-induced protein n=1 Tax=Zea mays RepID=B6TDG9_MAIZE	3e-85	98.71	AT1G45688.1 | Symbols: | unknown protein; FUNCTIONS IN: molecular_function unknown; INVOLVED IN: biological_process unknown; LOCATED IN: plasma membrane; EXPRESSED IN: 22 plant structures; EXPRESSED DURING: 13 growth stages; BEST Arabidopsis thaliana protein match is: unknown protein (TAIR:AT5G42860.1); Has 258 Blast hits to 242 proteins in 39 species: Archae - 0; Bacteria - 11; Metazoa - 10; Fun…	3e-55	98.38	GO:0008150 GO:0048767	biological process; "root hair elongation"	GO:0003674	molecular function	GO:0005886 GO:0009507	plasma membrane; "chloroplast"	PF03168	Late embryogenesis abundant protein	NA	NA	NA	NA	NA	NA	NA	NA
Glyma07g09300	266	UniRef100_C5WLV2 Uncharacterized protein n=1 Tax=Glycine max RepID=C5WLV2_SOYBN	0	99.62	UniRef100_G7L892 Cov1 n=2 Tax=Medicago truncatula RepID=G7L892_MEDTR	4e-149	95.49	AT2G20130.1 | Symbols: LCV1 | like COV 1 | chr2:8690614-8692234 REVERSE LENGTH=256	2e-138	92.86	GO:0008150	biological process	GO:0003674	molecular function	GO:0005634 GO:0005794	nucleus; "Golgi apparatus"	PF04367	Protein of unknown function (DUF502)	NA	NA	NA	NA	NA	NA	NA	NA
Glyma07g09310	284	UniRef100_I1KIP6 Uncharacterized protein n=1 Tax=Glycine max RepID=I1KIP6_SOYBN	0	99.65	UniRef100_G7J611 HAUS augmin-like complex subunit n=1 Tax=Medicago truncatula RepID=G7J611_MEDTR	2e-166	96.83	AT2G41350.1 | Symbols: | unknown protein; BEST Arabidopsis thaliana protein match is: unknown protein (TAIR:AT2G21980.1); Has 188 Blast hits to 188 proteins in 66 species: Archae - 0; Bacteria - 12; Metazoa - 90; Fungi - 15; Plants - 54; Viruses - 0; Other Eukaryotes - 17 (source: NCBI BLink). | chr2:17231565-17233458 FORWARD LENGTH=298	3e-146	99.3	GO:0008150	biological process	GO:0003674	molecular function	GO:0005737 GO:0005819	cytoplasm; "spindle"	NA	NA	NA	NA	NA	NA	NA	NA	NA	NA
Glyma07g09320	836	UniRef100_I1L4J6 Uncharacterized protein n=1 Tax=Glycine max RepID=I1L4J6_SOYBN	0	99.88	NA	NA	NA	AT3G24630.1 | Symbols: | unknown protein; Has 5348 Blast hits to 3182 proteins in 353 species: Archae - 0; Bacteria - 481; Metazoa - 1959; Fungi - 405; Plants - 180; Viruses - 10; Other Eukaryotes - 2313 (source: NCBI BLink). | chr3:8988398-8990737 FORWARD LENGTH=724	2e-28	24.76	GO:0008150	biological process	GO:0003674	molecular function	GO:0005634	nucleus	NA	NA	NA	NA	NA	NA	NA	NA	NA	NA
Glyma07g09330	563	UniRef100_UPI00023384D5 UPI00023384D5 related cluster n=1 Tax=unknown RepID=UPI00023384D5	0	99.82	UniRef100_F6LPV1 RopGEF8 n=1 Tax=Medicago truncatula RepID=F6LPV1_MEDTR	0	99.82	AT3G24620.1 | Symbols: ATROPGEF8, ROPGEF8 | RHO guanyl-nucleotide exchange factor 8 | chr3:8980695-8982793 REVERSE LENGTH=523	0	99.82	GO:0006944 GO:0009827 GO:0009860 GO:0048610 GO:0048868	cellular membrane fusion; "plant-type cell wall modification"; "pollen tube growth"; "cellular process involved in reproduction"; "pollen tube development"	GO:0005085 GO:0005089 GO:0005515 GO:0042802	guanyl-nucleotide exchange factor activity; "Rho guanyl-nucleotide exchange factor activity"; "protein binding"; "identical protein binding"	NA	NA	PF03759	PRONE (Plant-specific Rop nucleotide exchanger)	NA	NA	NA	NA	NA	NA	NA	NA
Glyma07g09345	257	UniRef100_UPI00023384DF UPI00023384DF related cluster n=1 Tax=unknown RepID=UPI00023384DF	0	99.61	UniRef100_B7FL53 Protein ABIL1 n=1 Tax=Medicago truncatula RepID=B7FL53_MEDTR	7e-125	98.83	AT2G46225.3 | Symbols: ABIL1 | ABI-1-like 1 | chr2:18982113-18984074 FORWARD LENGTH=286	1e-24	47.86	GO:0010090 GO:0045010	trichome morphogenesis; "actin nucleation"	GO:0005515	protein binding	GO:0005737 GO:0031209	cytoplasm; "SCAR complex"	NA	NA	NA	NA	NA	NA	NA	NA	NA	NA
Glyma07g09360	37	NA	NA	NA	NA	NA	NA	NA	NA	NA	NA	NA	NA	NA	NA	NA	NA	NA	NA	NA	NA	NA	NA	NA	NA	NA
Glyma07g09370	725	UniRef100_I1KIP9 Uncharacterized protein n=1 Tax=Glycine max RepID=I1KIP9_SOYBN	0	99.86	UniRef100_G7KPD3 Peroxisomal fatty acid beta-oxidation multifunctional protein n=1 Tax=Medicago truncatula RepID=G7KPD3_MEDTR	0	99.86	AT4G29010.1 | Symbols: AIM1 | Enoyl-CoA hydratase/isomerase family | chr4:14297312-14302016 REVERSE LENGTH=721	0	98.48	GO:0006631 GO:0006635 GO:0007275 GO:0008152 GO:0009695 GO:0009845 GO:0009908 GO:0055114	fatty acid metabolic process; "fatty acid beta-oxidation"; "multicellular organismal development"; "metabolic process"; "jasmonic acid biosynthetic process"; "seed germination"; "flower development"; "oxidation-reduction process"	GO:0000166 GO:0003824 GO:0003857 GO:0004300 GO:0016491 GO:0016616 GO:0050662	nucleotide binding; "catalytic activity"; "3-hydroxyacyl-CoA dehydrogenase activity"; "enoyl-CoA hydratase activity"; "oxidoreductase activity"; "oxidoreductase activity, acting on the CH-OH group of donors, NAD or NADP as acceptor"; "coenzyme binding"	GO:0005618 GO:0005737 GO:0005777 GO:0009506 GO:0009507	cell wall; "cytoplasm"; "peroxisome"; "plasmodesma"; "chloroplast"	PF00378 PF00725 PF02737	Enoyl-CoA hydratase/isomerase family; "3-hydroxyacyl-CoA dehydrogenase, C-terminal domain"; "3-hydroxyacyl-CoA dehydrogenase, NAD binding domain"	PTHR23309	3-HYDROXYACYL-COA DEHYROGENASE	KOG1683	Hydroxyacyl-CoA_dehydrogenase/enoyl-CoA_hydratase	4.2.1.17 1.1.1.211 1.1.1.35	Enoyl-CoA_hydratase. Long-chain-3-hydroxyacyl-CoA_dehydrogenase. 3-hydroxyacyl-CoA_dehydrogenase	K10527	enoyl-CoA_hydratase/3-hydroxyacyl-CoA_dehydrogenase_[EC:4.2.1.17_1.1.1.35_1.1.1.211]
Glyma07g09380	560	UniRef100_UPI0002338DBE UPI0002338DBE related cluster n=1 Tax=unknown RepID=UPI0002338DBE	0	99.82	UniRef100_G7KPW4 Lin-54-like protein n=1 Tax=Medicago truncatula RepID=G7KPW4_MEDTR	0	99.29	AT4G29000.1 | Symbols: | Tesmin/TSO1-like CXC domain-containing protein | chr4:14293957-14296602 FORWARD LENGTH=603	0	92.68	GO:0006355	regulation of transcription, DNA-dependent	GO:0003700	sequence-specific DNA binding transcription factor activity	GO:0005634	nucleus	PF03638	Tesmin/TSO1-like CXC domain	PTHR12446 PTHR12446:SF7	TESMIN/TSO1-RELATED; "TSO1-RELATED"	KOG1171	Metallothionein-like_protein	NA	NA	NA	NA
Glyma07g09400	750	UniRef100_UPI0002338DBF UPI0002338DBF related cluster n=1 Tax=unknown RepID=UPI0002338DBF	0	99.87	UniRef100_G7KPW8 tRNA(Ile)-lysidine synthase n=1 Tax=Medicago truncatula RepID=G7KPW8_MEDTR	0	99.07	AT3G24560.2 | Symbols: RSY3 | Adenine nucleotide alpha hydrolases-like superfamily protein | chr3:8963788-8966494 FORWARD LENGTH=660	0	98.8	GO:0008033 GO:0009658 GO:0009793 GO:0010098	tRNA processing; "chloroplast organization"; "embryo development ending in seed dormancy"; "suspensor development"	GO:0000166 GO:0005524 GO:0016879	nucleotide binding; "ATP binding"; "ligase activity, forming carbon-nitrogen bonds"	GO:0005737 GO:0009507	cytoplasm; "chloroplast"	PF01171	PP-loop family	PTHR11807 PTHR11807:SF6	ATPASES OF THE PP SUPERFAMILY-RELATED; "RSY3 (RASPBERRY 3), ATP BINDING / LIGASE, FORMING "	NA	NA	NA	NA	NA	NA
Glyma07g09410	1028	UniRef100_I1KIQ2 Uncharacterized protein n=1 Tax=Glycine max RepID=I1KIQ2_SOYBN	0	99.9	UniRef100_G7KPW9 Membrane-bound transcription factor site-1 protease n=2 Tax=Medicago truncatula RepID=G7KPW9_MEDTR	0	98.74	AT5G19660.1 | Symbols: ATSBT6.1, S1P, ATS1P | SITE-1 protease | chr5:6642118-6646418 REVERSE LENGTH=1038	0	96.11	GO:0006486 GO:0006508 GO:0006629 GO:0006888 GO:0006972 GO:0042538	protein glycosylation; "proteolysis"; "lipid metabolic process"; "ER to Golgi vesicle-mediated transport"; "hyperosmotic response"; "hyperosmotic salinity response"	GO:0004175 GO:0004252	endopeptidase activity; "serine-type endopeptidase activity"	GO:0005576 GO:0005783 GO:0005794	extracellular region; "endoplasmic reticulum"; "Golgi apparatus"	PF00082	Subtilase family	PTHR10795 PTHR10795:SF30	SUBTILISIN/KEXIN-RELATED SERINE PROTEASE; "SUBTILISIN-RELATED"	KOG4266	Subtilisin_kexin_isozyme-1/site_1_protease,_subtilase_superfamily	3.4.21.112	NA	K08653	membrane-bound_transcription_factor_site-1_protease_[EC:3.4.21.112]
Glyma07g09420	672	UniRef100_I1KIQ3 Uncharacterized protein n=1 Tax=Glycine max RepID=I1KIQ3_SOYBN	0	99.85	UniRef100_A1IGC6 PERK1-like protein kinase n=2 Tax=Nicotiana tabacum RepID=A1IGC6_TOBAC	0	77.23	AT3G24550.1 | Symbols: ATPERK1, PERK1 | proline extensin-like receptor kinase 1 | chr3:8960411-8963303 FORWARD LENGTH=652	0	80.51	GO:0006468 GO:0009611 GO:0009620 GO:0046777 GO:0051510 GO:0052541 GO:0052546	protein phosphorylation; "response to wounding"; "response to fungus"; "protein autophosphorylation"; "regulation of unidimensional cell growth"; "plant-type cell wall cellulose metabolic process"; "cell wall pectin metabolic process"	GO:0004672 GO:0004674 GO:0005524 GO:0016772	protein kinase activity; "protein serine/threonine kinase activity"; "ATP binding"; "transferase activity, transferring phosphorus-containing groups"	GO:0005886	plasma membrane	PF07714	Protein tyrosine kinase	PTHR24420 PTHR24420:SF822	FAMILY NOT NAMED; ""	KOG1187	Serine/threonine_protein_kinase	NA	NA	NA	NA
Glyma07g09430	515	UniRef100_I1KIQ4 Uncharacterized protein n=1 Tax=Glycine max RepID=I1KIQ4_SOYBN	0	99.81	UniRef100_G7KPV9 Oxidoreductase n=1 Tax=Medicago truncatula RepID=G7KPV9_MEDTR	0	99.42	AT4G13250.1 | Symbols: NYC1 | NAD(P)-binding Rossmann-fold superfamily protein | chr4:7684417-7686691 REVERSE LENGTH=496	0	86.6	GO:0008152 GO:0010304 GO:0015996	metabolic process; "PSII associated light-harvesting complex II catabolic process"; "chlorophyll catabolic process"	GO:0000166 GO:0005515 GO:0016491 GO:0034256	nucleotide binding; "protein binding"; "oxidoreductase activity"; "chlorophyll(ide) b reductase activity"	GO:0009507	chloroplast	PF00106	short chain dehydrogenase	PTHR24314 PTHR24314:SF37	FAMILY NOT NAMED; ""	KOG0725	Reductases_with_broad_range_of_substrate_specificities	1.1.1.294	NA	K13606	chlorophyll(ide)_b_reductase_[EC:1.1.1.294]
Glyma07g09440	481	UniRef100_I1KIQ6 Uncharacterized protein n=1 Tax=Glycine max RepID=I1KIQ6_SOYBN	0	99.79	UniRef100_G7KPV7 Ankyrin repeat domain-containing protein n=1 Tax=Medicago truncatula RepID=G7KPV7_MEDTR	0	99.38	AT3G24530.1 | Symbols: | AAA-type ATPase family protein / ankyrin repeat family protein | chr3:8945678-8947786 REVERSE LENGTH=481	0	98.34	GO:0019538	protein metabolic process	GO:0000166 GO:0005524 GO:0016887 GO:0017111	nucleotide binding; "ATP binding"; "ATPase activity"; "nucleoside-triphosphatase activity"	GO:0005886 GO:0009507	plasma membrane; "chloroplast"	PF00004 PF00023	ATPase family associated with various cellular activities (AAA); "Ankyrin repeat"	PTHR24198 PTHR24198:SF302	ANKYRIN REPEAT AND PROTEIN KINASE DOMAIN-CONTAININ; ""	KOG4214	Myotrophin_and_similar_proteins	NA	NA	NA	NA
Glyma07g09450	465	UniRef100_I1KIQ7 Uncharacterized protein n=1 Tax=Glycine max RepID=I1KIQ7_SOYBN	0	99.78	UniRef100_UPI0001746B95 hypothetical protein VspiD_24415 n=1 Tax=Verrucomicrobium spinosum DSM 4136 RepID=UPI0001746B95	4e-11	42.8	AT5G19540.1 | Symbols: | unknown protein; FUNCTIONS IN: molecular_function unknown; INVOLVED IN: biological_process unknown; LOCATED IN: chloroplast; EXPRESSED IN: 22 plant structures; EXPRESSED DURING: 13 growth stages; Has 1807 Blast hits to 1807 proteins in 277 species: Archae - 0; Bacteria - 0; Metazoa - 736; Fungi - 347; Plants - 385; Viruses - 0; Other Eukaryotes - 339 (source: NCBI BLink).…	0	93.98	GO:0008150	biological process	GO:0003674	molecular function	GO:0009507	chloroplast	NA	NA	NA	NA	NA	NA	NA	NA	NA	NA
Glyma07g09480	536	UniRef100_I1L4I4 Uncharacterized protein n=1 Tax=Glycine max RepID=I1L4I4_SOYBN	0	99.81	UniRef100_G7KPV5 Myo-inositol transporter n=1 Tax=Medicago truncatula RepID=G7KPV5_MEDTR	0	97.2	AT3G18830.1 | Symbols: ATPLT5, PMT5, ATPMT5 | polyol/monosaccharide transporter 5 | chr3:6489000-6491209 REVERSE LENGTH=539	0	88.43	GO:0006810 GO:0031348 GO:0043090 GO:0055085	transport; "negative regulation of defense response"; "amino acid import"; "transmembrane transport"	GO:0005215 GO:0005351 GO:0005354 GO:0005355 GO:0005365 GO:0015144 GO:0015145 GO:0015148 GO:0015168 GO:0015575 GO:0015576 GO:0015591 GO:0022857 GO:0022891	transporter activity; "sugar:hydrogen symporter activity"; "galactose transmembrane transporter activity"; "hexose phosphate transport"; "myo-inositol transmembrane transporter activity"; "carbohydrate transmembrane transporter activity"; "monosaccharide transmembrane transporter activity"; "D-xylose transmembrane transporter activity"; "glycerol transmembrane transporter activity"; "mannitol tra…	GO:0005886 GO:0016020 GO:0016021	plasma membrane; "membrane"; "integral to membrane"	PF00083	Sugar (and other) transporter	PTHR24063 PTHR24063:SF85	FAMILY NOT NAMED; "SUBFAMILY NOT NAMED"	KOG0254	Predicted_transporter_(major_facilitator_superfamily)	NA	NA	NA	NA
Glyma07g09490	240	UniRef100_I1KIQ9 Uncharacterized protein n=1 Tax=Glycine max RepID=I1KIQ9_SOYBN	4e-175	99.58	UniRef100_G7JJE1 ATP-dependent RNA helicase chl1 n=1 Tax=Medicago truncatula RepID=G7JJE1_MEDTR	8e-17	91.25	AT3G16070.1 | Symbols: | unknown protein; BEST Arabidopsis thaliana protein match is: unknown protein (TAIR:AT1G15260.1); Has 26 Blast hits to 26 proteins in 7 species: Archae - 0; Bacteria - 0; Metazoa - 0; Fungi - 0; Plants - 26; Viruses - 0; Other Eukaryotes - 0 (source: NCBI BLink). | chr3:5451864-5452316 REVERSE LENGTH=150	1e-14	86.67	GO:0008150	biological process	GO:0003674	molecular function	GO:0005575	cellular component	NA	NA	NA	NA	NA	NA	NA	NA	NA	NA
Glyma07g09500	428	UniRef100_I1KIR0 Uncharacterized protein n=1 Tax=Glycine max RepID=I1KIR0_SOYBN	0	99.77	UniRef100_B9RS61 Monooxygenase, putative n=1 Tax=Ricinus communis RepID=B9RS61_RICCO	0	98.6	AT4G13260.1 | Symbols: YUC2 | Flavin-binding monooxygenase family protein | chr4:7721840-7723616 REVERSE LENGTH=415	0	95.56	GO:0009851 GO:0055114	auxin biosynthetic process; "oxidation-reduction process"	GO:0004499 GO:0016491 GO:0050660 GO:0050661	N,N-dimethylaniline monooxygenase activity; "oxidoreductase activity"; "flavin adenine dinucleotide binding"; "NADP binding"	GO:0005634	nucleus	PF00743	Flavin-binding monooxygenase-like	PTHR23023 PTHR23023:SF5	DIMETHYLANILINE MONOOXYGENASE; "MONOOXYGENASE"	KOG1399	Flavin-containing_monooxygenase	1.14.13.-	With_NADH_or_NADPH_as_one_donor,_and_incorporation_of_one_atom	K11816	YUCCA_family_monooxygenase_[EC:1.14.13.-]
Glyma07g09510	91	UniRef100_I1KIR1 Uncharacterized protein n=1 Tax=Glycine max RepID=I1KIR1_SOYBN	3e-57	98.9	UniRef100_G0XQD1 Heat shock factor n=1 Tax=Arabidopsis thaliana RepID=G0XQD1_ARATH	2e-30	72.53	AT3G24520.1 | Symbols: AT-HSFC1, HSFC1 | heat shock transcription factor C1 | chr3:8941455-8942531 FORWARD LENGTH=330	5e-33	72.53	GO:0006355 GO:0009407	regulation of transcription, DNA-dependent; "toxin catabolic process"	GO:0003677 GO:0003700 GO:0043565	DNA binding; "sequence-specific DNA binding transcription factor activity"; "sequence-specific DNA binding"	GO:0005634	nucleus	PF00447	HSF-type DNA-binding	PTHR10015 PTHR10015:SF7	HEAT SHOCK TRANSCRIPTION FACTOR; "HEAT SHOCK TRANSCRIPTION FACTOR"	NA	NA	NA	NA	NA	NA
Glyma07g09520	188	UniRef100_I1KIR2 Uncharacterized protein n=2 Tax=Glycine max RepID=I1KIR2_SOYBN	4e-134	99.47	UniRef100_D9ZJ31 HSF domain class transcription factor n=1 Tax=Malus x domestica RepID=D9ZJ31_MALDO	2e-26	99.47	AT3G24520.1 | Symbols: AT-HSFC1, HSFC1 | heat shock transcription factor C1 | chr3:8941455-8942531 FORWARD LENGTH=330	1e-18	37.23	GO:0006355 GO:0009407	regulation of transcription, DNA-dependent; "toxin catabolic process"	GO:0003677 GO:0003700 GO:0043565	DNA binding; "sequence-specific DNA binding transcription factor activity"; "sequence-specific DNA binding"	GO:0005634	nucleus	NA	NA	PTHR10015 PTHR10015:SF7	HEAT SHOCK TRANSCRIPTION FACTOR; "HEAT SHOCK TRANSCRIPTION FACTOR"	NA	NA	NA	NA	NA	NA
Glyma07g09530	693	UniRef100_UPI00023384CE UPI00023384CE related cluster n=1 Tax=unknown RepID=UPI00023384CE	0	99.86	UniRef100_B9RKR8 Kif4, putative n=1 Tax=Ricinus communis RepID=B9RKR8_RICCO	0	99.57	AT3G16060.1 | Symbols: | ATP binding microtubule motor family protein | chr3:5447503-5451196 FORWARD LENGTH=684	0	98.85	GO:0007018	microtubule-based movement	GO:0003777 GO:0005524	microtubule motor activity; "ATP binding"	GO:0005634 GO:0005739 GO:0005886	nucleus; "mitochondrion"; "plasma membrane"	PF00225	Kinesin motor domain	PTHR24115 PTHR24115:SF79	FAMILY NOT NAMED; "SUBFAMILY NOT NAMED"	KOG4280	Kinesin-like_protein	NA	NA	NA	NA
Glyma07g09540	736	UniRef100_UPI0002338F1C UPI0002338F1C related cluster n=1 Tax=unknown RepID=UPI0002338F1C	0	99.86	UniRef100_G7L8X5 IST1-like protein n=1 Tax=Medicago truncatula RepID=G7L8X5_MEDTR	4e-144	54.08	AT4G32350.1 | Symbols: | Regulator of Vps4 activity in the MVB pathway protein | chr4:15617634-15620642 FORWARD LENGTH=732	1e-66	30.16	GO:0008150	biological process	GO:0003674	molecular function	GO:0005634	nucleus	PF03398	Regulator of Vps4 activity in the MVB pathway	PTHR12161 PTHR12161:SF1	UNCHARACTERIZED DUF292; "gb def: human kiiaa0174 protein like [caenorhabditis elegans]"	NA	NA	NA	NA	NA	NA
Glyma07g09550	231	UniRef100_I1KIR5 Uncharacterized protein n=1 Tax=Glycine max RepID=I1KIR5_SOYBN	5e-77	99.57	NA	NA	NA	NA	NA	NA	NA	NA	NA	NA	NA	NA	NA	NA	NA	NA	NA	NA	NA	NA	NA	NA
Glyma07g09560	112	UniRef100_I1KIR6 Uncharacterized protein n=1 Tax=Glycine max RepID=I1KIR6_SOYBN	2e-76	99.11	UniRef100_Q8MQG6 Protein W02D3.12 n=1 Tax=Caenorhabditis elegans RepID=Q8MQG6_CAEEL	9e-13	78.57	AT5G67490.1 | Symbols: | unknown protein; CONTAINS InterPro DOMAIN/s: Protein of unknown function DUF1674 (InterPro:IPR012875); Has 30201 Blast hits to 17322 proteins in 780 species: Archae - 12; Bacteria - 1396; Metazoa - 17338; Fungi - 3422; Plants - 5037; Viruses - 0; Other Eukaryotes - 2996 (source: NCBI BLink). | chr5:26934368-26934694 REVERSE LENGTH=108	7e-14	27.68	GO:0008150	biological process	GO:0003674	molecular function	NA	NA	PF07896	Protein of unknown function (DUF1674)	NA	NA	KOG3245	Uncharacterized_conserved_protein	NA	NA	NA	NA
Glyma07g09570	81	UniRef100_I1KIR7 Uncharacterized protein n=1 Tax=Glycine max RepID=I1KIR7_SOYBN	3e-50	98.77	NA	NA	NA	NA	NA	NA	NA	NA	NA	NA	NA	NA	NA	NA	NA	NA	NA	NA	NA	NA	NA	NA
Glyma07g09581	164	UniRef100_I1L4H4 Uncharacterized protein n=1 Tax=Glycine max RepID=I1L4H4_SOYBN	2e-89	92.07	UniRef100_Q10EQ8 Expressed protein n=1 Tax=Oryza sativa Japonica Group RepID=Q10EQ8_ORYSJ	3e-44	93.29	AT4G13270.1 | Symbols: | Late embryogenesis abundant (LEA) hydroxyproline-rich glycoprotein family | chr4:7731280-7732902 FORWARD LENGTH=215	2e-57	91.46	GO:0000902 GO:0008150 GO:0016049 GO:0048193	cell morphogenesis; "biological process"; "cell growth"; "Golgi vesicle transport"	GO:0003674	molecular function	GO:0005634	nucleus	PF03168	Late embryogenesis abundant protein	NA	NA	NA	NA	NA	NA	NA	NA
Glyma07g09590	77	UniRef100_I1KIR9 Uncharacterized protein n=1 Tax=Glycine max RepID=I1KIR9_SOYBN	2e-47	98.7	NA	NA	NA	NA	NA	NA	NA	NA	NA	NA	NA	NA	NA	NA	NA	NA	NA	NA	NA	NA	NA	NA
Glyma07g09600	64	UniRef100_I1KIS0 Uncharacterized protein n=1 Tax=Glycine max RepID=I1KIS0_SOYBN	1e-35	98.44	UniRef100_G7KNJ1 Arabinogalactan peptide n=1 Tax=Medicago truncatula RepID=G7KNJ1_MEDTR	5e-19	98.44	AT5G53250.1 | Symbols: AGP22, ATAGP22 | arabinogalactan protein 22 | chr5:21603715-21604007 FORWARD LENGTH=63	5e-15	89.06	GO:0006826 GO:0010054 GO:0010106 GO:0010167 GO:0015706 GO:0016132	iron ion transport; "trichoblast differentiation"; "cellular response to iron ion starvation"; "response to nitrate"; "nitrate transport"; "brassinosteroid biosynthetic process"	NA	NA	GO:0005886 GO:0031225	plasma membrane; "anchored to membrane"	PF06376	Protein of unknown function (DUF1070)	NA	NA	NA	NA	NA	NA	NA	NA
Glyma07g09620	108	UniRef100_I1KIS1 Uncharacterized protein n=1 Tax=Glycine max RepID=I1KIS1_SOYBN	4e-73	99.07	UniRef100_Q8RUI1 Expressed protein n=1 Tax=Arabidopsis thaliana RepID=Q8RUI1_ARATH	8e-07	41.67	NA	NA	NA	NA	NA	NA	NA	NA	NA	NA	NA	NA	NA	NA	NA	NA	NA	NA	NA
Glyma07g09630	502	UniRef100_I1KIS2 Uncharacterized protein n=1 Tax=Glycine max RepID=I1KIS2_SOYBN	0	99.8	UniRef100_G7KNI6 Cytosolic aldehyde dehydrogenase n=1 Tax=Medicago truncatula RepID=G7KNI6_MEDTR	0	99.8	AT3G24503.1 | Symbols: ALDH2C4, ALDH1A, REF1 | aldehyde dehydrogenase 2C4 | chr3:8919732-8923029 REVERSE LENGTH=501	0	97.41	GO:0008152 GO:0009627 GO:0009699 GO:0010167 GO:0015706 GO:0034976 GO:0055114	metabolic process; "systemic acquired resistance"; "phenylpropanoid biosynthetic process"; "response to nitrate"; "nitrate transport"; "response to endoplasmic reticulum stress"; "oxidation-reduction process"	GO:0004028 GO:0004029 GO:0016491 GO:0050269	3-chloroallyl aldehyde dehydrogenase activity; "aldehyde dehydrogenase (NAD) activity"; "oxidoreductase activity"; "coniferyl-aldehyde dehydrogenase activity"	GO:0005737	cytoplasm	PF00171	Aldehyde dehydrogenase family	PTHR11699 PTHR11699:SF46	ALDEHYDE DEHYDROGENASE-RELATED; "SUCCINATE-SEMIALDEHYDE DEHYDROGENASE-RELATED"	KOG2450	Aldehyde_dehydrogenase	NA	NA	NA	NA
Glyma07g09640	502	UniRef100_I1KIS3 Uncharacterized protein n=1 Tax=Glycine max RepID=I1KIS3_SOYBN	0	99.8	UniRef100_G7KNI3 Aldehyde dehydrogenase n=1 Tax=Medicago truncatula RepID=G7KNI3_MEDTR	0	99	AT3G24503.1 | Symbols: ALDH2C4, ALDH1A, REF1 | aldehyde dehydrogenase 2C4 | chr3:8919732-8923029 REVERSE LENGTH=501	0	99.2	GO:0008152 GO:0009627 GO:0009699 GO:0010167 GO:0015706 GO:0034976 GO:0055114	metabolic process; "systemic acquired resistance"; "phenylpropanoid biosynthetic process"; "response to nitrate"; "nitrate transport"; "response to endoplasmic reticulum stress"; "oxidation-reduction process"	GO:0004028 GO:0004029 GO:0016491 GO:0050269	3-chloroallyl aldehyde dehydrogenase activity; "aldehyde dehydrogenase (NAD) activity"; "oxidoreductase activity"; "coniferyl-aldehyde dehydrogenase activity"	GO:0005737	cytoplasm	PF00171	Aldehyde dehydrogenase family	PTHR11699 PTHR11699:SF46	ALDEHYDE DEHYDROGENASE-RELATED; "SUCCINATE-SEMIALDEHYDE DEHYDROGENASE-RELATED"	KOG2450	Aldehyde_dehydrogenase	1.2.1.68	NA	K12355	coniferyl-aldehyde_dehydrogenase_[EC:1.2.1.68]
Glyma07g09650	128	UniRef100_I1L4G9 Uncharacterized protein n=1 Tax=Glycine max RepID=I1L4G9_SOYBN	8e-74	100	UniRef100_G7L8Y5 Aldehyde dehydrogenase n=1 Tax=Medicago truncatula RepID=G7L8Y5_MEDTR	8e-63	99.22	AT3G24503.1 | Symbols: ALDH2C4, ALDH1A, REF1 | aldehyde dehydrogenase 2C4 | chr3:8919732-8923029 REVERSE LENGTH=501	7e-54	98.44	GO:0008152 GO:0009627 GO:0009699 GO:0010167 GO:0015706 GO:0034976 GO:0055114	metabolic process; "systemic acquired resistance"; "phenylpropanoid biosynthetic process"; "response to nitrate"; "nitrate transport"; "response to endoplasmic reticulum stress"; "oxidation-reduction process"	GO:0004028 GO:0004029 GO:0016491 GO:0050269	3-chloroallyl aldehyde dehydrogenase activity; "aldehyde dehydrogenase (NAD) activity"; "oxidoreductase activity"; "coniferyl-aldehyde dehydrogenase activity"	GO:0005737	cytoplasm	PF00171	Aldehyde dehydrogenase family	PTHR11699 PTHR11699:SF46	ALDEHYDE DEHYDROGENASE-RELATED; "SUCCINATE-SEMIALDEHYDE DEHYDROGENASE-RELATED"	NA	NA	NA	NA	NA	NA
Glyma07g09660	1080	UniRef100_UPI0002338F1F UPI0002338F1F related cluster n=1 Tax=unknown RepID=UPI0002338F1F	0	99.91	UniRef100_G7KNH7 DNA mismatch repair protein Msh6-2 n=1 Tax=Medicago truncatula RepID=G7KNH7_MEDTR	0	99.81	AT3G24495.1 | Symbols: MSH7, MSH6-2, ATMSH7 | MUTS homolog 7 | chr3:8912418-8918086 REVERSE LENGTH=1109	0	96.2	GO:0000710 GO:0000911 GO:0006200 GO:0006260 GO:0006270 GO:0006275 GO:0006298 GO:0006306 GO:0007067 GO:0007126 GO:0007129 GO:0007131 GO:0008283 GO:0009411 GO:0009909 GO:0010389 GO:0010564 GO:0016458 GO:0034968 GO:0043570 GO:0045910 GO:0051322 GO:0051567 GO:0051726	meiotic mismatch repair; "cytokinesis by cell plate formation"; "ATP catabolic process"; "DNA replication"; "DNA replication initiation"; "regulation of DNA replication"; "mismatch repair"; "DNA methylation"; "mitosis"; "meiosis"; "synapsis"; "reciprocal meiotic recombination"; "cell proliferation"; "response to UV"; "regulation of flower development"; "regulation of G2/M transition of mitotic ce…	GO:0000400 GO:0003684 GO:0005515 GO:0005524 GO:0008094 GO:0032137 GO:0032138	four-way junction DNA binding; "damaged DNA binding"; "protein binding"; "ATP binding"; "DNA-dependent ATPase activity"; "guanine/thymine mispair binding"; "single base insertion or deletion binding"	GO:0000228 GO:0005634 GO:0032301	nuclear chromosome; "nucleus"; "MutSalpha complex"	PF01624 PF00488 PF05192 PF05188	MutS domain I; "MutS domain V"; "MutS domain III"; "MutS domain II"	PTHR11361 PTHR11361:SF31	DNA MISMATCH REPAIR MUTS RELATED PROTEINS; "MUTS HOMOLOG 6, MSH6"	NA	NA	NA	NA	NA	NA
Glyma07g09670	914	UniRef100_I1L4G7 Uncharacterized protein n=2 Tax=Glycine max RepID=I1L4G7_SOYBN	0	66.52	UniRef100_G7KNH6 Pattern formation protein EMB30 n=1 Tax=Medicago truncatula RepID=G7KNH6_MEDTR	0	67.07	AT5G19610.1 | Symbols: GNL2 | GNOM-like 2 | chr5:6617746-6622045 REVERSE LENGTH=1375	0	66.96	GO:0009827 GO:0009846 GO:0009860 GO:0032012 GO:0050790	plant-type cell wall modification; "pollen germination"; "pollen tube growth"; "regulation of ARF protein signal transduction"; "regulation of catalytic activity"	GO:0005086	ARF guanyl-nucleotide exchange factor activity	GO:0005622 GO:0005737 GO:0090406	intracellular; "cytoplasm"; "pollen tube"	PF01369	Sec7 domain	PTHR24689 PTHR24689:SF19	FAMILY NOT NAMED; ""	KOG0928	Pattern-formation_protein/guanine_nucleotide_exchange_factor	NA	NA	NA	NA
Glyma07g09690	361	UniRef100_I1KIS6 Uncharacterized protein n=1 Tax=Glycine max RepID=I1KIS6_SOYBN	0	99.72	UniRef100_Q9LV59 Alcohol dehydrogenase transcription factor myb/SANT-like protein n=2 Tax=Arabidopsis thaliana RepID=Q9LV59_ARATH	1e-90	98.34	AT3G24490.1 | Symbols: | Alcohol dehydrogenase transcription factor Myb/SANT-like family protein | chr3:8911022-8912023 FORWARD LENGTH=333	3e-93	98.34	GO:0006355 GO:0043687 GO:0045893	regulation of transcription, DNA-dependent; "post-translational protein modification"; "positive regulation of transcription, DNA-dependent"	GO:0003700	sequence-specific DNA binding transcription factor activity	GO:0005634	nucleus	PF10545	Alcohol dehydrogenase transcription factor Myb/SANT-like	NA	NA	KOG4282	Transcription_factor_GT-2_and_related_proteins,_contains_trihelix_DNA-binding/SANT_domain	NA	NA	NA	NA
Glyma07g09700	153	UniRef100_I1KIS7 Uncharacterized protein n=1 Tax=Glycine max RepID=I1KIS7_SOYBN	2e-82	99.35	NA	NA	NA	NA	NA	NA	NA	NA	NA	NA	NA	NA	PF07172	Glycine rich protein family	NA	NA	NA	NA	NA	NA	NA	NA
Glyma07g09705	128	UniRef100_UPI0002338F21 UPI0002338F21 related cluster n=1 Tax=unknown RepID=UPI0002338F21	5e-26	80.47	UniRef100_B9R9P7 40S ribosomal protein S20, putative n=1 Tax=Ricinus communis RepID=B9R9P7_RICCO	1e-18	79.69	AT5G62300.2 | Symbols: | Ribosomal protein S10p/S20e family protein | chr5:25021388-25022235 REVERSE LENGTH=124	2e-19	70.31	GO:0006412	translation	GO:0003723 GO:0003735	RNA binding; "structural constituent of ribosome"	GO:0005618 GO:0005622 GO:0005840 GO:0009507 GO:0015935 GO:0022627	cell wall; "intracellular"; "ribosome"; "chloroplast"; "small ribosomal subunit"; "cytosolic small ribosomal subunit"	PF00338	Ribosomal protein S10p/S20e; ""	PTHR11700 PTHR11700:SF3	30S RIBOSOMAL PROTEIN S10 FAMILY MEMBER; "30S RIBOSOMAL PROTEIN S10P"; ""	NA	NA	NA	NA	NA	NA
Glyma07g09710	622	UniRef100_I1L4G2 Uncharacterized protein n=2 Tax=Glycine max RepID=I1L4G2_SOYBN	0	99.84	UniRef100_Q0P7I2 Sst1 protein n=1 Tax=Lotus japonicus RepID=Q0P7I2_LOTJA	0	97.43	AT5G19600.1 | Symbols: SULTR3;5 | sulfate transporter 3;5 | chr5:6613113-6616891 REVERSE LENGTH=634	0	97.11	GO:0006810 GO:0008272 GO:0055085	transport; "sulfate transport"; "transmembrane transport"	GO:0005215 GO:0008271 GO:0015116	transporter activity; "secondary active sulfate transmembrane transporter activity"; "sulfate transmembrane transporter activity"	GO:0009507 GO:0016020 GO:0016021	chloroplast; "membrane"; "integral to membrane"	PF00916 PF01740	Sulfate transporter family; "STAS domain"	PTHR11814 PTHR11814:SF46	SULFATE TRANSPORTER; "SUBFAMILY NOT NAMED"	KOG0236	Sulfate/bicarbonate/oxalate_exchanger_SAT-1_and_related_transporters_(SLC26_family)	NA	NA	NA	NA
Glyma07g09730	489	UniRef100_I1KIT0 Uncharacterized protein n=1 Tax=Glycine max RepID=I1KIT0_SOYBN	0	98.57	UniRef100_Q9LHF1 Leucine-rich repeat extensin-like protein 4 n=1 Tax=Arabidopsis thaliana RepID=LRX4_ARATH	0	77.1	AT3G24480.1 | Symbols: | Leucine-rich repeat (LRR) family protein | chr3:8901154-8902638 REVERSE LENGTH=494	0	80.16	NA	NA	GO:0005199	structural constituent of cell wall	GO:0005576 GO:0005618 GO:0009505 GO:0009506	extracellular region; "cell wall"; "plant-type cell wall"; "plasmodesma"	NA	NA	PTHR24420 PTHR24420:SF665	FAMILY NOT NAMED; ""	NA	NA	NA	NA	NA	NA
Glyma07g09740	402	UniRef100_I1KIT1 Uncharacterized protein n=1 Tax=Glycine max RepID=I1KIT1_SOYBN	0	99.75	UniRef100_G7KNG0 Serine incorporator n=1 Tax=Medicago truncatula RepID=G7KNG0_MEDTR	0	99.75	AT3G24460.1 | Symbols: | Serinc-domain containing serine and sphingolipid biosynthesis protein | chr3:8886160-8889717 REVERSE LENGTH=409	0	99.75	NA	NA	NA	NA	GO:0016020	membrane	PF03348	Serine incorporator (Serinc)	PTHR10383 PTHR10383:SF2	TUMOR DIFFERENTIALLY EXPRESSED PROTEIN-RELATED; "UNCHARACTERIZED"	KOG2592	Tumor_differentially_expressed_(TDE)_protein	NA	NA	NA	NA
Glyma07g09751	682	UniRef100_UPI0002339154 UPI0002339154 related cluster n=1 Tax=unknown RepID=UPI0002339154	0	99.85	UniRef100_G7KNF9 Arf-GAP domain and FG repeats-containing protein n=1 Tax=Medicago truncatula RepID=G7KNF9_MEDTR	0	99.85	AT4G13350.2 | Symbols: NIG | NSP (nuclear shuttle protein)-interacting GTPase | chr4:7770170-7773321 REVERSE LENGTH=602	1e-180	99.85	GO:0006913 GO:0009615 GO:0032312	nucleocytoplasmic transport; "response to virus"; "regulation of ARF GTPase activity"	GO:0003924 GO:0005525 GO:0008060 GO:0008270	GTPase activity; "GTP binding"; "ARF GTPase activator activity"; "zinc ion binding"	GO:0005737 GO:0005829	cytoplasm; "cytosol"	PF01412	Putative GTPase activating protein for Arf	PTHR23180 PTHR23180:SF87	CENTAURIN/ARF; "SUBFAMILY NOT NAMED"	KOG0702	Predicted_GTPase-activating_protein	NA	NA	NA	NA
Glyma07g09760	136	UniRef100_I1KIT4 Uncharacterized protein n=1 Tax=Glycine max RepID=I1KIT4_SOYBN	3e-93	99.26	UniRef100_B9RPB5 Chloroplast-targeted copper chaperone, putative n=1 Tax=Ricinus communis RepID=B9RPB5_RICCO	7e-61	94.85	AT3G24450.1 | Symbols: | Heavy metal transport/detoxification superfamily protein | chr3:8880286-8881611 REVERSE LENGTH=140	1e-42	94.85	GO:0006825 GO:0030001	copper ion transport; "metal ion transport"	GO:0005507 GO:0046872	copper ion binding; "metal ion binding"	NA	NA	PF00403	Heavy-metal-associated domain	PTHR22814 PTHR22814:SF53	COPPER TRANSPORT PROTEIN ATOX1-RELATED; "SUBFAMILY NOT NAMED"	KOG1603	Copper_chaperone	NA	NA	NA	NA
Glyma07g09770	147	UniRef100_I1KHD7 Uncharacterized protein n=1 Tax=Glycine max RepID=I1KHD7_SOYBN	2e-15	25.17	UniRef100_Q84RS0 ZR4 protein (Fragment) n=1 Tax=Medicago sativa RepID=Q84RS0_MEDSA	5e-15	55.1	AT5G19420.1 | Symbols: | Regulator of chromosome condensation (RCC1) family with FYVE zinc finger domain | chr5:6547945-6552866 REVERSE LENGTH=1105	2e-14	39.46	GO:0000956	nuclear-transcribed mRNA catabolic process	GO:0003682 GO:0005543 GO:0008270 GO:0008536 GO:0046872	chromatin binding; "phospholipid binding"; "zinc ion binding"; "Ran GTPase binding"; "metal ion binding"	GO:0005737	cytoplasm	NA	NA	NA	NA	NA	NA	NA	NA	NA	NA
Glyma07g09780	85	UniRef100_I1JF15 Uncharacterized protein n=2 Tax=Glycine max RepID=I1JF15_SOYBN	1e-41	80	UniRef100_A3BDK9 cDNA clone:J013102L13, full insert sequence n=2 Tax=Oryza sativa RepID=A3BDK9_ORYSJ	2e-16	77.65	AT3G18510.1 | Symbols: | unknown protein; Has 15 Blast hits to 15 proteins in 9 species: Archae - 0; Bacteria - 0; Metazoa - 0; Fungi - 0; Plants - 15; Viruses - 0; Other Eukaryotes - 0 (source: NCBI BLink). | chr3:6355711-6355984 FORWARD LENGTH=67	3e-17	76.47	GO:0008150 GO:0009220	biological process; "pyrimidine ribonucleotide biosynthetic process"	GO:0003674	molecular function	GO:0005575	cellular component	NA	NA	NA	NA	NA	NA	NA	NA	NA	NA
Glyma07g09790	157	UniRef100_I1KIT8 Uncharacterized protein n=1 Tax=Glycine max RepID=I1KIT8_SOYBN	9e-111	99.36	NA	NA	NA	AT5G19590.1 | Symbols: | Protein of unknown function, DUF538 | chr5:6611614-6612069 REVERSE LENGTH=151	3e-61	86.62	GO:0006635 GO:0008150 GO:0016558	fatty acid beta-oxidation; "biological process"; "protein import into peroxisome matrix"	GO:0003674	molecular function	GO:0009507	chloroplast	PF04398	Protein of unknown function, DUF538	NA	NA	NA	NA	NA	NA	NA	NA
Glyma07g09800	720	UniRef100_I1KIT9 Uncharacterized protein n=1 Tax=Glycine max RepID=I1KIT9_SOYBN	0	99.86	UniRef100_H6VVZ3 VRN5-like protein n=1 Tax=Aquilegia coerulea RepID=H6VVZ3_AQUCA	0	98.47	AT3G24440.1 | Symbols: VRN5, VIL1 | Fibronectin type III domain-containing protein | chr3:8876207-8878171 REVERSE LENGTH=602	2e-179	81.53	GO:0000085 GO:0006306 GO:0006342 GO:0009640 GO:0009793 GO:0009845 GO:0009909 GO:0009933 GO:0010048 GO:0010162 GO:0010182 GO:0010228 GO:0010388 GO:0016567 GO:0016568 GO:0016571 GO:0016572 GO:0016579 GO:0019915 GO:0031047 GO:0045893 GO:0050826 GO:0051567	G2 phase of mitotic cell cycle; "DNA methylation"; "chromatin silencing"; "photomorphogenesis"; "embryo development ending in seed dormancy"; "seed germination"; "regulation of flower development"; "meristem structural organization"; "vernalization response"; "seed dormancy process"; "sugar mediated signaling pathway"; "vegetative to reproductive phase transition of meristem"; "cullin deneddylati…	GO:0003674	molecular function	GO:0005634	nucleus	PF00041 PF07227	Fibronectin type III domain; "Protein of unknown function (DUF1423)"	PTHR21736 PTHR21736:SF17	VERNALIZATION-INSENSITIVE PROTEIN 3; "SUBFAMILY NOT NAMED"	NA	NA	NA	NA	NA	NA
Glyma07g09810	729	UniRef100_I1L4F5 Uncharacterized protein (Fragment) n=2 Tax=Glycine max RepID=I1L4F5_SOYBN	0	98.9	UniRef100_G7JJW0 Anthranilate phosphoribosyltransferase-like protein n=1 Tax=Medicago truncatula RepID=G7JJW0_MEDTR	0	99.86	AT3G57880.1 | Symbols: | Calcium-dependent lipid-binding (CaLB domain) plant phosphoribosyltransferase family protein | chr3:21431198-21433519 REVERSE LENGTH=773	0	98.9	GO:0000162	tryptophan biosynthetic process	GO:0003674	molecular function	GO:0005618 GO:0005739 GO:0005783 GO:0009506	cell wall; "mitochondrion"; "endoplasmic reticulum"; "plasmodesma"	PF00168 PF08372	C2 domain; "Plant phosphoribosyltransferase C-terminal"	PTHR10024 PTHR10024:SF97	SYNAPTOTAGMIN; "C2 DOMAIN-CONTAINING PROTEIN"	NA	NA	NA	NA	NA	NA
Glyma07g09820	534	UniRef100_I1KIU2 Uncharacterized protein n=1 Tax=Glycine max RepID=I1KIU2_SOYBN	0	99.81	UniRef100_G7KNK7 Mrp-like protein n=2 Tax=Medicago truncatula RepID=G7KNK7_MEDTR	0	98.5	AT3G24430.1 | Symbols: HCF101 | ATP binding | chr3:8868731-8872154 REVERSE LENGTH=532	0	96.63	GO:0000023 GO:0006098 GO:0006364 GO:0009902 GO:0010027 GO:0015979 GO:0015995 GO:0016117 GO:0016226 GO:0019252 GO:0019288 GO:0034660 GO:0043085	maltose metabolic process; "pentose-phosphate shunt"; "rRNA processing"; "chloroplast relocation"; "thylakoid membrane organization"; "photosynthesis"; "chlorophyll biosynthetic process"; "carotenoid biosynthetic process"; "iron-sulfur cluster assembly"; "starch biosynthetic process"; "isopentenyl diphosphate biosynthetic process, mevalonate-independent pathway"; "ncRNA metabolic process"; "posit…	GO:0005524	ATP binding	GO:0009507 GO:0009570	chloroplast; "chloroplast stroma"	PF07015 PF10609 PF01883 PF06155	VirC1 protein; "ParA/MinD ATPase like"; "Domain of unknown function DUF59"; "Protein of unknown function (DUF971)"	PTHR23264 PTHR23264:SF3	NUCLEOTIDE-BINDING PROTEIN NBP35(YEAST)-RELATED; "PUTATIVE PSI STABILISING PROTEIN"	KOG3022	Predicted_ATPase,_nucleotide-binding	NA	NA	NA	NA
Glyma07g09840	279	UniRef100_I1KIU3 Uncharacterized protein n=1 Tax=Glycine max RepID=I1KIU3_SOYBN	0	99.64	UniRef100_G7KNK3 Sigma factor sigB regulation protein rsbQ n=1 Tax=Medicago truncatula RepID=G7KNK3_MEDTR	1e-158	99.64	AT3G24420.1 | Symbols: | alpha/beta-Hydrolases superfamily protein | chr3:8863111-8864883 REVERSE LENGTH=273	6e-102	93.55	GO:0008150	biological process	GO:0016787	hydrolase activity	GO:0005737	cytoplasm	PF00561	alpha/beta hydrolase fold	PTHR10992 PTHR10992:SF13	ALPHA/BETA HYDROLASE RELATED; "BIPHENYL HYDROLASE-RELATED"	KOG1454	Predicted_hydrolase/acyltransferase_(alpha/beta_hydrolase_superfamily)	NA	NA	NA	NA
Glyma07g09850	344	UniRef100_I1KIU4 Uncharacterized protein (Fragment) n=1 Tax=Glycine max RepID=I1KIU4_SOYBN	0	99.71	UniRef100_G7KNJ9 Nudix hydrolase n=1 Tax=Medicago truncatula RepID=G7KNJ9_MEDTR	2e-105	92.15	AT5G19460.1 | Symbols: atnudt20, NUDT20 | nudix hydrolase homolog 20 | chr5:6563112-6565178 FORWARD LENGTH=374	1e-84	94.48	NA	NA	GO:0016787	hydrolase activity	GO:0009507	chloroplast	NA	NA	PTHR13622 PTHR13622:SF2	THIAMIN PYROPHOSPHOKINASE; "THIAMIN PYROPHOSPHOKINASE-RELATED"	NA	NA	NA	NA	NA	NA
Glyma07g09860	702	UniRef100_I1KIU5 Uncharacterized protein n=1 Tax=Glycine max RepID=I1KIU5_SOYBN	0	99.86	UniRef100_G7L902 Lipase n=1 Tax=Medicago truncatula RepID=G7L902_MEDTR	0	99.72	AT1G73920.1 | Symbols: | alpha/beta-Hydrolases superfamily protein | chr1:27791194-27794698 FORWARD LENGTH=704	0	97.15	GO:0006114 GO:0006629	glycerol biosynthetic process; "lipid metabolic process"	GO:0016298	lipase activity	GO:0005576	extracellular region	PF04083	ab-hydrolase associated lipase region	PTHR11005	LYSOSOMAL ACID LIPASE-RELATED	KOG2624	Triglyceride_lipase-cholesterol_esterase	NA	NA	NA	NA
Glyma07g09880	161	UniRef100_I1KIU6 Uncharacterized protein n=1 Tax=Glycine max RepID=I1KIU6_SOYBN	3e-114	99.38	UniRef100_Q9SX29 ATP-dependent Clp protease adaptor protein ClpS n=1 Tax=Arabidopsis thaliana RepID=Q9SX29_ARATH	1e-78	99.38	AT1G68660.1 | Symbols: | Ribosomal protein L12/ ATP-dependent Clp protease adaptor protein ClpS family protein | chr1:25778058-25779083 REVERSE LENGTH=159	2e-81	99.38	GO:0030163	protein catabolic process	GO:0003674	molecular function	NA	NA	PF02617	ATP-dependent Clp protease adaptor protein ClpS	NA	NA	NA	NA	NA	NA	K06891	ATP-dependent_Clp_protease_adaptor_protein_ClpS
Glyma07g09890	691	UniRef100_I1KIU7 Uncharacterized protein n=1 Tax=Glycine max RepID=I1KIU7_SOYBN	0	99.86	UniRef100_G7L912 Protein CASP n=1 Tax=Medicago truncatula RepID=G7L912_MEDTR	0	99.71	AT3G18480.1 | Symbols: AtCASP, CASP | CCAAT-displacement protein alternatively spliced product | chr3:6336924-6341596 FORWARD LENGTH=689	0	99.71	GO:0006891 GO:0030244 GO:0048193	intra-Golgi vesicle-mediated transport; "cellulose biosynthetic process"; "Golgi vesicle transport"	NA	NA	GO:0005622 GO:0005768 GO:0005794 GO:0005802 GO:0016021	intracellular; "endosome"; "Golgi apparatus"; "trans-Golgi network"; "integral to membrane"	PF08172	CASP C terminal	PTHR14043 PTHR14043:SF2	CUT-LIKE 1 (CTL1); "CUT"	KOG0963	Transcription_factor/CCAAT_displacement_protein_CDP1	NA	NA	K09313	homeobox_protein_cut-like
Glyma07g09900	504	UniRef100_I1KIV0 Uncharacterized protein n=1 Tax=Glycine max RepID=I1KIV0_SOYBN	0	99.8	UniRef100_Q8W228 Cytochrome P450 n=1 Tax=Pyrus communis RepID=Q8W228_PYRCO	0	98.02	AT3G26330.1 | Symbols: CYP71B37 | cytochrome P450, family 71, subfamily B, polypeptide 37 | chr3:9646873-9648536 REVERSE LENGTH=500	7e-132	92.26	GO:0055114	oxidation-reduction process	GO:0005506 GO:0009055 GO:0016705 GO:0019825 GO:0020037	iron ion binding; "electron carrier activity"; "oxidoreductase activity, acting on paired donors, with incorporation or reduction of molecular oxygen"; "oxygen binding"; "heme binding"	GO:0005576	extracellular region	PF00067	Cytochrome P450	PTHR24298 PTHR24298:SF44	FAMILY NOT NAMED; ""	KOG0156	Cytochrome_P450_CYP2_subfamily	NA	NA	NA	NA
Glyma07g09960	511	UniRef100_I1KIV1 Uncharacterized protein n=1 Tax=Glycine max RepID=I1KIV1_SOYBN	0	99.8	UniRef100_G7KE79 Cytochrome P450 n=1 Tax=Medicago truncatula RepID=G7KE79_MEDTR	0	98.43	AT3G26300.1 | Symbols: CYP71B34 | cytochrome P450, family 71, subfamily B, polypeptide 34 | chr3:9639199-9640866 REVERSE LENGTH=500	1e-126	95.89	GO:0055114	oxidation-reduction process	GO:0005506 GO:0009055 GO:0016705 GO:0019825 GO:0020037	iron ion binding; "electron carrier activity"; "oxidoreductase activity, acting on paired donors, with incorporation or reduction of molecular oxygen"; "oxygen binding"; "heme binding"	NA	NA	PF00067	Cytochrome P450	PTHR24298 PTHR24298:SF44	FAMILY NOT NAMED; ""	KOG0156	Cytochrome_P450_CYP2_subfamily	NA	NA	NA	NA
Glyma07g09970	510	UniRef100_UPI0002338F26 UPI0002338F26 related cluster n=1 Tax=unknown RepID=UPI0002338F26	0	99.8	UniRef100_Q8W228 Cytochrome P450 n=1 Tax=Pyrus communis RepID=Q8W228_PYRCO	0	99.22	AT3G48310.1 | Symbols: CYP71A22 | cytochrome P450, family 71, subfamily A, polypeptide 22 | chr3:17888192-17889749 FORWARD LENGTH=490	2e-122	94.12	GO:0055114	oxidation-reduction process	GO:0005506 GO:0009055 GO:0016705 GO:0019825 GO:0020037	iron ion binding; "electron carrier activity"; "oxidoreductase activity, acting on paired donors, with incorporation or reduction of molecular oxygen"; "oxygen binding"; "heme binding"	GO:0005575	cellular component	PF00067	Cytochrome P450	PTHR24298 PTHR24298:SF44	FAMILY NOT NAMED; ""	KOG0156	Cytochrome_P450_CYP2_subfamily	NA	NA	NA	NA
Glyma07g09980	575	UniRef100_UPI0002338F27 UPI0002338F27 related cluster n=1 Tax=unknown RepID=UPI0002338F27	0	99.83	UniRef100_D7KDZ8 Aspartyl protease family protein n=1 Tax=Arabidopsis lyrata subsp. lyrata RepID=D7KDZ8_ARALL	0	97.39	AT1G49050.1 | Symbols: | Eukaryotic aspartyl protease family protein | chr1:18150638-18153186 FORWARD LENGTH=583	0	96.35	GO:0006499 GO:0006508	N-terminal protein myristoylation; "proteolysis"	GO:0004190	aspartic-type endopeptidase activity	GO:0005576	extracellular region	PF00026	Eukaryotic aspartyl protease	PTHR13683 PTHR13683:SF98	ASPARTYL PROTEASES; "CHLOROPLAST NUCLEIOD DNA-BINDING-RELATED"	KOG1339	Aspartyl_protease	NA	NA	NA	NA
Glyma07g09990	735	UniRef100_UPI0002338F27 UPI0002338F27 related cluster n=1 Tax=unknown RepID=UPI0002338F27	0	97.41	UniRef100_B9SUY7 Flavin-containing amine oxidase domain-containing protein, putative n=1 Tax=Ricinus communis RepID=B9SUY7_RICCO	0	97.55	AT1G62830.1 | Symbols: LDL1, SWP1, ATSWP1, ATLSD1, LSD1 | LSD1-like 1 | chr1:23264638-23267172 REVERSE LENGTH=844	0	89.25	GO:0016575 GO:0048364 GO:0051568 GO:0055114	histone deacetylation; "root development"; "histone H3-K4 methylation"; "oxidation-reduction process"	GO:0008131 GO:0016491	primary amine oxidase activity; "oxidoreductase activity"	GO:0005634	nucleus	PF01946 PF04433 PF01593	Thi4 family; "SWIRM domain"; "Flavin containing amine oxidoreductase"	PTHR10742 PTHR10742:SF30	AMINE OXIDASE; "AMINE OXIDASE"	KOG0029	Amine_oxidase	NA	NA	NA	NA
Glyma07g10000	588	UniRef100_I1KIV5 Uncharacterized protein n=1 Tax=Glycine max RepID=I1KIV5_SOYBN	0	99.83	UniRef100_Q9FVD6 Ser/Thr specific protein phosphatase 2A A regulatory subunit beta isoform n=1 Tax=Medicago sativa subsp. x varia RepID=Q9FVD6_MEDSV	0	99.83	AT3G25800.1 | Symbols: PDF1, PR 65, PP2AA2 | protein phosphatase 2A subunit A2 | chr3:9422822-9425783 REVERSE LENGTH=587	0	99.83	GO:0000902 GO:0016049 GO:0042325 GO:0046686 GO:0048193	cell morphogenesis; "cell growth"; "regulation of phosphorylation"; "response to cadmium ion"; "Golgi vesicle transport"	GO:0008601	protein phosphatase type 2A regulator activity	GO:0005829 GO:0005886	cytosol; "plasma membrane"	PF02985	HEAT repeat	PTHR10648 PTHR10648:SF4	SERINE/THREONINE PROTEIN PHOSPHATASE 2A REGULATORY SUBUNIT A; "SERINE/THREONINE-PROTEIN PHOSPHATASE PP2A 65 KDA R"	KOG0211	Protein_phosphatase_2A_regulatory_subunit_A_and_related_proteins	NA	NA	K03456	protein_phosphatase_2_(formerly_2A),_regulatory_subunit_A
Glyma07g10010	597	UniRef100_UPI0002338F28 UPI0002338F28 related cluster n=1 Tax=unknown RepID=UPI0002338F28	0	99.66	UniRef100_G7L918 Aluminum activated malate transporter n=1 Tax=Medicago truncatula RepID=G7L918_MEDTR	0	97.82	AT3G18440.1 | Symbols: AtALMT9, ALMT9 | aluminum-activated malate transporter 9 | chr3:6328181-6330652 FORWARD LENGTH=598	0	94.64	GO:0010044 GO:0015743	response to aluminum ion; "malate transport"	GO:0005253	anion channel activity	GO:0009705	plant-type vacuole membrane	PF11744	Aluminium activated malate transporter	NA	NA	KOG4711	Predicted_membrane_protein	NA	NA	NA	NA
Glyma07g10030	244	UniRef100_Q42447 Maturation protein n=1 Tax=Glycine max RepID=Q42447_SOYBN	3e-164	99.59	UniRef100_Q42447 Maturation protein n=1 Tax=Glycine max RepID=Q42447_SOYBN	3e-164	99.59	NA	NA	NA	NA	NA	NA	NA	NA	NA	NA	NA	NA	NA	NA	NA	NA	NA	NA	NA
Glyma07g10040	108	UniRef100_UPI0002338FE4 UPI0002338FE4 related cluster n=1 Tax=unknown RepID=UPI0002338FE4	3e-69	99.07	UniRef100_Q69N34 Agenet domain-containing protein / bromo-adjacent homology (BAH) domain-containing protein-like n=1 Tax=Oryza sativa Japonica Group RepID=Q69N34_ORYSJ	4e-19	59.26	AT3G25855.1 | Symbols: | Copper transport protein family | chr3:9459608-9460267 REVERSE LENGTH=112	1e-24	95.37	NA	NA	NA	NA	GO:0005634	nucleus	NA	NA	PTHR22814 PTHR22814:SF58	COPPER TRANSPORT PROTEIN ATOX1-RELATED; "OS09G0408500 PROTEIN"	KOG1603	Copper_chaperone	NA	NA	NA	NA
Glyma07g10051	195	UniRef100_I1KIV8 Uncharacterized protein (Fragment) n=1 Tax=Glycine max RepID=I1KIV8_SOYBN	7e-54	74.87	UniRef100_Q9C9B1 Bifunctional inhibitor/lipid-transfer protein/seed storage 2S albumin-like protein n=1 Tax=Arabidopsis thaliana RepID=Q9C9B1_ARATH	8e-22	64.62	AT1G73890.1 | Symbols: | Bifunctional inhibitor/lipid-transfer protein/seed storage 2S albumin superfamily protein | chr1:27787903-27788658 REVERSE LENGTH=193	2e-24	64.62	GO:0006869	lipid transport	GO:0008289	lipid binding	GO:0005886 GO:0031225	plasma membrane; "anchored to membrane"	PF00234	Protease inhibitor/seed storage/LTP family	NA	NA	NA	NA	NA	NA	NA	NA
Glyma07g10060	196	UniRef100_I1KIV9 Uncharacterized protein n=1 Tax=Glycine max RepID=I1KIV9_SOYBN	2e-141	99.49	UniRef100_Q53RJ7 Expressed protein n=3 Tax=Oryza sativa RepID=Q53RJ7_ORYSJ	3e-10	86.22	NA	NA	NA	NA	NA	NA	NA	NA	NA	NA	NA	NA	NA	NA	NA	NA	NA	NA	NA
Glyma07g10070	274	UniRef100_C6SZD6 Uncharacterized protein n=1 Tax=Glycine max RepID=C6SZD6_SOYBN	1e-143	77.01	NA	NA	NA	AT1G13360.1 | Symbols: | unknown protein; BEST Arabidopsis thaliana protein match is: unknown protein (TAIR:AT3G25870.1); Has 69 Blast hits to 69 proteins in 16 species: Archae - 0; Bacteria - 0; Metazoa - 6; Fungi - 0; Plants - 63; Viruses - 0; Other Eukaryotes - 0 (source: NCBI BLink). | chr1:4577229-4577813 REVERSE LENGTH=194	2e-25	65.33	GO:0008150	biological process	GO:0003674	molecular function	GO:0005634	nucleus	NA	NA	NA	NA	NA	NA	NA	NA	NA	NA
Glyma07g10080	110	UniRef100_I1KIW1 Uncharacterized protein n=1 Tax=Glycine max RepID=I1KIW1_SOYBN	9e-69	99.09	NA	NA	NA	NA	NA	NA	NA	NA	NA	NA	NA	NA	NA	NA	NA	NA	NA	NA	NA	NA	NA	NA
Glyma07g10090	416	UniRef100_I1KIW2 Uncharacterized protein n=1 Tax=Glycine max RepID=I1KIW2_SOYBN	0	99.76	UniRef100_G7JWC0 Translation initiation factor eIF-2B subunit beta n=1 Tax=Medicago truncatula RepID=G7JWC0_MEDTR	0	99.76	AT3G07300.2 | Symbols: | NagB/RpiA/CoA transferase-like superfamily protein | chr3:2324967-2327380 REVERSE LENGTH=407	0	97.84	GO:0006413 GO:0006446 GO:0044237 GO:0050790	translational initiation; "regulation of translational initiation"; "cellular metabolic process"; "regulation of catalytic activity"	GO:0003743 GO:0005085 GO:0005525	translation initiation factor activity; "guanyl-nucleotide exchange factor activity"; "GTP binding"	GO:0005634 GO:0005851	nucleus; "eukaryotic translation initiation factor 2B complex"	PF01008	Initiation factor 2 subunit family	PTHR10233 PTHR10233:SF9	TRANSLATION INITIATION FACTOR EIF-2B; "TRANSLATION INITIATION FACTOR EIF-2B BETA SUBUNIT"	KOG1465	Translation_initiation_factor_2B,_beta_subunit_(eIF-2Bbeta/GCD7)	NA	NA	K03754	translation_initiation_factor_eIF-2B_beta_subunit
Glyma07g10100	310	UniRef100_C6TGA0 Uncharacterized protein n=1 Tax=Glycine max RepID=C6TGA0_SOYBN	0	99.68	UniRef100_B9SAI5 Syntaxin-81, putative n=1 Tax=Ricinus communis RepID=B9SAI5_RICCO	1e-159	99.68	AT1G51740.1 | Symbols: SYP81, ATUFE1, ATSYP81, UFE1 | syntaxin of plants 81 | chr1:19189063-19191188 FORWARD LENGTH=310	4e-144	99.68	GO:0000226 GO:0016192 GO:0051322	microtubule cytoskeleton organization; "vesicle-mediated transport"; "anaphase"	NA	NA	GO:0005634 GO:0016020	nucleus; "membrane"	PF10496	SNARE-complex protein Syntaxin-18 N-terminus	PTHR15959	SYNTAXIN-18	KOG3894	SNARE_protein_Syntaxin_18/UFE1	NA	NA	K08492	syntaxin_18
Glyma07g10116	314	UniRef100_I1KIW4 Uncharacterized protein (Fragment) n=1 Tax=Glycine max RepID=I1KIW4_SOYBN	3e-154	69.43	UniRef100_B9N085 AP2/ERF domain-containing transcription factor n=1 Tax=Populus trichocarpa RepID=B9N085_POPTR	1e-28	93.31	AT1G68550.2 | Symbols: | Integrase-type DNA-binding superfamily protein | chr1:25725810-25726784 REVERSE LENGTH=324	2e-23	45.86	GO:0006355	regulation of transcription, DNA-dependent	GO:0003677 GO:0003700	DNA binding; "sequence-specific DNA binding transcription factor activity"	GO:0005634	nucleus	PF00847	AP2 domain	NA	NA	NA	NA	NA	NA	NA	NA
Glyma07g10133	121	UniRef100_I1KIW5 Uncharacterized protein (Fragment) n=1 Tax=Glycine max RepID=I1KIW5_SOYBN	7e-83	99.17	UniRef100_D7KRN3 Endonuclease/exonuclease/phosphatase family protein n=1 Tax=Arabidopsis lyrata subsp. lyrata RepID=D7KRN3_ARALL	4e-50	88.43	AT1G73875.1 | Symbols: | DNAse I-like superfamily protein | chr1:27781112-27784571 FORWARD LENGTH=454	4e-51	90.91	GO:0008150	biological process	GO:0003674	molecular function	GO:0005634	nucleus	NA	NA	PTHR12121 PTHR12121:SF9	CARBON CATABOLITE REPRESSOR PROTEIN 4; "CARBON CATABOLITE REPRESSOR PROTEIN 4-RELATED"	NA	NA	NA	NA	NA	NA
Glyma07g10150	63	NA	NA	NA	NA	NA	NA	NA	NA	NA	NA	NA	NA	NA	NA	NA	NA	NA	NA	NA	NA	NA	NA	NA	NA	NA
Glyma07g10161	428	UniRef100_I1KIW7 Uncharacterized protein n=1 Tax=Glycine max RepID=I1KIW7_SOYBN	0	99.77	UniRef100_D0EP06 CONSTANS-like zinc finger protein n=1 Tax=Glycine max RepID=D0EP06_SOYBN	3e-133	98.83	AT1G25440.1 | Symbols: | B-box type zinc finger protein with CCT domain | chr1:8933939-8935284 REVERSE LENGTH=417	6e-84	95.56	GO:0006355	regulation of transcription, DNA-dependent	GO:0003700 GO:0008270	sequence-specific DNA binding transcription factor activity; "zinc ion binding"	GO:0005622 GO:0005634 GO:0016020	intracellular; "nucleus"; "membrane"	PF00643 PF06203	B-box zinc finger; "CCT motif"	NA	NA	KOG1601	GATA-4/5/6_transcription_factors	NA	NA	NA	NA
Glyma07g10170	149	UniRef100_I1KIW8 Uncharacterized protein n=1 Tax=Glycine max RepID=I1KIW8_SOYBN	6e-107	99.33	UniRef100_B9T595 NADH-ubiquinone oxidoreductase 12 kDa subunit, mitochondrial, putative n=1 Tax=Ricinus communis RepID=B9T595_RICCO	3e-57	65.1	AT3G18410.2 | Symbols: | Complex I subunit NDUFS6 | chr3:6323203-6323761 FORWARD LENGTH=106	3e-55	65.1	GO:0009853	photorespiration	GO:0003674	molecular function	GO:0005739 GO:0005747 GO:0031966 GO:0045271	mitochondrion; "mitochondrial respiratory chain complex I"; "mitochondrial membrane"; "respiratory chain complex I"	PF10249	NADH-ubiquinone oxidoreductase subunit 10	NA	NA	KOG4009	NADH-ubiquinone_oxidoreductase,_subunit_NDUFB10/PDSW	1.6.5.3 1.6.99.3	NADH_dehydrogenase_(ubiquinone). NADH_dehydrogenase	K03966	NADH_dehydrogenase_(ubiquinone)_1_beta_subcomplex_10_[EC:1.6.5.3_1.6.99.3]
Glyma07g10180	233	UniRef100_I1KIX1 Uncharacterized protein n=1 Tax=Glycine max RepID=I1KIX1_SOYBN	3e-168	99.57	UniRef100_B9T596 LOB domain-containing protein, putative n=1 Tax=Ricinus communis RepID=B9T596_RICCO	5e-65	96.57	AT3G02550.1 | Symbols: LBD41 | LOB domain-containing protein 41 | chr3:536747-537650 REVERSE LENGTH=263	1e-57	99.14	GO:0001666 GO:0006355 GO:0009862 GO:0010310	response to hypoxia; "regulation of transcription, DNA-dependent"; "systemic acquired resistance, salicylic acid mediated signaling pathway"; "regulation of hydrogen peroxide metabolic process"	NA	NA	GO:0005634	nucleus	PF03195	Protein of unknown function DUF260	NA	NA	NA	NA	NA	NA	NA	NA
Glyma07g10210	35	NA	NA	NA	NA	NA	NA	NA	NA	NA	NA	NA	NA	NA	NA	NA	NA	NA	NA	NA	NA	NA	NA	NA	NA	NA
Glyma07g10220	163	UniRef100_C6T3Z8 Uncharacterized protein n=1 Tax=Glycine max RepID=C6T3Z8_SOYBN	3e-114	99.39	UniRef100_D7M813 AT5g16110 n=1 Tax=Arabidopsis lyrata subsp. lyrata RepID=D7M813_ARALL	2e-34	99.39	AT5G16110.1 | Symbols: | unknown protein; FUNCTIONS IN: molecular_function unknown; INVOLVED IN: biological_process unknown; LOCATED IN: chloroplast; EXPRESSED IN: 24 plant structures; EXPRESSED DURING: 15 growth stages; BEST Arabidopsis thaliana protein match is: unknown protein (TAIR:AT3G02555.1); Has 133 Blast hits to 133 proteins in 18 species: Archae - 0; Bacteria - 0; Metazoa - 0; Fungi - 0…	2e-36	99.39	GO:0008150	biological process	GO:0003674	molecular function	NA	NA	NA	NA	NA	NA	NA	NA	NA	NA	NA	NA
Glyma07g10231	593	UniRef100_UPI0002338F2A UPI0002338F2A related cluster n=1 Tax=unknown RepID=UPI0002338F2A	0	99.83	UniRef100_B9T740 60S ribosomal protein L34, putative n=1 Tax=Ricinus communis RepID=B9T740_RICCO	6e-33	51.43	AT1G73850.1 | Symbols: | Protein of unknown function (DUF1666) | chr1:27767375-27770386 FORWARD LENGTH=635	3e-169	99.83	GO:0006412	translation	GO:0003735	structural constituent of ribosome	GO:0005622 GO:0005840	intracellular; "ribosome"	PF07891	Protein of unknown function (DUF1666)	PTHR10759 PTHR10759:SF1	60S RIBOSOMAL PROTEIN L34; "60S RIBOSOMAL PROTEIN L34"	NA	NA	NA	NA	NA	NA
Glyma07g10240	325	UniRef100_I1KIX5 Uncharacterized protein n=2 Tax=Glycine max RepID=I1KIX5_SOYBN	0	99.69	UniRef100_G7KN39 NAC domain protein n=1 Tax=Medicago truncatula RepID=G7KN39_MEDTR	1e-173	99.69	AT3G18400.1 | Symbols: anac058, NAC058 | NAC domain containing protein 58 | chr3:6318745-6320593 REVERSE LENGTH=314	2e-114	99.69	GO:0006355 GO:0007275 GO:0010089 GO:0044036	regulation of transcription, DNA-dependent; "multicellular organismal development"; "xylem development"; "cell wall macromolecule metabolic process"	GO:0003677 GO:0003700	DNA binding; "sequence-specific DNA binding transcription factor activity"	GO:0005634	nucleus	PF02365	No apical meristem (NAM) protein	NA	NA	NA	NA	NA	NA	NA	NA
Glyma07g10250	224	UniRef100_I1KIX6 Uncharacterized protein (Fragment) n=1 Tax=Glycine max RepID=I1KIX6_SOYBN	2e-159	99.55	UniRef100_G7KN38 Monoglyceride lipase n=2 Tax=Medicago truncatula RepID=G7KN38_MEDTR	1e-134	95.98	AT5G16120.1 | Symbols: | alpha/beta-Hydrolases superfamily protein | chr5:5266048-5267775 FORWARD LENGTH=351	7e-87	93.75	NA	NA	GO:0016787	hydrolase activity	GO:0005737 GO:0009506	cytoplasm; "plasmodesma"	NA	NA	PTHR11614 PTHR11614:SF20	PHOSPHOLIPASE-RELATED; "LYSOPHOSPHOLIPASE"	NA	NA	NA	NA	NA	NA
Glyma07g10260	58	NA	NA	NA	NA	NA	NA	NA	NA	NA	NA	NA	NA	NA	NA	NA	NA	NA	NA	NA	NA	NA	NA	NA	NA	NA
Glyma07g10270	792	UniRef100_UPI0002338F2D UPI0002338F2D related cluster n=1 Tax=unknown RepID=UPI0002338F2D	0	91.92	UniRef100_G7KN37 Chloroplastic group IIA intron splicing facilitator CRS1 n=1 Tax=Medicago truncatula RepID=G7KN37_MEDTR	0	98.86	AT3G18390.1 | Symbols: EMB1865 | CRS1 / YhbY (CRM) domain-containing protein | chr3:6313572-6317584 FORWARD LENGTH=848	0	82.2	GO:0006655 GO:0009737 GO:0009793 GO:0009902 GO:0010027 GO:0016117 GO:0019288 GO:0034660	phosphatidylglycerol biosynthetic process; "response to abscisic acid stimulus"; "embryo development ending in seed dormancy"; "chloroplast relocation"; "thylakoid membrane organization"; "carotenoid biosynthetic process"; "isopentenyl diphosphate biosynthetic process, mevalonate-independent pathway"; "ncRNA metabolic process"	GO:0003723	RNA binding	GO:0009507	chloroplast	PF01985	CRS1 / YhbY (CRM) domain	NA	NA	KOG1990	Poly(A)-specific_exoribonuclease_PARN	NA	NA	NA	NA
Glyma07g10280	827	UniRef100_I1KIX8 Uncharacterized protein n=1 Tax=Glycine max RepID=I1KIX8_SOYBN	0	99.88	UniRef100_G7KN36 Plant synaptotagmin n=1 Tax=Medicago truncatula RepID=G7KN36_MEDTR	0	98.19	AT3G18370.1 | Symbols: SYTF, ATSYTF, NTMC2TYPE3, NTMC2T3 | C2 domain-containing protein | chr3:6306362-6310256 FORWARD LENGTH=815	0	98.19	GO:0008150	biological process	GO:0003674	molecular function	GO:0005783	endoplasmic reticulum	PF00168	C2 domain	PTHR10024 PTHR10024:SF126	SYNAPTOTAGMIN; "C2 DOMAIN-CONTAINING PROTEIN"	KOG1030	Predicted_Ca2+-dependent_phospholipid-binding_protein	NA	NA	NA	NA
Glyma07g10290	248	UniRef100_I1KIX9 Uncharacterized protein (Fragment) n=1 Tax=Glycine max RepID=I1KIX9_SOYBN	5e-135	74.19	UniRef100_G7ID96 Protein MKS1 n=1 Tax=Medicago truncatula RepID=G7ID96_MEDTR	4e-12	62.9	AT3G18360.1 | Symbols: | VQ motif-containing protein | chr3:6300827-6301684 REVERSE LENGTH=285	9e-25	66.94	GO:0008150	biological process	GO:0003674	molecular function	GO:0005634	nucleus	PF05678	VQ motif	NA	NA	NA	NA	NA	NA	NA	NA
Glyma07g10300	694	UniRef100_I1KIY0 Uncharacterized protein n=1 Tax=Glycine max RepID=I1KIY0_SOYBN	0	99.86	UniRef100_Q9LS55 Gb|AAD20392.1 n=1 Tax=Arabidopsis thaliana RepID=Q9LS55_ARATH	0	98.56	AT1G48840.1 | Symbols: | Plant protein of unknown function (DUF639) | chr1:18061931-18064811 FORWARD LENGTH=691	0	99.42	GO:0008150	biological process	GO:0003674	molecular function	GO:0005575	cellular component	PF04842	Plant protein of unknown function (DUF639)	NA	NA	NA	NA	NA	NA	NA	NA
Glyma07g10311	273	UniRef100_UPI0002338FE1 UPI0002338FE1 related cluster n=1 Tax=unknown RepID=UPI0002338FE1	0	99.63	UniRef100_G7KN12 Transcription factor BEE n=1 Tax=Medicago truncatula RepID=G7KN12_MEDTR	1e-128	99.63	AT1G73830.1 | Symbols: BEE3 | BR enhanced expression 3 | chr1:27760027-27761346 FORWARD LENGTH=261	3e-63	69.6	GO:0006355	regulation of transcription, DNA-dependent	GO:0003677 GO:0003700	DNA binding; "sequence-specific DNA binding transcription factor activity"	GO:0005634	nucleus	PF00010	Helix-loop-helix DNA-binding domain	PTHR12565 PTHR12565:SF7	STEROL REGULATORY ELEMENT-BINDING PROTEIN; "CENTROMERE-BINDING PROTEIN 1, CBP-1"	NA	NA	NA	NA	NA	NA
Glyma07g10321	308	UniRef100_I1L4B8 Uncharacterized protein n=2 Tax=Glycine max RepID=I1L4B8_SOYBN	0	99.68	UniRef100_Q0PJK4 MYB transcription factor MYB84 n=1 Tax=Glycine max RepID=Q0PJK4_SOYBN	2e-120	95.78	AT1G25340.1 | Symbols: MYB116, AtMYB116 | myb domain protein 116 | chr1:8885210-8886271 FORWARD LENGTH=283	4e-60	50.32	GO:0006355	regulation of transcription, DNA-dependent	GO:0003677 GO:0003700	DNA binding; "sequence-specific DNA binding transcription factor activity"	GO:0005634	nucleus	PF00249	Myb-like DNA-binding domain	PTHR10641	MYB-RELATED	KOG0048	Transcription_factor,_Myb_superfamily	NA	NA	NA	NA
Glyma07g10330	192	UniRef100_I1KIY3 Uncharacterized protein n=1 Tax=Glycine max RepID=I1KIY3_SOYBN	7e-135	99.48	UniRef100_B9T634 40S ribosomal protein S7, putative n=1 Tax=Ricinus communis RepID=B9T634_RICCO	3e-126	99.48	AT3G02560.2 | Symbols: | Ribosomal protein S7e family protein | chr3:542341-543168 FORWARD LENGTH=191	1e-110	99.48	GO:0006364 GO:0006412 GO:0042274	rRNA processing; "translation"; "ribosomal small subunit biogenesis"	GO:0003735	structural constituent of ribosome	GO:0005622 GO:0005829 GO:0005840 GO:0009507 GO:0016020 GO:0022626 GO:0022627 GO:0030686 GO:0032040	intracellular; "cytosol"; "ribosome"; "chloroplast"; "membrane"; "cytosolic ribosome"; "cytosolic small ribosomal subunit"; "90S preribosome"; "small-subunit processome"	PF01251	Ribosomal protein S7e	PTHR11278	40S RIBOSOMAL PROTEIN S7	KOG3320	40S_ribosomal_protein_S7	NA	NA	K02993	small_subunit_ribosomal_protein_S7e
Glyma07g10340	388	UniRef100_I1KIY5 Uncharacterized protein n=2 Tax=Glycine max RepID=I1KIY5_SOYBN	0	81.96	UniRef100_G7KN03 Cysteine-rich receptor-like protein kinase n=2 Tax=Medicago truncatula RepID=G7KN03_MEDTR	0	99.23	AT1G70740.1 | Symbols: | Protein kinase superfamily protein | chr1:26673847-26675687 REVERSE LENGTH=425	6e-109	87.63	GO:0006468	protein phosphorylation	GO:0004672 GO:0004674 GO:0004713 GO:0005524 GO:0016301 GO:0016772	protein kinase activity; "protein serine/threonine kinase activity"; "protein tyrosine kinase activity"; "ATP binding"; "kinase activity"; "transferase activity, transferring phosphorus-containing groups"	GO:0005634	nucleus	PF00069	Protein kinase domain	PTHR24420 PTHR24420:SF430	FAMILY NOT NAMED; "SUBFAMILY NOT NAMED"	KOG1187	Serine/threonine_protein_kinase	NA	NA	NA	NA
Glyma07g10350	520	UniRef100_I1KIY6 Uncharacterized protein n=1 Tax=Glycine max RepID=I1KIY6_SOYBN	0	99.81	UniRef100_G7KN01 STAM-binding protein n=1 Tax=Medicago truncatula RepID=G7KN01_MEDTR	0	99.81	AT1G48790.1 | Symbols: AMSH1 | associated molecule with the SH3 domain of STAM 1 | chr1:18043925-18047427 REVERSE LENGTH=507	0	97.88	GO:0006511 GO:0006623 GO:0016192	ubiquitin-dependent protein catabolic process; "protein targeting to vacuole"; "vesicle-mediated transport"	GO:0003674	molecular function	GO:0005634	nucleus	PF01398	Mov34/MPN/PAD-1 family	PTHR12947 PTHR12947:SF4	AMSH; "SUBFAMILY NOT NAMED"	KOG2880	SMAD6_interacting_protein_AMSH,_contains_JAB/MPN/Mov34_domain	NA	NA	NA	NA
Glyma07g10370	245	UniRef100_I1KIY7 Uncharacterized protein n=1 Tax=Glycine max RepID=I1KIY7_SOYBN	2e-176	99.59	UniRef100_Q9LS60 Gb|AAF26481.1 n=1 Tax=Arabidopsis thaliana RepID=Q9LS60_ARATH	6e-26	99.18	AT1G48780.1 | Symbols: | unknown protein; BEST Arabidopsis thaliana protein match is: unknown protein (TAIR:AT3G18300.1); Has 89 Blast hits to 89 proteins in 11 species: Archae - 0; Bacteria - 2; Metazoa - 0; Fungi - 0; Plants - 86; Viruses - 0; Other Eukaryotes - 1 (source: NCBI BLink). | chr1:18041989-18042744 FORWARD LENGTH=251	6e-31	95.92	GO:0008150	biological process	GO:0003674	molecular function	GO:0005634	nucleus	NA	NA	NA	NA	NA	NA	NA	NA	NA	NA
Glyma07g10381	93	UniRef100_UPI000233F5EE UPI000233F5EE related cluster n=1 Tax=unknown RepID=UPI000233F5EE	1e-36	98.92	UniRef100_G7L5Z8 Pleiotropic drug resistance protein n=1 Tax=Medicago truncatula RepID=G7L5Z8_MEDTR	1e-30	98.92	AT1G66950.1 | Symbols: PDR11, ATPDR11 | pleiotropic drug resistance 11 | chr1:24978239-24984461 FORWARD LENGTH=1454	5e-28	91.4	GO:0000302 GO:0006855	response to reactive oxygen species; "drug transmembrane transport"	GO:0000166 GO:0005524 GO:0016887 GO:0017111 GO:0042626	nucleotide binding; "ATP binding"; "ATPase activity"; "nucleoside-triphosphatase activity"; "ATPase activity, coupled to transmembrane movement of substances"	GO:0005886 GO:0016020	plasma membrane; "membrane"	NA	NA	PTHR19241 PTHR19241:SF10	ATP-BINDING CASSETTE TRANSPORTER; "ATP-BINDING CASSETTE TRANSPORTER-RELATED"	NA	NA	NA	NA	NA	NA
Glyma07g10390	199	UniRef100_C6TD89 Uncharacterized protein n=1 Tax=Glycine max RepID=C6TD89_SOYBN	3e-142	99.5	UniRef100_Q9C5E4 AT3G60410 protein n=1 Tax=Arabidopsis thaliana RepID=Q9C5E4_ARATH	2e-15	31.16	AT3G18295.1 | Symbols: | Protein of unknown function (DUF1639) | chr3:6281268-6282000 FORWARD LENGTH=216	4e-35	97.49	GO:0008150	biological process	GO:0003674	molecular function	GO:0005634 GO:0009507	nucleus; "chloroplast"	PF07797	Protein of unknown function (DUF1639)	NA	NA	NA	NA	NA	NA	NA	NA
Glyma07g10400	1243	UniRef100_I1KIY9 Uncharacterized protein n=1 Tax=Glycine max RepID=I1KIY9_SOYBN	0	99.92	UniRef100_G7KMZ7 Zinc finger protein-like protein n=1 Tax=Medicago truncatula RepID=G7KMZ7_MEDTR	0	99.84	AT3G18290.1 | Symbols: EMB2454, BTS | zinc finger protein-related | chr3:6274308-6280174 FORWARD LENGTH=1254	0	99.84	GO:0009793 GO:0010106	embryo development ending in seed dormancy; "cellular response to iron ion starvation"	GO:0008270	zinc ion binding	GO:0005634	nucleus	PF01814 PF05495	Hemerythrin HHE cation binding domain; "CHY zinc finger"	PTHR21319	RING FINGER AND CHY ZINC FINGER DOMAIN CONTAINING 1	KOG1940	Zn-finger_protein	NA	NA	NA	NA
Glyma07g10430	448	UniRef100_I1KIZ1 Uncharacterized protein n=1 Tax=Glycine max RepID=I1KIZ1_SOYBN	0	99.78	UniRef100_Q9M9C4 Core-2/I-branching beta-1,6-N-acetylglucosaminyltransferase family protein n=1 Tax=Arabidopsis thaliana RepID=Q9M9C4_ARATH	7e-145	68.75	AT1G68390.1 | Symbols: | Core-2/I-branching beta-1,6-N-acetylglucosaminyltransferase family protein | chr1:25642838-25645484 FORWARD LENGTH=408	1e-147	68.75	NA	NA	GO:0016757	transferase activity, transferring glycosyl groups	GO:0016020	membrane	PF02485	Core-2/I-Branching enzyme	NA	NA	NA	NA	NA	NA	NA	NA
Glyma07g10440	489	UniRef100_UPI000233909A UPI000233909A related cluster n=1 Tax=unknown RepID=UPI000233909A	0	99.8	UniRef100_Q9C9T2 Calmodulin binding protein-like protein n=2 Tax=Arabidopsis thaliana RepID=Q9C9T2_ARATH	5e-135	95.5	AT1G73805.1 | Symbols: | Calmodulin binding protein-like | chr1:27745761-27749178 REVERSE LENGTH=451	1e-137	95.5	GO:0000165 GO:0001666 GO:0002237 GO:0006355 GO:0006612 GO:0009581 GO:0009595 GO:0009617 GO:0009627 GO:0009697 GO:0009814 GO:0009862 GO:0009863 GO:0009867 GO:0010112 GO:0010200 GO:0010310 GO:0010363 GO:0031347 GO:0031348 GO:0035304 GO:0042742 GO:0043900 GO:0045087 GO:0045088 GO:0050832 GO:0080142	MAPK cascade; "response to hypoxia"; "response to molecule of bacterial origin"; "regulation of transcription, DNA-dependent"; "protein targeting to membrane"; "detection of external stimulus"; "detection of biotic stimulus"; "response to bacterium"; "systemic acquired resistance"; "salicylic acid biosynthetic process"; "defense response, incompatible interaction"; "systemic acquired resistance, …	GO:0003700 GO:0005516 GO:0043565	sequence-specific DNA binding transcription factor activity; "calmodulin binding"; "sequence-specific DNA binding"	GO:0005634	nucleus	PF07887	Calmodulin binding protein-like	NA	NA	NA	NA	NA	NA	NA	NA
Glyma07g10451	120	UniRef100_UPI0002338658 UPI0002338658 related cluster n=1 Tax=unknown RepID=UPI0002338658	7e-51	66.67	NA	NA	NA	NA	NA	NA	NA	NA	NA	NA	NA	NA	NA	NA	NA	NA	NA	NA	NA	NA	NA	NA
Glyma07g10460	640	UniRef100_I1KIZ4 Uncharacterized protein (Fragment) n=1 Tax=Glycine max RepID=I1KIZ4_SOYBN	0	93.91	UniRef100_G7KMN1 Kinase R-like protein n=1 Tax=Medicago truncatula RepID=G7KMN1_MEDTR	0	98.44	AT5G38260.1 | Symbols: | Protein kinase superfamily protein | chr5:15283692-15285837 REVERSE LENGTH=638	1e-135	96.72	GO:0006468	protein phosphorylation	GO:0004672 GO:0004674 GO:0005524 GO:0016301 GO:0016772	protein kinase activity; "protein serine/threonine kinase activity"; "ATP binding"; "kinase activity"; "transferase activity, transferring phosphorus-containing groups"	GO:0005886	plasma membrane	PF00069	Protein kinase domain	PTHR24420 PTHR24420:SF441	FAMILY NOT NAMED; "SUBFAMILY NOT NAMED"	KOG1187	Serine/threonine_protein_kinase	NA	NA	NA	NA
Glyma07g10475	519	UniRef100_UPI000233909C UPI000233909C related cluster n=1 Tax=unknown RepID=UPI000233909C	0	98.27	UniRef100_G7KMN1 Kinase R-like protein n=1 Tax=Medicago truncatula RepID=G7KMN1_MEDTR	0	96.15	AT1G66930.1 | Symbols: | Protein kinase superfamily protein | chr1:24970523-24973069 FORWARD LENGTH=674	1e-102	94.03	GO:0006468	protein phosphorylation	GO:0004672 GO:0004674 GO:0004713 GO:0005524 GO:0016301 GO:0016772	protein kinase activity; "protein serine/threonine kinase activity"; "protein tyrosine kinase activity"; "ATP binding"; "kinase activity"; "transferase activity, transferring phosphorus-containing groups"	GO:0005886	plasma membrane	PF00069	Protein kinase domain	PTHR24420 PTHR24420:SF441	FAMILY NOT NAMED; "SUBFAMILY NOT NAMED"	KOG2345	Serine/threonine_protein_kinase/TGF-beta_stimulated_factor	NA	NA	NA	NA
Glyma07g10490	626	UniRef100_UPI000233909D UPI000233909D related cluster n=1 Tax=unknown RepID=UPI000233909D	0	99.84	UniRef100_G7KMN1 Kinase R-like protein n=1 Tax=Medicago truncatula RepID=G7KMN1_MEDTR	0	97.28	AT5G38260.1 | Symbols: | Protein kinase superfamily protein | chr5:15283692-15285837 REVERSE LENGTH=638	9e-142	98.08	GO:0006468	protein phosphorylation	GO:0004672 GO:0004674 GO:0005524 GO:0016301 GO:0016772	protein kinase activity; "protein serine/threonine kinase activity"; "ATP binding"; "kinase activity"; "transferase activity, transferring phosphorus-containing groups"	GO:0005886	plasma membrane	PF07714	Protein tyrosine kinase	PTHR24420 PTHR24420:SF441	FAMILY NOT NAMED; "SUBFAMILY NOT NAMED"	KOG1187	Serine/threonine_protein_kinase	NA	NA	NA	NA
Glyma07g10496	93	UniRef100_I1L4A8 Uncharacterized protein n=2 Tax=Glycine max RepID=I1L4A8_SOYBN	8e-50	98.92	UniRef100_G7KMN1 Kinase R-like protein n=1 Tax=Medicago truncatula RepID=G7KMN1_MEDTR	1e-31	86.02	AT5G38260.1 | Symbols: | Protein kinase superfamily protein | chr5:15283692-15285837 REVERSE LENGTH=638	3e-19	80.65	GO:0006468	protein phosphorylation	GO:0004672 GO:0004674 GO:0005524 GO:0016301 GO:0016772	protein kinase activity; "protein serine/threonine kinase activity"; "ATP binding"; "kinase activity"; "transferase activity, transferring phosphorus-containing groups"	GO:0005886	plasma membrane	NA	NA	PTHR24420 PTHR24420:SF441	FAMILY NOT NAMED; "SUBFAMILY NOT NAMED"	NA	NA	NA	NA	NA	NA
Glyma07g10502	151	UniRef100_UPI000233909D UPI000233909D related cluster n=1 Tax=unknown RepID=UPI000233909D	3e-42	58.94	UniRef100_G7KMN1 Kinase R-like protein n=1 Tax=Medicago truncatula RepID=G7KMN1_MEDTR	1e-09	70.86	NA	NA	NA	NA	NA	NA	NA	NA	NA	NA	NA	NA	NA	NA	NA	NA	NA	NA	NA
Glyma07g10508	165	UniRef100_UPI000233909E UPI000233909E related cluster n=1 Tax=unknown RepID=UPI000233909E	4e-81	85.45	UniRef100_G7KMN1 Kinase R-like protein n=1 Tax=Medicago truncatula RepID=G7KMN1_MEDTR	1e-51	83.03	AT5G38280.1 | Symbols: PR5K | PR5-like receptor kinase | chr5:15293325-15295838 REVERSE LENGTH=665	1e-32	98.18	GO:0006468 GO:0009620 GO:0009691	protein phosphorylation; "response to fungus"; "cytokinin biosynthetic process"	GO:0004672 GO:0004674 GO:0004675 GO:0005524 GO:0016301 GO:0016772	protein kinase activity; "protein serine/threonine kinase activity"; "transmembrane receptor protein serine/threonine kinase activity"; "ATP binding"; "kinase activity"; "transferase activity, transferring phosphorus-containing groups"	GO:0005886 GO:0009506	plasma membrane; "plasmodesma"	PF07714	Protein tyrosine kinase	PTHR24420 PTHR24420:SF441	FAMILY NOT NAMED; "SUBFAMILY NOT NAMED"	NA	NA	NA	NA	NA	NA
Glyma07g10514	316	UniRef100_I1L4A4 Uncharacterized protein n=1 Tax=Glycine max RepID=I1L4A4_SOYBN	7e-157	94.62	UniRef100_C6ZRM5 Serine/threonine protein kinase family protein n=1 Tax=Glycine max RepID=C6ZRM5_SOYBN	3e-103	78.48	AT1G18390.2 | Symbols: | Protein kinase superfamily protein | chr1:6327463-6329935 FORWARD LENGTH=654	8e-24	78.16	GO:0002679 GO:0006468 GO:0006984 GO:0009407 GO:0010200 GO:0010583 GO:0034976	respiratory burst involved in defense response; "protein phosphorylation"; "ER-nucleus signaling pathway"; "toxin catabolic process"; "response to chitin"; "response to cyclopentenone"; "response to endoplasmic reticulum stress"	GO:0004672 GO:0004674 GO:0004713 GO:0005524 GO:0016301 GO:0016772	protein kinase activity; "protein serine/threonine kinase activity"; "protein tyrosine kinase activity"; "ATP binding"; "kinase activity"; "transferase activity, transferring phosphorus-containing groups"	GO:0005576 GO:0005886	extracellular region; "plasma membrane"	NA	NA	NA	NA	NA	NA	NA	NA	NA	NA
Glyma07g10520	105	NA	NA	NA	NA	NA	NA	NA	NA	NA	NA	NA	NA	NA	NA	NA	NA	NA	NA	NA	NA	NA	NA	NA	NA	NA
Glyma07g10541	638	UniRef100_UPI000233909D UPI000233909D related cluster n=1 Tax=unknown RepID=UPI000233909D	0	98.75	UniRef100_G7KMN1 Kinase R-like protein n=1 Tax=Medicago truncatula RepID=G7KMN1_MEDTR	0	95.3	AT5G38260.1 | Symbols: | Protein kinase superfamily protein | chr5:15283692-15285837 REVERSE LENGTH=638	1e-143	95.92	GO:0006468	protein phosphorylation	GO:0004672 GO:0004674 GO:0005524 GO:0016301 GO:0016772	protein kinase activity; "protein serine/threonine kinase activity"; "ATP binding"; "kinase activity"; "transferase activity, transferring phosphorus-containing groups"	GO:0005886	plasma membrane	PF07714	Protein tyrosine kinase	PTHR24420 PTHR24420:SF441	FAMILY NOT NAMED; "SUBFAMILY NOT NAMED"	KOG1187	Serine/threonine_protein_kinase	NA	NA	NA	NA
Glyma07g10561	375	UniRef100_UPI000233909E UPI000233909E related cluster n=1 Tax=unknown RepID=UPI000233909E	0	98.4	UniRef100_G7KMN1 Kinase R-like protein n=1 Tax=Medicago truncatula RepID=G7KMN1_MEDTR	0	97.87	AT1G70250.1 | Symbols: | receptor serine/threonine kinase, putative | chr1:26452975-26456088 FORWARD LENGTH=799	2e-127	93.07	GO:0006468	protein phosphorylation	GO:0004672 GO:0004674 GO:0004675 GO:0004713 GO:0005524 GO:0016772	protein kinase activity; "protein serine/threonine kinase activity"; "transmembrane receptor protein serine/threonine kinase activity"; "protein tyrosine kinase activity"; "ATP binding"; "transferase activity, transferring phosphorus-containing groups"	GO:0005886	plasma membrane	PF07714	Protein tyrosine kinase	PTHR24420 PTHR24420:SF441	FAMILY NOT NAMED; "SUBFAMILY NOT NAMED"	KOG1187	Serine/threonine_protein_kinase	NA	NA	NA	NA
Glyma07g10581	250	UniRef100_I1KJ00 Uncharacterized protein n=1 Tax=Glycine max RepID=I1KJ00_SOYBN	1e-176	99.6	UniRef100_Q5N7Q6 Receptor-like protein kinase-like n=2 Tax=Oryza sativa Japonica Group RepID=Q5N7Q6_ORYSJ	1e-24	89.6	AT1G18390.2 | Symbols: | Protein kinase superfamily protein | chr1:6327463-6329935 FORWARD LENGTH=654	1e-19	97.2	GO:0002679 GO:0006468 GO:0006984 GO:0009407 GO:0010200 GO:0010583 GO:0034976	respiratory burst involved in defense response; "protein phosphorylation"; "ER-nucleus signaling pathway"; "toxin catabolic process"; "response to chitin"; "response to cyclopentenone"; "response to endoplasmic reticulum stress"	GO:0004672 GO:0004674 GO:0004713 GO:0005524 GO:0016301 GO:0016772	protein kinase activity; "protein serine/threonine kinase activity"; "protein tyrosine kinase activity"; "ATP binding"; "kinase activity"; "transferase activity, transferring phosphorus-containing groups"	GO:0005576 GO:0005886	extracellular region; "plasma membrane"	NA	NA	NA	NA	NA	NA	NA	NA	NA	NA
Glyma07g10601	608	UniRef100_UPI000233909D UPI000233909D related cluster n=1 Tax=unknown RepID=UPI000233909D	0	92.43	UniRef100_G7KMN1 Kinase R-like protein n=1 Tax=Medicago truncatula RepID=G7KMN1_MEDTR	0	91.94	AT5G38260.1 | Symbols: | Protein kinase superfamily protein | chr5:15283692-15285837 REVERSE LENGTH=638	3e-131	96.22	GO:0006468	protein phosphorylation	GO:0004672 GO:0004674 GO:0005524 GO:0016301 GO:0016772	protein kinase activity; "protein serine/threonine kinase activity"; "ATP binding"; "kinase activity"; "transferase activity, transferring phosphorus-containing groups"	GO:0005886	plasma membrane	PF07714	Protein tyrosine kinase	PTHR24420 PTHR24420:SF441	FAMILY NOT NAMED; "SUBFAMILY NOT NAMED"	KOG1187	Serine/threonine_protein_kinase	NA	NA	NA	NA
Glyma07g10621	636	UniRef100_UPI000233909F UPI000233909F related cluster n=1 Tax=unknown RepID=UPI000233909F	0	97.64	UniRef100_G7KMN1 Kinase R-like protein n=1 Tax=Medicago truncatula RepID=G7KMN1_MEDTR	0	98.58	AT5G38260.1 | Symbols: | Protein kinase superfamily protein | chr5:15283692-15285837 REVERSE LENGTH=638	4e-133	99.53	GO:0006468	protein phosphorylation	GO:0004672 GO:0004674 GO:0005524 GO:0016301 GO:0016772	protein kinase activity; "protein serine/threonine kinase activity"; "ATP binding"; "kinase activity"; "transferase activity, transferring phosphorus-containing groups"	GO:0005886	plasma membrane	PF00069	Protein kinase domain	PTHR24420 PTHR24420:SF441	FAMILY NOT NAMED; "SUBFAMILY NOT NAMED"	KOG1187	Serine/threonine_protein_kinase	NA	NA	NA	NA
Glyma07g10641	530	UniRef100_UPI00023390A2 UPI00023390A2 related cluster n=1 Tax=unknown RepID=UPI00023390A2	0	98.87	UniRef100_G7KMN1 Kinase R-like protein n=1 Tax=Medicago truncatula RepID=G7KMN1_MEDTR	0	67.92	AT5G38280.1 | Symbols: PR5K | PR5-like receptor kinase | chr5:15293325-15295838 REVERSE LENGTH=665	3e-125	74.53	GO:0006468 GO:0009620 GO:0009691	protein phosphorylation; "response to fungus"; "cytokinin biosynthetic process"	GO:0004672 GO:0004674 GO:0004675 GO:0005524 GO:0016301 GO:0016772	protein kinase activity; "protein serine/threonine kinase activity"; "transmembrane receptor protein serine/threonine kinase activity"; "ATP binding"; "kinase activity"; "transferase activity, transferring phosphorus-containing groups"	GO:0005886 GO:0009506	plasma membrane; "plasmodesma"	PF00069	Protein kinase domain	PTHR24420 PTHR24420:SF441	FAMILY NOT NAMED; "SUBFAMILY NOT NAMED"	KOG1187	Serine/threonine_protein_kinase	NA	NA	NA	NA
Glyma07g10661	355	UniRef100_UPI00023390A1 UPI00023390A1 related cluster n=1 Tax=unknown RepID=UPI00023390A1	0	99.72	UniRef100_G7KMN1 Kinase R-like protein n=1 Tax=Medicago truncatula RepID=G7KMN1_MEDTR	0	99.72	AT1G66910.1 | Symbols: | Protein kinase superfamily protein | chr1:24961634-24963941 REVERSE LENGTH=666	1e-126	89.3	GO:0006468	protein phosphorylation	GO:0004672 GO:0004674 GO:0004713 GO:0005524 GO:0016301 GO:0016772	protein kinase activity; "protein serine/threonine kinase activity"; "protein tyrosine kinase activity"; "ATP binding"; "kinase activity"; "transferase activity, transferring phosphorus-containing groups"	GO:0005886	plasma membrane	PF07714	Protein tyrosine kinase	PTHR24420 PTHR24420:SF441	FAMILY NOT NAMED; "SUBFAMILY NOT NAMED"	KOG1187	Serine/threonine_protein_kinase	NA	NA	NA	NA
Glyma07g10680	543	UniRef100_UPI00023390A2 UPI00023390A2 related cluster n=1 Tax=unknown RepID=UPI00023390A2	0	99.82	UniRef100_G7KMN1 Kinase R-like protein n=1 Tax=Medicago truncatula RepID=G7KMN1_MEDTR	0	67.03	AT5G38280.1 | Symbols: PR5K | PR5-like receptor kinase | chr5:15293325-15295838 REVERSE LENGTH=665	2e-124	72.74	GO:0006468 GO:0009620 GO:0009691	protein phosphorylation; "response to fungus"; "cytokinin biosynthetic process"	GO:0004672 GO:0004674 GO:0004675 GO:0005524 GO:0016301 GO:0016772	protein kinase activity; "protein serine/threonine kinase activity"; "transmembrane receptor protein serine/threonine kinase activity"; "ATP binding"; "kinase activity"; "transferase activity, transferring phosphorus-containing groups"	GO:0005886 GO:0009506	plasma membrane; "plasmodesma"	PF07714	Protein tyrosine kinase	PTHR24420 PTHR24420:SF441	FAMILY NOT NAMED; "SUBFAMILY NOT NAMED"	KOG1187	Serine/threonine_protein_kinase	NA	NA	NA	NA
Glyma07g10695	705	UniRef100_I1KIZ9 Uncharacterized protein n=1 Tax=Glycine max RepID=I1KIZ9_SOYBN	0	91.49	UniRef100_C6ZRM5 Serine/threonine protein kinase family protein n=1 Tax=Glycine max RepID=C6ZRM5_SOYBN	0	48.79	AT1G18390.2 | Symbols: | Protein kinase superfamily protein | chr1:6327463-6329935 FORWARD LENGTH=654	0	94.33	GO:0002679 GO:0006468 GO:0006984 GO:0009407 GO:0010200 GO:0010583 GO:0034976	respiratory burst involved in defense response; "protein phosphorylation"; "ER-nucleus signaling pathway"; "toxin catabolic process"; "response to chitin"; "response to cyclopentenone"; "response to endoplasmic reticulum stress"	GO:0004672 GO:0004674 GO:0004713 GO:0005524 GO:0016301 GO:0016772	protein kinase activity; "protein serine/threonine kinase activity"; "protein tyrosine kinase activity"; "ATP binding"; "kinase activity"; "transferase activity, transferring phosphorus-containing groups"	GO:0005576 GO:0005886	extracellular region; "plasma membrane"	PF00069	Protein kinase domain	PTHR24420 PTHR24420:SF426	FAMILY NOT NAMED; "SUBFAMILY NOT NAMED"	KOG1187	Serine/threonine_protein_kinase	NA	NA	NA	NA
Glyma07g10710	250	UniRef100_I1KJ00 Uncharacterized protein n=1 Tax=Glycine max RepID=I1KJ00_SOYBN	0	99.6	UniRef100_Q5N7Q6 Receptor-like protein kinase-like n=2 Tax=Oryza sativa Japonica Group RepID=Q5N7Q6_ORYSJ	5e-24	89.6	AT1G18390.2 | Symbols: | Protein kinase superfamily protein | chr1:6327463-6329935 FORWARD LENGTH=654	2e-19	88	GO:0002679 GO:0006468 GO:0006984 GO:0009407 GO:0010200 GO:0010583 GO:0034976	respiratory burst involved in defense response; "protein phosphorylation"; "ER-nucleus signaling pathway"; "toxin catabolic process"; "response to chitin"; "response to cyclopentenone"; "response to endoplasmic reticulum stress"	GO:0004672 GO:0004674 GO:0004713 GO:0005524 GO:0016301 GO:0016772	protein kinase activity; "protein serine/threonine kinase activity"; "protein tyrosine kinase activity"; "ATP binding"; "kinase activity"; "transferase activity, transferring phosphorus-containing groups"	GO:0005576 GO:0005886	extracellular region; "plasma membrane"	NA	NA	NA	NA	NA	NA	NA	NA	NA	NA
Glyma07g10731	639	UniRef100_I1KJ01 Uncharacterized protein n=1 Tax=Glycine max RepID=I1KJ01_SOYBN	0	99.84	UniRef100_B9SFY5 Wall-associated kinase, putative n=1 Tax=Ricinus communis RepID=B9SFY5_RICCO	2e-88	45.38	AT1G18390.2 | Symbols: | Protein kinase superfamily protein | chr1:6327463-6329935 FORWARD LENGTH=654	1e-87	46.17	GO:0002679 GO:0006468 GO:0006984 GO:0009407 GO:0010200 GO:0010583 GO:0034976	respiratory burst involved in defense response; "protein phosphorylation"; "ER-nucleus signaling pathway"; "toxin catabolic process"; "response to chitin"; "response to cyclopentenone"; "response to endoplasmic reticulum stress"	GO:0004672 GO:0004674 GO:0004713 GO:0005524 GO:0016301 GO:0016772	protein kinase activity; "protein serine/threonine kinase activity"; "protein tyrosine kinase activity"; "ATP binding"; "kinase activity"; "transferase activity, transferring phosphorus-containing groups"	GO:0005576 GO:0005886	extracellular region; "plasma membrane"	PF07714	Protein tyrosine kinase	PTHR24420 PTHR24420:SF426	FAMILY NOT NAMED; "SUBFAMILY NOT NAMED"	KOG1187	Serine/threonine_protein_kinase	NA	NA	NA	NA
Glyma07g10751	415	UniRef100_I1KJ01 Uncharacterized protein n=1 Tax=Glycine max RepID=I1KJ01_SOYBN	0	99.76	UniRef100_B9SFY5 Wall-associated kinase, putative n=1 Tax=Ricinus communis RepID=B9SFY5_RICCO	1e-93	70.84	AT1G18390.1 | Symbols: | Protein kinase superfamily protein | chr1:6325876-6329935 FORWARD LENGTH=648	2e-94	71.08	GO:0002679 GO:0006468 GO:0006984 GO:0009407 GO:0010200 GO:0010583 GO:0034976	respiratory burst involved in defense response; "protein phosphorylation"; "ER-nucleus signaling pathway"; "toxin catabolic process"; "response to chitin"; "response to cyclopentenone"; "response to endoplasmic reticulum stress"	GO:0004672 GO:0004674 GO:0004713 GO:0005524 GO:0016301 GO:0016772	protein kinase activity; "protein serine/threonine kinase activity"; "protein tyrosine kinase activity"; "ATP binding"; "kinase activity"; "transferase activity, transferring phosphorus-containing groups"	GO:0005576 GO:0005886	extracellular region; "plasma membrane"	PF07714	Protein tyrosine kinase	PTHR24420 PTHR24420:SF426	FAMILY NOT NAMED; "SUBFAMILY NOT NAMED"	KOG1187	Serine/threonine_protein_kinase	NA	NA	NA	NA
Glyma07g10771	268	UniRef100_I1L4A0 Uncharacterized protein n=1 Tax=Glycine max RepID=I1L4A0_SOYBN	6e-149	99.25	UniRef100_Q7Y149 Expressed protein n=1 Tax=Oryza sativa Japonica Group RepID=Q7Y149_ORYSJ	3e-51	99.25	AT1G15030.1 | Symbols: | Protein of unknown function (DUF789) | chr1:5177895-5179853 FORWARD LENGTH=360	7e-64	96.64	GO:0008150	biological process	GO:0003674	molecular function	GO:0005634	nucleus	PF05623	Protein of unknown function (DUF789)	NA	NA	NA	NA	NA	NA	NA	NA
Glyma07g10790	963	UniRef100_I1KJ06 Uncharacterized protein n=1 Tax=Glycine max RepID=I1KJ06_SOYBN	0	99.9	UniRef100_G7KML0 Kinesin-like protein KIF3A n=1 Tax=Medicago truncatula RepID=G7KML0_MEDTR	0	99.9	AT1G18370.1 | Symbols: HIK, ATNACK1, NACK1 | ATP binding microtubule motor family protein | chr1:6319732-6323820 REVERSE LENGTH=974	0	99.9	GO:0000226 GO:0000910 GO:0000911 GO:0007018 GO:0008283 GO:0009555 GO:0009558 GO:0010583 GO:0016572 GO:0048229 GO:0051322 GO:0051329	microtubule cytoskeleton organization; "cytokinesis"; "cytokinesis by cell plate formation"; "microtubule-based movement"; "cell proliferation"; "pollen development"; "embryo sac cellularization"; "response to cyclopentenone"; "histone phosphorylation"; "gametophyte development"; "anaphase"; "interphase of mitotic cell cycle"	GO:0003777 GO:0005524	microtubule motor activity; "ATP binding"	GO:0005737	cytoplasm	PF00225 PF11995	Kinesin motor domain; "Domain of unknown function (DUF3490)"	PTHR24115 PTHR24115:SF323	FAMILY NOT NAMED; ""	KOG0242	Kinesin-like_protein	NA	NA	NA	NA
Glyma07g10805	562	UniRef100_UPI000233865A UPI000233865A related cluster n=1 Tax=unknown RepID=UPI000233865A	0	99.82	UniRef100_G7JZT7 Phosphoacetylglucosamine mutase n=1 Tax=Medicago truncatula RepID=G7JZT7_MEDTR	0	99.11	AT5G18070.1 | Symbols: DRT101 | phosphoglucosamine mutase-related | chr5:5981117-5982787 FORWARD LENGTH=556	0	99.11	GO:0000719 GO:0005975 GO:0006048 GO:0009411 GO:0019255	photoreactive repair; "carbohydrate metabolic process"; "UDP-N-acetylglucosamine biosynthetic process"; "response to UV"; "glucose 1-phosphate metabolic process"	GO:0004610 GO:0004614 GO:0016868	phosphoacetylglucosamine mutase activity; "phosphoglucomutase activity"; "intramolecular transferase activity, phosphotransferases"	GO:0005739 GO:0005829 GO:0009506 GO:0009507	mitochondrion; "cytosol"; "plasmodesma"; "chloroplast"	PF00408 PF02878 PF02879 PF02880	Phosphoglucomutase/phosphomannomutase, C-terminal domain; "Phosphoglucomutase/phosphomannomutase, alpha/beta/alpha domain I"; "Phosphoglucomutase/phosphomannomutase, alpha/beta/alpha domain II"; "Phosphoglucomutase/phosphomannomutase, alpha/beta/alpha domain III"	PTHR22573 PTHR22573:SF3	PHOSPHOHEXOMUTASE FAMILY MEMBER; "PHOSPHOGLUCOMUTASE"	KOG2537	Phosphoglucomutase/phosphomannomutase	NA	NA	NA	NA
Glyma07g10820	94	UniRef100_I1KJ10 Uncharacterized protein n=1 Tax=Glycine max RepID=I1KJ10_SOYBN	2e-58	98.94	UniRef100_B7FM99 Non-specific lipid-transfer protein n=1 Tax=Medicago truncatula RepID=B7FM99_MEDTR	2e-46	98.94	AT3G18280.1 | Symbols: | Bifunctional inhibitor/lipid-transfer protein/seed storage 2S albumin superfamily protein | chr3:6267102-6267392 FORWARD LENGTH=96	7e-34	98.94	GO:0006612 GO:0006869 GO:0009963 GO:0010363	protein targeting to membrane; "lipid transport"; "positive regulation of flavonoid biosynthetic process"; "regulation of plant-type hypersensitive response"	GO:0008289	lipid binding	GO:0005576	extracellular region	NA	NA	NA	NA	NA	NA	NA	NA	NA	NA
Glyma07g10831	122	UniRef100_UPI00023390A6 UPI00023390A6 related cluster n=1 Tax=unknown RepID=UPI00023390A6	1e-67	96.72	UniRef100_A1IGR3 Chlorophyllase 2 n=1 Tax=Glycine max RepID=A1IGR3_SOYBN	2e-45	96.72	NA	NA	NA	NA	NA	NA	NA	NA	NA	PF07224	Chlorophyllase	NA	NA	NA	NA	NA	NA	NA	NA
Glyma07g10840	317	UniRef100_A1IGR3 Chlorophyllase 2 n=1 Tax=Glycine max RepID=A1IGR3_SOYBN	0	99.68	UniRef100_A1IGR3 Chlorophyllase 2 n=1 Tax=Glycine max RepID=A1IGR3_SOYBN	0	99.68	AT1G19670.1 | Symbols: ATCLH1, CORI1, ATHCOR1, CLH1 | chlorophyllase 1 | chr1:6803796-6804923 REVERSE LENGTH=324	2e-94	95.27	GO:0000165 GO:0006355 GO:0006612 GO:0009617 GO:0009862 GO:0009867 GO:0010310 GO:0010363 GO:0015996 GO:0031348 GO:0035304 GO:0042742 GO:0050832	MAPK cascade; "regulation of transcription, DNA-dependent"; "protein targeting to membrane"; "response to bacterium"; "systemic acquired resistance, salicylic acid mediated signaling pathway"; "jasmonic acid mediated signaling pathway"; "regulation of hydrogen peroxide metabolic process"; "regulation of plant-type hypersensitive response"; "chlorophyll catabolic process"; "negative regulation of …	GO:0047746	chlorophyllase activity	GO:0005773 GO:0009507	vacuole; "chloroplast"	PF07224	Chlorophyllase	NA	NA	NA	NA	3.1.1.14	Chlorophyllase	K08099	chlorophyllase_[EC:3.1.1.14]
Glyma07g10860	308	UniRef100_I1KJ12 Uncharacterized protein n=2 Tax=Glycine max RepID=I1KJ12_SOYBN	0	94.81	UniRef100_A1IGR3 Chlorophyllase 2 n=1 Tax=Glycine max RepID=A1IGR3_SOYBN	6e-161	99.35	AT1G19670.1 | Symbols: ATCLH1, CORI1, ATHCOR1, CLH1 | chlorophyllase 1 | chr1:6803796-6804923 REVERSE LENGTH=324	2e-92	95.13	GO:0000165 GO:0006355 GO:0006612 GO:0009617 GO:0009862 GO:0009867 GO:0010310 GO:0010363 GO:0015996 GO:0031348 GO:0035304 GO:0042742 GO:0050832	MAPK cascade; "regulation of transcription, DNA-dependent"; "protein targeting to membrane"; "response to bacterium"; "systemic acquired resistance, salicylic acid mediated signaling pathway"; "jasmonic acid mediated signaling pathway"; "regulation of hydrogen peroxide metabolic process"; "regulation of plant-type hypersensitive response"; "chlorophyll catabolic process"; "negative regulation of …	GO:0047746	chlorophyllase activity	GO:0005773 GO:0009507	vacuole; "chloroplast"	PF07224	Chlorophyllase	NA	NA	NA	NA	3.1.1.14	Chlorophyllase	K08099	chlorophyllase_[EC:3.1.1.14]
Glyma07g10870	223	UniRef100_I1KJ13 Uncharacterized protein n=1 Tax=Glycine max RepID=I1KJ13_SOYBN	5e-161	99.55	UniRef100_Q9LJQ5 Reticulon-like protein B9 n=1 Tax=Arabidopsis thaliana RepID=RTNLI_ARATH	9e-79	96.86	AT3G18260.1 | Symbols: | Reticulon family protein | chr3:6260328-6261504 REVERSE LENGTH=225	2e-81	96.86	GO:0008150	biological process	GO:0003674	molecular function	GO:0005739 GO:0005783	mitochondrion; "endoplasmic reticulum"	PF02453	Reticulon	PTHR10994 PTHR10994:SF27	RETICULON/NOGO; "RETICULON-RELATED (PLANT)"	KOG1792	Reticulon	NA	NA	NA	NA
Glyma07g10881	104	NA	NA	NA	NA	NA	NA	NA	NA	NA	NA	NA	NA	NA	NA	NA	NA	NA	NA	NA	NA	NA	NA	NA	NA	NA
Glyma07g10890	460	UniRef100_I1KJ15 Uncharacterized protein n=1 Tax=Glycine max RepID=I1KJ15_SOYBN	0	98.48	UniRef100_G7L5D2 Pentatricopeptide repeat protein n=1 Tax=Medicago truncatula RepID=G7L5D2_MEDTR	0	99.78	AT5G66520.1 | Symbols: | Tetratricopeptide repeat (TPR)-like superfamily protein | chr5:26551879-26553741 FORWARD LENGTH=620	2e-96	94.57	GO:0008150 GO:0016556	biological process; "mRNA modification"	NA	NA	GO:0005575	cellular component	PF01535	PPR repeat	PTHR24015	FAMILY NOT NAMED	NA	NA	NA	NA	NA	NA
Glyma07g10896	125	UniRef100_UPI0002338D33 UPI0002338D33 related cluster n=1 Tax=unknown RepID=UPI0002338D33	8e-56	80	UniRef100_Q9LJQ6 AT3G18240 protein n=1 Tax=Arabidopsis thaliana RepID=Q9LJQ6_ARATH	3e-09	96.8	AT3G18240.2 | Symbols: | Ribosomal protein S24/S35, mitochondrial | chr3:6255810-6257695 FORWARD LENGTH=419	6e-12	96.8	GO:0008150	biological process	GO:0003674	molecular function	GO:0005634 GO:0005739 GO:0005829	nucleus; "mitochondrion"; "cytosol"	NA	NA	NA	NA	NA	NA	NA	NA	NA	NA
Glyma07g10903	149	UniRef100_I1KJ16 Uncharacterized protein (Fragment) n=1 Tax=Glycine max RepID=I1KJ16_SOYBN	5e-59	77.18	UniRef100_Q9LJQ5 Reticulon-like protein B9 n=1 Tax=Arabidopsis thaliana RepID=RTNLI_ARATH	2e-16	95.97	AT3G18260.1 | Symbols: | Reticulon family protein | chr3:6260328-6261504 REVERSE LENGTH=225	5e-19	95.97	GO:0008150	biological process	GO:0003674	molecular function	GO:0005739 GO:0005783	mitochondrion; "endoplasmic reticulum"	PF02453	Reticulon	NA	NA	KOG1792	Reticulon	NA	NA	NA	NA
Glyma07g10910	76	UniRef100_C6TAL9 Putative uncharacterized protein (Fragment) n=1 Tax=Glycine max RepID=C6TAL9_SOYBN	2e-40	88.16	NA	NA	NA	NA	NA	NA	NA	NA	NA	NA	NA	NA	NA	NA	NA	NA	NA	NA	NA	NA	NA	NA
Glyma07g10920	185	UniRef100_I1KJ17 Uncharacterized protein (Fragment) n=1 Tax=Glycine max RepID=I1KJ17_SOYBN	7e-115	92.97	UniRef100_G7K3P1 40S ribosomal protein S3a-like protein n=1 Tax=Medicago truncatula RepID=G7K3P1_MEDTR	3e-90	91.35	AT3G04840.1 | Symbols: | Ribosomal protein S3Ae | chr3:1329751-1331418 FORWARD LENGTH=262	3e-80	91.35	GO:0001510 GO:0006412 GO:0009220	RNA methylation; "translation"; "pyrimidine ribonucleotide biosynthetic process"	GO:0003735	structural constituent of ribosome	GO:0005622 GO:0005737 GO:0005829 GO:0005840 GO:0005886 GO:0009506 GO:0009507 GO:0022626 GO:0022627	intracellular; "cytoplasm"; "cytosol"; "ribosome"; "plasma membrane"; "plasmodesma"; "chloroplast"; "cytosolic ribosome"; "cytosolic small ribosomal subunit"	PF01015	Ribosomal S3Ae family	PTHR11830	40S RIBOSOMAL PROTEIN S3A	KOG1628	40S_ribosomal_protein_S3A	NA	NA	NA	NA
Glyma07g10930	355	UniRef100_I1KJ18 Uncharacterized protein n=1 Tax=Glycine max RepID=I1KJ18_SOYBN	0	99.72	UniRef100_G7KMM3 RING finger protein n=2 Tax=Medicago truncatula RepID=G7KMM3_MEDTR	4e-142	99.44	AT1G73760.1 | Symbols: | RING/U-box superfamily protein | chr1:27739366-27741161 REVERSE LENGTH=367	1e-79	96.9	NA	NA	GO:0008270	zinc ion binding	GO:0005634	nucleus	PF00097	Zinc finger, C3HC4 type (RING finger)	PTHR22937 PTHR22937:SF9	RING FINGER CONTAINING PROTEIN; "ZINC FINGER (C3HC4-TYPE RING FINGER) FAMILY PROTEI"	KOG1493	Anaphase-promoting_complex_(APC),_subunit_11	NA	NA	NA	NA
Glyma07g10940	544	UniRef100_UPI0002338FD7 UPI0002338FD7 related cluster n=1 Tax=unknown RepID=UPI0002338FD7	0	99.82	UniRef100_B9SJW6 Catalytic, putative n=1 Tax=Ricinus communis RepID=B9SJW6_RICCO	0	88.24	AT1G15060.1 | Symbols: | Uncharacterised conserved protein UCP031088, alpha/beta hydrolase | chr1:5184053-5186856 REVERSE LENGTH=578	0	88.42	NA	NA	NA	NA	GO:0009507	chloroplast	NA	NA	NA	NA	NA	NA	NA	NA	NA	NA
Glyma07g10950	678	UniRef100_I1KJ20 Uncharacterized protein n=1 Tax=Glycine max RepID=I1KJ20_SOYBN	0	94.54	UniRef100_Q9ZU48 Expressed protein n=1 Tax=Arabidopsis thaliana RepID=Q9ZU48_ARATH	4e-97	92.63	AT2G01190.1 | Symbols: | Octicosapeptide/Phox/Bem1p family protein | chr2:115023-117296 FORWARD LENGTH=720	8e-100	92.63	NA	NA	NA	NA	GO:0005634 GO:0005829	nucleus; "cytosol"	PF00564	PB1 domain	NA	NA	NA	NA	NA	NA	NA	NA
Glyma07g10973	141	UniRef100_I1L490 Uncharacterized protein n=1 Tax=Glycine max RepID=I1L490_SOYBN	9e-66	80.14	NA	NA	NA	NA	NA	NA	NA	NA	NA	NA	NA	NA	NA	NA	NA	NA	NA	NA	NA	NA	NA	NA
Glyma07g10996	104	UniRef100_I1L488 Uncharacterized protein n=1 Tax=Glycine max RepID=I1L488_SOYBN	4e-40	72.12	UniRef100_G7KMJ3 Mitochondrial protein, putative n=2 Tax=Medicago truncatula RepID=G7KMJ3_MEDTR	2e-26	68.27	AT4G05030.1 | Symbols: | Copper transport protein family | chr4:2576790-2577974 REVERSE LENGTH=110	5e-15	69.23	NA	NA	GO:0046872	metal ion binding	NA	NA	PF00403	Heavy-metal-associated domain	PTHR22814 PTHR22814:SF5	COPPER TRANSPORT PROTEIN ATOX1-RELATED; "UNCHARACTERIZED"	NA	NA	NA	NA	NA	NA
Glyma07g11020	115	UniRef100_I1NBL5 Uncharacterized protein n=1 Tax=Glycine max RepID=I1NBL5_SOYBN	3e-57	94.78	UniRef100_D7U9V2 Translation initiation factor IF-2 n=1 Tax=Vitis vinifera RepID=D7U9V2_VITVI	4e-50	94.78	AT4G11160.1 | Symbols: | Translation initiation factor 2, small GTP-binding protein | chr4:6803846-6806726 FORWARD LENGTH=743	2e-44	94.78	GO:0006413 GO:0009165 GO:0009887 GO:0009888 GO:0010228 GO:0010638 GO:0016926 GO:0033044 GO:0050665	translational initiation; "nucleotide biosynthetic process"; "organ morphogenesis"; "tissue development"; "vegetative to reproductive phase transition of meristem"; "positive regulation of organelle organization"; "protein desumoylation"; "regulation of chromosome organization"; "hydrogen peroxide biosynthetic process"	GO:0003743 GO:0003924 GO:0005525	translation initiation factor activity; "GTPase activity"; "GTP binding"	GO:0005622	intracellular	PF00009	Elongation factor Tu GTP binding domain	PTHR23115 PTHR23115:SF41	TRANSLATION FACTOR; ""	NA	NA	NA	NA	NA	NA
Glyma07g11025	124	UniRef100_UPI0002338FD5 UPI0002338FD5 related cluster n=1 Tax=unknown RepID=UPI0002338FD5	8e-40	99.19	UniRef100_B9T469 Metal ion binding protein, putative n=1 Tax=Ricinus communis RepID=B9T469_RICCO	2e-16	99.19	AT5G48290.1 | Symbols: | Heavy metal transport/detoxification superfamily protein | chr5:19568980-19569658 FORWARD LENGTH=181	3e-14	64.52	GO:0030001	metal ion transport	GO:0046872	metal ion binding	GO:0005634	nucleus	NA	NA	PTHR22814 PTHR22814:SF5	COPPER TRANSPORT PROTEIN ATOX1-RELATED; "UNCHARACTERIZED"	NA	NA	NA	NA	NA	NA
Glyma07g11031	81	UniRef100_UPI000233865E UPI000233865E related cluster n=1 Tax=unknown RepID=UPI000233865E	6e-13	98.77	NA	NA	NA	NA	NA	NA	NA	NA	NA	NA	NA	NA	NA	NA	NA	NA	NA	NA	NA	NA	NA	NA
Glyma07g11035	74	UniRef100_UPI00023390AE UPI00023390AE related cluster n=1 Tax=unknown RepID=UPI00023390AE	2e-21	98.65	NA	NA	NA	NA	NA	NA	NA	NA	NA	NA	NA	NA	NA	NA	NA	NA	NA	NA	NA	NA	NA	NA
Glyma07g11040	92	UniRef100_I1JKR5 Methionine aminopeptidase (Fragment) n=2 Tax=Glycine max RepID=I1JKR5_SOYBN	2e-27	63.04	UniRef100_I1JKR5 Methionine aminopeptidase (Fragment) n=2 Tax=Glycine max RepID=I1JKR5_SOYBN	2e-27	63.04	AT2G45240.1 | Symbols: MAP1A | methionine aminopeptidase 1A | chr2:18656059-18658906 FORWARD LENGTH=398	7e-27	63.04	GO:0006508 GO:0009987 GO:0010048 GO:0016485 GO:0031365 GO:0043481 GO:0048440	proteolysis; "cellular process"; "vernalization response"; "protein processing"; "N-terminal protein amino acid modification"; "anthocyanin accumulation in tissues in response to UV light"; "carpel development"	GO:0004177 GO:0008235 GO:0008270	aminopeptidase activity; "metalloexopeptidase activity"; "zinc ion binding"	GO:0005737 GO:0005829	cytoplasm; "cytosol"	PF00557	Metallopeptidase family M24	PTHR10804 PTHR10804:SF13	PROTEASE FAMILY M24 (METHIONYL AMINOPEPTIDASE, AMINOPEPTIDASE P); "gb def: aminopeptidase p [nostoc sp. pcc 7120]"	NA	NA	NA	NA	NA	NA
Glyma07g11060	67	UniRef100_UPI000233865E UPI000233865E related cluster n=1 Tax=unknown RepID=UPI000233865E	2e-38	98.51	NA	NA	NA	NA	NA	NA	NA	NA	NA	NA	NA	NA	NA	NA	NA	NA	NA	NA	NA	NA	NA	NA
Glyma07g11075	78	UniRef100_UPI00023390AE UPI00023390AE related cluster n=1 Tax=unknown RepID=UPI00023390AE	5e-11	51.28	NA	NA	NA	NA	NA	NA	NA	NA	NA	NA	NA	NA	NA	NA	NA	NA	NA	NA	NA	NA	NA	NA
Glyma07g11091	77	UniRef100_C6T2J9 Putative uncharacterized protein (Fragment) n=1 Tax=Glycine max RepID=C6T2J9_SOYBN	1e-17	51.95	NA	NA	NA	NA	NA	NA	NA	NA	NA	NA	NA	NA	NA	NA	NA	NA	NA	NA	NA	NA	NA	NA
Glyma07g11105	179	UniRef100_UPI000233BE3A UPI000233BE3A related cluster n=1 Tax=unknown RepID=UPI000233BE3A	8e-69	86.03	UniRef100_B9SP45 Eukaryotic translation initiation factor 2c, putative n=1 Tax=Ricinus communis RepID=B9SP45_RICCO	3e-33	48.6	AT2G27040.2 | Symbols: AGO4 | Argonaute family protein | chr2:11536795-11541503 REVERSE LENGTH=924	5e-33	89.94	GO:0000023 GO:0000226 GO:0000724 GO:0000911 GO:0006260 GO:0006261 GO:0006275 GO:0006306 GO:0006342 GO:0006346 GO:0007267 GO:0008283 GO:0009555 GO:0009616 GO:0009816 GO:0009855 GO:0009909 GO:0009965 GO:0010014 GO:0010073 GO:0010267 GO:0016246 GO:0016444 GO:0016458 GO:0016568 GO:0016569 GO:0016570 GO:0016572 GO:0019252 GO:0022402 GO:0030422 GO:0031047 GO:0031048 GO:0034968 GO:0035196 GO:0043085 GO:…	maltose metabolic process; "microtubule cytoskeleton organization"; "double-strand break repair via homologous recombination"; "cytokinesis by cell plate formation"; "DNA replication"; "DNA-dependent DNA replication"; "regulation of DNA replication"; "DNA methylation"; "chromatin silencing"; "methylation-dependent chromatin silencing"; "cell-cell signaling"; "cell proliferation"; "pollen developm…	GO:0005515 GO:0035197	protein binding; "siRNA binding"	GO:0005634 GO:0005719 GO:0005730 GO:0015030	nucleus; "nuclear euchromatin"; "nucleolus"; "Cajal body"	PF05687 PF08699	Plant protein of unknown function (DUF822); "Domain of unknown function (DUF1785)"	PTHR22891	EUKARYOTIC TRANSLATION INITIATION FACTOR 2C	NA	NA	NA	NA	NA	NA
Glyma07g11121	120	UniRef100_Q69F85 Gag-pol polyprotein n=1 Tax=Phaseolus vulgaris RepID=Q69F85_PHAVU	1e-22	98.33	UniRef100_Q69F85 Gag-pol polyprotein n=1 Tax=Phaseolus vulgaris RepID=Q69F85_PHAVU	1e-22	98.33	NA	NA	NA	NA	NA	NA	NA	NA	NA	NA	NA	NA	NA	NA	NA	NA	NA	NA	NA
Glyma07g11135	758	UniRef100_UPI0002339216 UPI0002339216 related cluster n=1 Tax=unknown RepID=UPI0002339216	0	99.74	UniRef100_G7KM62 Poly(A) polymerase n=1 Tax=Medicago truncatula RepID=G7KM62_MEDTR	0	99.87	AT1G17980.1 | Symbols: PAPS1 | poly(A) polymerase 1 | chr1:6187742-6191418 REVERSE LENGTH=713	0	98.81	GO:0006351 GO:0006396 GO:0022402 GO:0031123 GO:0043631	transcription, DNA-dependent; "RNA processing"; "cell cycle process"; "RNA 3'-end processing"; "RNA polyadenylation"	GO:0003723 GO:0004652 GO:0005515 GO:0016779	RNA binding; "polynucleotide adenylyltransferase activity"; "protein binding"; "nucleotidyltransferase activity"	GO:0005634	nucleus	PF01909 PF04928 PF04926	Nucleotidyltransferase domain; "Poly(A) polymerase central domain"; "Poly(A) polymerase predicted RNA binding domain"	PTHR10682 PTHR10682:SF5	POLY(A) POLYMERASE; "POLY(A) POLYMERASE-RELATED"	KOG2245	Poly(A)_polymerase_and_related_nucleotidyltransferases	2.7.7.19	Polynucleotide_adenylyltransferase	K14376	poly(A)_polymerase_[EC:2.7.7.19]
Glyma07g11150	34	NA	NA	NA	NA	NA	NA	NA	NA	NA	NA	NA	NA	NA	NA	NA	NA	NA	NA	NA	NA	NA	NA	NA	NA	NA
Glyma07g11160	298	UniRef100_I1KJ25 Uncharacterized protein n=1 Tax=Glycine max RepID=I1KJ25_SOYBN	0	99.66	UniRef100_Q7XST6 OSJNBa0039K24.20 protein n=2 Tax=Oryza sativa Japonica Group RepID=Q7XST6_ORYSJ	8e-116	99.33	AT1G45688.1 | Symbols: | unknown protein; FUNCTIONS IN: molecular_function unknown; INVOLVED IN: biological_process unknown; LOCATED IN: plasma membrane; EXPRESSED IN: 22 plant structures; EXPRESSED DURING: 13 growth stages; BEST Arabidopsis thaliana protein match is: unknown protein (TAIR:AT5G42860.1); Has 258 Blast hits to 242 proteins in 39 species: Archae - 0; Bacteria - 11; Metazoa - 10; Fun…	3e-124	98.99	GO:0008150 GO:0048767	biological process; "root hair elongation"	GO:0003674	molecular function	GO:0005886 GO:0009507	plasma membrane; "chloroplast"	PF03168	Late embryogenesis abundant protein	NA	NA	NA	NA	NA	NA	NA	NA
Glyma07g11180	371	UniRef100_I1KJ26 Uncharacterized protein n=1 Tax=Glycine max RepID=I1KJ26_SOYBN	0	99.73	UniRef100_B9SFV3 Oxidoreductase, putative n=1 Tax=Ricinus communis RepID=B9SFV3_RICCO	0	96.77	AT3G18210.2 | Symbols: | 2-oxoglutarate (2OG) and Fe(II)-dependent oxygenase superfamily protein | chr3:6238264-6240396 REVERSE LENGTH=394	0	96.23	GO:0055114	oxidation-reduction process	GO:0005506 GO:0016705 GO:0031418	iron ion binding; "oxidoreductase activity, acting on paired donors, with incorporation or reduction of molecular oxygen"; "L-ascorbic acid binding"	GO:0005634	nucleus	PF03171	2OG-Fe(II) oxygenase superfamily	PTHR24014	FAMILY NOT NAMED	KOG1971	Lysyl_hydroxylase	NA	NA	NA	NA
Glyma07g11201	252	UniRef100_UPI0002339217 UPI0002339217 related cluster n=1 Tax=unknown RepID=UPI0002339217	2e-106	61.11	UniRef100_Q0J2R1 Probable protein phosphatase 2C 67 n=4 Tax=Oryza RepID=P2C67_ORYSJ	8e-69	61.11	AT1G18030.2 | Symbols: | Protein phosphatase 2C family protein | chr1:6204400-6206336 FORWARD LENGTH=305	8e-68	61.11	NA	NA	GO:0003824 GO:0004722	catalytic activity; "protein serine/threonine phosphatase activity"	GO:0005737	cytoplasm	PF00481	Protein phosphatase 2C	PTHR13832 PTHR13832:SF89	PROTEIN PHOSPHATASE 2C; "PROTEIN PHOSPHATASE 2C"	NA	NA	NA	NA	NA	NA
Glyma07g11220	360	UniRef100_I1KJ28 Uncharacterized protein n=1 Tax=Glycine max RepID=I1KJ28_SOYBN	0	99.72	UniRef100_G7KM50 Auxin-induced protein 5NG4 n=1 Tax=Medicago truncatula RepID=G7KM50_MEDTR	0	99.72	AT3G18200.1 | Symbols: | nodulin MtN21 /EamA-like transporter family protein | chr3:6234509-6236059 REVERSE LENGTH=360	8e-173	97.5	NA	NA	GO:0003674	molecular function	GO:0009507 GO:0016020	chloroplast; "membrane"	PF00892	EamA-like transporter family	NA	NA	NA	NA	NA	NA	NA	NA
Glyma07g11240	470	UniRef100_I1KJ29 Uncharacterized protein n=1 Tax=Glycine max RepID=I1KJ29_SOYBN	0	99.79	UniRef100_G7LCG8 Protein TRANSPARENT TESTA n=1 Tax=Medicago truncatula RepID=G7LCG8_MEDTR	2e-177	95.96	AT5G52450.1 | Symbols: | MATE efflux family protein | chr5:21289042-21291749 REVERSE LENGTH=486	2e-179	97.02	GO:0006855 GO:0009624 GO:0055085	drug transmembrane transport; "response to nematode"; "transmembrane transport"	GO:0005215 GO:0015238 GO:0015297	transporter activity; "drug transmembrane transporter activity"; "antiporter activity"	GO:0005774 GO:0005886 GO:0016020	vacuolar membrane; "plasma membrane"; "membrane"	PF01554	MatE	PTHR11206 PTHR11206:SF51	MULTIDRUG RESISTANCE PUMP; "DNA DAMAGE-INDUCIBLE PROTEIN"	KOG1347	Uncharacterized_membrane_protein,_predicted_efflux_pump	NA	NA	NA	NA
Glyma07g11250	468	UniRef100_I1KJ30 Uncharacterized protein n=1 Tax=Glycine max RepID=I1KJ30_SOYBN	0	99.79	UniRef100_Q9FHB6 Mate efflux domain-containing protein n=1 Tax=Arabidopsis thaliana RepID=Q9FHB6_ARATH	3e-173	94.87	AT5G52450.1 | Symbols: | MATE efflux family protein | chr5:21289042-21291749 REVERSE LENGTH=486	5e-176	94.87	GO:0006855 GO:0009624 GO:0055085	drug transmembrane transport; "response to nematode"; "transmembrane transport"	GO:0005215 GO:0015238 GO:0015297	transporter activity; "drug transmembrane transporter activity"; "antiporter activity"	GO:0005774 GO:0005886 GO:0016020	vacuolar membrane; "plasma membrane"; "membrane"	PF01554	MatE	PTHR11206 PTHR11206:SF51	MULTIDRUG RESISTANCE PUMP; "DNA DAMAGE-INDUCIBLE PROTEIN"	KOG1347	Uncharacterized_membrane_protein,_predicted_efflux_pump	NA	NA	NA	NA
Glyma07g11270	393	UniRef100_UPI0002338E64 UPI0002338E64 related cluster n=1 Tax=unknown RepID=UPI0002338E64	2e-179	97.46	UniRef100_Q9FHB6 Mate efflux domain-containing protein n=1 Tax=Arabidopsis thaliana RepID=Q9FHB6_ARATH	2e-111	94.66	AT5G52450.1 | Symbols: | MATE efflux family protein | chr5:21289042-21291749 REVERSE LENGTH=486	5e-114	94.66	GO:0006855 GO:0009624 GO:0055085	drug transmembrane transport; "response to nematode"; "transmembrane transport"	GO:0005215 GO:0015238 GO:0015297	transporter activity; "drug transmembrane transporter activity"; "antiporter activity"	GO:0005774 GO:0005886 GO:0016020	vacuolar membrane; "plasma membrane"; "membrane"	PF01554	MatE	PTHR11206 PTHR11206:SF51	MULTIDRUG RESISTANCE PUMP; "DNA DAMAGE-INDUCIBLE PROTEIN"	NA	NA	NA	NA	NA	NA
Glyma07g11280	393	UniRef100_UPI0002338663 UPI0002338663 related cluster n=1 Tax=unknown RepID=UPI0002338663	0	99.49	UniRef100_Q947K6 CDK-activating kinase n=1 Tax=Medicago sativa subsp. x varia RepID=Q947K6_MEDSV	0	99.49	AT1G73690.1 | Symbols: CDKD1;1, AT;CDKD;1, CAK3AT | cyclin-dependent kinase D1;1 | chr1:27715113-27717018 FORWARD LENGTH=398	0	97.71	GO:0000278 GO:0000394 GO:0006366 GO:0006468 GO:0010440 GO:0030154 GO:0042023 GO:0045736 GO:0051726	mitotic cell cycle; "RNA splicing, via endonucleolytic cleavage and ligation"; "transcription from RNA polymerase II promoter"; "protein phosphorylation"; "stomatal lineage progression"; "cell differentiation"; "DNA endoreduplication"; "negative regulation of cyclin-dependent protein kinase activity"; "regulation of cell cycle"	GO:0004672 GO:0004674 GO:0005515 GO:0005524 GO:0016301 GO:0016772	protein kinase activity; "protein serine/threonine kinase activity"; "protein binding"; "ATP binding"; "kinase activity"; "transferase activity, transferring phosphorus-containing groups"	GO:0005634	nucleus	PF00069	Protein kinase domain	PTHR24056 PTHR24056:SF93	CELL DIVISION PROTEIN KINASE; "SERINE/THREONINE-PROTEIN KINASE SSN"	KOG0659	Cdk_activating_kinase_(CAK)/RNA_polymerase_II_transcription_initiation/nucleotide_excision_repair_factor_TFIIH/TFIIK,_kinase_subunit_CDK7	NA	NA	NA	NA
Glyma07g11290	309	UniRef100_I1KJ33 Uncharacterized protein n=1 Tax=Glycine max RepID=I1KJ33_SOYBN	3e-167	99.68	UniRef100_G7KKQ1 Pentatricopeptide repeat-containing protein n=1 Tax=Medicago truncatula RepID=G7KKQ1_MEDTR	2e-107	99.68	AT1G62680.1 | Symbols: | Pentatricopeptide repeat (PPR) superfamily protein | chr1:23208247-23209893 REVERSE LENGTH=548	6e-62	99.68	NA	NA	NA	NA	GO:0005739	mitochondrion	PF01535	PPR repeat	PTHR24015	FAMILY NOT NAMED	NA	NA	NA	NA	NA	NA
Glyma07g11300	343	UniRef100_I1KJ34 Uncharacterized protein n=1 Tax=Glycine max RepID=I1KJ34_SOYBN	0	99.71	UniRef100_G8A0D6 GPI-anchored protein, putative n=1 Tax=Medicago truncatula RepID=G8A0D6_MEDTR	9e-138	99.13	AT3G18050.1 | Symbols: | unknown protein; BEST Arabidopsis thaliana protein match is: unknown protein (TAIR:AT4G28100.1); Has 67 Blast hits to 66 proteins in 12 species: Archae - 0; Bacteria - 0; Metazoa - 0; Fungi - 0; Plants - 67; Viruses - 0; Other Eukaryotes - 0 (source: NCBI BLink). | chr3:6180931-6182593 FORWARD LENGTH=335	6e-108	85.42	GO:0008150 GO:0009740 GO:0010162	biological process; "gibberellic acid mediated signaling pathway"; "seed dormancy process"	GO:0003674	molecular function	GO:0005886 GO:0031225	plasma membrane; "anchored to membrane"	NA	NA	NA	NA	NA	NA	NA	NA	NA	NA
Glyma07g11310	516	UniRef100_I1KJ35 Uncharacterized protein n=1 Tax=Glycine max RepID=I1KJ35_SOYBN	0	99.81	UniRef100_B9T4F7 Beta-glucosidase, putative n=1 Tax=Ricinus communis RepID=B9T4F7_RICCO	0	98.45	AT3G18080.1 | Symbols: BGLU44 | B-S glucosidase 44 | chr3:6191586-6194124 FORWARD LENGTH=512	0	94.19	GO:0005975	carbohydrate metabolic process	GO:0003824 GO:0004553 GO:0004567 GO:0008422 GO:0043169 GO:0047668 GO:0080079 GO:0080081 GO:0080082 GO:0080083	catalytic activity; "hydrolase activity, hydrolyzing O-glycosyl compounds"; "beta-mannosidase activity"; "beta-glucosidase activity"; "cation binding"; "amygdalin beta-glucosidase activity"; "cellobiose glucosidase activity"; "4-methylumbelliferyl-beta-D-glucopyranoside beta-glucosidase activity"; "esculin beta-glucosidase activity"; "beta-gentiobiose beta-glucosidase activity"	GO:0005618 GO:0009505 GO:0009507 GO:0022626	cell wall; "plant-type cell wall"; "chloroplast"; "cytosolic ribosome"	PF00232	Glycosyl hydrolase family 1	PTHR10353	GLYCOSIDE HYDROLASES	KOG0626	Beta-glucosidase,_lactase_phlorizinhydrolase,_and_related_proteins	3.2.1.21	Beta-glucosidase	K05350	beta-glucosidase_[EC:3.2.1.21]
Glyma07g11320	576	UniRef100_UPI000233921A UPI000233921A related cluster n=1 Tax=unknown RepID=UPI000233921A	0	99.83	UniRef100_B9SU84 Exonuclease, putative n=1 Tax=Ricinus communis RepID=B9SU84_RICCO	0	99.83	AT1G18090.1 | Symbols: | 5'-3' exonuclease family protein | chr1:6224539-6227715 FORWARD LENGTH=577	0	78.3	GO:0006281	DNA repair	GO:0003677 GO:0003824 GO:0004518 GO:0016788	DNA binding; "catalytic activity"; "nuclease activity"; "hydrolase activity, acting on ester bonds"	GO:0005634	nucleus	PF00867 PF00752	XPG I-region; "XPG N-terminal domain"	PTHR11081 PTHR11081:SF8	XP-G/RAD2 DNA REPAIR ENDONUCLEASE FAMILY; "RAD2-RELATED"	KOG2518	5'-3'_exonuclease	NA	NA	NA	NA
Glyma07g11330	969	UniRef100_UPI000233921B UPI000233921B related cluster n=1 Tax=unknown RepID=UPI000233921B	0	99.9	UniRef100_G8A0D0 Myb-like DNA-binding protein BAS1 n=1 Tax=Medicago truncatula RepID=G8A0D0_MEDTR	0	98.66	AT3G18100.1 | Symbols: MYB4R1, AtMYB4R1 | myb domain protein 4r1 | chr3:6200689-6204583 FORWARD LENGTH=847	2e-173	61.92	GO:0006355 GO:0009688	regulation of transcription, DNA-dependent; "abscisic acid biosynthetic process"	GO:0003677 GO:0003700	DNA binding; "sequence-specific DNA binding transcription factor activity"	GO:0005634	nucleus	PF00249	Myb-like DNA-binding domain	PTHR10641 PTHR10641:SF30	MYB-RELATED; "MYB-RELATED TRANSCRIPTION FACTOR"	NA	NA	NA	NA	K09422	myb_proto-oncogene_protein,_plant
Glyma07g11340	341	UniRef100_I1KJ39 Uncharacterized protein n=1 Tax=Glycine max RepID=I1KJ39_SOYBN	0	99.71	UniRef100_Q9C4Z6 Guanine nucleotide-binding protein subunit beta-like protein B n=1 Tax=Arabidopsis thaliana RepID=GPLPB_ARATH	3e-131	98.24	AT1G48630.1 | Symbols: RACK1B_AT | receptor for activated C kinase 1B | chr1:17981977-17983268 REVERSE LENGTH=326	6e-134	98.24	GO:0001510 GO:0006417 GO:0009165 GO:0009220 GO:0009664 GO:0009845 GO:0042254 GO:0042545 GO:0048364 GO:0048367 GO:0071215	RNA methylation; "regulation of translation"; "nucleotide biosynthetic process"; "pyrimidine ribonucleotide biosynthetic process"; "plant-type cell wall organization"; "seed germination"; "ribosome biogenesis"; "cell wall modification"; "root development"; "shoot development"; "cellular response to abscisic acid stimulus"	GO:0000166	nucleotide binding	GO:0005634 GO:0005737 GO:0005829 GO:0022626	nucleus; "cytoplasm"; "cytosol"; "cytosolic ribosome"	PF00400	WD domain, G-beta repeat	PTHR19868	RECEPTOR FOR ACTIVATED PROTEIN KINASE C (RACK1)	KOG0279	G_protein_beta_subunit-like_protein	NA	NA	NA	NA
Glyma07g11360	59	NA	NA	NA	NA	NA	NA	NA	NA	NA	NA	NA	NA	NA	NA	NA	NA	NA	NA	NA	NA	NA	NA	NA	NA	NA
qOil-8-3
Glyma08g14880	494	UniRef100_I1KT84 Uncharacterized protein n=1 Tax=Glycine max RepID=I1KT84_SOYBN	0	99.8	UniRef100_G7LB94 Cytochrome P450 n=1 Tax=Medicago truncatula RepID=G7LB94_MEDTR	0	99.6	AT3G26300.1 | Symbols: CYP71B34 | cytochrome P450, family 71, subfamily B, polypeptide 34 | chr3:9639199-9640866 REVERSE LENGTH=500	1e-129	95.34	GO:0055114	oxidation-reduction process	GO:0005506 GO:0009055 GO:0016705 GO:0019825 GO:0020037	iron ion binding; "electron carrier activity"; "oxidoreductase activity, acting on paired donors, with incorporation or reduction of molecular oxygen"; "oxygen binding"; "heme binding"	NA	NA	PF00067	Cytochrome P450	PTHR24298 PTHR24298:SF44	FAMILY NOT NAMED; ""	KOG0156	Cytochrome_P450_CYP2_subfamily	NA	NA	NA	NA
Glyma08g14890	501	UniRef100_UPI0001BA852E UPI0001BA852E related cluster n=1 Tax=unknown RepID=UPI0001BA852E	0	99.8	UniRef100_G7LB94 Cytochrome P450 n=1 Tax=Medicago truncatula RepID=G7LB94_MEDTR	0	97.41	AT5G07990.1 | Symbols: TT7, CYP75B1, D501 | Cytochrome P450 superfamily protein | chr5:2560437-2562859 FORWARD LENGTH=513	5e-129	97.21	GO:0009411 GO:0009718 GO:0009733 GO:0009744 GO:0009813 GO:0010224 GO:0055114	response to UV; "anthocyanin-containing compound biosynthetic process"; "response to auxin stimulus"; "response to sucrose stimulus"; "flavonoid biosynthetic process"; "response to UV-B"; "oxidation-reduction process"	GO:0005506 GO:0009055 GO:0016705 GO:0016711 GO:0019825 GO:0020037	iron ion binding; "electron carrier activity"; "oxidoreductase activity, acting on paired donors, with incorporation or reduction of molecular oxygen"; "flavonoid 3'-monooxygenase activity"; "oxygen binding"; "heme binding"	GO:0005576	extracellular region	PF00067	Cytochrome P450	PTHR24298 PTHR24298:SF44	FAMILY NOT NAMED; ""	KOG0156	Cytochrome_P450_CYP2_subfamily	NA	NA	NA	NA
Glyma08g14900	499	UniRef100_I1KT86 Uncharacterized protein n=1 Tax=Glycine max RepID=I1KT86_SOYBN	0	99.8	UniRef100_G7IJ93 Cytochrome P450 n=1 Tax=Medicago truncatula RepID=G7IJ93_MEDTR	0	94.39	AT4G36220.1 | Symbols: FAH1, CYP84A1 | ferulic acid 5-hydroxylase 1 | chr4:17137584-17139619 REVERSE LENGTH=520	1e-127	92.79	GO:0009699 GO:0009809 GO:0010224 GO:0055114	phenylpropanoid biosynthetic process; "lignin biosynthetic process"; "response to UV-B"; "oxidation-reduction process"	GO:0004497 GO:0005506 GO:0009055 GO:0016705 GO:0020037 GO:0046424	monooxygenase activity; "iron ion binding"; "electron carrier activity"; "oxidoreductase activity, acting on paired donors, with incorporation or reduction of molecular oxygen"; "heme binding"; "ferulate 5-hydroxylase activity"	GO:0005783	endoplasmic reticulum	PF00067	Cytochrome P450	PTHR24298 PTHR24298:SF44	FAMILY NOT NAMED; ""	KOG0156	Cytochrome_P450_CYP2_subfamily	NA	NA	NA	NA
Glyma08g14910	652	UniRef100_I1KT87 Uncharacterized protein (Fragment) n=2 Tax=Glycine max RepID=I1KT87_SOYBN	0	97.55	UniRef100_B9T1C4 Pentatricopeptide repeat-containing protein, putative n=1 Tax=Ricinus communis RepID=B9T1C4_RICCO	0	67.94	AT4G19191.1 | Symbols: | Tetratricopeptide repeat (TPR)-like superfamily protein | chr4:10496228-10498192 FORWARD LENGTH=654	0	98.16	NA	NA	NA	NA	NA	NA	PF01535	PPR repeat	PTHR24015 PTHR24015:SF33	FAMILY NOT NAMED; "UNKNOWN PROTEIN"	NA	NA	NA	NA	NA	NA
Glyma08g14915	78	UniRef100_G7LB95 Putative uncharacterized protein n=1 Tax=Medicago truncatula RepID=G7LB95_MEDTR	1e-22	98.72	NA	NA	NA	NA	NA	NA	NA	NA	NA	NA	NA	NA	NA	NA	NA	NA	NA	NA	NA	NA	NA	NA
Glyma08g14920	758	UniRef100_I1KT88 Uncharacterized protein n=1 Tax=Glycine max RepID=I1KT88_SOYBN	0	99.87	UniRef100_G7LB96 ABC transporter-like protein n=1 Tax=Medicago truncatula RepID=G7LB96_MEDTR	0	99.87	AT5G64940.2 | Symbols: ATATH13, ATH13 | ABC2 homolog 13 | chr5:25949116-25953326 FORWARD LENGTH=761	0	97.36	GO:0006810	transport	GO:0005215 GO:0016772	transporter activity; "transferase activity, transferring phosphorus-containing groups"	GO:0005886 GO:0009507 GO:0009941	plasma membrane; "chloroplast"; "chloroplast envelope"	PF03109	ABC1 family	PTHR10566 PTHR10566:SF10	CHAPERONE-ACTIVITY OF BC1 COMPLEX (CABC1)-RELATED; "ABC1 - RELATED"	KOG1235	Predicted_unusual_protein_kinase	NA	NA	NA	NA
Glyma08g14931	237	UniRef100_G7LB97 Nuclear transcription factor Y subunit B-3 n=1 Tax=Medicago truncatula RepID=G7LB97_MEDTR	1e-82	94.51	UniRef100_G7LB97 Nuclear transcription factor Y subunit B-3 n=1 Tax=Medicago truncatula RepID=G7LB97_MEDTR	1e-82	94.51	AT4G14540.1 | Symbols: NF-YB3 | nuclear factor Y, subunit B3 | chr4:8344663-8345148 FORWARD LENGTH=161	9e-62	43.04	GO:0006355	regulation of transcription, DNA-dependent	GO:0003677 GO:0003700 GO:0043565	DNA binding; "sequence-specific DNA binding transcription factor activity"; "sequence-specific DNA binding"	GO:0005622 GO:0005634	intracellular; "nucleus"	PF00808	Histone-like transcription factor (CBF/NF-Y) and archaeal histone	PTHR11064 PTHR11064:SF9	TATA-BINDING PROTEIN-ASSOCIATED PHOSPHOPROTEIN; "CCAAT-BINDING TRANSCRIPTION FACTOR SUBUNIT A"	KOG0869	CCAAT-binding_factor,_subunit_A_(HAP3)	NA	NA	NA	NA
Glyma08g14940	341	UniRef100_I1KT90 Uncharacterized protein n=1 Tax=Glycine max RepID=I1KT90_SOYBN	0	99.71	UniRef100_Q4AC14 117M18_4 n=1 Tax=Brassica rapa RepID=Q4AC14_BRACM	1e-172	99.12	AT5G10010.1 | Symbols: | unknown protein; FUNCTIONS IN: molecular_function unknown; INVOLVED IN: biological_process unknown; LOCATED IN: nucleolus; EXPRESSED IN: 25 plant structures; EXPRESSED DURING: 15 growth stages; BEST Arabidopsis thaliana protein match is: unknown protein (TAIR:AT5G64910.1); Has 33260 Blast hits to 16857 proteins in 1270 species: Archae - 88; Bacteria - 3040; Metazoa - 1191…	3e-171	99.41	GO:0008150	biological process	GO:0003674	molecular function	GO:0005730 GO:0005737	nucleolus; "cytoplasm"	NA	NA	NA	NA	NA	NA	NA	NA	NA	NA
Glyma08g14946	125	UniRef100_I1MTY1 Uncharacterized protein n=1 Tax=Glycine max RepID=I1MTY1_SOYBN	3e-20	84.8	NA	NA	NA	NA	NA	NA	NA	NA	NA	NA	NA	NA	NA	NA	NA	NA	NA	NA	NA	NA	NA	NA
Glyma08g14953	155	UniRef100_I1K4P6 Uncharacterized protein n=1 Tax=Glycine max RepID=I1K4P6_SOYBN	1e-68	99.35	NA	NA	NA	AT5G64880.1 | Symbols: | unknown protein; Has 30201 Blast hits to 17322 proteins in 780 species: Archae - 12; Bacteria - 1396; Metazoa - 17338; Fungi - 3422; Plants - 5037; Viruses - 0; Other Eukaryotes - 2996 (source: NCBI BLink). | chr5:25932353-25933874 FORWARD LENGTH=171	1e-11	98.06	GO:0006914 GO:0008150	autophagy; "biological process"	GO:0003674	molecular function	NA	NA	NA	NA	NA	NA	NA	NA	NA	NA	NA	NA
Glyma08g14960	198	UniRef100_I1KT92 Uncharacterized protein n=1 Tax=Glycine max RepID=I1KT92_SOYBN	3e-142	99.49	UniRef100_B9H5A9 Stress enhanced protein 2 n=1 Tax=Populus trichocarpa RepID=B9H5A9_POPTR	1e-88	97.47	AT2G21970.1 | Symbols: SEP2 | stress enhanced protein 2 | chr2:9357188-9357874 REVERSE LENGTH=202	2e-73	98.99	GO:0009765	photosynthesis, light harvesting	GO:0016168	chlorophyll binding	GO:0009507 GO:0009535	chloroplast; "chloroplast thylakoid membrane"	NA	NA	NA	NA	NA	NA	NA	NA	NA	NA
Glyma08g14970	364	UniRef100_I1KT93 Uncharacterized protein n=1 Tax=Glycine max RepID=I1KT93_SOYBN	0	90.11	UniRef100_Q01HX3 OSIGBa0138H21-OSIGBa0138E01.2 protein n=4 Tax=Oryza sativa RepID=Q01HX3_ORYSA	1e-179	78.02	AT2G21960.1 | Symbols: | unknown protein; LOCATED IN: chloroplast; EXPRESSED IN: 22 plant structures; EXPRESSED DURING: 13 growth stages; BEST Arabidopsis thaliana protein match is: unknown protein (TAIR:AT1G56180.1); Has 224 Blast hits to 222 proteins in 59 species: Archae - 0; Bacteria - 65; Metazoa - 0; Fungi - 0; Plants - 134; Viruses - 0; Other Eukaryotes - 25 (source: NCBI BLink). | chr2:93…	7e-167	77.75	GO:0006098	pentose-phosphate shunt	NA	NA	GO:0009507 GO:0009534	chloroplast; "chloroplast thylakoid"	NA	NA	NA	NA	NA	NA	NA	NA	NA	NA
Glyma08g14980	296	UniRef100_I1KT94 Uncharacterized protein n=1 Tax=Glycine max RepID=I1KT94_SOYBN	0	99.66	UniRef100_B9VU88 Shikimate kinase n=2 Tax=Vitis vinifera RepID=B9VU88_VITVI	2e-123	97.97	AT2G21940.4 | Symbols: SK1, ATSK1 | shikimate kinase 1 | chr2:9351106-9352881 FORWARD LENGTH=304	3e-112	81.08	GO:0006744 GO:0019632	ubiquinone biosynthetic process; "shikimate metabolic process"	GO:0004765 GO:0005524	shikimate kinase activity; "ATP binding"	GO:0009507	chloroplast	PF01202	Shikimate kinase	PTHR21087	SHIKIMATE KINASE	NA	NA	2.7.1.71	Shikimate_kinase	K00891	shikimate_kinase_[EC:2.7.1.71]
Glyma08g14990	851	UniRef100_I1KT96 Uncharacterized protein n=2 Tax=Glycine max RepID=I1KT96_SOYBN	0	88.13	UniRef100_G7LHB8 Pentatricopeptide repeat-containing protein n=1 Tax=Medicago truncatula RepID=G7LHB8_MEDTR	0	98	AT4G39530.1 | Symbols: | Tetratricopeptide repeat (TPR)-like superfamily protein | chr4:18374736-18377240 REVERSE LENGTH=834	0	93.54	GO:0008150	biological process	NA	NA	GO:0005739	mitochondrion	PF01535	PPR repeat	PTHR24015 PTHR24015:SF148	FAMILY NOT NAMED; "SUBFAMILY NOT NAMED"	NA	NA	NA	NA	NA	NA
Glyma08g14995	233	UniRef100_I1KT98 Uncharacterized protein n=1 Tax=Glycine max RepID=I1KT98_SOYBN	3e-164	99.57	UniRef100_B7FH28 60S ribosomal protein L6 n=1 Tax=Medicago truncatula RepID=B7FH28_MEDTR	1e-141	99.57	AT1G74060.1 | Symbols: | Ribosomal protein L6 family protein | chr1:27850033-27851299 REVERSE LENGTH=233	2e-118	97.42	GO:0006412	translation	GO:0003735	structural constituent of ribosome	GO:0005622 GO:0005730 GO:0005737 GO:0005840 GO:0022625 GO:0022626	intracellular; "nucleolus"; "cytoplasm"; "ribosome"; "cytosolic large ribosomal subunit"; "cytosolic ribosome"	PF01159 PF03868	Ribosomal protein L6e; "Ribosomal protein L6, N-terminal domain"	PTHR10715	60S RIBOSOMAL PROTEIN L6	KOG1694	60s_ribosomal_protein_L6	NA	NA	K02934	large_subunit_ribosomal_protein_L6e
Glyma08g15000	254	UniRef100_C6SZF9 Uncharacterized protein n=2 Tax=Glycine max RepID=C6SZF9_SOYBN	1e-163	90.94	UniRef100_B7FH28 60S ribosomal protein L6 n=1 Tax=Medicago truncatula RepID=B7FH28_MEDTR	9e-138	90.94	AT1G74060.1 | Symbols: | Ribosomal protein L6 family protein | chr1:27850033-27851299 REVERSE LENGTH=233	2e-114	88.98	GO:0006412	translation	GO:0003735	structural constituent of ribosome	GO:0005622 GO:0005730 GO:0005737 GO:0005840 GO:0022625 GO:0022626	intracellular; "nucleolus"; "cytoplasm"; "ribosome"; "cytosolic large ribosomal subunit"; "cytosolic ribosome"	PF01159 PF03868	Ribosomal protein L6e; "Ribosomal protein L6, N-terminal domain"	PTHR10715	60S RIBOSOMAL PROTEIN L6	KOG1694	60s_ribosomal_protein_L6	NA	NA	K02934	large_subunit_ribosomal_protein_L6e
Glyma08g15005	73	NA	NA	NA	NA	NA	NA	NA	NA	NA	NA	NA	NA	NA	NA	NA	NA	NA	NA	NA	NA	NA	NA	NA	NA	NA
Glyma08g15010	97	UniRef100_I1KTA4 Uncharacterized protein n=1 Tax=Glycine max RepID=I1KTA4_SOYBN	3e-65	98.97	UniRef100_Q9FIB1 Emb|CAB61744.1 n=1 Tax=Arabidopsis thaliana RepID=Q9FIB1_ARATH	4e-26	86.6	AT5G09960.1 | Symbols: | FUNCTIONS IN: molecular_function unknown; INVOLVED IN: biological_process unknown; LOCATED IN: plasma membrane; EXPRESSED IN: 22 plant structures; EXPRESSED DURING: 13 growth stages; CONTAINS InterPro DOMAIN/s: RPM1-interacting protein 4, defence response (InterPro:IPR008700); BEST Arabidopsis thaliana protein match is: unknown protein (TAIR:AT5G64850.1); Has 30201 Blast …	2e-31	90.72	GO:0006661 GO:0008150	phosphatidylinositol biosynthetic process; "biological process"	GO:0003674	molecular function	GO:0005634 GO:0005886	nucleus; "plasma membrane"	PF05627	Cleavage site for pathogenic type III effector avirulence factor Avr	NA	NA	NA	NA	NA	NA	NA	NA
Glyma08g15030	62	NA	NA	NA	NA	NA	NA	NA	NA	NA	NA	NA	NA	NA	NA	NA	NA	NA	NA	NA	NA	NA	NA	NA	NA	NA
Glyma08g15035	100	UniRef100_G7LBA9 Putative uncharacterized protein n=1 Tax=Medicago truncatula RepID=G7LBA9_MEDTR	6e-30	97	NA	NA	NA	AT5G64820.1 | Symbols: | unknown protein; FUNCTIONS IN: molecular_function unknown; INVOLVED IN: biological_process unknown; LOCATED IN: endomembrane system; BEST Arabidopsis thaliana protein match is: unknown protein (TAIR:AT1G16850.1); Has 1807 Blast hits to 1807 proteins in 277 species: Archae - 0; Bacteria - 0; Metazoa - 736; Fungi - 347; Plants - 385; Viruses - 0; Other Eukaryotes - 339 (sou…	8e-13	79	GO:0008150	biological process	GO:0003674	molecular function	NA	NA	NA	NA	NA	NA	NA	NA	NA	NA	NA	NA
Glyma08g15040	334	UniRef100_I1KTA5 Uncharacterized protein n=1 Tax=Glycine max RepID=I1KTA5_SOYBN	0	99.7	UniRef100_B9T5U9 GTP-binding protein yptv3, putative n=1 Tax=Ricinus communis RepID=B9T5U9_RICCO	0	99.7	AT5G64813.1 | Symbols: LIP1 | Ras-related small GTP-binding family protein | chr5:25910836-25912625 FORWARD LENGTH=342	1e-178	99.4	GO:0006355 GO:0007264 GO:0009640 GO:0032922	regulation of transcription, DNA-dependent; "small GTPase mediated signal transduction"; "photomorphogenesis"; "circadian regulation of gene expression"	GO:0003924 GO:0005524 GO:0005525 GO:0008134	GTPase activity; "ATP binding"; "GTP binding"; "transcription factor binding"	GO:0005634 GO:0005737	nucleus; "cytoplasm"	PF00071	Ras family	PTHR24072 PTHR24072:SF276	FAMILY NOT NAMED; ""	KOG0098	GTPase_Rab2,_small_G_protein_superfamily	NA	NA	K07976	Rab_family,_other
Glyma08g15050	185	UniRef100_C6TDN9 Uncharacterized protein n=1 Tax=Glycine max RepID=C6TDN9_SOYBN	8e-134	99.46	UniRef100_Q2PJS4 WRKY6 n=1 Tax=Glycine max RepID=Q2PJS4_SOYBN	1e-132	99.46	AT5G64810.1 | Symbols: WRKY51, ATWRKY51 | WRKY DNA-binding protein 51 | chr5:25908415-25909687 FORWARD LENGTH=194	2e-38	45.41	GO:0006355 GO:0009867 GO:0042742 GO:0050832	regulation of transcription, DNA-dependent; "jasmonic acid mediated signaling pathway"; "defense response to bacterium"; "defense response to fungus"	GO:0003700 GO:0043565	sequence-specific DNA binding transcription factor activity; "sequence-specific DNA binding"	GO:0005634	nucleus	PF03106	WRKY DNA -binding domain	NA	NA	NA	NA	NA	NA	NA	NA
Glyma08g15061	137	UniRef100_I1LHS9 Uncharacterized protein n=2 Tax=Glycine max RepID=I1LHS9_SOYBN	2e-47	77.37	UniRef100_G7KDL1 GATA transcription factor n=1 Tax=Medicago truncatula RepID=G7KDL1_MEDTR	3e-27	97.08	AT3G50870.1 | Symbols: MNP, HAN, GATA18 | GATA type zinc finger transcription factor family protein | chr3:18911112-18912369 FORWARD LENGTH=295	2e-17	67.15	GO:0006355 GO:0009790 GO:0009909 GO:0048446	regulation of transcription, DNA-dependent; "embryo development"; "regulation of flower development"; "petal morphogenesis"	GO:0003700 GO:0008270 GO:0043565	sequence-specific DNA binding transcription factor activity; "zinc ion binding"; "sequence-specific DNA binding"	GO:0005634	nucleus	PF00320	GATA zinc finger	NA	NA	NA	NA	NA	NA	NA	NA
Glyma08g15070	75	NA	NA	NA	NA	NA	NA	NA	NA	NA	NA	NA	NA	NA	NA	NA	NA	NA	NA	NA	NA	NA	NA	NA	NA	NA
Glyma08g15080	208	UniRef100_I1K4R8 Uncharacterized protein n=1 Tax=Glycine max RepID=I1K4R8_SOYBN	9e-152	99.52	UniRef100_Q40211 RAB7A n=1 Tax=Lotus japonicus RepID=Q40211_LOTJA	5e-122	98.56	AT4G09720.1 | Symbols: ATRABG3A, RABG3A | RAB GTPase homolog G3A | chr4:6133101-6134959 FORWARD LENGTH=206	4e-114	98.56	GO:0006184 GO:0006886 GO:0006913 GO:0007165 GO:0007264 GO:0015031 GO:0016192	GTP catabolic process; "intracellular protein transport"; "nucleocytoplasmic transport"; "signal transduction"; "small GTPase mediated signal transduction"; "protein transport"; "vesicle-mediated transport"	GO:0003924 GO:0005525	GTPase activity; "GTP binding"	GO:0005622 GO:0005737 GO:0005774 GO:0005794 GO:0016020	intracellular; "cytoplasm"; "vacuolar membrane"; "Golgi apparatus"; "membrane"	PF00071	Ras family	PTHR24073 PTHR24073:SF260	FAMILY NOT NAMED; "SUBFAMILY NOT NAMED"	KOG0394	Ras-related_GTPase	NA	NA	K07976	Rab_family,_other
Glyma08g15090	166	UniRef100_C6SWQ3 Uncharacterized protein n=1 Tax=Glycine max RepID=C6SWQ3_SOYBN	2e-116	99.4	UniRef100_E4MXL6 mRNA, clone: RTFL01-34-D04 n=1 Tax=Eutrema halophilum RepID=E4MXL6_THEHA	2e-81	99.4	AT1G10500.1 | Symbols: ATCPISCA, CPISCA | chloroplast-localized ISCA-like protein | chr1:3460160-3461340 REVERSE LENGTH=180	1e-80	99.4	GO:0016226 GO:0042744	iron-sulfur cluster assembly; "hydrogen peroxide catabolic process"	GO:0005198 GO:0051536	structural molecule activity; "iron-sulfur cluster binding"	GO:0009507 GO:0009570	chloroplast; "chloroplast stroma"	PF01521	Iron-sulphur cluster biosynthesis	PTHR10072 PTHR10072:SF31	HES-B RELATED; "IRON-SULFUR CLUSTER ASSEMBLY PROTEIN"	KOG1120	Fe-S_cluster_biosynthesis_protein_ISA1_(contains_a_HesB-like_domain)	NA	NA	K13628	iron-sulfur_cluster_assembly_protein
Glyma08g15100	242	UniRef100_I1KTB0 Uncharacterized protein n=1 Tax=Glycine max RepID=I1KTB0_SOYBN	9e-168	99.59	UniRef100_Q9SJ12 Probable ATP synthase 24 kDa subunit, mitochondrial n=2 Tax=Arabidopsis thaliana RepID=ATP7_ARATH	8e-114	99.59	AT2G21870.1 | Symbols: MGP1 | copper ion binding;cobalt ion binding;zinc ion binding | chr2:9320456-9322618 REVERSE LENGTH=240	2e-116	99.59	GO:0006511 GO:0009555 GO:0009853 GO:0051788 GO:0080129	ubiquitin-dependent protein catabolic process; "pollen development"; "photorespiration"; "response to misfolded protein"; "proteasome core complex assembly"	GO:0005507 GO:0008270 GO:0050897	copper ion binding; "zinc ion binding"; "cobalt ion binding"	GO:0005730 GO:0005739 GO:0005753 GO:0009507 GO:0016020	nucleolus; "mitochondrion"; "mitochondrial proton-transporting ATP synthase complex"; "chloroplast"; "membrane"	NA	NA	NA	NA	NA	NA	NA	NA	NA	NA
Glyma08g15115	475	UniRef100_I1K4S1 Uncharacterized protein n=1 Tax=Glycine max RepID=I1K4S1_SOYBN	0	98.95	UniRef100_G7LBB8 Violaxanthin de-epoxidase n=1 Tax=Medicago truncatula RepID=G7LBB8_MEDTR	0	99.79	AT2G21860.1 | Symbols: | violaxanthin de-epoxidase-related | chr2:9318333-9319990 REVERSE LENGTH=522	0	94.95	GO:0008150 GO:0016126	biological process; "sterol biosynthetic process"	GO:0003674	molecular function	GO:0009507	chloroplast	PF07137	Violaxanthin de-epoxidase (VDE)	NA	NA	NA	NA	NA	NA	NA	NA
Glyma08g15130	1027	UniRef100_I1KTB3 Uncharacterized protein n=1 Tax=Glycine max RepID=I1KTB3_SOYBN	0	99.9	UniRef100_G7LBB9 N-acetyltransferase-like protein n=1 Tax=Medicago truncatula RepID=G7LBB9_MEDTR	0	62.12	AT1G10490.1 | Symbols: | Domain of unknown function (DUF1726) ;Putative ATPase (DUF699) | chr1:3453589-3459925 FORWARD LENGTH=1028	0	99.9	NA	NA	NA	NA	GO:0005634	nucleus	PF05127 PF08351	Putative ATPase (DUF699); "Domain of unknown function (DUF1726)"	PTHR10925	N-ACETYLTRANSFERASE-RELATED	KOG2036	Predicted_P-loop_ATPase_fused_to_an_acetyltransferase	2.3.1.-	Transferring_groups_other_than_amino-acyl_groups	K14521	N-acetyltransferase_10_[EC:2.3.1.-]
Glyma08g15150	327	UniRef100_I1K4S4 Uncharacterized protein n=1 Tax=Glycine max RepID=I1K4S4_SOYBN	0	99.69	UniRef100_G7LBC1 S-adenosylmethionine mitochondrial carrier protein n=2 Tax=Medicago truncatula RepID=G7LBC1_MEDTR	0	96.02	AT4G39460.2 | Symbols: SAMC1 | S-adenosylmethionine carrier 1 | chr4:18356093-18358596 REVERSE LENGTH=325	5e-175	98.47	GO:0006364 GO:0006810 GO:0006839 GO:0009658 GO:0009902 GO:0010027 GO:0010207 GO:0015805 GO:0035304 GO:0042793 GO:0045893	rRNA processing; "transport"; "mitochondrial transport"; "chloroplast organization"; "chloroplast relocation"; "thylakoid membrane organization"; "photosystem II assembly"; "S-adenosylmethionine transport"; "regulation of protein dephosphorylation"; "transcription from plastid promoter"; "positive regulation of transcription, DNA-dependent"	GO:0000095	S-adenosylmethionine transmembrane transporter activity	GO:0005739 GO:0005743 GO:0009507 GO:0009536 GO:0009941	mitochondrion; "mitochondrial inner membrane"; "chloroplast"; "plastid"; "chloroplast envelope"	PF00153	Mitochondrial carrier protein	PTHR24089 PTHR24089:SF45	FAMILY NOT NAMED; "SUBFAMILY NOT NAMED"	KOG0768	Mitochondrial_carrier_protein_PET8	NA	NA	NA	NA
Glyma08g15181	3218	UniRef100_UPI000233889F UPI000233889F related cluster n=1 Tax=unknown RepID=UPI000233889F	0	99.97	UniRef100_G7LBC4 Spatacsin n=1 Tax=Medicago truncatula RepID=G7LBC4_MEDTR	0	54.2	AT4G39420.2 | Symbols: | unknown protein; INVOLVED IN: biological_process unknown; LOCATED IN: cellular_component unknown; EXPRESSED IN: leaf; EXPRESSED DURING: LP.04 four leaves visible, LP.02 two leaves visible; Has 20 Blast hits to 19 proteins in 8 species: Archae - 0; Bacteria - 0; Metazoa - 0; Fungi - 0; Plants - 20; Viruses - 0; Other Eukaryotes - 0 (source: NCBI BLink). | chr4:18339731-183…	0	99.84	GO:0008150	biological process	NA	NA	GO:0005575	cellular component	NA	NA	PTHR13650	UNCHARACTERIZED	KOG1884	Uncharacterized_conserved_protein	NA	NA	NA	NA
Glyma08g15210	236	UniRef100_I1KTB9 Uncharacterized protein n=1 Tax=Glycine max RepID=I1KTB9_SOYBN	4e-175	99.58	UniRef100_Q2PJS2 WRKY40 n=1 Tax=Glycine max RepID=Q2PJS2_SOYBN	5e-174	99.58	AT4G39410.1 | Symbols: WRKY13, ATWRKY13 | WRKY DNA-binding protein 13 | chr4:18332937-18334789 REVERSE LENGTH=304	1e-58	76.69	GO:0006355	regulation of transcription, DNA-dependent	GO:0003700 GO:0043565	sequence-specific DNA binding transcription factor activity; "sequence-specific DNA binding"	GO:0005634	nucleus	PF03106	WRKY DNA -binding domain	NA	NA	NA	NA	NA	NA	NA	NA
Glyma08g15220	653	UniRef100_I1KTC2 Uncharacterized protein n=1 Tax=Glycine max RepID=I1KTC2_SOYBN	0	99.85	UniRef100_G7LBD0 Alkaline/neutral invertase n=1 Tax=Medicago truncatula RepID=G7LBD0_MEDTR	0	99.85	AT5G22510.1 | Symbols: INV-E, At-A/N-InvE | alkaline/neutral invertase | chr5:7474974-7477479 REVERSE LENGTH=617	0	87.9	GO:0005982 GO:0005987 GO:0048825	starch metabolic process; "sucrose catabolic process"; "cotyledon development"	GO:0003824 GO:0004564 GO:0004575	catalytic activity; "beta-fructofuranosidase activity"; "sucrose alpha-glucosidase activity"	GO:0009507	chloroplast	PF04853	Plant neutral invertase	NA	NA	NA	NA	NA	NA	NA	NA
Glyma08g15230	142	UniRef100_I1KTC3 Uncharacterized protein n=1 Tax=Glycine max RepID=I1KTC3_SOYBN	1e-96	99.3	UniRef100_Q9LFA5 Mediator of RNA polymerase II transcription subunit 28 n=1 Tax=Arabidopsis thaliana RepID=MED28_ARATH	6e-49	88.73	AT3G52860.1 | Symbols: | unknown protein; Has 86 Blast hits to 86 proteins in 36 species: Archae - 0; Bacteria - 2; Metazoa - 41; Fungi - 13; Plants - 26; Viruses - 0; Other Eukaryotes - 4 (source: NCBI BLink). | chr3:19591998-19592741 REVERSE LENGTH=156	1e-51	88.73	GO:0008150	biological process	GO:0003674	molecular function	GO:0005634 GO:0016592	nucleus; "mediator complex"	NA	NA	NA	NA	NA	NA	NA	NA	NA	NA
Glyma08g15241	99	NA	NA	NA	NA	NA	NA	NA	NA	NA	NA	NA	NA	NA	NA	NA	NA	NA	NA	NA	NA	NA	NA	NA	NA	NA
Glyma08g15250	337	UniRef100_I1K4T3 Uncharacterized protein n=1 Tax=Glycine max RepID=I1K4T3_SOYBN	0	99.7	UniRef100_G7LBD2 Membrane protein, putative n=1 Tax=Medicago truncatula RepID=G7LBD2_MEDTR	0	99.41	AT4G39390.2 | Symbols: ATNST-KT1, NST-K1 | nucleotide sugar transporter-KT 1 | chr4:18316278-18317854 FORWARD LENGTH=337	0	99.41	GO:0006863 GO:0015780 GO:0055085	purine nucleobase transport; "nucleotide-sugar transport"; "transmembrane transport"	GO:0005338	nucleotide-sugar transmembrane transporter activity	GO:0000139 GO:0005886	Golgi membrane; "plasma membrane"	PF03151	Triose-phosphate Transporter family	PTHR11132	SOLUTE CARRIER FAMILY 35	KOG1441	Glucose-6-phosphate/phosphate_and_phosphoenolpyruvate/phosphate_antiporter	NA	NA	NA	NA
Glyma08g15260	132	UniRef100_C6SWW8 Uncharacterized protein n=1 Tax=Glycine max RepID=C6SWW8_SOYBN	2e-90	99.24	UniRef100_G7LBD3 Small nuclear ribonucleoprotein Sm D3 n=1 Tax=Medicago truncatula RepID=G7LBD3_MEDTR	6e-89	99.24	AT1G20580.1 | Symbols: | Small nuclear ribonucleoprotein family protein | chr1:7128979-7130371 FORWARD LENGTH=131	3e-71	99.24	GO:0001510	RNA methylation	GO:0003674	molecular function	GO:0005634 GO:0005730 GO:0005732 GO:0005829	nucleus; "nucleolus"; "small nucleolar ribonucleoprotein complex"; "cytosol"	PF01423	LSM domain	PTHR23338	SMALL NUCLEAR RIBONUCLEOPROTEIN SM	KOG3172	Small_nuclear_ribonucleoprotein_Sm_D3	NA	NA	NA	NA
Glyma08g15270	216	UniRef100_C6T4Q4 Uncharacterized protein n=1 Tax=Glycine max RepID=C6T4Q4_SOYBN	5e-160	99.54	UniRef100_B3TM33 Holocarboxylase synthetase n=1 Tax=Elaeis guineensis RepID=B3TM33_ELAGV	9e-80	98.15	AT4G09830.1 | Symbols: | Uncharacterised conserved protein UCP009193 | chr4:6188866-6190591 FORWARD LENGTH=191	2e-57	95.83	GO:0008150	biological process	GO:0003674	molecular function	GO:0005634	nucleus	NA	NA	NA	NA	NA	NA	NA	NA	NA	NA
Glyma08g15273	158	UniRef100_I1LZR4 Uncharacterized protein n=1 Tax=Glycine max RepID=I1LZR4_SOYBN	2e-15	66.46	UniRef100_G7L2A7 Pantothenate synthetase n=1 Tax=Medicago truncatula RepID=G7L2A7_MEDTR	2e-09	75.32	NA	NA	NA	NA	NA	NA	NA	NA	NA	NA	NA	NA	NA	NA	NA	NA	NA	NA	NA
Glyma08g15276	89	NA	NA	NA	NA	NA	NA	NA	NA	NA	NA	NA	NA	NA	NA	NA	NA	NA	NA	NA	NA	NA	NA	NA	NA	NA
Glyma08g15280	219	UniRef100_I1KTC8 Uncharacterized protein (Fragment) n=1 Tax=Glycine max RepID=I1KTC8_SOYBN	6e-161	100	UniRef100_B9RJG7 Phosphoglycerate mutase, putative n=1 Tax=Ricinus communis RepID=B9RJG7_RICCO	1e-90	73.52	AT1G22170.1 | Symbols: | Phosphoglycerate mutase family protein | chr1:7826603-7828055 FORWARD LENGTH=334	2e-93	73.06	GO:0006096 GO:0008152	glycolysis; "metabolic process"	GO:0003824 GO:0016868	catalytic activity; "intramolecular transferase activity, phosphotransferases"	GO:0009507	chloroplast	PF00300	Phosphoglycerate mutase family	PTHR11931	PHOSPHOGLYCERATE MUTASE	NA	NA	NA	NA	NA	NA
Glyma08g15291	151	UniRef100_UPI0002337F65 UPI0002337F65 related cluster n=1 Tax=unknown RepID=UPI0002337F65	8e-102	99.34	UniRef100_D3YBG4 Bristled-like protein n=1 Tax=Trifolium repens RepID=D3YBG4_TRIRP	3e-52	82.12	AT5G65090.1 | Symbols: MRH3, BST1, DER4 | DNAse I-like superfamily protein | chr5:26004282-26006656 FORWARD LENGTH=529	1e-15	56.95	GO:0009827 GO:0009860 GO:0009932 GO:0010053 GO:0032957 GO:0046854 GO:0046855 GO:0048765	plant-type cell wall modification; "pollen tube growth"; "cell tip growth"; "root epidermal cell differentiation"; "inositol trisphosphate metabolic process"; "phosphatidylinositol phosphorylation"; "inositol phosphate dephosphorylation"; "root hair cell differentiation"	GO:0016787	hydrolase activity	GO:0005737	cytoplasm	NA	NA	NA	NA	NA	NA	NA	NA	NA	NA
Glyma08g15300	469	UniRef100_I1KTC9 Uncharacterized protein n=2 Tax=Glycine max RepID=I1KTC9_SOYBN	0	86.78	UniRef100_G7LC60 TSL-kinase interacting protein n=1 Tax=Medicago truncatula RepID=G7LC60_MEDTR	2e-161	99.79	AT4G39380.1 | Symbols: | BEST Arabidopsis thaliana protein match is: TSL-kinase interacting protein 1 (TAIR:AT2G36960.3); Has 80 Blast hits to 74 proteins in 15 species: Archae - 0; Bacteria - 0; Metazoa - 0; Fungi - 0; Plants - 78; Viruses - 0; Other Eukaryotes - 2 (source: NCBI BLink). | chr4:18309628-18311874 REVERSE LENGTH=518	5e-51	97.87	GO:0008150	biological process	GO:0003674	molecular function	GO:0005634	nucleus	NA	NA	NA	NA	NA	NA	NA	NA	NA	NA
Glyma08g15307	475	UniRef100_I1KTD1 Uncharacterized protein n=1 Tax=Glycine max RepID=I1KTD1_SOYBN	0	88.21	UniRef100_C5H8J1 Crossover junction endonuclease EME1B n=1 Tax=Arabidopsis thaliana RepID=EME1B_ARATH	7e-73	88	AT2G22140.1 | Symbols: ATEME1B, EME1B | essential meiotic endonuclease 1B | chr2:9414895-9418584 REVERSE LENGTH=551	2e-75	88	GO:0006259 GO:0006281 GO:0006310	DNA metabolic process; "DNA repair"; "DNA recombination"	GO:0003677 GO:0004518 GO:0004519	DNA binding; "nuclease activity"; "endonuclease activity"	GO:0005634	nucleus	PF02732	ERCC4 domain	NA	NA	NA	NA	NA	NA	NA	NA
Glyma08g15314	75	UniRef100_I1KBD6 Uncharacterized protein n=1 Tax=Glycine max RepID=I1KBD6_SOYBN	1e-19	98.67	NA	NA	NA	NA	NA	NA	NA	NA	NA	NA	NA	NA	NA	NA	NA	NA	NA	NA	NA	NA	NA	NA
Glyma08g15322	97	UniRef100_I1KTD2 Uncharacterized protein n=1 Tax=Glycine max RepID=I1KTD2_SOYBN	1e-29	52.58	NA	NA	NA	NA	NA	NA	NA	NA	NA	NA	NA	NA	NA	NA	NA	NA	NA	NA	NA	NA	NA	NA
Glyma08g15330	561	UniRef100_UPI00023388A2 UPI00023388A2 related cluster n=1 Tax=unknown RepID=UPI00023388A2	0	99.82	UniRef100_D7SW90 Ubiquitin carboxyl-terminal hydrolase n=1 Tax=Vitis vinifera RepID=D7SW90_VITVI	1e-167	92.69	AT4G39370.1 | Symbols: UBP27 | ubiquitin-specific protease 27 | chr4:18306392-18308625 FORWARD LENGTH=494	4e-109	70.59	GO:0006511	ubiquitin-dependent protein catabolic process	GO:0004221 GO:0004843	ubiquitin thiolesterase activity; "ubiquitin-specific protease activity"	GO:0005634	nucleus	PF00443	Ubiquitin carboxyl-terminal hydrolase	PTHR24006 PTHR24006:SF237	FAMILY NOT NAMED; ""	NA	NA	3.1.2.15	Ubiquitin_thiolesterase	K11851	ubiquitin_carboxyl-terminal_hydrolase_30_[EC:3.1.2.15]
Glyma08g15340	481	UniRef100_I1KTD4 Uncharacterized protein n=1 Tax=Glycine max RepID=I1KTD4_SOYBN	0	91.68	UniRef100_G7LC77 26S proteasome non-ATPase regulatory subunit n=1 Tax=Medicago truncatula RepID=G7LC77_MEDTR	0	91.48	AT5G09900.2 | Symbols: EMB2107, RPN5A, MSA | 26S proteasome regulatory subunit, putative (RPN5) | chr5:3089462-3092434 REVERSE LENGTH=442	0	91.48	GO:0000085 GO:0006094 GO:0006096 GO:0006511 GO:0006635 GO:0007275 GO:0009407 GO:0009640 GO:0009651 GO:0009793 GO:0009853 GO:0010388 GO:0042023 GO:0043161 GO:0043248 GO:0046686 GO:0051510 GO:0051788 GO:0080129	G2 phase of mitotic cell cycle; "gluconeogenesis"; "glycolysis"; "ubiquitin-dependent protein catabolic process"; "fatty acid beta-oxidation"; "multicellular organismal development"; "toxin catabolic process"; "photomorphogenesis"; "response to salt stress"; "embryo development ending in seed dormancy"; "photorespiration"; "cullin deneddylation"; "DNA endoreduplication"; "proteasomal ubiquitin-de…	GO:0003674	molecular function	GO:0000502 GO:0005634 GO:0005737 GO:0005829 GO:0008541 GO:0009506	proteasome complex; "nucleus"; "cytoplasm"; "cytosol"; "proteasome regulatory particle, lid subcomplex"; "plasmodesma"	PF01399	PCI domain	PTHR10855 PTHR10855:SF1	PROTEASOME REGULATORY SUBUNITS; "PROTEASOME REGULATORY SUBUNIT-RELATED"	KOG1498	26S_proteasome_regulatory_complex,_subunit_RPN5/PSMD12	NA	NA	K03035	26S_proteasome_regulatory_subunit_N5
Glyma08g15350	297	UniRef100_I1KTD5 Uncharacterized protein n=1 Tax=Glycine max RepID=I1KTD5_SOYBN	0	99.66	UniRef100_G7LC78 Ethylene-responsive transcription factor n=1 Tax=Medicago truncatula RepID=G7LC78_MEDTR	2e-63	68.69	AT5G61890.1 | Symbols: | Integrase-type DNA-binding superfamily protein | chr5:24852639-24853744 REVERSE LENGTH=248	2e-31	28.62	GO:0006355 GO:0006865 GO:0050832	regulation of transcription, DNA-dependent; "amino acid transport"; "defense response to fungus"	GO:0003677 GO:0003700	DNA binding; "sequence-specific DNA binding transcription factor activity"	GO:0005634	nucleus	PF00847	AP2 domain	NA	NA	NA	NA	NA	NA	NA	NA
Glyma08g15360	591	UniRef100_I1KTD6 Ribonucleoside-diphosphate reductase n=1 Tax=Glycine max RepID=I1KTD6_SOYBN	0	100	UniRef100_I1KTD6 Ribonucleoside-diphosphate reductase n=1 Tax=Glycine max RepID=I1KTD6_SOYBN	0	100	AT2G21790.1 | Symbols: R1, RNR1, CLS8, ATRNR1 | ribonucleotide reductase 1 | chr2:9293529-9297580 FORWARD LENGTH=816	0	99.83	GO:0006094 GO:0006260 GO:0006261 GO:0007010 GO:0009165 GO:0009202 GO:0010498 GO:0046686 GO:0055114	gluconeogenesis; "DNA replication"; "DNA-dependent DNA replication"; "cytoskeleton organization"; "nucleotide biosynthetic process"; "deoxyribonucleoside triphosphate biosynthetic process"; "proteasomal protein catabolic process"; "response to cadmium ion"; "oxidation-reduction process"	GO:0004748 GO:0005524	ribonucleoside-diphosphate reductase activity, thioredoxin disulfide as acceptor; "ATP binding"	GO:0005737 GO:0005971	cytoplasm; "ribonucleoside-diphosphate reductase complex"	PF02867 PF00317	Ribonucleotide reductase, barrel domain; "Ribonucleotide reductase, all-alpha domain"	PTHR11573 PTHR11573:SF6	RIBONUCLEOSIDE-DIPHOSPHATE REDUCTASE LARGE CHAIN; "RIBONUCLEOSIDE-DIPHOSPHATE REDUCTASE LARGE CHAIN"	KOG1112	Ribonucleotide_reductase,_alpha_subunit	NA	NA	NA	NA
Glyma08g15370	551	UniRef100_I1KTD7 Uncharacterized protein n=2 Tax=Glycine max RepID=I1KTD7_SOYBN	0	99.82	UniRef100_G7LC87 RNA-binding protein n=3 Tax=Medicago truncatula RepID=G7LC87_MEDTR	0	99.64	AT5G09880.1 | Symbols: | Splicing factor, CC1-like | chr5:3081646-3085179 REVERSE LENGTH=527	0	99.46	GO:0006397	mRNA processing	GO:0000166 GO:0003676 GO:0003723	nucleotide binding; "nucleic acid binding"; "RNA binding"	GO:0005634	nucleus	PF00076	RNA recognition motif. (a.k.a. RRM, RBD, or RNP domain)	PTHR24012 PTHR24012:SF293	FAMILY NOT NAMED; ""	KOG0147	Transcriptional_coactivator_CAPER_(RRM_superfamily)	NA	NA	K13091	RNA-binding_protein_39
Glyma08g15375	111	UniRef100_G7LC90 Putative uncharacterized protein n=1 Tax=Medicago truncatula RepID=G7LC90_MEDTR	3e-19	90.09	NA	NA	NA	NA	NA	NA	NA	NA	NA	NA	NA	NA	NA	NA	NA	NA	NA	NA	NA	NA	NA	NA
Glyma08g15380	1098	UniRef100_I1KTE1 Uncharacterized protein n=1 Tax=Glycine max RepID=I1KTE1_SOYBN	0	99.91	UniRef100_G7LC91 Cellulose synthase A catalytic subunit n=1 Tax=Medicago truncatula RepID=G7LC91_MEDTR	0	99.91	AT5G64740.1 | Symbols: CESA6, IXR2, E112, PRC1 | cellulose synthase 6 | chr5:25881555-25886333 FORWARD LENGTH=1084	0	99.64	GO:0000271 GO:0009664 GO:0009825 GO:0009832 GO:0009833 GO:0009932 GO:0010583 GO:0010817 GO:0016049 GO:0030243 GO:0030244 GO:0042546 GO:0043481 GO:0043622 GO:0048767 GO:0071555	polysaccharide biosynthetic process; "plant-type cell wall organization"; "multidimensional cell growth"; "plant-type cell wall biogenesis"; "primary cell wall biogenesis"; "cell tip growth"; "response to cyclopentenone"; "regulation of hormone levels"; "cell growth"; "cellulose metabolic process"; "cellulose biosynthetic process"; "cell wall biogenesis"; "anthocyanin accumulation in tissues in r…	GO:0008270 GO:0016757 GO:0016759 GO:0016760	zinc ion binding; "transferase activity, transferring glycosyl groups"; "cellulose synthase activity"; "cellulose synthase (UDP-forming) activity"	GO:0005794 GO:0005886 GO:0010005 GO:0010330 GO:0016020	Golgi apparatus; "plasma membrane"; "cortical microtubule, transverse to long axis"; "cellulose synthase complex"; "membrane"	PF03552	Cellulose synthase	PTHR13301 PTHR13301:SF1	X-BOX TRANSCRIPTION FACTOR-RELATED; "TGACG-MOTIF-BINDING FACTOR"	NA	NA	2.4.1.12	Cellulose_synthase_(UDP-forming)	K10999	cellulose_synthase_A_[EC:2.4.1.12]
Glyma08g15400	322	UniRef100_I1KTE2 Uncharacterized protein n=1 Tax=Glycine max RepID=I1KTE2_SOYBN	0	92.86	UniRef100_G7LC93 Mitogen-activated protein kinase organizer n=1 Tax=Medicago truncatula RepID=G7LC93_MEDTR	0	94.1	AT5G64730.1 | Symbols: | Transducin/WD40 repeat-like superfamily protein | chr5:25873146-25875021 FORWARD LENGTH=299	0	92.55	NA	NA	GO:0000166	nucleotide binding	GO:0005737 GO:0005834 GO:0080008	cytoplasm; "heterotrimeric G-protein complex"; "CUL4-RING ubiquitin ligase complex"	PF00400	WD domain, G-beta repeat	PTHR22842	WD40 REPEAT PROTEIN	KOG0316	Conserved_WD40_repeat-containing_protein	NA	NA	K13124	mitogen-activated_protein_kinase_organizer_1
Glyma08g15410	121	UniRef100_I1KTE3 Uncharacterized protein n=1 Tax=Glycine max RepID=I1KTE3_SOYBN	4e-64	77.69	UniRef100_G7JAV4 ECA1 protein n=1 Tax=Medicago truncatula RepID=G7JAV4_MEDTR	8e-15	66.94	AT2G21750.1 | Symbols: | Protein of unknown function (DUF1278) | chr2:9283367-9283744 REVERSE LENGTH=125	6e-25	73.55	GO:0009567 GO:0080155 GO:2000008	double fertilization forming a zygote and endosperm; "Regulation of double fertilization forming a zygote and endosperm"; "regulation of protein localization to cell surface"	GO:0003674	molecular function	GO:0005576 GO:0031982	extracellular region; "vesicle"	PF06915	Protein of unknown function (DUF1278)	NA	NA	NA	NA	NA	NA	NA	NA
Glyma08g15420	357	UniRef100_C6TB56 Uncharacterized protein n=1 Tax=Glycine max RepID=C6TB56_SOYBN	0	99.72	UniRef100_F8SMC1 Cinnamyl-alcohol dehydrogenase n=1 Tax=Glycine max RepID=F8SMC1_SOYBN	0	99.16	AT4G39330.1 | Symbols: ATCAD9, CAD9 | cinnamyl alcohol dehydrogenase 9 | chr4:18291268-18292772 FORWARD LENGTH=360	0	98.32	GO:0009809 GO:0055114	lignin biosynthetic process; "oxidation-reduction process"	GO:0000166 GO:0008270 GO:0016491 GO:0016747 GO:0045551	nucleotide binding; "zinc ion binding"; "oxidoreductase activity"; "transferase activity, transferring acyl groups other than amino-acyl groups"; "cinnamyl-alcohol dehydrogenase activity"	GO:0005737 GO:0048046	cytoplasm; "apoplast"	PF08240 PF00107	Alcohol dehydrogenase GroES-like domain; "Zinc-binding dehydrogenase"	PTHR11695 PTHR11695:SF285	ALCOHOL DEHYDROGENASE RELATED; "QUINONE OXIDOREDUCTASE-RELATED"	KOG0023	Alcohol_dehydrogenase,_class_V	1.1.1.195	Cinnamyl-alcohol_dehydrogenase	K00083	cinnamyl-alcohol_dehydrogenase_[EC:1.1.1.195]
Glyma08g15430	315	UniRef100_I1KTE5 Uncharacterized protein n=1 Tax=Glycine max RepID=I1KTE5_SOYBN	0	99.68	UniRef100_E4MVW8 mRNA, clone: RTFL01-06-O09 n=1 Tax=Eutrema halophilum RepID=E4MVW8_THEHA	7e-114	99.68	AT5G09850.1 | Symbols: | Transcription elongation factor (TFIIS) family protein | chr5:3063488-3065221 REVERSE LENGTH=353	2e-115	99.68	GO:0006351 GO:0006355	transcription, DNA-dependent; "regulation of transcription, DNA-dependent"	GO:0003677	DNA binding	GO:0005634 GO:0005829 GO:0016021	nucleus; "cytosol"; "integral to membrane"	PF08711	TFIIS helical bundle-like domain	PTHR15141 PTHR15141:SF34	ELONGIN A-RELATED; "TRANSCRIPTION ELONGATION FACTOR-RELATED"	NA	NA	NA	NA	NA	NA
Glyma08g15440	344	UniRef100_UPI0002337F6B UPI0002337F6B related cluster n=1 Tax=unknown RepID=UPI0002337F6B	0	99.71	UniRef100_G7LC96 Auxin-induced protein 5NG4 n=2 Tax=Medicago truncatula RepID=G7LC96_MEDTR	0	97.97	AT5G64700.1 | Symbols: | nodulin MtN21 /EamA-like transporter family protein | chr5:25865190-25866845 REVERSE LENGTH=359	4e-130	98.55	NA	NA	GO:0003674	molecular function	GO:0005576 GO:0016020	extracellular region; "membrane"	PF00892	EamA-like transporter family	NA	NA	NA	NA	NA	NA	NA	NA
Glyma08g15450	414	UniRef100_UPI0002337F6C UPI0002337F6C related cluster n=1 Tax=unknown RepID=UPI0002337F6C	0	99.76	UniRef100_J8RQF7 LPXTG-domain-containing protein cell wall anchor domain (Fragment) n=1 Tax=Bacillus cereus BAG2X1-2 RepID=J8RQF7_BACCE	4e-06	46.14	NA	NA	NA	NA	NA	NA	NA	NA	NA	NA	NA	NA	NA	NA	NA	NA	NA	NA	NA
Glyma08g15460	269	UniRef100_UPI0001BA6C81 UPI0001BA6C81 related cluster n=1 Tax=unknown RepID=UPI0001BA6C81	0	99.63	UniRef100_G7LC98 Fibrillin n=1 Tax=Medicago truncatula RepID=G7LC98_MEDTR	2e-148	99.26	AT5G09820.2 | Symbols: | Plastid-lipid associated protein PAP / fibrillin family protein | chr5:3056090-3057380 REVERSE LENGTH=273	7e-91	97.77	GO:0008150	biological process	GO:0005198	structural molecule activity	GO:0009507	chloroplast	PF04755	PAP fibrillin	NA	NA	NA	NA	NA	NA	NA	NA
Glyma08g15471	94	UniRef100_C6T2B7 Putative uncharacterized protein n=1 Tax=Glycine max RepID=C6T2B7_SOYBN	8e-61	98.94	UniRef100_G7LC99 BolA-like protein n=1 Tax=Medicago truncatula RepID=G7LC99_MEDTR	4e-54	98.94	AT5G09830.1 | Symbols: | BolA-like family protein | chr5:3057816-3058769 REVERSE LENGTH=93	1e-42	84.04	GO:0006301 GO:0008150	postreplication repair; "biological process"	NA	NA	GO:0005576	extracellular region	PF01722	BolA-like protein	PTHR12735	BOLA-LIKE PROTEIN-RELATED	KOG3348	BolA_(bacterial_stress-induced_morphogen)-related_protein	NA	NA	NA	NA
Glyma08g15480	378	UniRef100_I1K4W1 Uncharacterized protein n=1 Tax=Glycine max RepID=I1K4W1_SOYBN	0	99.74	UniRef100_Q9SLQ6 Actin isoform B n=2 Tax=Fabaceae RepID=Q9SLQ6_MIMPU	0	99.74	AT5G09810.1 | Symbols: ACT7 | actin 7 | chr5:3052809-3054220 FORWARD LENGTH=377	0	99.74	GO:0006007 GO:0006094 GO:0007010 GO:0009416 GO:0009611 GO:0009733 GO:0009845 GO:0010053 GO:0010498 GO:0032880 GO:0048364 GO:0048767 GO:0051301	glucose catabolic process; "gluconeogenesis"; "cytoskeleton organization"; "response to light stimulus"; "response to wounding"; "response to auxin stimulus"; "seed germination"; "root epidermal cell differentiation"; "proteasomal protein catabolic process"; "regulation of protein localization"; "root development"; "root hair elongation"; "cell division"	GO:0005200 GO:0005515 GO:0005524	structural constituent of cytoskeleton; "protein binding"; "ATP binding"	GO:0005618 GO:0005730 GO:0005737 GO:0005739 GO:0005829 GO:0005856 GO:0005886 GO:0009506 GO:0009570 GO:0009941	cell wall; "nucleolus"; "cytoplasm"; "mitochondrion"; "cytosol"; "cytoskeleton"; "plasma membrane"; "plasmodesma"; "chloroplast stroma"; "chloroplast envelope"	PF00022	Actin	PTHR11937 PTHR11937:SF77	ACTIN; "ACTIN"	KOG0676	Actin_and_related_proteins	NA	NA	K10355	actin,_other_eukaryote
Glyma08g15490	232	UniRef100_I1KTF2 Uncharacterized protein n=1 Tax=Glycine max RepID=I1KTF2_SOYBN	1e-168	99.57	UniRef100_G7LD48 RING-H2 finger protein ATL1L n=2 Tax=Medicago truncatula RepID=G7LD48_MEDTR	4e-104	99.14	AT1G49230.1 | Symbols: | RING/U-box superfamily protein | chr1:18209320-18209979 FORWARD LENGTH=219	1e-72	94.83	NA	NA	GO:0008270	zinc ion binding	NA	NA	PF00097	Zinc finger, C3HC4 type (RING finger)	PTHR22764	RING FINGER PROTEIN 11 (SID 1669) (NEDD4 WW DOMAIN-BINDING PROTEIN 2).	KOG1493	Anaphase-promoting_complex_(APC),_subunit_11	NA	NA	NA	NA
Glyma08g15500	624	UniRef100_UPI0002337F6E UPI0002337F6E related cluster n=1 Tax=unknown RepID=UPI0002337F6E	0	99.84	UniRef100_Q9LSA0 Emb|CAB62463.1 n=2 Tax=Arabidopsis thaliana RepID=Q9LSA0_ARATH	2e-142	96.79	AT3G18770.1 | Symbols: | Autophagy-related protein 13 | chr3:6460026-6462510 REVERSE LENGTH=625	7e-146	96.79	NA	NA	NA	NA	GO:0005634	nucleus	PF10033	Autophagy-related protein 13	NA	NA	KOG4573	Phosphoprotein_involved_in_cytoplasm_to_vacuole_targeting_and_autophagy	NA	NA	NA	NA
Glyma08g15515	105	UniRef100_UPI0002337F6F UPI0002337F6F related cluster n=1 Tax=unknown RepID=UPI0002337F6F	2e-60	99.05	UniRef100_G7LF25 DNA-directed RNA polymerase II subunit RPB4 n=2 Tax=Medicago truncatula RepID=G7LF25_MEDTR	4e-52	99.05	AT5G09920.1 | Symbols: RPB15.9, ATRPB15.9, RPB15.9.9, NRPB4 | RNA polymerase II, Rpb4, core protein | chr5:3096276-3097370 FORWARD LENGTH=138	4e-52	99.05	GO:0000394 GO:0006366 GO:0008152 GO:0032774	RNA splicing, via endonucleolytic cleavage and ligation; "transcription from RNA polymerase II promoter"; "metabolic process"; "RNA biosynthetic process"	GO:0000166 GO:0003824 GO:0003899	nucleotide binding; "catalytic activity"; "DNA-directed RNA polymerase activity"	GO:0005634 GO:0005665	nucleus; "DNA-directed RNA polymerase II, core complex"	PF03874	RNA polymerase Rpb4	PTHR21297	DNA-DIRECTED RNA POLYMERASE II	KOG2351	RNA_polymerase_II,_fourth_largest_subunit	NA	NA	NA	NA
Glyma08g15530	488	UniRef100_I1KTF4 Uncharacterized protein n=2 Tax=Glycine max RepID=I1KTF4_SOYBN	0	77.05	UniRef100_G7LD66 GRAS family transcription factor n=1 Tax=Medicago truncatula RepID=G7LD66_MEDTR	0	99.8	AT1G55580.1 | Symbols: LAS, SCL18 | GRAS family transcription factor | chr1:20764106-20765443 FORWARD LENGTH=445	6e-43	58.81	GO:0006355 GO:0010223	regulation of transcription, DNA-dependent; "secondary shoot formation"	GO:0003700	sequence-specific DNA binding transcription factor activity	GO:0005634	nucleus	PF03514	GRAS family transcription factor	NA	NA	NA	NA	NA	NA	NA	NA
Glyma08g15540	137	UniRef100_I1KTF5 Uncharacterized protein (Fragment) n=1 Tax=Glycine max RepID=I1KTF5_SOYBN	4e-83	92.7	UniRef100_G7LD55 DnaJ homolog subfamily C member n=1 Tax=Medicago truncatula RepID=G7LD55_MEDTR	9e-57	93.43	AT5G45420.1 | Symbols: | Duplicated homeodomain-like superfamily protein | chr5:18405668-18406597 REVERSE LENGTH=309	3e-52	92.7	GO:0048767	root hair elongation	GO:0003677 GO:0003700	DNA binding; "sequence-specific DNA binding transcription factor activity"	GO:0005634 GO:0005783 GO:0005886	nucleus; "endoplasmic reticulum"; "plasma membrane"	NA	NA	NA	NA	NA	NA	NA	NA	NA	NA
Glyma08g15560	1319	UniRef100_UPI00023389FE UPI00023389FE related cluster n=1 Tax=unknown RepID=UPI00023389FE	0	99.92	UniRef100_G7LD57 Protein BRUSHY n=1 Tax=Medicago truncatula RepID=G7LD57_MEDTR	0	84.23	AT3G18730.1 | Symbols: TSK, MGO3, BRU1 | tetratricopeptide repeat (TPR)-containing protein | chr3:6446062-6453045 REVERSE LENGTH=1311	0	98.48	GO:0000086 GO:0009933 GO:0009934 GO:0051301	G2/M transition of mitotic cell cycle; "meristem structural organization"; "regulation of meristem structural organization"; "cell division"	GO:0005515	protein binding	GO:0005634 GO:0016020	nucleus; "membrane"	NA	NA	PTHR10098 PTHR10098:SF8	RAPSYN; "RAPSYNOID"	KOG1909	Ran_GTPase-activating_protein	NA	NA	NA	NA
Glyma08g15570	78	UniRef100_I1KTF8 Uncharacterized protein n=1 Tax=Glycine max RepID=I1KTF8_SOYBN	5e-48	98.72	UniRef100_G7LD35 Protein IDA-like protein n=1 Tax=Medicago truncatula RepID=G7LD35_MEDTR	3e-24	98.72	AT5G64667.1 | Symbols: IDL2 | inflorescence deficient in abscission (IDA)-like 2 | chr5:25850797-25851084 FORWARD LENGTH=95	6e-13	66.67	NA	NA	NA	NA	NA	NA	NA	NA	NA	NA	NA	NA	NA	NA	NA	NA
Glyma08g15580	419	UniRef100_I1KTF9 Uncharacterized protein n=1 Tax=Glycine max RepID=I1KTF9_SOYBN	0	99.76	UniRef100_G7LD36 U-box domain-containing protein n=1 Tax=Medicago truncatula RepID=G7LD36_MEDTR	0	99.76	AT5G64660.1 | Symbols: ATCMPG2, CMPG2 | CYS, MET, PRO, and GLY protein 2 | chr5:25842119-25843381 REVERSE LENGTH=420	1e-144	99.76	GO:0002679 GO:0010200 GO:0016567 GO:0035556 GO:0050832	respiratory burst involved in defense response; "response to chitin"; "protein ubiquitination"; "intracellular signal transduction"; "defense response to fungus"	GO:0004842	ubiquitin-protein ligase activity	GO:0005737	cytoplasm	PF04564	U-box domain	PTHR22849	WDSAM1 PROTEIN	NA	NA	NA	NA	NA	NA
Glyma08g15591	112	UniRef100_I1KTG0 Uncharacterized protein n=1 Tax=Glycine max RepID=I1KTG0_SOYBN	5e-54	77.68	UniRef100_G7K3J3 LOB domain-containing protein n=1 Tax=Medicago truncatula RepID=G7K3J3_MEDTR	1e-19	70.54	NA	NA	NA	NA	NA	NA	NA	NA	NA	PF03195	Protein of unknown function DUF260	NA	NA	NA	NA	NA	NA	NA	NA
Glyma08g15600	547	UniRef100_UPI00023389FF UPI00023389FF related cluster n=1 Tax=unknown RepID=UPI00023389FF	0	96.89	UniRef100_G7LD74 WD repeat-containing protein n=1 Tax=Medicago truncatula RepID=G7LD74_MEDTR	0	95.06	AT1G48870.1 | Symbols: | Transducin/WD40 repeat-like superfamily protein | chr1:18072325-18074457 REVERSE LENGTH=593	2e-124	84.46	GO:0007165	signal transduction	GO:0004871 GO:0008601	signal transducer activity; "protein phosphatase type 2A regulator activity"	GO:0000159 GO:0005634 GO:0005834	protein phosphatase type 2A complex; "nucleus"; "heterotrimeric G-protein complex"	PF00400	WD domain, G-beta repeat	PTHR14221	WD REPEAT DOMAIN 44	KOG0645 KOG0286	WD40_repeat_protein G-protein_beta_subunit	NA	NA	NA	NA
Glyma08g15610	326	UniRef100_I1KTG2 Uncharacterized protein n=1 Tax=Glycine max RepID=I1KTG2_SOYBN	0	99.69	UniRef100_G7LD78 Uridylate kinase n=1 Tax=Medicago truncatula RepID=G7LD78_MEDTR	3e-172	87.73	AT3G18680.1 | Symbols: | Amino acid kinase family protein | chr3:6427533-6429520 FORWARD LENGTH=339	3e-167	77.3	GO:0006221 GO:0006364 GO:0006399 GO:0008652 GO:0009073 GO:0009658 GO:0009793 GO:0010027 GO:0010228 GO:0016226 GO:0045036 GO:0045893 GO:0048481	pyrimidine nucleotide biosynthetic process; "rRNA processing"; "tRNA metabolic process"; "cellular amino acid biosynthetic process"; "aromatic amino acid family biosynthetic process"; "chloroplast organization"; "embryo development ending in seed dormancy"; "thylakoid membrane organization"; "vegetative to reproductive phase transition of meristem"; "iron-sulfur cluster assembly"; "protein target…	GO:0009041 GO:0033862	uridylate kinase activity; "UMP kinase activity"	GO:0009507	chloroplast	PF00696	Amino acid kinase family	PTHR26059 PTHR26059:SF1	FAMILY NOT NAMED; "SUBFAMILY NOT NAMED"	NA	NA	2.7.4.22	UMP_kinase	K09903	uridylate_kinase_[EC:2.7.4.22]
Glyma08g15620	199	UniRef100_I1KTG3 Uncharacterized protein n=1 Tax=Glycine max RepID=I1KTG3_SOYBN	3e-137	99.5	UniRef100_G7LD80 Protein MKS1 n=1 Tax=Medicago truncatula RepID=G7LD80_MEDTR	3e-89	97.99	AT3G18690.1 | Symbols: MKS1 | MAP kinase substrate 1 | chr3:6429755-6430423 REVERSE LENGTH=222	1e-27	76.38	GO:0009870	defense response signaling pathway, resistance gene-dependent	GO:0005515	protein binding	GO:0005634	nucleus	PF05678	VQ motif	NA	NA	NA	NA	NA	NA	NA	NA
Glyma08g15630	266	UniRef100_I1KTG4 Uncharacterized protein n=1 Tax=Glycine max RepID=I1KTG4_SOYBN	0	99.62	UniRef100_Q9SIH9 Expressed protein n=1 Tax=Arabidopsis thaliana RepID=Q9SIH9_ARATH	2e-35	45.86	AT4G14620.1 | Symbols: | Protein of unknown function (DUF506) _x0001_| chr4:8389246-8390448 REVERSE LENGTH=341	6e-40	75.94	GO:0008150	biological process	GO:0003674	molecular function	GO:0005634	nucleus	PF04720	Protein of unknown function (DUF506)	NA	NA	NA	NA	NA	NA	NA	NA
Glyma08g15641	256	UniRef100_I1K4X8 Uncharacterized protein n=1 Tax=Glycine max RepID=I1K4X8_SOYBN	5e-144	99.61	UniRef100_B9RU18 Glycogenin, putative n=1 Tax=Ricinus communis RepID=B9RU18_RICCO	2e-79	95.31	AT3G18660.2 | Symbols: PGSIP1, GUX1 | plant glycogenin-like starch initiation protein 1 | chr3:6419211-6421959 REVERSE LENGTH=659	4e-57	94.92	GO:0005982 GO:0009058 GO:0009834 GO:0010413 GO:0010417 GO:0045492	starch metabolic process; "biosynthetic process"; "secondary cell wall biogenesis"; "glucuronoxylan metabolic process"; "glucuronoxylan biosynthetic process"; "xylan biosynthetic process"	GO:0015020 GO:0016757 GO:0080116	glucuronosyltransferase activity; "transferase activity, transferring glycosyl groups"; "glucuronoxylan glucuronosyltransferase activity"	GO:0005634 GO:0005794	nucleus; "Golgi apparatus"	NA	NA	NA	NA	NA	NA	NA	NA	NA	NA
Glyma08g15650	556	UniRef100_I1KTG6 Pectinesterase n=1 Tax=Glycine max RepID=I1KTG6_SOYBN	0	99.82	UniRef100_I1KTG6 Pectinesterase n=1 Tax=Glycine max RepID=I1KTG6_SOYBN	0	99.82	AT5G09760.1 | Symbols: | Plant invertase/pectin methylesterase inhibitor superfamily | chr5:3032446-3034364 FORWARD LENGTH=551	0	92.09	GO:0010075 GO:0042545	regulation of meristem growth; "cell wall modification"	GO:0004857 GO:0030599	enzyme inhibitor activity; "pectinesterase activity"	GO:0005618 GO:0009505 GO:0009507	cell wall; "plant-type cell wall"; "chloroplast"	PF01095 PF04043	Pectinesterase; "Plant invertase/pectin methylesterase inhibitor"	PTHR22931 PTHR22931:SF5	PHOSPHOENOLPYRUVATE DIKINASE-RELATED; "METHYLESTERASE INHIBITOR-RELATED"	NA	NA	NA	NA	NA	NA
Glyma08g15670	644	UniRef100_I1KTG7 Uncharacterized protein n=1 Tax=Glycine max RepID=I1KTG7_SOYBN	0	82.76	UniRef100_B9S7C1 Peptide transporter, putative n=1 Tax=Ricinus communis RepID=B9S7C1_RICCO	0	82.76	AT2G02040.1 | Symbols: ATPTR2-B, NTR1, PTR2-B, PTR2, ATPTR2 | peptide transporter 2 | chr2:487542-489707 FORWARD LENGTH=585	0	82.76	GO:0006857 GO:0006869 GO:0006891 GO:0010351 GO:0015833 GO:0016558 GO:0042938 GO:0042939	oligopeptide transport; "lipid transport"; "intra-Golgi vesicle-mediated transport"; "lithium ion transport"; "peptide transport"; "protein import into peroxisome matrix"; "dipeptide transport"; "tripeptide transport"	GO:0005215 GO:0015197 GO:0015334 GO:0042936 GO:0042937	transporter activity; "peptide transporter activity"; "high affinity oligopeptide transporter activity"; "dipeptide transporter activity"; "tripeptide transporter activity"	GO:0000325 GO:0005773 GO:0005774 GO:0005794 GO:0005886	plant-type vacuole; "vacuole"; "vacuolar membrane"; "Golgi apparatus"; "plasma membrane"	PF00854	POT family	PTHR11654 PTHR11654:SF37	OLIGOPEPTIDE TRANSPORTER-RELATED; "OLIGOPEPTIDE TRANSPORTER-RELATED"	KOG1237	H+/oligopeptide_symporter	NA	NA	NA	NA
Glyma08g15680	669	UniRef100_I1KTG8 Uncharacterized protein n=1 Tax=Glycine max RepID=I1KTG8_SOYBN	0	99.85	UniRef100_D2D336 Rhamnose synthase n=1 Tax=Gossypium hirsutum RepID=D2D336_GOSHI	0	99.85	AT1G78570.1 | Symbols: RHM1, ROL1, ATRHM1 | rhamnose biosynthesis 1 | chr1:29550110-29552207 FORWARD LENGTH=669	0	99.85	GO:0009225 GO:0009744 GO:0009813 GO:0010224 GO:0010253 GO:0010315 GO:0044237 GO:0045226 GO:0051555	nucleotide-sugar metabolic process; "response to sucrose stimulus"; "flavonoid biosynthetic process"; "response to UV-B"; "UDP-rhamnose biosynthetic process"; "auxin efflux"; "cellular metabolic process"; "extracellular polysaccharide biosynthetic process"; "flavonol biosynthetic process"	GO:0000166 GO:0003824 GO:0008831 GO:0010280 GO:0050377 GO:0050662	nucleotide binding; "catalytic activity"; "dTDP-4-dehydrorhamnose reductase activity"; "UDP-L-rhamnose synthase activity"; "UDP-glucose 4,6-dehydratase activity"; "coenzyme binding"	GO:0005829 GO:0009506 GO:0009507	cytosol; "plasmodesma"; "chloroplast"	PF04321 PF01370	RmlD substrate binding domain; "NAD dependent epimerase/dehydratase family"	PTHR10366 PTHR10366:SF2	NAD DEPENDENT EPIMERASE/DEHYDRATASE; "HYDROXYSTEROID DEHYDROGENASE"	KOG0747	Putative_NAD+-dependent_epimerases	4.2.1.76	UDP-glucose_4,6-dehydratase	K12450	UDP-glucose_4,6-dehydratase_[EC:4.2.1.76]
Glyma08g15700	206	UniRef100_I1KTG9 Uncharacterized protein n=1 Tax=Glycine max RepID=I1KTG9_SOYBN	4e-152	99.51	UniRef100_B9RTW1 Ccaat-binding transcription factor, putative n=1 Tax=Ricinus communis RepID=B9RTW1_RICCO	9e-51	97.09	AT1G08970.2 | Symbols: HAP5C, NF-YC9 | nuclear factor Y, subunit C9 | chr1:2883144-2883839 FORWARD LENGTH=231	5e-51	95.15	GO:0006355	regulation of transcription, DNA-dependent	GO:0003677 GO:0003700 GO:0043565	DNA binding; "sequence-specific DNA binding transcription factor activity"; "sequence-specific DNA binding"	GO:0005622 GO:0005634 GO:0005737 GO:0005829	intracellular; "nucleus"; "cytoplasm"; "cytosol"	PF00808	Histone-like transcription factor (CBF/NF-Y) and archaeal histone	PTHR10252 PTHR10252:SF6	HISTONE-LIKE TRANSCRIPTION FACTOR CCAAT-RELATED; "CCAAT-BINDING TRANSCRIPTION FACTOR"	KOG1657	CCAAT-binding_factor,_subunit_C_(HAP5)	NA	NA	NA	NA
Glyma08g15715	1836	UniRef100_UPI00023380EC UPI00023380EC related cluster n=1 Tax=unknown RepID=UPI00023380EC	0	99.95	UniRef100_B9RSI5 Spike-1, putative n=1 Tax=Ricinus communis RepID=B9RSI5_RICCO	0	98.8	AT4G16340.1 | Symbols: SPK1 | guanyl-nucleotide exchange factors;GTPase binding;GTP binding | chr4:9228773-9241060 REVERSE LENGTH=1830	0	99.89	GO:0000226 GO:0000911 GO:0006084 GO:0007020 GO:0009855 GO:0010014 GO:0010073 GO:0010075 GO:0010090 GO:0016126 GO:0016132 GO:0016192 GO:0045010 GO:0051322	microtubule cytoskeleton organization; "cytokinesis by cell plate formation"; "acetyl-CoA metabolic process"; "microtubule nucleation"; "determination of bilateral symmetry"; "meristem initiation"; "meristem maintenance"; "regulation of meristem growth"; "trichome morphogenesis"; "sterol biosynthetic process"; "brassinosteroid biosynthetic process"; "vesicle-mediated transport"; "actin nucleation…	GO:0005085 GO:0005525 GO:0051020	guanyl-nucleotide exchange factor activity; "GTP binding"; "GTPase binding"	GO:0005634 GO:0005829 GO:0005886 GO:0019898 GO:0070971	nucleus; "cytosol"; "plasma membrane"; "extrinsic to membrane"; "endoplasmic reticulum exit site"	PF06920	Dedicator of cytokinesis	PTHR23317 PTHR23317:SF8	DEDICATOR OF CYTOKINESIS (DOCK); "SPIKE-1"	KOG1997	PH_domain-containing_protein	NA	NA	NA	NA
Glyma08g15730	94	UniRef100_C6SZL5 Uncharacterized protein n=1 Tax=Glycine max RepID=C6SZL5_SOYBN	7e-60	98.94	NA	NA	NA	NA	NA	NA	NA	NA	NA	NA	NA	NA	NA	NA	NA	NA	NA	NA	NA	NA	NA	NA
Glyma08g15740	284	UniRef100_I1KTH1 Uncharacterized protein n=1 Tax=Glycine max RepID=I1KTH1_SOYBN	0	99.65	UniRef100_B9STC8 DNA binding protein, putative n=1 Tax=Ricinus communis RepID=B9STC8_RICCO	9e-104	80.99	AT3G19860.1 | Symbols: bHLH121 | basic helix-loop-helix (bHLH) DNA-binding superfamily protein | chr3:6904579-6905863 FORWARD LENGTH=284	1e-93	81.69	GO:0006635 GO:0016558	fatty acid beta-oxidation; "protein import into peroxisome matrix"	GO:0003677 GO:0003700	DNA binding; "sequence-specific DNA binding transcription factor activity"	GO:0005634	nucleus	PF00010	Helix-loop-helix DNA-binding domain	PTHR23042 PTHR23042:SF20	CIRCADIAN PROTEIN CLOCK/ARNT/BMAL/PAS; "SUBFAMILY NOT NAMED"	NA	NA	NA	NA	NA	NA
Glyma08g15750	142	UniRef100_I1KTH3 Uncharacterized protein n=1 Tax=Glycine max RepID=I1KTH3_SOYBN	2e-93	96.48	UniRef100_G7IZ80 RING finger protein n=1 Tax=Medicago truncatula RepID=G7IZ80_MEDTR	2e-17	97.89	AT1G14200.1 | Symbols: | RING/U-box superfamily protein | chr1:4854532-4855071 REVERSE LENGTH=179	3e-13	83.8	GO:0006457 GO:0009408 GO:0009644 GO:0034976 GO:0042542	protein folding; "response to heat"; "response to high light intensity"; "response to endoplasmic reticulum stress"; "response to hydrogen peroxide"	GO:0008270	zinc ion binding	GO:0005634	nucleus	PF00097	Zinc finger, C3HC4 type (RING finger)	PTHR22763	RING ZINC FINGER PROTEIN	NA	NA	NA	NA	NA	NA
Glyma08g15771	378	UniRef100_I1MJJ6 Uncharacterized protein n=1 Tax=Glycine max RepID=I1MJJ6_SOYBN	0	99.74	UniRef100_G7IJ30 Homeobox-leucine zipper protein HAT14 n=1 Tax=Medicago truncatula RepID=G7IJ30_MEDTR	2e-145	87.3	AT5G06710.1 | Symbols: HAT14 | homeobox from Arabidopsis thaliana | chr5:2068305-2070284 REVERSE LENGTH=336	8e-85	83.86	GO:0006355	regulation of transcription, DNA-dependent	GO:0003677 GO:0003700 GO:0043565	DNA binding; "sequence-specific DNA binding transcription factor activity"; "sequence-specific DNA binding"	GO:0005634	nucleus	PF02183 PF00046	Homeobox associated leucine zipper; "Homeobox domain"	PTHR24326 PTHR24326:SF218	FAMILY NOT NAMED; ""	KOG0483	Transcription_factor_HEX,_contains_HOX_and_HALZ_domains	NA	NA	NA	NA
Glyma08g15790	39	NA	NA	NA	NA	NA	NA	NA	NA	NA	NA	NA	NA	NA	NA	NA	NA	NA	NA	NA	NA	NA	NA	NA	NA	NA
Glyma08g15805	272	UniRef100_UPI0000E6498D UPI0000E6498D related cluster n=1 Tax=unknown RepID=UPI0000E6498D	2e-117	99.63	UniRef100_Q8GYK6 Proline-rich uncharacterized protein n=1 Tax=Arabidopsis thaliana RepID=Q8GYK6_ARATH	1e-44	50.37	AT2G32840.1 | Symbols: | proline-rich family protein | chr2:13933101-13934836 REVERSE LENGTH=337	2e-47	50.37	NA	NA	NA	NA	GO:0005634	nucleus	NA	NA	NA	NA	NA	NA	NA	NA	NA	NA
Glyma08g15820	330	UniRef100_I1KTH6 Uncharacterized protein n=1 Tax=Glycine max RepID=I1KTH6_SOYBN	0	99.7	UniRef100_G9I822 Structural maintenance of chromosomes domain-containing protein n=1 Tax=Citrus sinensis RepID=G9I822_CITSI	2e-135	99.7	AT3G14750.1 | Symbols: | unknown protein; BEST Arabidopsis thaliana protein match is: unknown protein (TAIR:AT1G67170.1); Has 4036 Blast hits to 3091 proteins in 519 species: Archae - 61; Bacteria - 669; Metazoa - 1503; Fungi - 255; Plants - 421; Viruses - 4; Other Eukaryotes - 1123 (source: NCBI BLink). | chr3:4953765-4955373 REVERSE LENGTH=331	3e-96	97.27	GO:0008150 GO:0048573	biological process; "photoperiodism, flowering"	GO:0003674	molecular function	GO:0005634	nucleus	NA	NA	NA	NA	NA	NA	NA	NA	NA	NA
Glyma08g15830	315	UniRef100_UPI0002338A03 UPI0002338A03 related cluster n=1 Tax=unknown RepID=UPI0002338A03	0	99.68	UniRef100_G7ZZD4 Ethylene responsive transcription factor 2a n=1 Tax=Medicago truncatula RepID=G7ZZD4_MEDTR	6e-56	98.1	AT1G68550.2 | Symbols: | Integrase-type DNA-binding superfamily protein | chr1:25725810-25726784 REVERSE LENGTH=324	6e-41	98.73	GO:0006355	regulation of transcription, DNA-dependent	GO:0003677 GO:0003700	DNA binding; "sequence-specific DNA binding transcription factor activity"	GO:0005634	nucleus	PF00847	AP2 domain	NA	NA	NA	NA	NA	NA	NA	NA
Glyma08g15840	387	UniRef100_I1KTH8 Uncharacterized protein (Fragment) n=2 Tax=Glycine max RepID=I1KTH8_SOYBN	0	98.97	UniRef100_G7KAD6 Polygalacturonase n=1 Tax=Medicago truncatula RepID=G7KAD6_MEDTR	1e-113	74.94	AT1G17150.1 | Symbols: | Pectin lyase-like superfamily protein | chr1:5865707-5867495 FORWARD LENGTH=402	5e-114	96.9	GO:0005975	carbohydrate metabolic process	GO:0004650	polygalacturonase activity	GO:0005576	extracellular region	PF00295	Glycosyl hydrolases family 28	NA	NA	NA	NA	NA	NA	NA	NA
Glyma08g15850	371	UniRef100_I1KTH9 Uncharacterized protein n=2 Tax=Glycine max RepID=I1KTH9_SOYBN	0	99.73	UniRef100_G7IJ12 Protein N-terminal asparagine amidohydrolase n=1 Tax=Medicago truncatula RepID=G7IJ12_MEDTR	3e-177	87.33	AT2G44420.1 | Symbols: | protein N-terminal asparagine amidohydrolase family protein | chr2:18330568-18332696 FORWARD LENGTH=347	8e-129	86.52	GO:0006499 GO:0007165 GO:0008150 GO:0009755	N-terminal protein myristoylation; "signal transduction"; "biological process"; "hormone-mediated signaling pathway"	GO:0008418	protein-N-terminal asparagine amidohydrolase activity	GO:0009507	chloroplast	NA	NA	PTHR12498	RAB3-GAP REGULATORY DOMAIN	NA	NA	3.5.1.-	In_linear_amides	K14662	protein_N-terminal_asparagine_amidohydrolase_[EC:3.5.1.-]
Glyma08g15860	161	UniRef100_I1KTI0 Uncharacterized protein n=1 Tax=Glycine max RepID=I1KTI0_SOYBN	3e-112	99.38	UniRef100_G7JKJ0 DNA-directed RNA polymerases I, II, and III subunit RPABC3 n=1 Tax=Medicago truncatula RepID=G7JKJ0_MEDTR	2e-67	99.38	AT3G59600.1 | Symbols: NRPB8B, NRPD8B, NRPE8B | RNA polymerase Rpb8 | chr3:22016629-22017923 FORWARD LENGTH=146	4e-38	96.27	GO:0006351	transcription, DNA-dependent	GO:0003899	DNA-directed RNA polymerase activity	GO:0005634 GO:0005665	nucleus; "DNA-directed RNA polymerase II, core complex"	PF03870	RNA polymerase Rpb8	PTHR10917	DNA-DIRECTED RNA POLYMERASE SUBUNIT RPB8	KOG3400	RNA_polymerase_subunit_8	NA	NA	NA	NA
Glyma08g15870	749	UniRef100_UPI0002338A05 UPI0002338A05 related cluster n=1 Tax=unknown RepID=UPI0002338A05	0	99.87	UniRef100_G7IJ06 Bromodomain protein n=1 Tax=Medicago truncatula RepID=G7IJ06_MEDTR	0	99.87	AT2G44430.1 | Symbols: | DNA-binding bromodomain-containing protein | chr2:18333603-18336165 FORWARD LENGTH=646	2e-94	97.86	NA	NA	GO:0003677	DNA binding	GO:0005634	nucleus	PF00439 PF00249	Bromodomain; "Myb-like DNA-binding domain"	PTHR22880 PTHR22880:SF52	FALZ-RELATED BROMODOMAIN-CONTAINING PROTEINS; "DNA-BINDING BROMODOMAIN-CONTAINING PROTEIN"	NA	NA	NA	NA	NA	NA
Glyma08g15880	425	UniRef100_I1KTI2 Uncharacterized protein n=1 Tax=Glycine max RepID=I1KTI2_SOYBN	0	98.59	UniRef100_G8Z280 Hop-interacting protein THI115 n=1 Tax=Solanum lycopersicum RepID=G8Z280_SOLLC	0	99.76	AT5G13020.1 | Symbols: | Emsy N Terminus (ENT)/ plant Tudor-like domains-containing protein | chr5:4129691-4132089 REVERSE LENGTH=397	6e-133	98.82	GO:0008150 GO:0008284 GO:0010413 GO:0045492	biological process; "positive regulation of cell proliferation"; "glucuronoxylan metabolic process"; "xylan biosynthetic process"	GO:0003674	molecular function	GO:0005634	nucleus	PF03735	ENT domain	NA	NA	KOG4675	Uncharacterized_conserved_protein,_contains_ENT_domain	NA	NA	NA	NA
Glyma08g15890	357	UniRef100_I1KTI3 Uncharacterized protein n=1 Tax=Glycine max RepID=I1KTI3_SOYBN	0	99.72	UniRef100_B9REI6 Flavonol synthase/flavanone 3-hydroxylase, putative n=1 Tax=Ricinus communis RepID=B9REI6_RICCO	1e-100	75.63	AT1G17020.1 | Symbols: SRG1, ATSRG1 | senescence-related gene 1 | chr1:5820258-5821741 FORWARD LENGTH=358	7e-101	99.72	GO:0009737 GO:0009793 GO:0009813 GO:0009830 GO:0009845 GO:0010162 GO:0010260 GO:0055114	response to abscisic acid stimulus; "embryo development ending in seed dormancy"; "flavonoid biosynthetic process"; "cell wall modification involved in abscission"; "seed germination"; "seed dormancy process"; "organ senescence"; "oxidation-reduction process"	GO:0016491 GO:0016682 GO:0016706	oxidoreductase activity; "oxidoreductase activity, acting on diphenols and related substances as donors, oxygen as acceptor"; "oxidoreductase activity, acting on paired donors, with incorporation or reduction of molecular oxygen, 2-oxoglutarate as one donor, and incorporation of one atom each of oxygen into both donors"	GO:0005737	cytoplasm	PF03171	2OG-Fe(II) oxygenase superfamily	PTHR10209 PTHR10209:SF55	FE(II)/ ASCORBATE OXIDASE SUPERFAMILY; "OXIDOREDUCTASE, 2OG-FE(II) OXYGENASE FAMILY PROTEI"	KOG0143	Iron/ascorbate_family_oxidoreductases	NA	NA	NA	NA
Glyma08g15910	443	UniRef100_I1KTI4 Uncharacterized protein (Fragment) n=1 Tax=Glycine max RepID=I1KTI4_SOYBN	0	97.52	UniRef100_G7K1Y8 Aspartic proteinase nepenthesin-1 n=1 Tax=Medicago truncatula RepID=G7K1Y8_MEDTR	2e-157	97.07	AT5G33340.1 | Symbols: CDR1 | Eukaryotic aspartyl protease family protein | chr5:12594474-12595787 FORWARD LENGTH=437	3e-145	94.13	GO:0006508 GO:0010310 GO:0010337 GO:0042742	proteolysis; "regulation of hydrogen peroxide metabolic process"; "regulation of salicylic acid metabolic process"; "defense response to bacterium"	GO:0004190	aspartic-type endopeptidase activity	GO:0005576 GO:0048046	extracellular region; "apoplast"	PF00026	Eukaryotic aspartyl protease	PTHR13683 PTHR13683:SF98	ASPARTYL PROTEASES; "CHLOROPLAST NUCLEIOD DNA-BINDING-RELATED"	KOG1339	Aspartyl_protease	NA	NA	NA	NA
Glyma08g15921	663	UniRef100_UPI00023380F3 UPI00023380F3 related cluster n=1 Tax=unknown RepID=UPI00023380F3	0	99.85	UniRef100_B9REI2 Serine/threonine protein kinase, putative n=1 Tax=Ricinus communis RepID=B9REI2_RICCO	0	99.85	AT2G32850.2 | Symbols: | Protein kinase superfamily protein | chr2:13935448-13937977 REVERSE LENGTH=670	0	99.85	GO:0006468	protein phosphorylation	GO:0004672 GO:0004674 GO:0005524 GO:0016772	protein kinase activity; "protein serine/threonine kinase activity"; "ATP binding"; "transferase activity, transferring phosphorus-containing groups"	GO:0005634 GO:0005737	nucleus; "cytoplasm"	PF00069	Protein kinase domain	PTHR22967 PTHR22967:SF47	SERINE/THREONINE PROTEIN KINASE; "SUBFAMILY NOT NAMED"	KOG1989	ARK_protein_kinase_family	2.7.11.1	non-specific_serine/threonine_protein_kinase	K08853	AP2-associated_kinase_[EC:2.7.11.1]
Glyma08g15931	440	UniRef100_UPI0002338A06 UPI0002338A06 related cluster n=1 Tax=unknown RepID=UPI0002338A06	0	94.55	UniRef100_G7I6K4 Beta-glucosidase D2 n=1 Tax=Medicago truncatula RepID=G7I6K4_MEDTR	2e-171	92.05	AT5G42260.1 | Symbols: BGLU12 | beta glucosidase 12 | chr5:16898712-16900235 FORWARD LENGTH=507	4e-170	92.73	GO:0005975	carbohydrate metabolic process	GO:0003824 GO:0004553 GO:0043169	catalytic activity; "hydrolase activity, hydrolyzing O-glycosyl compounds"; "cation binding"	GO:0005576 GO:0005794	extracellular region; "Golgi apparatus"	PF00232	Glycosyl hydrolase family 1	PTHR10353	GLYCOSIDE HYDROLASES	KOG0626	Beta-glucosidase,_lactase_phlorizinhydrolase,_and_related_proteins	NA	NA	NA	NA
Glyma08g15940	158	UniRef100_C6T063 Uncharacterized protein n=1 Tax=Glycine max RepID=C6T063_SOYBN	3e-110	99.37	UniRef100_G7LGL0 Ankyrin repeat domain-containing protein n=1 Tax=Medicago truncatula RepID=G7LGL0_MEDTR	4e-81	96.2	AT5G12320.1 | Symbols: | ankyrin repeat family protein | chr5:3982762-3983899 FORWARD LENGTH=144	1e-58	87.34	GO:0008150	biological process	NA	NA	GO:0005634	nucleus	PF00023	Ankyrin repeat	PTHR24193	FAMILY NOT NAMED; ""	KOG4214	Myotrophin_and_similar_proteins	NA	NA	NA	NA
Glyma08g15950	409	UniRef100_I1KTI8 Uncharacterized protein (Fragment) n=1 Tax=Glycine max RepID=I1KTI8_SOYBN	0	89.73	UniRef100_A2SY66 Vicianin hydrolase (Fragment) n=1 Tax=Vicia sativa subsp. nigra RepID=VICHY_VICSN	2e-136	83.13	AT2G44480.1 | Symbols: BGLU17 | beta glucosidase 17 | chr2:18359780-18363001 FORWARD LENGTH=517	7e-90	82.64	GO:0005975	carbohydrate metabolic process	GO:0003824 GO:0004553 GO:0043169	catalytic activity; "hydrolase activity, hydrolyzing O-glycosyl compounds"; "cation binding"	GO:0005576	extracellular region	PF00232	Glycosyl hydrolase family 1	PTHR10353	GLYCOSIDE HYDROLASES	KOG0626	Beta-glucosidase,_lactase_phlorizinhydrolase,_and_related_proteins	NA	NA	NA	NA
Glyma08g15960	372	UniRef100_UPI00023380F4 UPI00023380F4 related cluster n=1 Tax=unknown RepID=UPI00023380F4	2e-176	70.97	UniRef100_A2SY66 Vicianin hydrolase (Fragment) n=1 Tax=Vicia sativa subsp. nigra RepID=VICHY_VICSN	2e-127	66.67	AT2G44480.1 | Symbols: BGLU17 | beta glucosidase 17 | chr2:18359780-18363001 FORWARD LENGTH=517	6e-91	55.91	GO:0005975	carbohydrate metabolic process	GO:0003824 GO:0004553 GO:0043169	catalytic activity; "hydrolase activity, hydrolyzing O-glycosyl compounds"; "cation binding"	GO:0005576	extracellular region	PF00232	Glycosyl hydrolase family 1	PTHR10353	GLYCOSIDE HYDROLASES	NA	NA	NA	NA	NA	NA
Glyma08g15976	171	UniRef100_UPI0002338A08 UPI0002338A08 related cluster n=1 Tax=unknown RepID=UPI0002338A08	2e-97	85.38	UniRef100_A2SY66 Vicianin hydrolase (Fragment) n=1 Tax=Vicia sativa subsp. nigra RepID=VICHY_VICSN	8e-67	81.87	AT2G44480.1 | Symbols: BGLU17 | beta glucosidase 17 | chr2:18359780-18363001 FORWARD LENGTH=517	2e-41	69.01	GO:0005975	carbohydrate metabolic process	GO:0003824 GO:0004553 GO:0043169	catalytic activity; "hydrolase activity, hydrolyzing O-glycosyl compounds"; "cation binding"	GO:0005576	extracellular region	PF00232	Glycosyl hydrolase family 1	PTHR10353	GLYCOSIDE HYDROLASES	NA	NA	NA	NA	NA	NA
Glyma08g15993	221	UniRef100_I1KTJ1 Uncharacterized protein n=1 Tax=Glycine max RepID=I1KTJ1_SOYBN	1e-159	100	UniRef100_G7IZC8 Beta-glucosidase n=1 Tax=Medicago truncatula RepID=G7IZC8_MEDTR	1e-101	99.55	AT2G44480.2 | Symbols: BGLU17 | beta glucosidase 17 | chr2:18360476-18363001 FORWARD LENGTH=415	1e-72	97.74	GO:0005975	carbohydrate metabolic process	GO:0003824 GO:0004553 GO:0043169	catalytic activity; "hydrolase activity, hydrolyzing O-glycosyl compounds"; "cation binding"	GO:0005576	extracellular region	PF00232	Glycosyl hydrolase family 1	PTHR10353	GLYCOSIDE HYDROLASES	NA	NA	NA	NA	NA	NA
Glyma08g16010	166	UniRef100_I1KTJ2 Uncharacterized protein n=1 Tax=Glycine max RepID=I1KTJ2_SOYBN	3e-105	99.4	NA	NA	NA	NA	NA	NA	NA	NA	NA	NA	NA	NA	PF00098	Zinc knuckle	NA	NA	NA	NA	NA	NA	NA	NA
Glyma08g16020	578	UniRef100_I1KTJ3 Uncharacterized protein n=1 Tax=Glycine max RepID=I1KTJ3_SOYBN	0	99.83	UniRef100_G7IZD0 Growth regulator like protein n=1 Tax=Medicago truncatula RepID=G7IZD0_MEDTR	0	99.83	AT2G44500.1 | Symbols: | O-fucosyltransferase family protein | chr2:18374447-18376435 FORWARD LENGTH=573	0	97.92	GO:0008150	biological process	GO:0016757	transferase activity, transferring glycosyl groups	GO:0005794	Golgi apparatus	PF10250	GDP-fucose protein O-fucosyltransferase	NA	NA	NA	NA	NA	NA	NA	NA
Glyma08g16030	364	UniRef100_UPI0001CDD8F9 UPI0001CDD8F9 related cluster n=1 Tax=unknown RepID=UPI0001CDD8F9	0	99.73	UniRef100_A5A2I8 Uroporphiryn-III C-methyltransferase n=1 Tax=Medicago truncatula RepID=A5A2I8_MEDTR	0	99.45	AT5G40850.1 | Symbols: UPM1 | urophorphyrin methylase 1 | chr5:16367205-16368724 FORWARD LENGTH=369	3e-180	98.08	GO:0006567 GO:0006779 GO:0008152 GO:0019354 GO:0055114	threonine catabolic process; "porphyrin-containing compound biosynthetic process"; "metabolic process"; "siroheme biosynthetic process"; "oxidation-reduction process"	GO:0004851 GO:0008168 GO:0043115	uroporphyrin-III C-methyltransferase activity; "methyltransferase activity"; "precorrin-2 dehydrogenase activity"	GO:0009507	chloroplast	PF00590	Tetrapyrrole (Corrin/Porphyrin) Methylases	PTHR21091 PTHR21091:SF16	METHYLTETRAHYDROFOLATE:HOMOCYSTEINE METHYLTRANSFERASE RELATED; "UROPORPHYRIN-III METHYLTRANSFERASE"	KOG1527	Uroporphyrin_III_methyltransferase	NA	NA	NA	NA
Glyma08g16041	103	UniRef100_I1M2S3 Uncharacterized protein n=1 Tax=Glycine max RepID=I1M2S3_SOYBN	6e-33	92.23	UniRef100_G7ITG2 Disease resistance protein RFL1 n=1 Tax=Medicago truncatula RepID=G7ITG2_MEDTR	3e-16	91.26	NA	NA	NA	NA	NA	NA	NA	NA	NA	NA	NA	NA	NA	NA	NA	NA	NA	NA	NA
Glyma08g16050	63	UniRef100_I1KTJ6 Uncharacterized protein n=1 Tax=Glycine max RepID=I1KTJ6_SOYBN	1e-34	98.41	NA	NA	NA	NA	NA	NA	NA	NA	NA	NA	NA	NA	NA	NA	NA	NA	NA	NA	NA	NA	NA	NA
Glyma08g16057	96	UniRef100_C6T1R0 Putative uncharacterized protein n=1 Tax=Glycine max RepID=C6T1R0_SOYBN	2e-39	75	UniRef100_A1YLY2 Cytidine/deoxycytidylate deaminase family protein n=1 Tax=Zea mays RepID=A1YLY2_MAIZE	2e-36	75	AT5G28050.1 | Symbols: | Cytidine/deoxycytidylate deaminase family protein | chr5:10044209-10045755 REVERSE LENGTH=185	2e-37	75	GO:0009061 GO:0009218 GO:0019690 GO:0019692	anaerobic respiration; "pyrimidine ribonucleotide metabolic process"; "pyrimidine deoxyribonucleoside interconversion"; "deoxyribose phosphate metabolic process"	GO:0003824 GO:0008270 GO:0016787	catalytic activity; "zinc ion binding"; "hydrolase activity"	GO:0005829 GO:0009507	cytosol; "chloroplast"	PF00383	Cytidine and deoxycytidylate deaminase zinc-binding region	PTHR11079 PTHR11079:SF18	CYTOSINE DEAMINASE; "SUBFAMILY NOT NAMED"	NA	NA	NA	NA	NA	NA
Glyma08g16064	68	UniRef100_I1MLT7 Uncharacterized protein n=2 Tax=Glycine max RepID=I1MLT7_SOYBN	3e-17	95.59	UniRef100_C7S8C3 Germin-like protein 9 n=1 Tax=Glycine max RepID=C7S8C3_SOYBN	2e-11	76.47	NA	NA	NA	NA	NA	NA	NA	NA	NA	NA	NA	NA	NA	NA	NA	NA	NA	NA	NA
Glyma08g16072	329	UniRef100_UPI0002338A09 UPI0002338A09 related cluster n=1 Tax=unknown RepID=UPI0002338A09	0	99.7	UniRef100_Q39886 Protein kinase n=1 Tax=Glycine max RepID=Q39886_SOYBN	1e-126	96.66	AT5G58950.1 | Symbols: | Protein kinase superfamily protein | chr5:23801136-23803025 REVERSE LENGTH=525	2e-112	91.79	GO:0006468	protein phosphorylation	GO:0004672 GO:0004674 GO:0004712 GO:0005524 GO:0016301 GO:0016772	protein kinase activity; "protein serine/threonine kinase activity"; "protein serine/threonine/tyrosine kinase activity"; "ATP binding"; "kinase activity"; "transferase activity, transferring phosphorus-containing groups"	GO:0005829 GO:0005886	cytosol; "plasma membrane"	PF07714	Protein tyrosine kinase	PTHR23257 PTHR23257:SF81	SERINE-THREONINE PROTEIN KINASE; "PROTEIN-TYROSINE KINASE"	KOG0192	Tyrosine_kinase_specific_for_activated_(GTP-bound)_p21cdc42Hs	NA	NA	NA	NA
Glyma08g16080	133	UniRef100_I1KTJ7 Uncharacterized protein n=1 Tax=Glycine max RepID=I1KTJ7_SOYBN	8e-92	99.25	UniRef100_G7J1S6 Thioredoxin domain-containing protein n=1 Tax=Medicago truncatula RepID=G7J1S6_MEDTR	1e-78	99.25	AT5G42850.2 | Symbols: | Thioredoxin superfamily protein | chr5:17182072-17182568 REVERSE LENGTH=134	6e-53	89.47	GO:0045454	cell redox homeostasis	NA	NA	GO:0005737	cytoplasm	PF06110	Eukaryotic protein of unknown function (DUF953)	PTHR12452	42-9-9 PROTEIN-RELATED	KOG3425	Uncharacterized_conserved_protein	NA	NA	NA	NA
Glyma08g16091	706	UniRef100_I1KTJ8 Uncharacterized protein n=1 Tax=Glycine max RepID=I1KTJ8_SOYBN	0	85.41	UniRef100_G7J066 Sister chromatid cohesion 1 protein n=1 Tax=Medicago truncatula RepID=G7J066_MEDTR	5e-147	99.86	AT3G59550.1 | Symbols: SYN3, ATRAD21.2, ATSYN3 | Rad21/Rec8-like family protein | chr3:21997262-22000496 FORWARD LENGTH=693	7e-96	99.86	GO:0000087 GO:0000280 GO:0000911 GO:0006261 GO:0006275 GO:0007067 GO:0009555 GO:0009561 GO:0010389 GO:0042023 GO:0051225 GO:0051322	M phase of mitotic cell cycle; "nuclear division"; "cytokinesis by cell plate formation"; "DNA-dependent DNA replication"; "regulation of DNA replication"; "mitosis"; "pollen development"; "megagametogenesis"; "regulation of G2/M transition of mitotic cell cycle"; "DNA endoreduplication"; "spindle assembly"; "anaphase"	GO:0003674	molecular function	GO:0000228 GO:0000798 GO:0005634 GO:0005730	nuclear chromosome; "nuclear cohesin complex"; "nucleus"; "nucleolus"	PF04825 PF04824	N terminus of Rad21 / Rec8 like protein; "Conserved region of Rad21 / Rec8 like protein"	PTHR12585 PTHR12585:SF5	SCC1 / RAD21 FAMILY MEMBER; "COHESIN SUBUNIT RAD21"	KOG1213	Sister_chromatid_cohesion_complex_Cohesin,_subunit_RAD21/SCC1	NA	NA	NA	NA
Glyma08g16100	247	UniRef100_I1KTJ9 Uncharacterized protein n=2 Tax=Glycine max RepID=I1KTJ9_SOYBN	2e-176	99.6	UniRef100_G7J1T1 30S ribosomal protein n=1 Tax=Medicago truncatula RepID=G7J1T1_MEDTR	6e-108	99.6	AT3G52150.2 | Symbols: | RNA-binding (RRM/RBD/RNP motifs) family protein | chr3:19342074-19343090 FORWARD LENGTH=253	5e-99	72.47	GO:0009773 GO:0019288 GO:0045036	photosynthetic electron transport in photosystem I; "isopentenyl diphosphate biosynthetic process, mevalonate-independent pathway"; "protein targeting to chloroplast"	GO:0000166 GO:0003676 GO:0003723	nucleotide binding; "nucleic acid binding"; "RNA binding"	GO:0009507 GO:0009535 GO:0009570 GO:0009579 GO:0009941	chloroplast; "chloroplast thylakoid membrane"; "chloroplast stroma"; "thylakoid"; "chloroplast envelope"	PF00076	RNA recognition motif. (a.k.a. RRM, RBD, or RNP domain)	PTHR24012 PTHR24012:SF56	FAMILY NOT NAMED; "SUBFAMILY NOT NAMED"	KOG0131	Splicing_factor_3b,_subunit_4	NA	NA	NA	NA
Glyma08g16130	233	UniRef100_I1KTK0 Uncharacterized protein n=1 Tax=Glycine max RepID=I1KTK0_SOYBN	1e-163	99.57	UniRef100_B7FH28 60S ribosomal protein L6 n=1 Tax=Medicago truncatula RepID=B7FH28_MEDTR	6e-137	99.57	AT1G74060.1 | Symbols: | Ribosomal protein L6 family protein | chr1:27850033-27851299 REVERSE LENGTH=233	1e-117	98.71	GO:0006412	translation	GO:0003735	structural constituent of ribosome	GO:0005622 GO:0005730 GO:0005737 GO:0005840 GO:0022625 GO:0022626	intracellular; "nucleolus"; "cytoplasm"; "ribosome"; "cytosolic large ribosomal subunit"; "cytosolic ribosome"	PF01159 PF03868	Ribosomal protein L6e; "Ribosomal protein L6, N-terminal domain"	PTHR10715	60S RIBOSOMAL PROTEIN L6	KOG1694	60s_ribosomal_protein_L6	NA	NA	NA	NA
Glyma08g16140	812	UniRef100_I1KTK3 Uncharacterized protein (Fragment) n=1 Tax=Glycine max RepID=I1KTK3_SOYBN	0	96.43	UniRef100_G7J1T2 Glutathione peroxidase n=1 Tax=Medicago truncatula RepID=G7J1T2_MEDTR	0	99.88	AT5G48060.1 | Symbols: | C2 calcium/lipid-binding plant phosphoribosyltransferase family protein | chr5:19475296-19478878 FORWARD LENGTH=1036	0	99.38	GO:0008150	biological process	GO:0003674	molecular function	GO:0005634	nucleus	PF00168 PF08372	C2 domain; "Plant phosphoribosyltransferase C-terminal"	PTHR10024 PTHR10024:SF97	SYNAPTOTAGMIN; "C2 DOMAIN-CONTAINING PROTEIN"	KOG1028	Ca2+-dependent_phospholipid-binding_protein_Synaptotagmin,_required_for_synaptic_vesicle_and_secretory_granule_exocytosis	NA	NA	NA	NA
Glyma08g16150	445	UniRef100_UPI0002338A0A UPI0002338A0A related cluster n=1 Tax=unknown RepID=UPI0002338A0A	0	99.78	UniRef100_I1MJL8 Chaperone protein DnaJ 19 n=1 Tax=Glycine max RepID=I1MJL8_SOYBN	0	99.78	AT5G48030.1 | Symbols: GFA2 | gametophytic factor 2 | chr5:19466298-19469753 REVERSE LENGTH=456	0	99.55	GO:0000740 GO:0000741 GO:0006457 GO:0009553 GO:0009558 GO:0009560 GO:0010197 GO:0010198 GO:0051085	nuclear membrane fusion; "karyogamy"; "protein folding"; "embryo sac development"; "embryo sac cellularization"; "embryo sac egg cell differentiation"; "polar nucleus fusion"; "synergid death"; "chaperone mediated protein folding requiring cofactor"	GO:0031072 GO:0051082	heat shock protein binding; "unfolded protein binding"	GO:0005739	mitochondrion	PF00226 PF01556 PF00684	DnaJ domain; "DnaJ C terminal region"; "DnaJ central domain (4 repeats)"	PTHR24076 PTHR24076:SF80	FAMILY NOT NAMED; ""	KOG0715	Molecular_chaperone_(DnaJ_superfamily)	NA	NA	NA	NA
Glyma08g16160	113	UniRef100_I1KTK5 Uncharacterized protein n=1 Tax=Glycine max RepID=I1KTK5_SOYBN	2e-53	75.22	UniRef100_B9RHJ2 Lipid binding protein, putative n=1 Tax=Ricinus communis RepID=B9RHJ2_RICCO	3e-46	92.92	AT3G52130.1 | Symbols: | Bifunctional inhibitor/lipid-transfer protein/seed storage 2S albumin superfamily protein | chr3:19332081-19332458 REVERSE LENGTH=125	7e-37	68.14	GO:0006869	lipid transport	GO:0008289	lipid binding	GO:0005576	extracellular region	PF00234	Protease inhibitor/seed storage/LTP family	NA	NA	NA	NA	NA	NA	NA	NA
Glyma08g16170	107	UniRef100_UPI00023380F7 UPI00023380F7 related cluster n=1 Tax=unknown RepID=UPI00023380F7	8e-68	99.07	UniRef100_G7J1S6 Thioredoxin domain-containing protein n=1 Tax=Medicago truncatula RepID=G7J1S6_MEDTR	6e-55	99.07	AT5G42850.2 | Symbols: | Thioredoxin superfamily protein | chr5:17182072-17182568 REVERSE LENGTH=134	6e-39	70.09	GO:0045454	cell redox homeostasis	NA	NA	GO:0005737	cytoplasm	PF06110	Eukaryotic protein of unknown function (DUF953)	PTHR12452	42-9-9 PROTEIN-RELATED	NA	NA	NA	NA	NA	NA
Glyma08g16180	1443	UniRef100_UPI0002338A0B UPI0002338A0B related cluster n=1 Tax=unknown RepID=UPI0002338A0B	0	99.93	UniRef100_B9RHH9 Eukaryotic translation initiation factor 3 subunit, putative n=1 Tax=Ricinus communis RepID=B9RHH9_RICCO	0	99.93	AT3G52140.1 | Symbols: | tetratricopeptide repeat (TPR)-containing protein | chr3:19333232-19341295 FORWARD LENGTH=1403	0	99.1	GO:0006094 GO:0007010 GO:0008150 GO:0010498	gluconeogenesis; "cytoskeleton organization"; "biological process"; "proteasomal protein catabolic process"	NA	NA	GO:0005634 GO:0005829 GO:0005886 GO:0009507	nucleus; "cytosol"; "plasma membrane"; "chloroplast"	PF05303	Protein of unknown function (DUF727)	PTHR12601	EUKARYOTIC TRANSLATION INITIATION FACTOR 3 SUBUNIT (EIF-3)	KOG1839	Uncharacterized_protein_CLU1/cluA/TIF31_involved_in_mitochondrial_morphology/distribution,_also_found_associated_with_eIF-3	NA	NA	NA	NA
Glyma08g16190	451	UniRef100_I1KTK8 Uncharacterized protein n=1 Tax=Glycine max RepID=I1KTK8_SOYBN	0	99.78	UniRef100_G7IWI2 DNA binding protein n=1 Tax=Medicago truncatula RepID=G7IWI2_MEDTR	0	96.23	AT2G42280.1 | Symbols: | basic helix-loop-helix (bHLH) DNA-binding superfamily protein | chr2:17611428-17613163 REVERSE LENGTH=359	9e-51	90.91	GO:0006355 GO:0046685 GO:0048573	regulation of transcription, DNA-dependent; "response to arsenic-containing substance"; "photoperiodism, flowering"	GO:0003677 GO:0003700	DNA binding; "sequence-specific DNA binding transcription factor activity"	GO:0005634	nucleus	PF00010	Helix-loop-helix DNA-binding domain	PTHR10985 PTHR10985:SF42	BASIC HELIX-LOOP-HELIX TRANSCRIPTION FACTOR, HES-RELATED; "SUBFAMILY NOT NAMED"	NA	NA	NA	NA	NA	NA
Glyma08g16200	436	UniRef100_I1KTK9 Uncharacterized protein n=1 Tax=Glycine max RepID=I1KTK9_SOYBN	0	99.77	UniRef100_G7LDP5 Splicing factor 4-like protein n=1 Tax=Medicago truncatula RepID=G7LDP5_MEDTR	0	99.77	AT3G52120.1 | Symbols: | SWAP (Suppressor-of-White-APricot)/surp domain-containing protein / D111/G-patch domain-containing protein | chr3:19329243-19331738 FORWARD LENGTH=443	0	99.77	GO:0006396	RNA processing	GO:0003676 GO:0003723	nucleic acid binding; "RNA binding"	GO:0005622 GO:0005634	intracellular; "nucleus"	PF01585 PF01805	G-patch domain; "Surp module"	PTHR23340	ARGININE/SERINE RICH SPLICING FACTOR SF4/14	NA	NA	NA	NA	NA	NA
Glyma08g16210	261	UniRef100_C6TCU8 Uncharacterized protein n=1 Tax=Glycine max RepID=C6TCU8_SOYBN	0	99.62	UniRef100_G7IWJ3 tRNA/rRNA methyltransferase, putative n=1 Tax=Medicago truncatula RepID=G7IWJ3_MEDTR	3e-138	93.87	AT5G26880.2 | Symbols: | AGAMOUS-like 26 | chr5:9457950-9459190 REVERSE LENGTH=263	3e-114	78.93	GO:0006396 GO:0006995 GO:0016114	RNA processing; "cellular response to nitrogen starvation"; "terpenoid biosynthetic process"	GO:0003677 GO:0003700 GO:0003723 GO:0008173 GO:0046983	DNA binding; "sequence-specific DNA binding transcription factor activity"; "RNA binding"; "RNA methyltransferase activity"; "protein dimerization activity"	GO:0009507	chloroplast	PF00588	SpoU rRNA Methylase family	PTHR12029 PTHR12029:SF26	RNA METHYLASE; ""	NA	NA	NA	NA	NA	NA
Glyma08g16220	359	UniRef100_C6ZRY8 Leucine rich repeat protein n=1 Tax=Glycine max RepID=C6ZRY8_SOYBN	0	76.32	UniRef100_C6ZRY8 Leucine rich repeat protein n=1 Tax=Glycine max RepID=C6ZRY8_SOYBN	0	76.32	AT3G20820.1 | Symbols: | Leucine-rich repeat (LRR) family protein | chr3:7280930-7282027 FORWARD LENGTH=365	4e-154	94.71	GO:0006952 GO:0007165	defense response; "signal transduction"	NA	NA	GO:0005618 GO:0005886 GO:0009506 GO:0009507 GO:0016020 GO:0048046	cell wall; "plasma membrane"; "plasmodesma"; "chloroplast"; "membrane"; "apoplast"	PF00560 PF08263	Leucine Rich Repeat; "Leucine rich repeat N-terminal domain"	PTHR24420 PTHR24420:SF701 PTHR24420:SF645	FAMILY NOT NAMED; ""; ""	KOG4579	Leucine-rich_repeat_(LRR)_protein_associated_with_apoptosis_in_muscle_tissue	NA	NA	NA	NA
Glyma08g16240	268	UniRef100_I1KTL2 Uncharacterized protein n=1 Tax=Glycine max RepID=I1KTL2_SOYBN	0	98.88	UniRef100_G7IWK2 Pentatricopeptide repeat-containing protein n=1 Tax=Medicago truncatula RepID=G7IWK2_MEDTR	1e-115	94.78	AT5G40410.1 | Symbols: | Tetratricopeptide repeat (TPR)-like superfamily protein | chr5:16171385-16173211 FORWARD LENGTH=608	1e-90	94.4	GO:0008150	biological process	NA	NA	GO:0005739	mitochondrion	PF01535	PPR repeat; ""; ""; ""; ""; ""; ""; ""; ""	PTHR24015	FAMILY NOT NAMED	NA	NA	NA	NA	NA	NA
Glyma08g16251	68	UniRef100_G7LEG8 Putative uncharacterized protein n=1 Tax=Medicago truncatula RepID=G7LEG8_MEDTR	5e-08	98.53	NA	NA	NA	NA	NA	NA	NA	NA	NA	NA	NA	NA	NA	NA	NA	NA	NA	NA	NA	NA	NA	NA
Glyma08g16260	682	UniRef100_I1KTL3 Uncharacterized protein n=1 Tax=Glycine max RepID=I1KTL3_SOYBN	0	93.26	UniRef100_G7IWL5 Polyadenylate-binding protein 2-A n=1 Tax=Medicago truncatula RepID=G7IWL5_MEDTR	0	99.85	AT3G12640.1 | Symbols: | RNA binding (RRM/RBD/RNP motifs) family protein | chr3:4014455-4017675 FORWARD LENGTH=638	3e-140	99.12	GO:0000398 GO:0006397 GO:0006486	mRNA splicing, via spliceosome; "mRNA processing"; "protein glycosylation"	GO:0000166 GO:0003676 GO:0003723	nucleotide binding; "nucleic acid binding"; "RNA binding"	GO:0005634	nucleus	PF01480 PF00076	PWI domain; "RNA recognition motif. (a.k.a. RRM, RBD, or RNP domain)"	PTHR23365	POLY-A BINDING PROTEIN 2	KOG3702	Nuclear_polyadenylated_RNA_binding_protein	NA	NA	NA	NA
Glyma08g16270	165	UniRef100_E0A2W1 AN1-like transcription factor n=1 Tax=Glycine max RepID=E0A2W1_SOYBN	8e-116	99.39	UniRef100_E0A2W1 AN1-like transcription factor n=1 Tax=Glycine max RepID=E0A2W1_SOYBN	8e-116	99.39	AT3G12630.1 | Symbols: | A20/AN1-like zinc finger family protein | chr3:4012707-4013189 FORWARD LENGTH=160	7e-58	99.39	GO:0006007 GO:0009414 GO:0016567 GO:0051865	glucose catabolic process; "response to water deprivation"; "protein ubiquitination"; "protein autoubiquitination"	GO:0003677 GO:0004842 GO:0008270	DNA binding; "ubiquitin-protein ligase activity"; "zinc ion binding"	GO:0005634	nucleus	PF01754 PF01428	A20-like zinc finger; "AN1-like Zinc finger"	PTHR10634	PRK1-ASSOCIATED ZINC FINGER PROTEIN	KOG3173	Predicted_Zn-finger_protein	NA	NA	NA	NA
Glyma08g16280	349	UniRef100_UPI000233C198 UPI000233C198 related cluster n=1 Tax=unknown RepID=UPI000233C198	1e-62	71.63	UniRef100_G7J9J9 Protein argonaute n=1 Tax=Medicago truncatula RepID=G7J9J9_MEDTR	1e-43	47.85	AT2G32940.1 | Symbols: AGO6 | Argonaute family protein | chr2:13972218-13976856 REVERSE LENGTH=878	9e-27	68.48	GO:0006306 GO:0006342 GO:0007062 GO:0007129 GO:0007131 GO:0010332 GO:0030422 GO:0031048 GO:0032204 GO:0032504 GO:0042138 GO:0043247 GO:0045132	DNA methylation; "chromatin silencing"; "sister chromatid cohesion"; "synapsis"; "reciprocal meiotic recombination"; "response to gamma radiation"; "production of siRNA involved in RNA interference"; "chromatin silencing by small RNA"; "regulation of telomere maintenance"; "multicellular organism reproduction"; "meiotic DNA double-strand break formation"; "telomere maintenance in response to DNA …	GO:0003676 GO:0035197	nucleic acid binding; "siRNA binding"	GO:0005634 GO:0005737	nucleus; "cytoplasm"	NA	NA	NA	NA	NA	NA	NA	NA	NA	NA
Glyma08g16290	130	NA	NA	NA	NA	NA	NA	NA	NA	NA	NA	NA	NA	NA	NA	NA	NA	NA	NA	NA	NA	NA	NA	NA	NA	NA
Glyma08g16301	64	UniRef100_UPI00023380FA UPI00023380FA related cluster n=1 Tax=unknown RepID=UPI00023380FA	7e-33	98.44	NA	NA	NA	NA	NA	NA	NA	NA	NA	NA	NA	NA	NA	NA	NA	NA	NA	NA	NA	NA	NA	NA
Glyma08g16310	112	UniRef100_UPI00023380FB UPI00023380FB related cluster n=1 Tax=unknown RepID=UPI00023380FB	2e-37	63.39	NA	NA	NA	NA	NA	NA	NA	NA	NA	NA	NA	NA	NA	NA	NA	NA	NA	NA	NA	NA	NA	NA
Glyma08g16340	364	UniRef100_I1KTL6 Uncharacterized protein n=1 Tax=Glycine max RepID=I1KTL6_SOYBN	0	99.73	UniRef100_G7IWL8 E3 ubiquitin-protein ligase makorin n=1 Tax=Medicago truncatula RepID=G7IWL8_MEDTR	0	98.08	AT3G08505.1 | Symbols: | zinc finger (CCCH-type/C3HC4-type RING finger) family protein | chr3:2580603-2582043 REVERSE LENGTH=323	4e-157	99.45	NA	NA	GO:0003676 GO:0008270	nucleic acid binding; "zinc ion binding"	GO:0005634	nucleus	PF00097 PF00642	Zinc finger, C3HC4 type (RING finger); "Zinc finger C-x8-C-x5-C-x3-H type (and similar)"	PTHR11224 PTHR11224:SF10	MAKORIN; "MAKORIN 2"	KOG1039	Predicted_E3_ubiquitin_ligase	NA	NA	NA	NA
Glyma08g16346	634	UniRef100_I1KTL7 Uncharacterized protein n=1 Tax=Glycine max RepID=I1KTL7_SOYBN	0	76.34	UniRef100_G7LIC7 HAT family dimerization domain containing protein n=1 Tax=Medicago truncatula RepID=G7LIC7_MEDTR	9e-98	74.45	AT3G17450.1 | Symbols: | hAT dimerisation domain-containing protein | chr3:5972793-5975684 REVERSE LENGTH=877	5e-90	94.64	GO:0008150	biological process	GO:0003677 GO:0046983	DNA binding; "protein dimerization activity"	GO:0005634	nucleus	PF04937 PF02892	Protein of unknown function (DUF 659); "BED zinc finger"	PTHR10775 PTHR10775:SF75	AC-LIKE TRANSPOSASE-RELATED; "HAT DIMERISATION DOMAIN-CONTAINING PROTEIN"	NA	NA	NA	NA	NA	NA
Glyma08g16353	102	NA	NA	NA	NA	NA	NA	NA	NA	NA	NA	NA	NA	NA	NA	NA	NA	NA	NA	NA	NA	NA	NA	NA	NA	NA
Glyma08g16360	454	UniRef100_UPI0002338A0E UPI0002338A0E related cluster n=1 Tax=unknown RepID=UPI0002338A0E	0	99.78	UniRef100_G7IWL7 Makorin RING finger protein n=1 Tax=Medicago truncatula RepID=G7IWL7_MEDTR	0	96.26	AT3G08505.1 | Symbols: | zinc finger (CCCH-type/C3HC4-type RING finger) family protein | chr3:2580603-2582043 REVERSE LENGTH=323	3e-96	68.72	NA	NA	GO:0003676 GO:0008270	nucleic acid binding; "zinc ion binding"	GO:0005634	nucleus	PF00097 PF00642	Zinc finger, C3HC4 type (RING finger); "Zinc finger C-x8-C-x5-C-x3-H type (and similar)"	PTHR11224 PTHR11224:SF10	MAKORIN; "MAKORIN 2"	KOG1039	Predicted_E3_ubiquitin_ligase	NA	NA	NA	NA
Glyma08g16370	247	UniRef100_I1KTL9 Uncharacterized protein n=1 Tax=Glycine max RepID=I1KTL9_SOYBN	6e-180	99.6	UniRef100_B9SL97 Thylakoid lumenal 19 kDa protein, chloroplast, putative n=1 Tax=Ricinus communis RepID=B9SL97_RICCO	3e-113	96.36	AT3G63540.1 | Symbols: | Mog1/PsbP/DUF1795-like photosystem II reaction center PsbP family protein | chr3:23459372-23459803 REVERSE LENGTH=143	4e-82	56.68	NA	NA	NA	NA	NA	NA	PF01789	PsbP	NA	NA	NA	NA	NA	NA	NA	NA
Glyma08g16380	514	UniRef100_I1KTM0 Uncharacterized protein (Fragment) n=1 Tax=Glycine max RepID=I1KTM0_SOYBN	0	92.61	UniRef100_G7LFN2 Disease resistance protein n=1 Tax=Medicago truncatula RepID=G7LFN2_MEDTR	0	98.83	AT5G66900.1 | Symbols: | Disease resistance protein (CC-NBS-LRR class) family | chr5:26714931-26717757 REVERSE LENGTH=809	8e-81	96.11	GO:0006952	defense response	GO:0043531	ADP binding	GO:0005634	nucleus	PF00560 PF00931	Leucine Rich Repeat; "NB-ARC domain"	PTHR23155 PTHR23155:SF282	LEUCINE-RICH REPEAT-CONTAINING PROTEIN; "SUBFAMILY NOT NAMED"	NA	NA	NA	NA	NA	NA
Glyma08g16390	347	UniRef100_I1KTM1 Uncharacterized protein n=1 Tax=Glycine max RepID=I1KTM1_SOYBN	0	99.71	UniRef100_G7LDN1 Zinc finger-like protein n=1 Tax=Medicago truncatula RepID=G7LDN1_MEDTR	2e-150	99.71	AT3G57670.1 | Symbols: NTT, WIP2 | C2H2-type zinc finger family protein | chr3:21370936-21373121 FORWARD LENGTH=383	9e-119	97.69	GO:0006355 GO:0009827 GO:0009860 GO:0010500	regulation of transcription, DNA-dependent; "plant-type cell wall modification"; "pollen tube growth"; "transmitting tissue development"	GO:0003676 GO:0003700 GO:0008270	nucleic acid binding; "sequence-specific DNA binding transcription factor activity"; "zinc ion binding"	GO:0005622 GO:0005634	intracellular; "nucleus"	NA	NA	PTHR10593	SERINE/THREONINE-PROTEIN KINASE RIO	NA	NA	NA	NA	NA	NA
Glyma08g16397	292	UniRef100_UPI0002338A0F UPI0002338A0F related cluster n=1 Tax=unknown RepID=UPI0002338A0F	0	93.84	UniRef100_Q013Y4 WGS project CAID00000000 data, contig chromosome 08 n=1 Tax=Ostreococcus tauri RepID=Q013Y4_OSTTA	1e-25	61.3	AT2G26840.1 | Symbols: | unknown protein; FUNCTIONS IN: molecular_function unknown; INVOLVED IN: biological_process unknown; LOCATED IN: chloroplast; BEST Arabidopsis thaliana protein match is: unknown protein (TAIR:AT3G43910.1); Has 835 Blast hits to 835 proteins in 26 species: Archae - 0; Bacteria - 25; Metazoa - 0; Fungi - 0; Plants - 40; Viruses - 2; Other Eukaryotes - 768 (source: NCBI BLink…	1e-76	85.96	GO:0008150	biological process	GO:0003674	molecular function	GO:0009507	chloroplast	NA	NA	NA	NA	NA	NA	NA	NA	NA	NA
Glyma08g16404	70	UniRef100_I1KTM2 Uncharacterized protein (Fragment) n=1 Tax=Glycine max RepID=I1KTM2_SOYBN	1e-40	98.57	UniRef100_B4FLD8 S-adenosylmethionine-dependent methyltransferase/ methyltransferase n=1 Tax=Zea mays RepID=B4FLD8_MAIZE	5e-15	97.14	AT2G26810.2 | Symbols: | Putative methyltransferase family protein | chr2:11433900-11436078 REVERSE LENGTH=256	1e-22	98.57	GO:0008150	biological process	GO:0003674	molecular function	GO:0005737	cytoplasm	NA	NA	NA	NA	NA	NA	NA	NA	NA	NA
Glyma08g16412	217	UniRef100_UPI00023380FF UPI00023380FF related cluster n=1 Tax=unknown RepID=UPI00023380FF	3e-133	85.25	UniRef100_B4FLD8 S-adenosylmethionine-dependent methyltransferase/ methyltransferase n=1 Tax=Zea mays RepID=B4FLD8_MAIZE	3e-71	70.97	AT2G26810.3 | Symbols: | Putative methyltransferase family protein | chr2:11434317-11436078 REVERSE LENGTH=209	9e-73	72.35	GO:0008150	biological process	GO:0003674	molecular function	GO:0005737	cytoplasm	PF10294	Putative methyltransferase	PTHR23108	METHYLTRANSFERASE-RELATED	NA	NA	NA	NA	NA	NA
Glyma08g16420	389	UniRef100_I1KTM3 Uncharacterized protein n=1 Tax=Glycine max RepID=I1KTM3_SOYBN	0	99.74	UniRef100_O49875 Adenine nucleotide translocator n=1 Tax=Lupinus albus RepID=O49875_LUPAL	0	99.74	AT5G13490.2 | Symbols: AAC2 | ADP/ATP carrier 2 | chr5:4336034-4337379 FORWARD LENGTH=385	0	99.74	GO:0006094 GO:0006612 GO:0006810 GO:0006820 GO:0006862 GO:0006865 GO:0006888 GO:0006944 GO:0007010 GO:0010363 GO:0010498 GO:0015696 GO:0015802 GO:0015865 GO:0043069 GO:0043090 GO:0043269 GO:0055085	gluconeogenesis; "protein targeting to membrane"; "transport"; "anion transport"; "nucleotide transport"; "amino acid transport"; "ER to Golgi vesicle-mediated transport"; "cellular membrane fusion"; "cytoskeleton organization"; "regulation of plant-type hypersensitive response"; "proteasomal protein catabolic process"; "ammonium transport"; "basic amino acid transport"; "purine nucleotide transp…	GO:0005215 GO:0005471 GO:0005507 GO:0005515	transporter activity; "ATP:ADP antiporter activity"; "copper ion binding"; "protein binding"	GO:0005739 GO:0005740 GO:0005743 GO:0005774 GO:0009507 GO:0009941 GO:0016020	mitochondrion; "mitochondrial envelope"; "mitochondrial inner membrane"; "vacuolar membrane"; "chloroplast"; "chloroplast envelope"; "membrane"	PF00153	Mitochondrial carrier protein	PTHR24089 PTHR24089:SF35	FAMILY NOT NAMED; "SUBFAMILY NOT NAMED"	KOG0749	Mitochondrial_ADP/ATP_carrier_proteins	NA	NA	K05863	solute_carrier_family_25_(mitochondrial_carrier;_adenine_nucleotide_translocator)
Glyma08g16440	329	UniRef100_UPI0002338102 UPI0002338102 related cluster n=1 Tax=unknown RepID=UPI0002338102	0	96.66	UniRef100_Q10R20 Expressed protein n=1 Tax=Oryza sativa Japonica Group RepID=Q10R20_ORYSJ	2e-29	87.54	AT3G52110.2 | Symbols: | unknown protein; FUNCTIONS IN: molecular_function unknown; INVOLVED IN: biological_process unknown; LOCATED IN: cellular_component unknown; EXPRESSED IN: 20 plant structures; EXPRESSED DURING: 11 growth stages. | chr3:19323925-19325632 REVERSE LENGTH=334	2e-72	88.75	GO:0000226 GO:0000911 GO:0008150	microtubule cytoskeleton organization; "cytokinesis by cell plate formation"; "biological process"	GO:0003674	molecular function	GO:0005634	nucleus	NA	NA	NA	NA	NA	NA	NA	NA	NA	NA
Glyma08g16460	68	UniRef100_I1KTM5 Uncharacterized protein n=2 Tax=Glycine max RepID=I1KTM5_SOYBN	7e-40	98.53	UniRef100_B7EG04 cDNA clone:J023009A03, full insert sequence n=2 Tax=Oryza RepID=B7EG04_ORYSJ	5e-09	89.71	AT3G52105.1 | Symbols: | unknown protein; FUNCTIONS IN: molecular_function unknown; INVOLVED IN: biological_process unknown; LOCATED IN: endomembrane system; Has 35333 Blast hits to 34131 proteins in 2444 species: Archae - 798; Bacteria - 22429; Metazoa - 974; Fungi - 991; Plants - 531; Viruses - 0; Other Eukaryotes - 9610 (source: NCBI BLink). | chr3:19323394-19323606 FORWARD LENGTH=70	1e-22	94.12	GO:0006661 GO:0008150	phosphatidylinositol biosynthetic process; "biological process"	GO:0003674	molecular function	NA	NA	NA	NA	NA	NA	NA	NA	NA	NA	NA	NA
Glyma08g16470	246	UniRef100_C6SWQ6 Uncharacterized protein n=1 Tax=Glycine max RepID=C6SWQ6_SOYBN	6e-175	99.59	UniRef100_I1MJN8 ATP synthase n=1 Tax=Glycine max RepID=I1MJN8_SOYBN	4e-108	68.29	AT5G13450.1 | Symbols: ATP5 | delta subunit of Mt ATP synthase | chr5:4310558-4311941 REVERSE LENGTH=238	1e-91	98.78	GO:0000302 GO:0006511 GO:0009853 GO:0010039 GO:0015979 GO:0015986 GO:0051788 GO:0055072 GO:0080129	response to reactive oxygen species; "ubiquitin-dependent protein catabolic process"; "photorespiration"; "response to iron ion"; "photosynthesis"; "ATP synthesis coupled proton transport"; "response to misfolded protein"; "iron ion homeostasis"; "proteasome core complex assembly"	GO:0008270 GO:0046933 GO:0050897	zinc ion binding; "hydrogen ion transporting ATP synthase activity, rotational mechanism"; "cobalt ion binding"	GO:0000275 GO:0005739 GO:0005753 GO:0005886 GO:0009507 GO:0016020	mitochondrial proton-transporting ATP synthase complex, catalytic core F(1); "mitochondrion"; "mitochondrial proton-transporting ATP synthase complex"; "plasma membrane"; "chloroplast"; "membrane"	PF00213	ATP synthase delta (OSCP) subunit	PTHR11910	ATP SYNTHASE DELTA CHAIN	KOG1662	Mitochondrial_F1F0-ATP_synthase,_subunit_OSCP/ATP5	3.6.3.14	H(+)-transporting_two-sector_ATPase	K02137	F-type_H+-transporting_ATPase_oligomycin_sensitivity_conferral_protein_[EC:3.6.3.14]
Glyma08g16490	93	UniRef100_I1KTM8 Uncharacterized protein n=1 Tax=Glycine max RepID=I1KTM8_SOYBN	9e-62	98.92	UniRef100_P33083 Auxin-induced protein 6B n=1 Tax=Glycine max RepID=AX6B_SOYBN	4e-49	96.77	AT4G38840.1 | Symbols: | SAUR-like auxin-responsive protein family | chr4:18125174-18125473 REVERSE LENGTH=99	6e-32	96.77	GO:0009409 GO:0009733 GO:0042742	response to cold; "response to auxin stimulus"; "defense response to bacterium"	GO:0003674	molecular function	GO:0005886 GO:0009507	plasma membrane; "chloroplast"	PF02519	Auxin responsive protein	NA	NA	NA	NA	NA	NA	NA	NA
Glyma08g16500	94	UniRef100_UPI0002338105 UPI0002338105 related cluster n=1 Tax=unknown RepID=UPI0002338105	3e-62	98.94	UniRef100_P33079 Auxin-induced protein 10A5 n=2 Tax=Glycine max RepID=A10A5_SOYBN	3e-46	98.94	AT4G38840.1 | Symbols: | SAUR-like auxin-responsive protein family | chr4:18125174-18125473 REVERSE LENGTH=99	2e-30	89.36	GO:0009409 GO:0009733 GO:0042742	response to cold; "response to auxin stimulus"; "defense response to bacterium"	GO:0003674	molecular function	GO:0005886 GO:0009507	plasma membrane; "chloroplast"	PF02519	Auxin responsive protein	NA	NA	NA	NA	NA	NA	NA	NA
Glyma08g16506	93	UniRef100_I1KTN0 Uncharacterized protein n=2 Tax=Glycine max RepID=I1KTN0_SOYBN	1e-62	98.92	UniRef100_P32295 Indole-3-acetic acid-induced protein ARG7 n=1 Tax=Vigna radiata var. radiata RepID=ARG7_VIGRR	3e-52	98.92	AT4G38840.1 | Symbols: | SAUR-like auxin-responsive protein family | chr4:18125174-18125473 REVERSE LENGTH=99	2e-33	72.04	GO:0009409 GO:0009733 GO:0042742	response to cold; "response to auxin stimulus"; "defense response to bacterium"	GO:0003674	molecular function	GO:0005886 GO:0009507	plasma membrane; "chloroplast"	PF02519	Auxin responsive protein	NA	NA	NA	NA	NA	NA	K14488	SAUR_family_protein
Glyma08g16513	92	UniRef100_UPI0002338104 UPI0002338104 related cluster n=1 Tax=unknown RepID=UPI0002338104	2e-61	98.91	UniRef100_P32295 Indole-3-acetic acid-induced protein ARG7 n=1 Tax=Vigna radiata var. radiata RepID=ARG7_VIGRR	7e-52	98.91	AT4G38840.1 | Symbols: | SAUR-like auxin-responsive protein family | chr4:18125174-18125473 REVERSE LENGTH=99	7e-33	72.83	GO:0009409 GO:0009733 GO:0042742	response to cold; "response to auxin stimulus"; "defense response to bacterium"	GO:0003674	molecular function	GO:0005886 GO:0009507	plasma membrane; "chloroplast"	PF02519	Auxin responsive protein	NA	NA	NA	NA	NA	NA	K14488	SAUR_family_protein
Glyma08g16520	104	UniRef100_I1KTN2 Uncharacterized protein n=1 Tax=Glycine max RepID=I1KTN2_SOYBN	1e-59	87.5	UniRef100_G7JL22 Auxin-induced protein 6B n=1 Tax=Medicago truncatula RepID=G7JL22_MEDTR	2e-43	87.5	AT4G38840.1 | Symbols: | SAUR-like auxin-responsive protein family | chr4:18125174-18125473 REVERSE LENGTH=99	3e-31	87.5	GO:0009409 GO:0009733 GO:0042742	response to cold; "response to auxin stimulus"; "defense response to bacterium"	GO:0003674	molecular function	GO:0005886 GO:0009507	plasma membrane; "chloroplast"	PF02519	Auxin responsive protein	NA	NA	NA	NA	NA	NA	NA	NA
Glyma08g16550	93	UniRef100_I1KTN4 Uncharacterized protein n=1 Tax=Glycine max RepID=I1KTN4_SOYBN	9e-61	98.92	UniRef100_P33083 Auxin-induced protein 6B n=1 Tax=Glycine max RepID=AX6B_SOYBN	3e-46	96.77	AT4G38840.1 | Symbols: | SAUR-like auxin-responsive protein family | chr4:18125174-18125473 REVERSE LENGTH=99	3e-31	72.04	GO:0009409 GO:0009733 GO:0042742	response to cold; "response to auxin stimulus"; "defense response to bacterium"	GO:0003674	molecular function	GO:0005886 GO:0009507	plasma membrane; "chloroplast"	PF02519	Auxin responsive protein	NA	NA	NA	NA	NA	NA	NA	NA
Glyma08g16560	1236	UniRef100_I1MJN9 Uncharacterized protein n=1 Tax=Glycine max RepID=I1MJN9_SOYBN	0	99.92	UniRef100_B5TFM7 Telomerase reverse transcriptase n=1 Tax=Populus trichocarpa RepID=B5TFM7_POPTR	0	99.68	AT5G16850.1 | Symbols: ATTERT, TERT | telomerase reverse transcriptase | chr5:5538323-5543444 REVERSE LENGTH=1123	0	99.11	GO:0000723 GO:0006278 GO:0007000 GO:0007004 GO:0050000 GO:0051276	telomere maintenance; "RNA-dependent DNA replication"; "nucleolus organization"; "telomere maintenance via telomerase"; "chromosome localization"; "chromosome organization"	GO:0003677 GO:0003720 GO:0003721 GO:0003723 GO:0003964 GO:0005515	DNA binding; "telomerase activity"; "telomeric template RNA reverse transcriptase activity"; "RNA binding"; "RNA-directed DNA polymerase activity"; "protein binding"	GO:0005634	nucleus	PF12009 PF00078	Telomerase ribonucleoprotein complex - RNA binding domain; "Reverse transcriptase (RNA-dependent DNA polymerase)"	PTHR12066	TELOMERASE REVERSE TRANSCRIPTASE	KOG1005	Telomerase_catalytic_subunit/reverse_transcriptase_TERT	2.7.7.49	RNA-directed_DNA_polymerase.	K11126	telomerase_reverse_transcriptase_[EC:2.7.7.49]
Glyma08g16570	272	UniRef100_UPI000233A6C5 UPI000233A6C5 related cluster n=1 Tax=unknown RepID=UPI000233A6C5	1e-162	99.63	UniRef100_G7LE06 Transcription factor HEC3 n=1 Tax=Medicago truncatula RepID=G7LE06_MEDTR	6e-94	97.06	AT4G00120.1 | Symbols: IND1, GT140, IND, EDA33 | basic helix-loop-helix (bHLH) DNA-binding superfamily protein | chr4:42601-43197 REVERSE LENGTH=198	9e-46	32.72	GO:0006355 GO:0010197	regulation of transcription, DNA-dependent; "polar nucleus fusion"	GO:0003677 GO:0003700	DNA binding; "sequence-specific DNA binding transcription factor activity"	GO:0005634	nucleus	PF00010	Helix-loop-helix DNA-binding domain	PTHR12565	STEROL REGULATORY ELEMENT-BINDING PROTEIN	NA	NA	NA	NA	NA	NA
Glyma08g16580	437	UniRef100_I1KTN7 Uncharacterized protein n=1 Tax=Glycine max RepID=I1KTN7_SOYBN	0	99.77	UniRef100_F4I037 Protein trichome berefringence-like 7 n=1 Tax=Arabidopsis thaliana RepID=F4I037_ARATH	0	94.97	AT1G48880.1 | Symbols: TBL7 | TRICHOME BIREFRINGENCE-LIKE 7 | chr1:18081033-18082650 FORWARD LENGTH=445	0	94.97	GO:0008150	biological process	NA	NA	NA	NA	PF03005	Arabidopsis proteins of unknown function	PTHR13533 PTHR13533:SF3	FAMILY NOT NAMED; "gb def: unknown protein [takifugu rubripes]"	NA	NA	NA	NA	NA	NA
Glyma08g16590	592	UniRef100_I1KTN8 Uncharacterized protein n=1 Tax=Glycine max RepID=I1KTN8_SOYBN	0	99.83	UniRef100_Q9FUF3 FAS2 n=1 Tax=Glycine max RepID=Q9FUF3_SOYBN	0	99.83	AT5G64630.2 | Symbols: FAS2, NFB01, NFB1, MUB3.9 | Transducin/WD40 repeat-like superfamily protein | chr5:25833298-25836158 FORWARD LENGTH=487	0	77.03	GO:0000724 GO:0006310 GO:0006334 GO:0008283 GO:0009555 GO:0009933 GO:0010026 GO:0031507 GO:0048366	double-strand break repair via homologous recombination; "DNA recombination"; "nucleosome assembly"; "cell proliferation"; "pollen development"; "meristem structural organization"; "trichome differentiation"; "heterochromatin assembly"; "leaf development"	GO:0000166 GO:0005515	nucleotide binding; "protein binding"	GO:0005634 GO:0033186	nucleus; "CAF-1 complex"	PF00400	WD domain, G-beta repeat	PTHR15271	CHROMATIN ASSEMBLY FACTOR I SUBUNIT P60, (CAF-I 60 )	KOG1009	Chromatin_assembly_complex_1_subunit_B/CAC2_(contains_WD40_repeats)	NA	NA	K10751	chromatin_assembly_factor_1_subunit_B
Glyma08g16600	183	UniRef100_I1KTN9 Uncharacterized protein n=1 Tax=Glycine max RepID=I1KTN9_SOYBN	1e-128	99.45	UniRef100_G7JBI0 Pectinesterase inhibitor n=1 Tax=Medicago truncatula RepID=G7JBI0_MEDTR	5e-68	98.36	AT5G64620.1 | Symbols: C/VIF2, ATC/VIF2 | cell wall / vacuolar inhibitor of fructosidase 2 | chr5:25831875-25832417 FORWARD LENGTH=180	5e-54	98.36	GO:0043086 GO:0080167	negative regulation of catalytic activity; "response to karrikin"	GO:0004857 GO:0030599 GO:0046910	enzyme inhibitor activity; "pectinesterase activity"; "pectinesterase inhibitor activity"	GO:0005576	extracellular region	PF04043	Plant invertase/pectin methylesterase inhibitor	NA	NA	NA	NA	NA	NA	NA	NA
Glyma08g16610	623	UniRef100_G7LE12 Cysteine desulfurase n=1 Tax=Medicago truncatula RepID=G7LE12_MEDTR	0	99.36	UniRef100_G7LE12 Cysteine desulfurase n=1 Tax=Medicago truncatula RepID=G7LE12_MEDTR	0	99.36	NA	NA	NA	NA	NA	NA	NA	NA	NA	PF00266	Aminotransferase class-V	PTHR11601 PTHR11601:SF13	CYSTEINE DESULFURYLASE; "NITROGEN FIXATION PROTEIN-RELATED"	NA	NA	NA	NA	NA	NA
Glyma08g16620	1113	UniRef100_UPI000233826E UPI000233826E related cluster n=1 Tax=unknown RepID=UPI000233826E	0	99.91	UniRef100_G7LE13 Phosphatidylinositol 4-kinase n=1 Tax=Medicago truncatula RepID=G7LE13_MEDTR	0	99.91	AT5G64070.1 | Symbols: PI-4KBETA1, PI4KBETA1 | phosphatidylinositol 4-OH kinase beta1 | chr5:25637492-25643902 REVERSE LENGTH=1121	0	99.91	GO:0006661 GO:0009860 GO:0046854 GO:0048015 GO:0048768	phosphatidylinositol biosynthetic process; "pollen tube growth"; "phosphatidylinositol phosphorylation"; "phosphatidylinositol-mediated signaling"; "root hair cell tip growth"	GO:0004430 GO:0005515 GO:0016772 GO:0016773 GO:0017137 GO:0043424	1-phosphatidylinositol 4-kinase activity; "protein binding"; "transferase activity, transferring phosphorus-containing groups"; "phosphotransferase activity, alcohol group as acceptor"; "Rab GTPase binding"; "protein histidine kinase binding"	GO:0005634 GO:0005829 GO:0009507 GO:0016020 GO:0030659 GO:0035619	nucleus; "cytosol"; "chloroplast"; "membrane"; "cytoplasmic vesicle membrane"; "root hair tip"	PF00454	Phosphatidylinositol 3- and 4-kinase	PTHR10048	PHOSPHATIDYLINOSITOL KINASE	KOG0903	Phosphatidylinositol_4-kinase,_involved_in_intracellular_trafficking_and_secretion	2.7.1.67	1-phosphatidylinositol_4-kinase	K00888	phosphatidylinositol_4-kinase_[EC:2.7.1.67]
Glyma08g16630	324	UniRef100_I1KTP2 Uncharacterized protein n=1 Tax=Glycine max RepID=I1KTP2_SOYBN	0	99.69	UniRef100_Q9M4U3 NAC1 n=1 Tax=Medicago truncatula RepID=Q9M4U3_MEDTR	1e-112	69.75	AT5G64060.1 | Symbols: anac103, NAC103 | NAC domain containing protein 103 | chr5:25633818-25635152 REVERSE LENGTH=356	2e-80	70.06	GO:0006355 GO:0007275	regulation of transcription, DNA-dependent; "multicellular organismal development"	GO:0003677 GO:0003700	DNA binding; "sequence-specific DNA binding transcription factor activity"	GO:0005634	nucleus	PF02365	No apical meristem (NAM) protein	NA	NA	NA	NA	NA	NA	NA	NA
Glyma08g16640	92	UniRef100_I1KTP4 Uncharacterized protein n=1 Tax=Glycine max RepID=I1KTP4_SOYBN	6e-57	98.91	UniRef100_Q2QWP2 Expressed protein n=1 Tax=Oryza sativa Japonica Group RepID=Q2QWP2_ORYSJ	1e-12	61.96	AT4G33467.2 | Symbols: | unknown protein; Has 25 Blast hits to 25 proteins in 9 species: Archae - 0; Bacteria - 0; Metazoa - 0; Fungi - 0; Plants - 25; Viruses - 0; Other Eukaryotes - 0 (source: NCBI BLink). | chr4:16101691-16102084 REVERSE LENGTH=101	5e-12	61.96	NA	NA	NA	NA	NA	NA	NA	NA	NA	NA	NA	NA	NA	NA	NA	NA
Glyma08g16651	101	NA	NA	NA	NA	NA	NA	NA	NA	NA	NA	NA	NA	NA	NA	NA	NA	NA	NA	NA	NA	NA	NA	NA	NA	NA
Glyma08g16660	1917	UniRef100_UPI0002338B5E UPI0002338B5E related cluster n=1 Tax=unknown RepID=UPI0002338B5E	0	99.95	UniRef100_G7LE18 Callose synthase n=1 Tax=Medicago truncatula RepID=G7LE18_MEDTR	0	99.9	AT2G13680.1 | Symbols: CALS5, GLS2, ATGSL02 | callose synthase 5 | chr2:5695124-5706134 FORWARD LENGTH=1923	0	99.53	GO:0006075 GO:0009556 GO:0009827 GO:0009846 GO:0009860 GO:0010208 GO:0010584 GO:0080092	(1->3)-beta-D-glucan biosynthetic process; "microsporogenesis"; "plant-type cell wall modification"; "pollen germination"; "pollen tube growth"; "pollen wall assembly"; "pollen exine formation"; "regulation of pollen tube growth"	GO:0003843	1,3-beta-D-glucan synthase activity	GO:0000148 GO:0005886 GO:0016020	1,3-beta-D-glucan synthase complex; "plasma membrane"; "membrane"	PF04652 PF02364	Vta1 like; "1,3-beta-glucan synthase component"	PTHR12741 PTHR12741:SF4	UNCHARACTERIZED DUF605; "gb def: Hypothetical protein F10M23.90 (AT4g26750/F10M23 90) (Hypothetical protein AT4g2"	KOG0916	1,3-beta-glucan_synthase/callose_synthase_catalytic_subunit	NA	NA	NA	NA
Glyma08g16670	597	UniRef100_I1KTP6 Uncharacterized protein n=1 Tax=Glycine max RepID=I1KTP6_SOYBN	0	99.83	UniRef100_Q75PK5 Mitogen-activated kinase kinase kinase alpha n=1 Tax=Lotus japonicus RepID=Q75PK5_LOTJA	0	99.83	AT1G53570.3 | Symbols: MAP3KA, MAPKKK3 | mitogen-activated protein kinase kinase kinase 3 | chr1:19987391-19990733 FORWARD LENGTH=608	0	99.83	GO:0006468 GO:0006487	protein phosphorylation; "protein N-linked glycosylation"	GO:0004672 GO:0004713 GO:0005524 GO:0016301 GO:0016772	protein kinase activity; "protein tyrosine kinase activity"; "ATP binding"; "kinase activity"; "transferase activity, transferring phosphorus-containing groups"	GO:0005634	nucleus	PF00069	Protein kinase domain	PTHR24361 PTHR24361:SF64	MITOGEN-ACTIVATED KINASE KINASE KINASE; ""	KOG0198	MEKK_and_related_serine/threonine_protein_kinases	NA	NA	NA	NA
Glyma08g16680	210	UniRef100_C6T2M4 Putative uncharacterized protein n=1 Tax=Glycine max RepID=C6T2M4_SOYBN	6e-150	99.52	UniRef100_G7JBL5 GTP-binding protein yptV3 n=1 Tax=Medicago truncatula RepID=G7JBL5_MEDTR	2e-130	99.52	AT1G43890.3 | Symbols: ATRAB18, ATRABC1, RAB18-1, RABC1, ATRAB-C1, RAB18 | RAB GTPASE HOMOLOG B18 | chr1:16646934-16648395 FORWARD LENGTH=212	5e-126	95.24	GO:0007264 GO:0015031	small GTPase mediated signal transduction; "protein transport"	GO:0005525	GTP binding	GO:0005886	plasma membrane	PF00071	Ras family	PTHR24073 PTHR24073:SF482	FAMILY NOT NAMED; ""	KOG0080	GTPase_Rab18,_small_G_protein_superfamily	NA	NA	K07910	Ras-related_protein_Rab-18
Glyma08g16685	111	UniRef100_UPI0002338B5F UPI0002338B5F related cluster n=1 Tax=unknown RepID=UPI0002338B5F	9e-73	99.1	UniRef100_A9P324 TPR repeats-like protein n=1 Tax=Taiwania cryptomerioides RepID=A9P324_9CONI	5e-49	91.89	NA	NA	NA	NA	NA	NA	NA	NA	NA	NA	NA	NA	NA	NA	NA	NA	NA	NA	NA
Glyma08g16690	197	UniRef100_I1KTP9 Uncharacterized protein n=1 Tax=Glycine max RepID=I1KTP9_SOYBN	6e-143	99.49	UniRef100_G7JJK5 RING finger protein n=1 Tax=Medicago truncatula RepID=G7JJK5_MEDTR	1e-54	98.48	AT2G44410.1 | Symbols: | RING/U-box superfamily protein | chr2:18328873-18330114 FORWARD LENGTH=413	2e-31	57.87	NA	NA	GO:0008270	zinc ion binding	GO:0005634	nucleus	NA	NA	PTHR12313	RNF5	NA	NA	NA	NA	NA	NA
Glyma08g16700	284	UniRef100_I1KTQ0 Uncharacterized protein n=1 Tax=Glycine max RepID=I1KTQ0_SOYBN	0	99.65	UniRef100_B9DF92 AT5G19900 protein n=1 Tax=Arabidopsis thaliana RepID=B9DF92_ARATH	3e-38	75.7	AT5G19900.1 | Symbols: | PRLI-interacting factor, putative | chr5:6728561-6730045 REVERSE LENGTH=494	7e-41	75.7	GO:0008150	biological process	GO:0003674	molecular function	GO:0005634	nucleus	NA	NA	NA	NA	NA	NA	NA	NA	NA	NA
Glyma08g16715	557	UniRef100_UPI0002338273 UPI0002338273 related cluster n=1 Tax=unknown RepID=UPI0002338273	0	98.2	UniRef100_G7KWP5 Callose synthase n=2 Tax=Medicago truncatula RepID=G7KWP5_MEDTR	0	98.92	AT5G13000.1 | Symbols: ATGSL12, gsl12 | glucan synthase-like 12 | chr5:4110445-4121202 REVERSE LENGTH=1955	0	98.92	GO:0000226 GO:0000911 GO:0006075 GO:0006346 GO:0006944 GO:0007267 GO:0009556 GO:0009616 GO:0010267 GO:0016246 GO:0031048 GO:0035196 GO:0051567 GO:0052543	microtubule cytoskeleton organization; "cytokinesis by cell plate formation"; "(1->3)-beta-D-glucan biosynthetic process"; "methylation-dependent chromatin silencing"; "cellular membrane fusion"; "cell-cell signaling"; "microsporogenesis"; "virus induced gene silencing"; "production of ta-siRNAs involved in RNA interference"; "RNA interference"; "chromatin silencing by small RNA"; "production of …	GO:0003843 GO:0016757	1,3-beta-D-glucan synthase activity; "transferase activity, transferring glycosyl groups"	GO:0000148 GO:0005886 GO:0016020	1,3-beta-D-glucan synthase complex; "plasma membrane"; "membrane"	PF02364	1,3-beta-glucan synthase component	PTHR12741 PTHR12741:SF4	UNCHARACTERIZED DUF605; "gb def: Hypothetical protein F10M23.90 (AT4g26750/F10M23 90) (Hypothetical protein AT4g2"	NA	NA	NA	NA	NA	NA
Glyma08g16730	1407	UniRef100_UPI0002338272 UPI0002338272 related cluster n=1 Tax=unknown RepID=UPI0002338272	0	99.93	UniRef100_Q9SL03 Callose synthase 2 n=1 Tax=Arabidopsis thaliana RepID=CALS2_ARATH	0	99.93	AT2G31960.2 | Symbols: GSL03 | glucan synthase-like 3 | chr2:13589545-13600066 FORWARD LENGTH=1950	0	99.93	GO:0006075 GO:0006944 GO:0009556 GO:0010228 GO:0016926 GO:0050665 GO:0052543	(1->3)-beta-D-glucan biosynthetic process; "cellular membrane fusion"; "microsporogenesis"; "vegetative to reproductive phase transition of meristem"; "protein desumoylation"; "hydrogen peroxide biosynthetic process"; "callose deposition in cell wall"	GO:0003843 GO:0016757	1,3-beta-D-glucan synthase activity; "transferase activity, transferring glycosyl groups"	GO:0000148 GO:0005886 GO:0016020	1,3-beta-D-glucan synthase complex; "plasma membrane"; "membrane"	PF02364 PF04652	1,3-beta-glucan synthase component; "Vta1 like"	PTHR12741 PTHR12741:SF4	UNCHARACTERIZED DUF605; "gb def: Hypothetical protein F10M23.90 (AT4g26750/F10M23 90) (Hypothetical protein AT4g2"	NA	NA	NA	NA	NA	NA
Glyma08g16743	378	UniRef100_I1KTQ2 Uncharacterized protein n=2 Tax=Glycine max RepID=I1KTQ2_SOYBN	3e-172	62.17	UniRef100_B9SK31 GTP binding protein, putative n=1 Tax=Ricinus communis RepID=B9SK31_RICCO	4e-127	97.62	AT4G10650.1 | Symbols: | P-loop containing nucleoside triphosphate hydrolases superfamily protein | chr4:6574472-6576231 REVERSE LENGTH=377	2e-120	97.09	GO:0008150	biological process	GO:0005525	GTP binding	GO:0005737	cytoplasm	PF01926	GTPase of unknown function	PTHR11089 PTHR11089:SF4	GTP-BINDING PROTEIN-RELATED; "GTP-BINDING PROTEIN-RELATED"	KOG2485	Conserved_ATP/GTP_binding_protein	NA	NA	NA	NA
Glyma08g16756	124	UniRef100_C6T061 Putative uncharacterized protein n=1 Tax=Glycine max RepID=C6T061_SOYBN	5e-82	99.19	NA	NA	NA	NA	NA	NA	NA	NA	NA	NA	NA	NA	NA	NA	NA	NA	NA	NA	NA	NA	NA	NA
Glyma08g16770	473	UniRef100_I1KTQ4 Citrate synthase n=1 Tax=Glycine max RepID=I1KTQ4_SOYBN	0	99.79	UniRef100_I1KTQ4 Citrate synthase n=1 Tax=Glycine max RepID=I1KTQ4_SOYBN	0	99.79	AT2G44350.1 | Symbols: ATCS, CSY4 | Citrate synthase family protein | chr2:18316673-18320524 FORWARD LENGTH=473	0	99.79	GO:0006096 GO:0006099 GO:0009060 GO:0044262 GO:0046686	glycolysis; "tricarboxylic acid cycle"; "aerobic respiration"; "cellular carbohydrate metabolic process"; "response to cadmium ion"	GO:0004108 GO:0005524 GO:0008270 GO:0046912	citrate (SI)-synthase activity; "ATP binding"; "zinc ion binding"; "transferase activity, transferring acyl groups, acyl groups converted into alkyl on transfer"	GO:0005618 GO:0005739 GO:0009507	cell wall; "mitochondrion"; "chloroplast"	PF00285	Citrate synthase	PTHR11739	CITRATE SYNTHASE	KOG2617	Citrate_synthase	2.3.3.1	Citrate_(Si)-synthase	K01647	citrate_synthase_[EC:2.3.3.1]
Glyma08g16780	401	UniRef100_I1KTQ5 Uncharacterized protein n=1 Tax=Glycine max RepID=I1KTQ5_SOYBN	0	99.75	UniRef100_B9REL9 Molybdopterin cofactor synthesis protein A, putative n=1 Tax=Ricinus communis RepID=B9REL9_RICCO	0	99.75	AT2G31955.2 | Symbols: CNX2 | cofactor of nitrate reductase and xanthine dehydrogenase 2 | chr2:13584635-13586484 REVERSE LENGTH=390	0	99.75	GO:0006777	Mo-molybdopterin cofactor biosynthetic process	GO:0003824 GO:0046872 GO:0051536 GO:0051539	catalytic activity; "metal ion binding"; "iron-sulfur cluster binding"; "4 iron, 4 sulfur cluster binding"	GO:0005739 GO:0009507 GO:0019008	mitochondrion; "chloroplast"; "molybdopterin synthase complex"	PF04055 PF06463	Radical SAM superfamily; "Molybdenum Cofactor Synthesis C"	PTHR22960	MOLYBDOPTERIN COFACTOR SYNTHESIS PROTEIN A	KOG2876	Molybdenum_cofactor_biosynthesis_pathway_protein	NA	NA	K03639	molybdenum_cofactor_biosynthesis_protein
Glyma08g16790	142	UniRef100_I1KTQ6 Uncharacterized protein n=1 Tax=Glycine max RepID=I1KTQ6_SOYBN	3e-98	99.3	UniRef100_D7LVY8 VQ motif-containing protein n=1 Tax=Arabidopsis lyrata subsp. lyrata RepID=D7LVY8_ARALL	3e-18	95.77	AT2G42140.1 | Symbols: | VQ motif-containing protein | chr2:17568964-17569482 REVERSE LENGTH=172	1e-22	95.77	GO:0008150	biological process	GO:0003674	molecular function	GO:0005739	mitochondrion	PF05678	VQ motif	NA	NA	NA	NA	NA	NA	NA	NA
Glyma08g16800	48	NA	NA	NA	NA	NA	NA	NA	NA	NA	NA	NA	NA	NA	NA	NA	NA	NA	NA	NA	NA	NA	NA	NA	NA	NA
Glyma08g16810	85	UniRef100_I1KTQ7 Uncharacterized protein n=2 Tax=Glycine max RepID=I1KTQ7_SOYBN	1e-50	96.47	NA	NA	NA	AT2G31945.1 | Symbols: | unknown protein; FUNCTIONS IN: molecular_function unknown; INVOLVED IN: biological_process unknown; LOCATED IN: endomembrane system; EXPRESSED IN: 8 plant structures; EXPRESSED DURING: 4 anthesis, petal differentiation and expansion stage; BEST Arabidopsis thaliana protein match is: unknown protein (TAIR:AT1G05575.1); Has 61 Blast hits to 61 proteins in 10 species: Archae…	4e-18	77.65	GO:0008150 GO:0009407 GO:0009693 GO:0010583	biological process; "toxin catabolic process"; "ethylene biosynthetic process"; "response to cyclopentenone"	GO:0003674	molecular function	NA	NA	NA	NA	NA	NA	NA	NA	NA	NA	NA	NA
Glyma08g16821	148	NA	NA	NA	NA	NA	NA	NA	NA	NA	NA	NA	NA	NA	NA	NA	NA	NA	NA	NA	NA	NA	NA	NA	NA	NA
Glyma08g16830	208	UniRef100_I1KTQ8 Uncharacterized protein n=1 Tax=Glycine max RepID=I1KTQ8_SOYBN	5e-150	99.52	UniRef100_Q002B3 Cytokinesis negative regulator RCP1 n=1 Tax=Nicotiana tabacum RepID=Q002B3_TOBAC	2e-29	94.71	AT3G60080.1 | Symbols: | RING/U-box superfamily protein | chr3:22187635-22188555 FORWARD LENGTH=306	7e-25	81.25	NA	NA	GO:0008270	zinc ion binding	GO:0005634	nucleus	PF00097	Zinc finger, C3HC4 type (RING finger)	PTHR22763	RING ZINC FINGER PROTEIN	NA	NA	NA	NA	NA	NA
Glyma08g16840	517	UniRef100_I1KTQ9 Uncharacterized protein n=1 Tax=Glycine max RepID=I1KTQ9_SOYBN	0	99.81	UniRef100_B9REM7 ATP binding protein, putative n=1 Tax=Ricinus communis RepID=B9REM7_RICCO	0	99.81	AT4G25835.1 | Symbols: | P-loop containing nucleoside triphosphate hydrolases superfamily protein | chr4:13136117-13137637 FORWARD LENGTH=506	6e-124	86.27	NA	NA	GO:0000166 GO:0005524 GO:0016887 GO:0017111	nucleotide binding; "ATP binding"; "ATPase activity"; "nucleoside-triphosphatase activity"	GO:0005886	plasma membrane	PF00004	ATPase family associated with various cellular activities (AAA)	PTHR23070 PTHR23070:SF1	BCS1 AAA-TYPE ATPASE; "AAA-TYPE ATPASE-RELATED"	KOG0743	AAA+-type_ATPase	NA	NA	NA	NA
Glyma08g16845	162	NA	NA	NA	NA	NA	NA	NA	NA	NA	NA	NA	NA	NA	NA	NA	NA	NA	NA	NA	NA	NA	NA	NA	NA	NA
Glyma08g16850	124	UniRef100_C6SYI5 Uncharacterized protein n=1 Tax=Glycine max RepID=C6SYI5_SOYBN	8e-81	99.19	UniRef100_D7LEB2 Oxidoreductase/ transition metal ion binding protein n=2 Tax=Arabidopsis lyrata subsp. lyrata RepID=D7LEB2_ARALL	3e-38	92.74	AT2G31940.1 | Symbols: | unknown protein; INVOLVED IN: biological_process unknown; LOCATED IN: endomembrane system; EXPRESSED IN: 16 plant structures; EXPRESSED DURING: 6 growth stages; BEST Arabidopsis thaliana protein match is: unknown protein (TAIR:AT5G19875.1); Has 227 Blast hits to 227 proteins in 13 species: Archae - 0; Bacteria - 0; Metazoa - 0; Fungi - 0; Plants - 227; Viruses - 0; Other …	9e-39	92.74	GO:0008150	biological process	NA	NA	GO:0005739	mitochondrion	NA	NA	NA	NA	NA	NA	NA	NA	NA	NA
Glyma08g16870	453	UniRef100_I1KTR2 Uncharacterized protein n=2 Tax=Glycine max RepID=I1KTR2_SOYBN	0	99.78	UniRef100_Q8L7S2 AT3g60070/T2O9_50 n=3 Tax=Arabidopsis thaliana RepID=Q8L7S2_ARATH	0	99.56	AT2G44280.2 | Symbols: | Major facilitator superfamily protein | chr2:18301563-18303927 REVERSE LENGTH=462	0	99.56	GO:0008150	biological process	GO:0003674	molecular function	GO:0005575	cellular component	NA	NA	PTHR11328 PTHR11328:SF24	SODIUM:GALACTOSIDE SYMPORTER FAMILY MEMBER; "GLUCURONIDE PERMEASE-RELATED"	KOG4830	Predicted_sugar_transporter	NA	NA	NA	NA
Glyma08g16880	197	UniRef100_I1KTR5 Uncharacterized protein n=1 Tax=Glycine max RepID=I1KTR5_SOYBN	3e-140	99.49	NA	NA	NA	NA	NA	NA	NA	NA	NA	NA	NA	NA	NA	NA	NA	NA	NA	NA	NA	NA	NA	NA
Glyma08g16891	570	UniRef100_UPI0002338B64 UPI0002338B64 related cluster n=1 Tax=unknown RepID=UPI0002338B64	0	99.82	UniRef100_A2Q3C0 Legume lectin, beta domain n=1 Tax=Medicago truncatula RepID=A2Q3C0_MEDTR	0	99.65	AT2G31920.1 | Symbols: | Plant protein of unknown function (DUF936) | chr2:13574053-13576367 REVERSE LENGTH=585	8e-91	99.3	NA	NA	NA	NA	GO:0009507	chloroplast	PF06075	Plant protein of unknown function (DUF936)	NA	NA	NA	NA	NA	NA	NA	NA
Glyma08g16900	52	UniRef100_I1KTR7 Uncharacterized protein n=1 Tax=Glycine max RepID=I1KTR7_SOYBN	4e-28	98.08	NA	NA	NA	NA	NA	NA	NA	NA	NA	NA	NA	NA	NA	NA	NA	NA	NA	NA	NA	NA	NA	NA
Glyma08g16910	461	UniRef100_I1KTR8 Uncharacterized protein (Fragment) n=2 Tax=Glycine max RepID=I1KTR8_SOYBN	0	87.64	UniRef100_Q9SYJ8 F3F20.2 protein n=1 Tax=Arabidopsis thaliana RepID=Q9SYJ8_ARATH	1e-65	84.82	AT1G05577.1 | Symbols: | Domain of unknown function (DUF966) | chr1:1662643-1664288 REVERSE LENGTH=372	3e-68	84.82	GO:0008150	biological process	GO:0003674	molecular function	GO:0005575	cellular component	PF06136	Domain of unknown function (DUF966)	NA	NA	NA	NA	NA	NA	NA	NA
Glyma08g16940	541	UniRef100_I1MJH8 Uncharacterized protein n=2 Tax=Glycine max RepID=I1MJH8_SOYBN	0	95.75	UniRef100_O64861 Expressed protein n=1 Tax=Arabidopsis thaliana RepID=O64861_ARATH	0	94.09	AT2G44260.1 | Symbols: | Plant protein of unknown function (DUF946) | chr2:18295988-18297739 FORWARD LENGTH=553	0	94.09	GO:0006499	N-terminal protein myristoylation	GO:0003674	molecular function	GO:0009507	chloroplast	PF06101	Plant protein of unknown function (DUF946)	PTHR17204 PTHR17204:SF7	PRE-MRNA PROCESSING PROTEIN PRP39-RELATED; "PRE-MRNA PROCESSING-RELATED"	NA	NA	NA	NA	NA	NA
Glyma08g16947	246	UniRef100_I1KTS1 Uncharacterized protein n=1 Tax=Glycine max RepID=I1KTS1_SOYBN	2e-78	47.56	UniRef100_C6ZS37 Candidate disease-resistance protein n=1 Tax=Glycine max RepID=C6ZS37_SOYBN	2e-28	39.43	AT1G72930.2 | Symbols: TIR | toll/interleukin-1 receptor-like | chr1:27439476-27439934 FORWARD LENGTH=152	6e-17	30.89	GO:0006952 GO:0007165	defense response; "signal transduction"	NA	NA	GO:0005622 GO:0005737 GO:0009506	intracellular; "cytoplasm"; "plasmodesma"	PF01582	TIR domain	PTHR23155 PTHR23155:SF344	LEUCINE-RICH REPEAT-CONTAINING PROTEIN; ""	NA	NA	NA	NA	NA	NA
Glyma08g16954	310	UniRef100_UPI0002338B66 UPI0002338B66 related cluster n=1 Tax=unknown RepID=UPI0002338B66	0	93.87	UniRef100_A2Q3B2 Vacuolar protein sorting-associated protein n=1 Tax=Medicago truncatula RepID=A2Q3B2_MEDTR	3e-133	93.55	AT2G44260.1 | Symbols: | Plant protein of unknown function (DUF946) | chr2:18295988-18297739 FORWARD LENGTH=553	1e-116	93.55	GO:0006499	N-terminal protein myristoylation	GO:0003674	molecular function	GO:0009507	chloroplast	PF06101	Plant protein of unknown function (DUF946)	PTHR17204 PTHR17204:SF7	PRE-MRNA PROCESSING PROTEIN PRP39-RELATED; "PRE-MRNA PROCESSING-RELATED"	NA	NA	NA	NA	NA	NA
Glyma08g16962	302	UniRef100_UPI0002338B66 UPI0002338B66 related cluster n=1 Tax=unknown RepID=UPI0002338B66	0	99.01	UniRef100_A2Q3B2 Vacuolar protein sorting-associated protein n=1 Tax=Medicago truncatula RepID=A2Q3B2_MEDTR	1e-99	96.69	AT2G44260.1 | Symbols: | Plant protein of unknown function (DUF946) | chr2:18295988-18297739 FORWARD LENGTH=553	3e-77	80.79	GO:0006499	N-terminal protein myristoylation	GO:0003674	molecular function	GO:0009507	chloroplast	PF06101	Plant protein of unknown function (DUF946)	PTHR17204 PTHR17204:SF7	PRE-MRNA PROCESSING PROTEIN PRP39-RELATED; "PRE-MRNA PROCESSING-RELATED"	NA	NA	NA	NA	NA	NA
Glyma08g16970	586	UniRef100_I1KTS3 Uncharacterized protein n=1 Tax=Glycine max RepID=I1KTS3_SOYBN	0	99.83	UniRef100_G7IQQ5 Beta-hexosaminidase subunit beta n=1 Tax=Medicago truncatula RepID=G7IQQ5_MEDTR	0	94.71	AT1G05590.1 | Symbols: HEXO2, ATHEX3 | beta-hexosaminidase 2 | chr1:1669871-1671686 FORWARD LENGTH=580	0	98.46	GO:0005975	carbohydrate metabolic process	GO:0003824 GO:0004553 GO:0004563 GO:0015929 GO:0035251 GO:0043169	catalytic activity; "hydrolase activity, hydrolyzing O-glycosyl compounds"; "beta-N-acetylhexosaminidase activity"; "hexosaminidase activity"; "UDP-glucosyltransferase activity"; "cation binding"	GO:0005576 GO:0005886	extracellular region; "plasma membrane"	PF02838 PF00728	Glycosyl hydrolase family 20, domain 2; "Glycosyl hydrolase family 20, catalytic domain"	PTHR22600	BETA-HEXOSAMINIDASE	KOG2499	Beta-N-acetylhexosaminidase	3.2.1.52	Beta-N-acetylhexosaminidase	K12373	hexosaminidase_[EC:3.2.1.52]
Glyma08g16980	434	UniRef100_I1KTS4 Uncharacterized protein n=1 Tax=Glycine max RepID=I1KTS4_SOYBN	0	99.77	UniRef100_G7LHL5 GPI mannosyltransferase n=1 Tax=Medicago truncatula RepID=G7LHL5_MEDTR	0	99.77	AT5G22130.1 | Symbols: PNT1 | mannosyltransferase family protein | chr5:7337486-7339831 REVERSE LENGTH=450	0	99.08	GO:0006506 GO:0009790 GO:0009832 GO:0030244 GO:0051301	GPI anchor biosynthetic process; "embryo development"; "plant-type cell wall biogenesis"; "cellulose biosynthetic process"; "cell division"	GO:0000030 GO:0016757 GO:0016758 GO:0051751	mannosyltransferase activity; "transferase activity, transferring glycosyl groups"; "transferase activity, transferring hexosyl groups"; "alpha-1,4-mannosyltransferase activity"	GO:0005739 GO:0005789 GO:0016021	mitochondrion; "endoplasmic reticulum membrane"; "integral to membrane"	PF05007	Mannosyltransferase (PIG-M)	PTHR12886	PIG-M MANNOSYLTRANSFERASE	KOG3893	Mannosyltransferase	2.4.1.-	Hexosyltransferases	K05284	phosphatidylinositol_glycan,_class_M_[EC:2.4.1.-]
Glyma08g16990	63	NA	NA	NA	NA	NA	NA	NA	NA	NA	NA	NA	NA	NA	NA	NA	NA	NA	NA	NA	NA	NA	NA	NA	NA	NA
Glyma08g17000	314	UniRef100_I1KTS5 Uncharacterized protein n=1 Tax=Glycine max RepID=I1KTS5_SOYBN	0	99.68	UniRef100_O65751 40S ribosomal protein SA n=1 Tax=Cicer arietinum RepID=RSSA_CICAR	5e-172	98.09	AT3G04770.2 | Symbols: RPSAb | 40s ribosomal protein SA B | chr3:1309544-1310846 REVERSE LENGTH=280	9e-148	85.35	GO:0000028 GO:0000447 GO:0000461 GO:0006407 GO:0006412 GO:0006606	ribosomal small subunit assembly; "endonucleolytic cleavage in ITS1 to separate SSU-rRNA from 5.8S rRNA and LSU-rRNA from tricistronic rRNA transcript (SSU-rRNA, 5.8S rRNA, LSU-rRNA)"; "endonucleolytic cleavage to generate mature 3'-end of SSU-rRNA from (SSU-rRNA, 5.8S rRNA, LSU-rRNA)"; "rRNA export from nucleus"; "translation"; "protein import into nucleus"	GO:0003735	structural constituent of ribosome	GO:0005737 GO:0009507 GO:0016020 GO:0022626 GO:0022627 GO:0030686	cytoplasm; "chloroplast"; "membrane"; "cytosolic ribosome"; "cytosolic small ribosomal subunit"; "90S preribosome"	PF00318	Ribosomal protein S2	PTHR11489 PTHR11489:SF7	RIBOSOMAL PROTEIN S2, EUKARYOTIC AND ARCHAEAL FORM; "40S RIBOSOMAL PROTEIN SA"	KOG0830	40S_ribosomal_protein_SA_(P40)/Laminin_receptor_1	NA	NA	NA	NA
Glyma08g17010	424	UniRef100_I1KTS6 Uncharacterized protein n=1 Tax=Glycine max RepID=I1KTS6_SOYBN	0	99.76	UniRef100_G7IT44 ATP-citrate synthase n=1 Tax=Medicago truncatula RepID=G7IT44_MEDTR	0	99.76	AT1G10670.4 | Symbols: ACLA-1 | ATP-citrate lyase A-1 | chr1:3535787-3538098 FORWARD LENGTH=423	0	99.76	GO:0000271 GO:0006084 GO:0006085 GO:0006633 GO:0007568 GO:0009825 GO:0009911 GO:0009932 GO:0010025 GO:0010817 GO:0015995 GO:0016117 GO:0019252 GO:0019344 GO:0030244 GO:0043481 GO:0045793 GO:0045995 GO:0048193 GO:0048366 GO:0048767 GO:0071555	polysaccharide biosynthetic process; "acetyl-CoA metabolic process"; "acetyl-CoA biosynthetic process"; "fatty acid biosynthetic process"; "aging"; "multidimensional cell growth"; "positive regulation of flower development"; "cell tip growth"; "wax biosynthetic process"; "regulation of hormone levels"; "chlorophyll biosynthetic process"; "carotenoid biosynthetic process"; "starch biosynthetic pro…	GO:0003878 GO:0005524 GO:0016874	ATP citrate synthase activity; "ATP binding"; "ligase activity"	GO:0005737 GO:0005829 GO:0009346	cytoplasm; "cytosol"; "citrate lyase complex"	PF08442	ATP-grasp domain	PTHR23118	ATP-CITRATE SYNTHASE	KOG1447 KOG1254	GTP-specific_succinyl-CoA_synthetase,_beta_subunit ATP-citrate_lyase	2.3.3.8	ATP_citrate_synthase	K01648	ATP_citrate_(pro-S)-lyase_[EC:2.3.3.8]
Glyma08g17020	169	UniRef100_I1KTS8 Uncharacterized protein n=2 Tax=Glycine max RepID=I1KTS8_SOYBN	2e-121	99.41	UniRef100_B6T7L5 THAP domain-containing protein 4 n=1 Tax=Zea mays RepID=B6T7L5_MAIZE	6e-79	99.41	AT1G79260.1 | Symbols: | CONTAINS InterPro DOMAIN/s: Domain of unknown function DUF1794 (InterPro:IPR014878); Has 30201 Blast hits to 17322 proteins in 780 species: Archae - 12; Bacteria - 1396; Metazoa - 17338; Fungi - 3422; Plants - 5037; Viruses - 0; Other Eukaryotes - 2996 (source: NCBI BLink). | chr1:29813282-29814066 FORWARD LENGTH=166	1e-76	94.08	GO:0008150	biological process	GO:0003674	molecular function	GO:0005829 GO:0009507	cytosol; "chloroplast"	PF08768	Domain of unknown function (DUF1794)	PTHR15854	THAP4 PROTEIN	KOG3371	Uncharacterized_conserved_protein	NA	NA	NA	NA
Glyma08g17030	159	UniRef100_I1KTS9 Uncharacterized protein n=1 Tax=Glycine max RepID=I1KTS9_SOYBN	1e-109	99.37	UniRef100_G7IT38 Mediator of RNA polymerase II transcription subunit n=1 Tax=Medicago truncatula RepID=G7IT38_MEDTR	7e-82	81.76	AT1G07950.1 | Symbols: MED22B | Surfeit locus protein 5 subunit 22 of Mediator complex | chr1:2466061-2466982 REVERSE LENGTH=154	6e-57	82.39	GO:0006357	regulation of transcription from RNA polymerase II promoter	GO:0001104	RNA polymerase II transcription cofactor activity	GO:0005634 GO:0016592	nucleus; "mediator complex"	PF06179	Surfeit locus protein 5 subunit 22 of Mediator complex	PTHR12434 PTHR12434:SF3	FAMILY NOT NAMED; "SUBFAMILY NOT NAMED"	KOG3304	Surfeit_family_protein_5	NA	NA	NA	NA
Glyma08g17040	643	UniRef100_UPI000233827F UPI000233827F related cluster n=1 Tax=unknown RepID=UPI000233827F	0	99.84	UniRef100_D7MQ71 Pentatricopeptide repeat-containing protein n=1 Tax=Arabidopsis lyrata subsp. lyrata RepID=D7MQ71_ARALL	0	98.29	AT5G50390.1 | Symbols: | Pentatricopeptide repeat (PPR-like) superfamily protein | chr5:20520789-20522980 REVERSE LENGTH=701	0	98.29	GO:0008150	biological process	NA	NA	GO:0009507	chloroplast	PF01535	PPR repeat	PTHR24015 PTHR24015:SF140	FAMILY NOT NAMED; "SUBFAMILY NOT NAMED"	NA	NA	NA	NA	NA	NA
Glyma08g17053	157	UniRef100_UPI0002338E5C UPI0002338E5C related cluster n=1 Tax=unknown RepID=UPI0002338E5C	9e-47	92.99	UniRef100_G7KK85 Pentatricopeptide repeat-containing protein n=1 Tax=Medicago truncatula RepID=G7KK85_MEDTR	2e-38	94.27	AT1G62720.1 | Symbols: | Pentatricopeptide repeat (PPR-like) superfamily protein | chr1:23227574-23229031 FORWARD LENGTH=485	4e-21	96.82	GO:0009845	seed germination	NA	NA	GO:0005739	mitochondrion	PF01535	PPR repeat	PTHR24015	FAMILY NOT NAMED	NA	NA	NA	NA	NA	NA
Glyma08g17066	587	UniRef100_I1MJH2 Uncharacterized protein n=2 Tax=Glycine max RepID=I1MJH2_SOYBN	0	87.73	UniRef100_G7IT37 Protein kinase n=1 Tax=Medicago truncatula RepID=G7IT37_MEDTR	0	98.64	AT1G79250.2 | Symbols: AGC1.7 | AGC kinase 1.7 | chr1:29810336-29812186 REVERSE LENGTH=555	0	73.25	GO:0006468 GO:0009826 GO:0009827 GO:0009860	protein phosphorylation; "unidimensional cell growth"; "plant-type cell wall modification"; "pollen tube growth"	GO:0004672 GO:0004674 GO:0005515 GO:0005524 GO:0016301 GO:0016772	protein kinase activity; "protein serine/threonine kinase activity"; "protein binding"; "ATP binding"; "kinase activity"; "transferase activity, transferring phosphorus-containing groups"	NA	NA	PF00069	Protein kinase domain	PTHR24351 PTHR24351:SF88	RIBOSOMAL PROTEIN S6 KINASE; ""	KOG0610	Putative_serine/threonine_protein_kinase	NA	NA	NA	NA
Glyma08g17080	417	UniRef100_I1KTT3 Isocitrate dehydrogenase [NADP] n=1 Tax=Glycine max RepID=I1KTT3_SOYBN	0	99.76	UniRef100_I1KTT3 Isocitrate dehydrogenase [NADP] n=1 Tax=Glycine max RepID=I1KTT3_SOYBN	0	99.76	AT1G65930.1 | Symbols: cICDH | cytosolic NADP+-dependent isocitrate dehydrogenase | chr1:24539088-24541861 FORWARD LENGTH=410	0	98.8	GO:0006094 GO:0006096 GO:0006102 GO:0006511 GO:0006739 GO:0006833 GO:0006970 GO:0006972 GO:0007030 GO:0008152 GO:0009266 GO:0009651 GO:0009853 GO:0010043 GO:0042742 GO:0046686 GO:0051049 GO:0051788 GO:0055114 GO:0080129	gluconeogenesis; "glycolysis"; "isocitrate metabolic process"; "ubiquitin-dependent protein catabolic process"; "NADP metabolic process"; "water transport"; "response to osmotic stress"; "hyperosmotic response"; "Golgi organization"; "metabolic process"; "response to temperature stimulus"; "response to salt stress"; "photorespiration"; "response to zinc ion"; "defense response to bacterium"; "res…	GO:0000287 GO:0004450 GO:0005507 GO:0016616 GO:0051287	magnesium ion binding; "isocitrate dehydrogenase (NADP+) activity"; "copper ion binding"; "oxidoreductase activity, acting on the CH-OH group of donors, NAD or NADP as acceptor"; "NAD binding"	GO:0005829 GO:0005886 GO:0009506 GO:0009507 GO:0009570 GO:0048046	cytosol; "plasma membrane"; "plasmodesma"; "chloroplast"; "chloroplast stroma"; "apoplast"	PF00180	Isocitrate/isopropylmalate dehydrogenase	PTHR11822	NADP-SPECIFIC ISOCITRATE DEHYDROGENASE	KOG1526	NADP-dependent_isocitrate_dehydrogenase	1.1.1.42	Isocitrate_dehydrogenase_(NADP+)	K00031	isocitrate_dehydrogenase_[EC:1.1.1.42]
Glyma08g17091	268	UniRef100_UPI0002338B68 UPI0002338B68 related cluster n=1 Tax=unknown RepID=UPI0002338B68	0	99.63	UniRef100_G7IT34 Membrane protein, putative n=1 Tax=Medicago truncatula RepID=G7IT34_MEDTR	1e-121	99.63	AT3G12685.1 | Symbols: | Acid phosphatase/vanadium-dependent haloperoxidase-related protein | chr3:4029245-4030261 REVERSE LENGTH=213	9e-67	98.88	GO:0008150	biological process	GO:0003674	molecular function	GO:0005886	plasma membrane	PF02681	Divergent PAP2 family	NA	NA	NA	NA	NA	NA	NA	NA
Glyma08g17100	123	UniRef100_Q9SWB2 Seed maturation protein PM41 n=1 Tax=Glycine max RepID=Q9SWB2_SOYBN	1e-48	63.41	UniRef100_Q9SWB2 Seed maturation protein PM41 n=1 Tax=Glycine max RepID=Q9SWB2_SOYBN	1e-48	63.41	AT2G21820.1 | Symbols: | unknown protein; Has 45 Blast hits to 45 proteins in 13 species: Archae - 0; Bacteria - 0; Metazoa - 0; Fungi - 0; Plants - 45; Viruses - 0; Other Eukaryotes - 0 (source: NCBI BLink). | chr2:9302983-9303219 REVERSE LENGTH=78	4e-36	63.41	GO:0008150	biological process	GO:0003674	molecular function	GO:0005737	cytoplasm	NA	NA	NA	NA	NA	NA	NA	NA	NA	NA
Glyma08g17110	771	UniRef100_I1KTT6 Uncharacterized protein n=1 Tax=Glycine max RepID=I1KTT6_SOYBN	0	99.87	UniRef100_A2Q3K0 AAA ATPase; ABC transporter, transmembrane region, type 1 n=1 Tax=Medicago truncatula RepID=A2Q3K0_MEDTR	0	81.32	AT1G54350.1 | Symbols: | ABC transporter family protein | chr1:20286917-20290245 FORWARD LENGTH=706	0	91.05	GO:0000023 GO:0006810 GO:0019252 GO:0019761 GO:0055085	maltose metabolic process; "transport"; "starch biosynthetic process"; "glucosinolate biosynthetic process"; "transmembrane transport"	GO:0000166 GO:0005524 GO:0016887 GO:0017111 GO:0042626	nucleotide binding; "ATP binding"; "ATPase activity"; "nucleoside-triphosphatase activity"; "ATPase activity, coupled to transmembrane movement of substances"	GO:0005886 GO:0009507 GO:0016020 GO:0016021	plasma membrane; "chloroplast"; "membrane"; "integral to membrane"	PF00005 PF06472	ABC transporter; "ABC transporter transmembrane region 2"	PTHR11384 PTHR11384:SF18	ATP-BINDING CASSETTE TRANSPORTER-RELATED; "SUBFAMILY NOT NAMED"	KOG0060	Long-chain_acyl-CoA_transporter,_ABC_superfamily_(involved_in_peroxisome_organization_and_biogenesis)	NA	NA	NA	NA
Glyma08g17120	611	UniRef100_I1KTT7 Uncharacterized protein n=2 Tax=Glycine max RepID=I1KTT7_SOYBN	0	99.84	UniRef100_A2Q3J8 Glutamine amidotransferase, class I, active site n=1 Tax=Medicago truncatula RepID=A2Q3J8_MEDTR	0	99.84	AT3G12670.1 | Symbols: emb2742 | CTP synthase family protein | chr3:4020351-4024086 REVERSE LENGTH=591	0	99.02	GO:0000478 GO:0006221 GO:0009793 GO:0046686	endonucleolytic cleavage involved in rRNA processing; "pyrimidine nucleotide biosynthetic process"; "embryo development ending in seed dormancy"; "response to cadmium ion"	GO:0003883	CTP synthase activity	GO:0005737 GO:0005829	cytoplasm; "cytosol"	PF00117 PF06418	Glutamine amidotransferase class-I; "CTP synthase N-terminus"	PTHR11550	CTP SYNTHASE	KOG2387	CTP_synthase_(UTP-ammonia_lyase)	6.3.4.2	CTP_synthase	K01937	CTP_synthase_[EC:6.3.4.2]
Glyma08g17130	58	NA	NA	NA	NA	NA	NA	NA	NA	NA	NA	NA	NA	NA	NA	NA	NA	NA	NA	NA	NA	NA	NA	NA	NA	NA
Glyma08g17140	329	UniRef100_I1KTT9 Uncharacterized protein n=1 Tax=Glycine max RepID=I1KTT9_SOYBN	0	99.7	UniRef100_A2Q3I9 NAC domain-containing protein n=1 Tax=Medicago truncatula RepID=A2Q3I9_MEDTR	7e-180	99.7	AT1G79580.3 | Symbols: SMB | NAC (No Apical Meristem) domain transcriptional regulator superfamily protein | chr1:29941020-29942925 REVERSE LENGTH=371	5e-114	99.39	GO:0003002 GO:0006355 GO:0007275 GO:0009834 GO:0010455 GO:0048829	regionalization; "regulation of transcription, DNA-dependent"; "multicellular organismal development"; "secondary cell wall biogenesis"; "positive regulation of cell fate commitment"; "root cap development"	GO:0003677 GO:0003700	DNA binding; "sequence-specific DNA binding transcription factor activity"	GO:0005634	nucleus	PF02365	No apical meristem (NAM) protein	NA	NA	NA	NA	NA	NA	NA	NA
Glyma08g17160	342	UniRef100_UPI0002338B69 UPI0002338B69 related cluster n=1 Tax=unknown RepID=UPI0002338B69	0	99.71	UniRef100_B9SLW1 S-adenosylmethionine-dependent methyltransferase, putative n=1 Tax=Ricinus communis RepID=B9SLW1_RICCO	1e-123	85.38	AT5G44600.1 | Symbols: | S-adenosyl-L-methionine-dependent methyltransferases superfamily protein | chr5:17989867-17991519 FORWARD LENGTH=333	5e-109	90.94	GO:0008150	biological process	NA	NA	GO:0009507	chloroplast	NA	NA	NA	NA	NA	NA	NA	NA	NA	NA
Glyma08g17170	1657	UniRef100_UPI0002338B6B UPI0002338B6B related cluster n=1 Tax=unknown RepID=UPI0002338B6B	0	99.94	UniRef100_G7IQR6 Myosin XI-F n=1 Tax=Medicago truncatula RepID=G7IQR6_MEDTR	0	99.94	AT2G31900.1 | Symbols: XIF, ATXIF, ATMYO5 | myosin-like protein XIF | chr2:13560760-13569623 REVERSE LENGTH=1556	0	99.64	GO:0009624 GO:0010089 GO:0030048 GO:0044036 GO:0051645 GO:0051646 GO:0060151	response to nematode; "xylem development"; "actin filament-based movement"; "cell wall macromolecule metabolic process"; "Golgi localization"; "mitochondrion localization"; "peroxisome localization"	GO:0003774 GO:0005515 GO:0005524	motor activity; "protein binding"; "ATP binding"	GO:0016459 GO:0016461	myosin complex; "unconventional myosin complex"	PF01843 PF00612 PF00063 PF02736	DIL domain; "IQ calmodulin-binding motif"; "Myosin head (motor domain)"; "Myosin N-terminal SH3-like domain"	PTHR13140 PTHR13140:SF36	MYOSIN; "MYOSIN I, HIGH MOLECULAR WEIGHT FORM"	KOG0160	Myosin_class_V_heavy_chain	NA	NA	NA	NA
Glyma08g17180	515	UniRef100_I1KTU2 Uncharacterized protein n=1 Tax=Glycine max RepID=I1KTU2_SOYBN	0	92.04	UniRef100_B6U8T6 Carboxyl-terminal peptidase n=1 Tax=Zea mays RepID=B6U8T6_MAIZE	0	72.82	AT1G55360.1 | Symbols: | Protein of Unknown Function (DUF239) | chr1:20666526-20668502 REVERSE LENGTH=422	0	74.56	GO:0008150 GO:0019344	biological process; "cysteine biosynthetic process"	NA	NA	GO:0005576	extracellular region	PF03080	Arabidopsis proteins of unknown function	NA	NA	NA	NA	NA	NA	NA	NA
Glyma08g17190	140	UniRef100_I1KTU5 Uncharacterized protein n=1 Tax=Glycine max RepID=I1KTU5_SOYBN	6e-91	99.29	UniRef100_G7IQQ8 Non-specific lipid-transfer protein n=1 Tax=Medicago truncatula RepID=G7IQQ8_MEDTR	1e-55	82.14	AT2G18370.1 | Symbols: | Bifunctional inhibitor/lipid-transfer protein/seed storage 2S albumin superfamily protein | chr2:7980687-7981475 FORWARD LENGTH=116	5e-38	75	GO:0006869	lipid transport	GO:0008289	lipid binding	GO:0005576	extracellular region	PF00234	Protease inhibitor/seed storage/LTP family	NA	NA	NA	NA	NA	NA	NA	NA
Glyma08g17200	587	UniRef100_I1KTU6 Uncharacterized protein n=2 Tax=Glycine max RepID=I1KTU6_SOYBN	0	98.47	UniRef100_G7IQQ5 Beta-hexosaminidase subunit beta n=1 Tax=Medicago truncatula RepID=G7IQQ5_MEDTR	0	94.04	AT1G05590.1 | Symbols: HEXO2, ATHEX3 | beta-hexosaminidase 2 | chr1:1669871-1671686 FORWARD LENGTH=580	0	98.81	GO:0005975	carbohydrate metabolic process	GO:0003824 GO:0004553 GO:0004563 GO:0015929 GO:0035251 GO:0043169	catalytic activity; "hydrolase activity, hydrolyzing O-glycosyl compounds"; "beta-N-acetylhexosaminidase activity"; "hexosaminidase activity"; "UDP-glucosyltransferase activity"; "cation binding"	GO:0005576 GO:0005886	extracellular region; "plasma membrane"	PF02838 PF00728	Glycosyl hydrolase family 20, domain 2; "Glycosyl hydrolase family 20, catalytic domain"	PTHR22600	BETA-HEXOSAMINIDASE	KOG2499	Beta-N-acetylhexosaminidase	3.2.1.52	Beta-N-acetylhexosaminidase	K12373	hexosaminidase_[EC:3.2.1.52]
Glyma08g17220	563	UniRef100_UPI00023383E4 UPI00023383E4 related cluster n=1 Tax=unknown RepID=UPI00023383E4	0	99.82	UniRef100_D5KXM9 Increased size exclusion limit 1a n=1 Tax=Nicotiana benthamiana RepID=D5KXM9_NICBE	0	98.22	AT1G12770.1 | Symbols: ISE1, EMB1586 | P-loop containing nucleoside triphosphate hydrolases superfamily protein | chr1:4351888-4353543 FORWARD LENGTH=551	0	98.93	GO:0009663 GO:0009793 GO:0010497	plasmodesma organization; "embryo development ending in seed dormancy"; "plasmodesmata-mediated intercellular transport"	GO:0003676 GO:0003724 GO:0004386 GO:0005524 GO:0008026	nucleic acid binding; "RNA helicase activity"; "helicase activity"; "ATP binding"; "ATP-dependent helicase activity"	GO:0005739 GO:0009507	mitochondrion; "chloroplast"	PF00271 PF00270	Helicase conserved C-terminal domain; "DEAD/DEAH box helicase"	PTHR24031 PTHR24031:SF8	FAMILY NOT NAMED; "SUBFAMILY NOT NAMED"	KOG0327	Translation_initiation_factor_4F,_helicase_subunit_(eIF-4A)_and_related_helicases	NA	NA	NA	NA
Glyma08g17230	508	UniRef100_UPI0002338B6D UPI0002338B6D related cluster n=1 Tax=unknown RepID=UPI0002338B6D	0	99.8	UniRef100_Q9LTW4 Aspartyl protease family protein n=2 Tax=Arabidopsis thaliana RepID=Q9LTW4_ARATH	5e-114	87.99	AT3G12700.1 | Symbols: | Eukaryotic aspartyl protease family protein | chr3:4037136-4039043 FORWARD LENGTH=461	1e-116	87.99	GO:0005975 GO:0006508 GO:0010019	carbohydrate metabolic process; "proteolysis"; "chloroplast-nucleus signaling pathway"	GO:0004190	aspartic-type endopeptidase activity	GO:0005576 GO:0005634 GO:0009507	extracellular region; "nucleus"; "chloroplast"	PF00026	Eukaryotic aspartyl protease	PTHR13683 PTHR13683:SF98	ASPARTYL PROTEASES; "CHLOROPLAST NUCLEIOD DNA-BINDING-RELATED"	KOG1339	Aspartyl_protease	NA	NA	NA	NA
Glyma08g17240	580	UniRef100_UPI000189D6CD UPI000189D6CD related cluster n=1 Tax=unknown RepID=UPI000189D6CD	0	99.83	UniRef100_G7IT77 YTH domain family protein n=2 Tax=Medicago truncatula RepID=G7IT77_MEDTR	0	99.83	AT1G79270.1 | Symbols: ECT8 | evolutionarily conserved C-terminal region 8 | chr1:29816157-29818811 FORWARD LENGTH=528	3e-131	86.72	GO:0008150 GO:0009611 GO:0009805 GO:0009963	biological process; "response to wounding"; "coumarin biosynthetic process"; "positive regulation of flavonoid biosynthetic process"	GO:0003674	molecular function	GO:0005634	nucleus	PF04146	YT521-B-like family	PTHR12357 PTHR12357:SF6	YTH (YT521-B HOMOLOGY) DOMAIN-CONTAINING; "YTH DOMAIN-CONTAINING"	KOG1901	Uncharacterized_high-glucose-regulated_protein	NA	NA	NA	NA
Glyma08g17255	2089	UniRef100_UPI0002338B6E UPI0002338B6E related cluster n=1 Tax=unknown RepID=UPI0002338B6E	0	99.95	UniRef100_G7IT80 Nuclear-pore anchor n=1 Tax=Medicago truncatula RepID=G7IT80_MEDTR	0	80.85	AT1G79280.1 | Symbols: NUA, AtTPR | nuclear pore anchor | chr1:29819176-29832809 REVERSE LENGTH=2093	0	99.38	GO:0000226 GO:0006606 GO:0009910 GO:0016973 GO:0033234 GO:0048443 GO:0051322	microtubule cytoskeleton organization; "protein import into nucleus"; "negative regulation of flower development"; "poly(A)+ mRNA export from nucleus"; "negative regulation of protein sumoylation"; "stamen development"; "anaphase"	GO:0005515	protein binding	GO:0005634 GO:0005635 GO:0005643 GO:0005730 GO:0005829 GO:0009506 GO:0009507	nucleus; "nuclear envelope"; "nuclear pore"; "nucleolus"; "cytosol"; "plasmodesma"; "chloroplast"	PF07926	TPR/MLP1/MLP2-like protein	NA	NA	KOG4674	Uncharacterized_conserved_coiled-coil_protein	NA	NA	K09291	nucleoprotein_TPR
Glyma08g17270	455	UniRef100_I1KTV1 Uncharacterized protein n=1 Tax=Glycine max RepID=I1KTV1_SOYBN	0	99.78	UniRef100_G1FTR5 Nodulin 41 n=1 Tax=Phaseolus vulgaris RepID=G1FTR5_PHAVU	3e-133	99.12	AT2G35615.1 | Symbols: | Eukaryotic aspartyl protease family protein | chr2:14959391-14960734 FORWARD LENGTH=447	3e-86	98.46	GO:0006508	proteolysis	GO:0004190	aspartic-type endopeptidase activity	GO:0005576	extracellular region	PF00026	Eukaryotic aspartyl protease	PTHR13683 PTHR13683:SF98	ASPARTYL PROTEASES; "CHLOROPLAST NUCLEIOD DNA-BINDING-RELATED"	KOG1339	Aspartyl_protease	NA	NA	NA	NA
Glyma08g17280	401	UniRef100_I1KTV2 Uncharacterized protein n=1 Tax=Glycine max RepID=I1KTV2_SOYBN	0	99.75	UniRef100_G7IT82 DNA-3-methyladenine glycosylase n=2 Tax=Medicago truncatula RepID=G7IT82_MEDTR	0	97.26	AT3G12710.1 | Symbols: | DNA glycosylase superfamily protein | chr3:4040572-4041828 REVERSE LENGTH=312	4e-140	69.08	GO:0006281 GO:0006284 GO:0006306	DNA repair; "base-excision repair"; "DNA methylation"	GO:0003824 GO:0008725	catalytic activity; "DNA-3-methyladenine glycosylase activity"	NA	NA	PF03352	Methyladenine glycosylase	NA	NA	NA	NA	3.2.2.20	DNA-3-methyladenine_glycosylase_I	K01246	DNA-3-methyladenine_glycosylase_I_[EC:3.2.2.20]
Glyma08g17290	281	UniRef100_I1KTV3 Uncharacterized protein n=1 Tax=Glycine max RepID=I1KTV3_SOYBN	0	99.64	UniRef100_D7MRW5 Ribosomal protein L15 family protein n=1 Tax=Arabidopsis lyrata subsp. lyrata RepID=D7MRW5_ARALL	2e-133	98.58	AT5G64670.1 | Symbols: | Ribosomal protein L18e/L15 superfamily protein | chr5:25852535-25853880 REVERSE LENGTH=281	1e-135	98.58	GO:0006354 GO:0006412 GO:0009220 GO:0042254	DNA-dependent transcription, elongation; "translation"; "pyrimidine ribonucleotide biosynthetic process"; "ribosome biogenesis"	GO:0003735	structural constituent of ribosome	GO:0005739 GO:0005840 GO:0015934	mitochondrion; "ribosome"; "large ribosomal subunit"	PF00828	Ribosomal protein L18e/L15	PTHR12934 PTHR12934:SF1	50S RIBOSOMAL PROTEIN L15; "gb def: y92h12br.8.p [caenorhabditis elegans]"	KOG0846	Mitochondrial/chloroplast_ribosomal_protein_L15/L10	NA	NA	NA	NA
Glyma08g17300	341	UniRef100_I1KTV4 Uncharacterized protein n=1 Tax=Glycine max RepID=I1KTV4_SOYBN	0	99.71	UniRef100_G7JMV9 Peroxidase n=1 Tax=Medicago truncatula RepID=G7JMV9_MEDTR	0	99.71	AT1G30870.1 | Symbols: | Peroxidase superfamily protein | chr1:10991535-10992885 FORWARD LENGTH=349	2e-110	87.68	GO:0006979 GO:0010054 GO:0055114	response to oxidative stress; "trichoblast differentiation"; "oxidation-reduction process"	GO:0004601 GO:0020037	peroxidase activity; "heme binding"	GO:0005576	extracellular region	PF00141	Peroxidase	NA	NA	NA	NA	NA	NA	NA	NA
Glyma08g17310	576	UniRef100_UPI0002338CD6 UPI0002338CD6 related cluster n=1 Tax=unknown RepID=UPI0002338CD6	0	99.83	UniRef100_Q9SY74 Zinc finger CCCH domain-containing protein 5 n=1 Tax=Arabidopsis thaliana RepID=C3H5_ARATH	4e-162	66.15	AT1G10320.1 | Symbols: | Zinc finger C-x8-C-x5-C-x3-H type family protein | chr1:3384164-3388373 REVERSE LENGTH=757	8e-165	66.15	NA	NA	GO:0000166 GO:0003676 GO:0003723 GO:0008270	nucleotide binding; "nucleic acid binding"; "RNA binding"; "zinc ion binding"	GO:0005634	nucleus	PF00076 PF00642	RNA recognition motif. (a.k.a. RRM, RBD, or RNP domain); "Zinc finger C-x8-C-x5-C-x3-H type (and similar)"	PTHR12620	U2 SNRNP AUXILIARY FACTOR, SMALL SUBUNIT	NA	NA	NA	NA	NA	NA
Glyma08g17320	352	UniRef100_I1KTV6 Uncharacterized protein (Fragment) n=1 Tax=Glycine max RepID=I1KTV6_SOYBN	0	94.89	UniRef100_G7IGU4 Metacaspase type II n=1 Tax=Medicago truncatula RepID=G7IGU4_MEDTR	2e-126	99.72	AT1G79330.1 | Symbols: AMC6, ATMCP2B, ATMC5, MC5 | metacaspase 5 | chr1:29838722-29840137 FORWARD LENGTH=410	1e-106	99.72	GO:0006508 GO:0043068	proteolysis; "positive regulation of programmed cell death"	GO:0004197	cysteine-type endopeptidase activity	GO:0005576 GO:0009507	extracellular region; "chloroplast"	PF00656	Caspase domain	NA	NA	KOG1546	Metacaspase_involved_in_regulation_of_apoptosis	NA	NA	NA	NA
Glyma08g17330	452	UniRef100_I1KTV7 Uncharacterized protein n=1 Tax=Glycine max RepID=I1KTV7_SOYBN	0	99.78	UniRef100_G7KJ99 E3 ubiquitin-protein ligase RGLG2 n=1 Tax=Medicago truncatula RepID=G7KJ99_MEDTR	0	99.78	AT1G79380.1 | Symbols: | Ca(2)-dependent phospholipid-binding protein (Copine) family | chr1:29860812-29863023 FORWARD LENGTH=401	0	80.09	GO:0006487 GO:0006816 GO:0009611 GO:0009690 GO:0009867 GO:0042742	protein N-linked glycosylation; "calcium ion transport"; "response to wounding"; "cytokinin metabolic process"; "jasmonic acid mediated signaling pathway"; "defense response to bacterium"	GO:0004842 GO:0008270	ubiquitin-protein ligase activity; "zinc ion binding"	GO:0005886	plasma membrane	PF07002	Copine	PTHR10857 PTHR10857:SF11	COPINE; "COPINE"	KOG4172	Predicted_E3_ubiquitin_ligase	NA	NA	NA	NA
Glyma08g17351	349	UniRef100_UPI0002338CD9 UPI0002338CD9 related cluster n=1 Tax=unknown RepID=UPI0002338CD9	0	99.71	UniRef100_G7IGW3 NAC domain protein n=1 Tax=Medicago truncatula RepID=G7IGW3_MEDTR	0	99.14	AT1G54330.1 | Symbols: ANAC020, NAC020 | NAC domain containing protein 20 | chr1:20279715-20280889 REVERSE LENGTH=301	4e-99	96.56	GO:0006355 GO:0007275	regulation of transcription, DNA-dependent; "multicellular organismal development"	GO:0003677 GO:0003700	DNA binding; "sequence-specific DNA binding transcription factor activity"	GO:0005634	nucleus	PF02365	No apical meristem (NAM) protein	NA	NA	NA	NA	NA	NA	NA	NA
Glyma08g17371	328	UniRef100_UPI0002338CDA UPI0002338CDA related cluster n=1 Tax=unknown RepID=UPI0002338CDA	0	99.7	UniRef100_G7IGW8 Transcription factor Myb n=1 Tax=Medicago truncatula RepID=G7IGW8_MEDTR	2e-128	99.7	AT3G12720.1 | Symbols: ATY53, ATMYB67, MYB67 | myb domain protein 67 | chr3:4043407-4044522 REVERSE LENGTH=307	7e-86	40.55	GO:0006355	regulation of transcription, DNA-dependent	GO:0003677 GO:0003700	DNA binding; "sequence-specific DNA binding transcription factor activity"	GO:0005634	nucleus	PF00249	Myb-like DNA-binding domain	PTHR10641	MYB-RELATED	KOG0048	Transcription_factor,_Myb_superfamily	NA	NA	K09422	myb_proto-oncogene_protein,_plant
Glyma08g17390	386	UniRef100_I1KTV9 Uncharacterized protein n=2 Tax=Glycine max RepID=I1KTV9_SOYBN	0	99.74	UniRef100_Q9SAK6 T8K14.16 n=1 Tax=Arabidopsis thaliana RepID=Q9SAK6_ARATH	0	94.3	AT1G79420.1 | Symbols: | Protein of unknown function (DUF620) | chr1:29871537-29874166 FORWARD LENGTH=417	0	98.7	GO:0008150 GO:0009855 GO:0009887 GO:0010014 GO:0010051 GO:0010073 GO:0048439 GO:0048519	biological process; "determination of bilateral symmetry"; "organ morphogenesis"; "meristem initiation"; "xylem and phloem pattern formation"; "meristem maintenance"; "flower morphogenesis"; "negative regulation of biological process"	GO:0003674	molecular function	GO:0005739	mitochondrion	PF04788	Protein of unknown function (DUF620)	NA	NA	NA	NA	NA	NA	NA	NA
Glyma08g17400	374	UniRef100_I1KTW0 Uncharacterized protein n=1 Tax=Glycine max RepID=I1KTW0_SOYBN	0	99.73	UniRef100_E5L8F7 IPN2 n=1 Tax=Lotus japonicus RepID=E5L8F7_LOTJA	0	99.73	AT1G79430.2 | Symbols: APL, WDY | Homeodomain-like superfamily protein | chr1:29877521-29879135 REVERSE LENGTH=358	2e-122	98.93	GO:0006355 GO:0010088 GO:0010089	regulation of transcription, DNA-dependent; "phloem development"; "xylem development"	GO:0003700	sequence-specific DNA binding transcription factor activity	GO:0005634 GO:0005739	nucleus; "mitochondrion"	PF00249	Myb-like DNA-binding domain	NA	NA	NA	NA	NA	NA	NA	NA
Glyma08g17410	550	UniRef100_I1KTW1 Uncharacterized protein n=1 Tax=Glycine max RepID=I1KTW1_SOYBN	0	99.82	UniRef100_O64861 Expressed protein n=1 Tax=Arabidopsis thaliana RepID=O64861_ARATH	0	97.82	AT2G44260.1 | Symbols: | Plant protein of unknown function (DUF946) | chr2:18295988-18297739 FORWARD LENGTH=553	0	97.82	GO:0006499	N-terminal protein myristoylation	GO:0003674	molecular function	GO:0009507	chloroplast	PF06101	Plant protein of unknown function (DUF946)	PTHR17204 PTHR17204:SF7	PRE-MRNA PROCESSING PROTEIN PRP39-RELATED; "PRE-MRNA PROCESSING-RELATED"	NA	NA	NA	NA	NA	NA
Glyma08g17420	194	UniRef100_I1KTW2 Uncharacterized protein n=1 Tax=Glycine max RepID=I1KTW2_SOYBN	2e-139	99.48	UniRef100_G7J9B2 Histone deacetylase n=1 Tax=Medicago truncatula RepID=G7J9B2_MEDTR	4e-19	88.66	NA	NA	NA	NA	NA	NA	NA	NA	NA	NA	NA	NA	NA	NA	NA	NA	NA	NA	NA
Glyma08g17450	538	UniRef100_I1KTW3 Uncharacterized protein n=1 Tax=Glycine max RepID=I1KTW3_SOYBN	0	99.81	UniRef100_B1Q3F8 Succinic semialdehyde dehydrogenase n=1 Tax=Solanum lycopersicum RepID=B1Q3F8_SOLLC	0	98.14	AT1G79440.1 | Symbols: ALDH5F1, SSADH1, SSADH | aldehyde dehydrogenase 5F1 | chr1:29882525-29887275 REVERSE LENGTH=528	0	92.38	GO:0006333 GO:0006540 GO:0008152 GO:0009408 GO:0009416 GO:0009450 GO:0055114 GO:0072593	chromatin assembly or disassembly; "glutamate decarboxylation to succinate"; "metabolic process"; "response to heat"; "response to light stimulus"; "gamma-aminobutyric acid catabolic process"; "oxidation-reduction process"; "reactive oxygen species metabolic process"	GO:0004028 GO:0004777 GO:0005507 GO:0016491 GO:0016620 GO:0051287	3-chloroallyl aldehyde dehydrogenase activity; "succinate-semialdehyde dehydrogenase (NAD+) activity"; "copper ion binding"; "oxidoreductase activity"; "oxidoreductase activity, acting on the aldehyde or oxo group of donors, NAD or NADP as acceptor"; "NAD binding"	GO:0005739 GO:0005759 GO:0009507 GO:0009570	mitochondrion; "mitochondrial matrix"; "chloroplast"; "chloroplast stroma"	PF00171	Aldehyde dehydrogenase family	PTHR11699 PTHR11699:SF49	ALDEHYDE DEHYDROGENASE-RELATED; "GLYCERALDEHYDE 3-PHOSPHATE DEHYDROGENASE"	KOG2451	Aldehyde_dehydrogenase	1.2.1.16	Succinate-semialdehyde_dehydrogenase_(NAD(P)+)	K00135	succinate-semialdehyde_dehydrogenase_(NADP+)_[EC:1.2.1.16]
Glyma08g17460	345	UniRef100_I1KTW4 Uncharacterized protein n=2 Tax=Glycine max RepID=I1KTW4_SOYBN	0	99.71	UniRef100_D7KNX3 LEM3 (Ligand-effect modulator 3) family protein n=1 Tax=Arabidopsis lyrata subsp. lyrata RepID=D7KNX3_ARALL	0	94.78	AT1G54320.1 | Symbols: | LEM3 (ligand-effect modulator 3) family protein / CDC50 family protein | chr1:20275732-20277793 REVERSE LENGTH=349	0	94.78	GO:0006944 GO:0008150 GO:0009627 GO:0009697 GO:0048193	cellular membrane fusion; "biological process"; "systemic acquired resistance"; "salicylic acid biosynthetic process"; "Golgi vesicle transport"	GO:0005515	protein binding	GO:0005794 GO:0016020	Golgi apparatus; "membrane"	PF03381	LEM3 (ligand-effect modulator 3) family / CDC50 family	PTHR10926 PTHR10926:SF0	CDC50-RELATED; "SUBFAMILY NOT NAMED"	KOG2952	Cell_cycle_control_protein	NA	NA	NA	NA
Glyma08g17470	835	UniRef100_I1KTW7 Uncharacterized protein n=2 Tax=Glycine max RepID=I1KTW7_SOYBN	0	88.5	UniRef100_G7IV06 Ent-kaur-16-ene synthase n=1 Tax=Medicago truncatula RepID=G7IV06_MEDTR	0	93.17	AT1G79460.1 | Symbols: GA2, KS, ATKS, ATKS1, KS1 | Terpenoid cyclases/Protein prenyltransferases superfamily protein | chr1:29890568-29894436 FORWARD LENGTH=785	0	92.46	GO:0008152 GO:0009686 GO:0009740 GO:0042546	metabolic process; "gibberellin biosynthetic process"; "gibberellic acid mediated signaling pathway"; "cell wall biogenesis"	GO:0000287 GO:0009899 GO:0010333 GO:0016829	magnesium ion binding; "ent-kaurene synthase activity"; "terpene synthase activity"; "lyase activity"	GO:0009507 GO:0009536 GO:0009570	chloroplast; "plastid"; "chloroplast stroma"	PF01397 PF03936	Terpene synthase, N-terminal domain; "Terpene synthase family, metal binding domain"	NA	NA	NA	NA	4.2.3.19	ent-kaurene_synthase	K04121	ent-kaurene_synthase_[EC:4.2.3.19]
Glyma08g17480	217	UniRef100_C6TM04 Uncharacterized protein n=1 Tax=Glycine max RepID=C6TM04_SOYBN	3e-153	99.54	UniRef100_O04527 F20P5.9 protein n=1 Tax=Arabidopsis thaliana RepID=O04527_ARATH	2e-65	99.54	AT1G70190.2 | Symbols: | Ribosomal protein L7/L12, oligomerisation;Ribosomal protein L7/L12, C-terminal/adaptor protein ClpS-like | chr1:26430616-26431242 FORWARD LENGTH=208	4e-68	99.54	GO:0006354 GO:0006412	DNA-dependent transcription, elongation; "translation"	GO:0003735	structural constituent of ribosome	GO:0005622 GO:0005739 GO:0005840 GO:0015934	intracellular; "mitochondrion"; "ribosome"; "large ribosomal subunit"	PF00542	Ribosomal protein L7/L12 C-terminal domain	PTHR11809 PTHR11809:SF6	RIBOSOMAL PROTEIN L7/L12; "gb def: ribosomal protein [arabidopsis thaliana]"	KOG1715	Mitochondrial/chloroplast_ribosomal_protein_L12	NA	NA	NA	NA
Glyma08g17490	336	UniRef100_I1KTW9 Uncharacterized protein n=2 Tax=Glycine max RepID=I1KTW9_SOYBN	0	99.7	UniRef100_Q944T1 Inosine-5'-monophosphate dehydrogenase-like protein (Fragment) n=1 Tax=Glycine max RepID=Q944T1_SOYBN	0	99.7	AT1G16350.1 | Symbols: | Aldolase-type TIM barrel family protein | chr1:5590951-5592872 FORWARD LENGTH=502	0	97.62	GO:0000394 GO:0006177 GO:0009086 GO:0055114	RNA splicing, via endonucleolytic cleavage and ligation; "GMP biosynthetic process"; "methionine biosynthetic process"; "oxidation-reduction process"	GO:0003824 GO:0003938 GO:0016491	catalytic activity; "IMP dehydrogenase activity"; "oxidoreductase activity"	GO:0005829	cytosol	PF00478	IMP dehydrogenase / GMP reductase domain	PTHR11911 PTHR11911:SF6	INOSINE-5-MONOPHOSPHATE DEHYDROGENASE RELATED; "INOSINE-5-MONOPHOSPHATE DEHYDROGENASE"	NA	NA	NA	NA	NA	NA
Glyma08g17511	154	UniRef100_UPI0002338CE1 UPI0002338CE1 related cluster n=1 Tax=unknown RepID=UPI0002338CE1	3e-103	99.35	UniRef100_G7IB18 Glucan endo-1,3-beta-glucosidase n=1 Tax=Medicago truncatula RepID=G7IB18_MEDTR	7e-56	92.86	AT1G79480.2 | Symbols: | Carbohydrate-binding X8 domain superfamily protein | chr1:29897905-29899267 REVERSE LENGTH=396	7e-52	90.91	NA	NA	NA	NA	GO:0005634	nucleus	PF07983	X8 domain	PTHR16631 PTHR16631:SF1	GLUCAN 1,3-BETA-GLUCOSIDASE-RELATED; "GLUCAN 1,3-BETA-GLUCOSIDASE"	NA	NA	NA	NA	NA	NA
Glyma08g17530	362	UniRef100_I1KTX1 Uncharacterized protein n=1 Tax=Glycine max RepID=I1KTX1_SOYBN	0	99.72	UniRef100_Q6VM20 Metal transport protein n=1 Tax=Medicago truncatula RepID=Q6VM20_MEDTR	0	96.41	AT3G12750.1 | Symbols: ZIP1 | zinc transporter 1 precursor | chr3:4051950-4053156 REVERSE LENGTH=355	2e-151	96.69	GO:0006826 GO:0006829 GO:0006833 GO:0010043 GO:0010106 GO:0030001 GO:0055085 GO:0071577	iron ion transport; "zinc ion transport"; "water transport"; "response to zinc ion"; "cellular response to iron ion starvation"; "metal ion transport"; "transmembrane transport"; "zinc ion transmembrane transport"	GO:0005385 GO:0046873	zinc ion transmembrane transporter activity; "metal ion transmembrane transporter activity"	GO:0005886 GO:0016020 GO:0016021	plasma membrane; "membrane"; "integral to membrane"	PF02535	ZIP Zinc transporter	PTHR11040 PTHR11040:SF1	ZINC-IRON TRANSPORTER; "ZINC/IRON TRANSPORTER"	KOG1558	Fe2+/Zn2+_regulated_transporter	NA	NA	NA	NA
Glyma08g17540	273	UniRef100_I1KTX2 Uncharacterized protein n=1 Tax=Glycine max RepID=I1KTX2_SOYBN	0	99.63	UniRef100_Q7XLD2 OSJNBa0070C17.17 protein n=1 Tax=Oryza sativa Japonica Group RepID=Q7XLD2_ORYSJ	2e-72	99.63	AT1G79510.2 | Symbols: | Uncharacterized conserved protein (DUF2358) | chr1:29908271-29909175 REVERSE LENGTH=275	1e-119	99.63	GO:0008150	biological process	GO:0003674	molecular function	GO:0009507	chloroplast	PF10184	Uncharacterized conserved protein (DUF2358)	NA	NA	KOG4457	Uncharacterized_conserved_protein	NA	NA	NA	NA
Glyma08g17555	234	UniRef100_UPI0002338CE4 UPI0002338CE4 related cluster n=1 Tax=unknown RepID=UPI0002338CE4	2e-165	98.72	UniRef100_I1MJD2 Cysteine synthase n=1 Tax=Glycine max RepID=I1MJD2_SOYBN	2e-132	97.01	AT3G04940.1 | Symbols: ATCYSD1, CYSD1 | cysteine synthase D1 | chr3:1365681-1367508 FORWARD LENGTH=324	1e-99	96.15	GO:0000096 GO:0006535 GO:0008152 GO:0008652 GO:0009069 GO:0019344 GO:0042545	sulfur amino acid metabolic process; "cysteine biosynthetic process from serine"; "metabolic process"; "cellular amino acid biosynthetic process"; "serine family amino acid metabolic process"; "cysteine biosynthetic process"; "cell wall modification"	GO:0003824 GO:0004124 GO:0030170	catalytic activity; "cysteine synthase activity"; "pyridoxal phosphate binding"	NA	NA	PF00291	Pyridoxal-phosphate dependent enzyme	PTHR10314 PTHR10314:SF8	PYRIDOXAL-5-PHOSPHATE DEPENDENT BETA FAMILY; "THREONINE DEHYDRATASE"	NA	NA	NA	NA	NA	NA
Glyma08g17570	397	UniRef100_I1KTX5 Uncharacterized protein n=1 Tax=Glycine max RepID=I1KTX5_SOYBN	0	99.75	UniRef100_Q84ND5 Cation diffusion facilitator 9 n=1 Tax=Stylosanthes hamata RepID=Q84ND5_STYHA	0	99.75	AT1G16310.1 | Symbols: | Cation efflux family protein | chr1:5578435-5580585 FORWARD LENGTH=428	0	93.2	GO:0006812 GO:0009718 GO:0009744 GO:0010224 GO:0055085	cation transport; "anthocyanin-containing compound biosynthetic process"; "response to sucrose stimulus"; "response to UV-B"; "transmembrane transport"	GO:0008324	cation transmembrane transporter activity	GO:0016020 GO:0016021	membrane; "integral to membrane"	PF01545	Cation efflux family	PTHR11562 PTHR11562:SF10	CATION EFFLUX PROTEIN/ ZINC TRANSPORTER; "ZINC TRANSPORTER SLC30A1-RELATED"	KOG1485	Mitochondrial_Fe2+_transporter_MMT1_and_related_transporters_(cation_diffusion_facilitator_superfamily)	NA	NA	NA	NA
Glyma08g17580	260	UniRef100_I1KTX6 Uncharacterized protein n=1 Tax=Glycine max RepID=I1KTX6_SOYBN	0	99.62	UniRef100_B9RYL4 Defective in cullin neddylation protein, putative n=1 Tax=Ricinus communis RepID=B9RYL4_RICCO	9e-167	95.77	AT3G12760.1 | Symbols: | CONTAINS InterPro DOMAIN/s: Defective-in-cullin neddylation protein (InterPro:IPR014764), Protein of unknown function DUF298 (InterPro:IPR005176), UBA-like (InterPro:IPR009060); BEST Arabidopsis thaliana protein match is: Domain of unknown function (DUF298) (TAIR:AT1G15860.2); Has 857 Blast hits to 855 proteins in 202 species: Archae - 0; Bacteria - 0; Metazoa - 482; Fung…	2e-142	95.38	GO:0008150	biological process	GO:0003674	molecular function	GO:0005634	nucleus	PF03556	Domain of unknown function (DUF298)	PTHR12281	RP42 RELATED	KOG3077	Uncharacterized_conserved_protein	NA	NA	NA	NA
Glyma08g17585	96	UniRef100_C9E1C1 Defensin n=1 Tax=Triticum aestivum RepID=C9E1C1_WHEAT	4e-06	76.04	UniRef100_C9E1C1 Defensin n=1 Tax=Triticum aestivum RepID=C9E1C1_WHEAT	4e-06	76.04	NA	NA	NA	NA	NA	NA	NA	NA	NA	PF00304	Gamma-thionin family	NA	NA	NA	NA	NA	NA	NA	NA
Glyma08g17591	456	UniRef100_B9RHW0 Putative uncharacterized protein n=1 Tax=Ricinus communis RepID=B9RHW0_RICCO	0	92.76	UniRef100_Q9SA28 F3O9.9 protein n=1 Tax=Arabidopsis thaliana RepID=Q9SA28_ARATH	1e-176	91.01	AT1G16290.1 | Symbols: | FUNCTIONS IN: molecular_function unknown; INVOLVED IN: biological_process unknown; LOCATED IN: chloroplast, vacuole; EXPRESSED IN: 19 plant structures; EXPRESSED DURING: 11 growth stages; CONTAINS InterPro DOMAIN/s: Lytic transglycosylase-like, catalytic (InterPro:IPR008258); Has 171 Blast hits to 155 proteins in 40 species: Archae - 0; Bacteria - 54; Metazoa - 0; Fungi -…	0	92.76	GO:0008150	biological process	GO:0003674	molecular function	GO:0005634 GO:0005773 GO:0009507	nucleus; "vacuole"; "chloroplast"	PF01464	Transglycosylase SLT domain	NA	NA	NA	NA	NA	NA	NA	NA
Glyma08g17595	161	NA	NA	NA	NA	NA	NA	NA	NA	NA	NA	NA	NA	NA	NA	NA	NA	NA	NA	NA	NA	NA	NA	NA	NA	NA
Glyma08g17600	402	UniRef100_UPI0001B83778 UPI0001B83778 related cluster n=1 Tax=unknown RepID=UPI0001B83778	0	99.75	UniRef100_I1MJC7 Phosphoglycerate kinase n=1 Tax=Glycine max RepID=I1MJC7_SOYBN	0	99.75	AT1G79550.2 | Symbols: PGK | phosphoglycerate kinase | chr1:29924347-29926295 REVERSE LENGTH=401	0	99.75	GO:0006096 GO:0034976 GO:0046685 GO:0046686	glycolysis; "response to endoplasmic reticulum stress"; "response to arsenic-containing substance"; "response to cadmium ion"	GO:0004618	phosphoglycerate kinase activity	GO:0005634 GO:0005737 GO:0005774 GO:0005829 GO:0005886 GO:0009506 GO:0009570 GO:0016020 GO:0048046	nucleus; "cytoplasm"; "vacuolar membrane"; "cytosol"; "plasma membrane"; "plasmodesma"; "chloroplast stroma"; "membrane"; "apoplast"	PF00162	Phosphoglycerate kinase	PTHR11406	PHOSPHOGLYCERATE KINASE	KOG1367	3-phosphoglycerate_kinase	2.7.2.3	Phosphoglycerate_kinase	K00927	phosphoglycerate_kinase_[EC:2.7.2.3]
Glyma08g17610	486	UniRef100_I1KTX8 Phosphoglycerate kinase n=1 Tax=Glycine max RepID=I1KTX8_SOYBN	0	99.79	UniRef100_I1KTX8 Phosphoglycerate kinase n=1 Tax=Glycine max RepID=I1KTX8_SOYBN	0	99.79	AT1G56190.1 | Symbols: | Phosphoglycerate kinase family protein | chr1:21028403-21030454 FORWARD LENGTH=478	0	90.53	GO:0000023 GO:0006096 GO:0019252 GO:0019344 GO:0030003 GO:0046686 GO:0070838	maltose metabolic process; "glycolysis"; "starch biosynthetic process"; "cysteine biosynthetic process"; "cellular cation homeostasis"; "response to cadmium ion"; "divalent metal ion transport"	GO:0004618	phosphoglycerate kinase activity	GO:0005737 GO:0005739 GO:0009507 GO:0009570 GO:0009579 GO:0016020	cytoplasm; "mitochondrion"; "chloroplast"; "chloroplast stroma"; "thylakoid"; "membrane"	PF00162	Phosphoglycerate kinase	PTHR11406	PHOSPHOGLYCERATE KINASE	KOG1367	3-phosphoglycerate_kinase	2.7.2.3	Phosphoglycerate_kinase	K00927	phosphoglycerate_kinase_[EC:2.7.2.3]
Glyma08g17615	149	NA	NA	NA	NA	NA	NA	NA	NA	NA	NA	NA	NA	NA	NA	NA	NA	NA	NA	NA	NA	NA	NA	NA	NA	NA
Glyma08g17620	587	UniRef100_I1KTX9 Uncharacterized protein n=1 Tax=Glycine max RepID=I1KTX9_SOYBN	0	99.83	UniRef100_G7IQY0 DEAD-box ATP-dependent RNA helicase n=1 Tax=Medicago truncatula RepID=G7IQY0_MEDTR	0	88.25	AT1G16280.1 | Symbols: RH36, AtRH36, SWA3 | RNA helicase 36 | chr1:5568482-5570487 REVERSE LENGTH=491	0	73.42	GO:0006364 GO:0006606 GO:0009553 GO:0009561 GO:0009791	rRNA processing; "protein import into nucleus"; "embryo sac development"; "megagametogenesis"; "post-embryonic development"	GO:0003676 GO:0004386 GO:0005515 GO:0005524 GO:0008026	nucleic acid binding; "helicase activity"; "protein binding"; "ATP binding"; "ATP-dependent helicase activity"	GO:0005634 GO:0090406	nucleus; "pollen tube"	PF00271 PF00270	Helicase conserved C-terminal domain; "DEAD/DEAH box helicase"	PTHR24031 PTHR24031:SF12	FAMILY NOT NAMED; "SUBFAMILY NOT NAMED"	KOG0340	ATP-dependent_RNA_helicase	NA	NA	NA	NA
Glyma08g17630	272	UniRef100_I1KTY0 Uncharacterized protein n=1 Tax=Glycine max RepID=I1KTY0_SOYBN	0	99.63	UniRef100_I3TAY1 Nuclear transcription factor Y subunit C4 n=1 Tax=Medicago truncatula RepID=I3TAY1_MEDTR	5e-128	93.38	AT1G08970.2 | Symbols: HAP5C, NF-YC9 | nuclear factor Y, subunit C9 | chr1:2883144-2883839 FORWARD LENGTH=231	5e-72	53.68	GO:0006355	regulation of transcription, DNA-dependent	GO:0003677 GO:0003700 GO:0043565	DNA binding; "sequence-specific DNA binding transcription factor activity"; "sequence-specific DNA binding"	GO:0005622 GO:0005634 GO:0005737 GO:0005829	intracellular; "nucleus"; "cytoplasm"; "cytosol"	PF00808	Histone-like transcription factor (CBF/NF-Y) and archaeal histone	PTHR10252 PTHR10252:SF6	HISTONE-LIKE TRANSCRIPTION FACTOR CCAAT-RELATED; "CCAAT-BINDING TRANSCRIPTION FACTOR"	KOG1657	CCAAT-binding_factor,_subunit_C_(HAP5)	NA	NA	NA	NA
Glyma08g17640	1246	UniRef100_UPI0002338CE9 UPI0002338CE9 related cluster n=1 Tax=unknown RepID=UPI0002338CE9	0	99.92	UniRef100_B9RHZ4 Serine/threonine protein kinase, putative n=1 Tax=Ricinus communis RepID=B9RHZ4_RICCO	0	99.6	AT1G79570.1 | Symbols: | Protein kinase superfamily protein with octicosapeptide/Phox/Bem1p domain | chr1:29932856-29937540 REVERSE LENGTH=1248	0	72.71	GO:0006468	protein phosphorylation	GO:0004672 GO:0004712 GO:0005524 GO:0016772	protein kinase activity; "protein serine/threonine/tyrosine kinase activity"; "ATP binding"; "transferase activity, transferring phosphorus-containing groups"	GO:0005634 GO:0005829	nucleus; "cytosol"	PF07714 PF00564	Protein tyrosine kinase; "PB1 domain"	PTHR23257 PTHR23257:SF68	SERINE-THREONINE PROTEIN KINASE; "SERINE/THREONINE PROTEIN KINASE"	KOG0192	Tyrosine_kinase_specific_for_activated_(GTP-bound)_p21cdc42Hs	NA	NA	NA	NA
Glyma08g17650	1254	UniRef100_UPI0002338CEA UPI0002338CEA related cluster n=1 Tax=unknown RepID=UPI0002338CEA	0	99.92	UniRef100_B9RHZ4 Serine/threonine protein kinase, putative n=1 Tax=Ricinus communis RepID=B9RHZ4_RICCO	0	99.44	AT1G79570.1 | Symbols: | Protein kinase superfamily protein with octicosapeptide/Phox/Bem1p domain | chr1:29932856-29937540 REVERSE LENGTH=1248	0	38.04	GO:0006468	protein phosphorylation	GO:0004672 GO:0004712 GO:0005524 GO:0016772	protein kinase activity; "protein serine/threonine/tyrosine kinase activity"; "ATP binding"; "transferase activity, transferring phosphorus-containing groups"	GO:0005634 GO:0005829	nucleus; "cytosol"	PF00564 PF07714	PB1 domain; "Protein tyrosine kinase"	PTHR23257 PTHR23257:SF68	SERINE-THREONINE PROTEIN KINASE; "SERINE/THREONINE PROTEIN KINASE"	KOG0192	Tyrosine_kinase_specific_for_activated_(GTP-bound)_p21cdc42Hs	NA	NA	NA	NA
Glyma08g17660	441	UniRef100_I1KTY3 Uncharacterized protein n=1 Tax=Glycine max RepID=I1KTY3_SOYBN	0	99.77	UniRef100_G1FTR5 Nodulin 41 n=1 Tax=Phaseolus vulgaris RepID=G1FTR5_PHAVU	6e-143	98.41	AT2G35615.1 | Symbols: | Eukaryotic aspartyl protease family protein | chr2:14959391-14960734 FORWARD LENGTH=447	2e-100	98.87	GO:0006508	proteolysis	GO:0004190	aspartic-type endopeptidase activity	GO:0005576	extracellular region	PF00026	Eukaryotic aspartyl protease	PTHR13683 PTHR13683:SF98	ASPARTYL PROTEASES; "CHLOROPLAST NUCLEIOD DNA-BINDING-RELATED"	KOG1339	Aspartyl_protease	NA	NA	NA	NA
Glyma08g17670	439	UniRef100_I1KTY4 Uncharacterized protein n=1 Tax=Glycine max RepID=I1KTY4_SOYBN	0	99.77	UniRef100_G1FTR5 Nodulin 41 n=1 Tax=Phaseolus vulgaris RepID=G1FTR5_PHAVU	4e-124	99.54	AT5G33340.1 | Symbols: CDR1 | Eukaryotic aspartyl protease family protein | chr5:12594474-12595787 FORWARD LENGTH=437	2e-91	93.39	GO:0006508 GO:0010310 GO:0010337 GO:0042742	proteolysis; "regulation of hydrogen peroxide metabolic process"; "regulation of salicylic acid metabolic process"; "defense response to bacterium"	GO:0004190	aspartic-type endopeptidase activity	GO:0005576 GO:0048046	extracellular region; "apoplast"	PF00026	Eukaryotic aspartyl protease	PTHR13683 PTHR13683:SF98	ASPARTYL PROTEASES; "CHLOROPLAST NUCLEIOD DNA-BINDING-RELATED"	KOG1339	Aspartyl_protease	NA	NA	NA	NA
Glyma08g17680	437	UniRef100_I1KTY5 Uncharacterized protein n=2 Tax=Glycine max RepID=I1KTY5_SOYBN	0	99.77	UniRef100_G1FTR5 Nodulin 41 n=1 Tax=Phaseolus vulgaris RepID=G1FTR5_PHAVU	5e-169	99.54	AT5G33340.1 | Symbols: CDR1 | Eukaryotic aspartyl protease family protein | chr5:12594474-12595787 FORWARD LENGTH=437	2e-90	93.36	GO:0006508 GO:0010310 GO:0010337 GO:0042742	proteolysis; "regulation of hydrogen peroxide metabolic process"; "regulation of salicylic acid metabolic process"; "defense response to bacterium"	GO:0004190	aspartic-type endopeptidase activity	GO:0005576 GO:0048046	extracellular region; "apoplast"	PF00026	Eukaryotic aspartyl protease	PTHR13683 PTHR13683:SF98	ASPARTYL PROTEASES; "CHLOROPLAST NUCLEIOD DNA-BINDING-RELATED"	KOG1339	Aspartyl_protease	NA	NA	NA	NA
Glyma08g17687	87	NA	NA	NA	NA	NA	NA	NA	NA	NA	NA	NA	NA	NA	NA	NA	NA	NA	NA	NA	NA	NA	NA	NA	NA	NA
Glyma08g17694	93	NA	NA	NA	NA	NA	NA	NA	NA	NA	NA	NA	NA	NA	NA	NA	NA	NA	NA	NA	NA	NA	NA	NA	NA	NA
Glyma08g17702	102	UniRef100_C6T5F3 Putative uncharacterized protein n=1 Tax=Glycine max RepID=C6T5F3_SOYBN	9e-63	99.02	UniRef100_G1FTR5 Nodulin 41 n=1 Tax=Phaseolus vulgaris RepID=G1FTR5_PHAVU	8e-35	98.04	AT1G64830.1 | Symbols: | Eukaryotic aspartyl protease family protein | chr1:24091271-24092566 REVERSE LENGTH=431	6e-13	71.57	GO:0006508	proteolysis	GO:0004190	aspartic-type endopeptidase activity	GO:0005576	extracellular region	NA	NA	NA	NA	NA	NA	NA	NA	NA	NA
Glyma08g17710	346	UniRef100_I1KTY6 Uncharacterized protein (Fragment) n=1 Tax=Glycine max RepID=I1KTY6_SOYBN	0	99.13	UniRef100_G1FTR5 Nodulin 41 n=1 Tax=Phaseolus vulgaris RepID=G1FTR5_PHAVU	4e-150	99.42	AT2G35615.1 | Symbols: | Eukaryotic aspartyl protease family protein | chr2:14959391-14960734 FORWARD LENGTH=447	2e-72	99.13	GO:0006508	proteolysis	GO:0004190	aspartic-type endopeptidase activity	GO:0005576	extracellular region	PF00026	Eukaryotic aspartyl protease	PTHR13683 PTHR13683:SF98	ASPARTYL PROTEASES; "CHLOROPLAST NUCLEIOD DNA-BINDING-RELATED"	KOG1339	Aspartyl_protease	NA	NA	NA	NA
Glyma08g17722	163	UniRef100_I1MJB8 Uncharacterized protein n=1 Tax=Glycine max RepID=I1MJB8_SOYBN	7e-92	96.32	UniRef100_B9RHZ5 S-adenosylmethionine-dependent methyltransferase, putative n=1 Tax=Ricinus communis RepID=B9RHZ5_RICCO	5e-60	96.32	AT1G16445.1 | Symbols: | S-adenosyl-L-methionine-dependent methyltransferases superfamily protein | chr1:5617811-5619303 FORWARD LENGTH=274	2e-56	95.09	GO:0008150	biological process	NA	NA	GO:0009507	chloroplast	PF06962	Putative rRNA methylase	NA	NA	NA	NA	NA	NA	NA	NA
Glyma08g17734	312	UniRef100_I1MJB5 Uncharacterized protein n=1 Tax=Glycine max RepID=I1MJB5_SOYBN	2e-108	72.44	UniRef100_G8A0A1 LAX n=1 Tax=Medicago truncatula RepID=G8A0A1_MEDTR	6e-61	97.12	AT1G30670.1 | Symbols: | basic helix-loop-helix (bHLH) DNA-binding superfamily protein | chr1:10879311-10880188 REVERSE LENGTH=264	5e-28	74.68	GO:0006355	regulation of transcription, DNA-dependent	GO:0003677 GO:0003700	DNA binding; "sequence-specific DNA binding transcription factor activity"	GO:0005634	nucleus	PF00010	Helix-loop-helix DNA-binding domain	NA	NA	NA	NA	NA	NA	NA	NA
Glyma08g17747	305	UniRef100_I1MJB5 Uncharacterized protein n=1 Tax=Glycine max RepID=I1MJB5_SOYBN	8e-109	72.46	UniRef100_G8A0A1 LAX n=1 Tax=Medicago truncatula RepID=G8A0A1_MEDTR	9e-69	99.34	AT1G30670.1 | Symbols: | basic helix-loop-helix (bHLH) DNA-binding superfamily protein | chr1:10879311-10880188 REVERSE LENGTH=264	4e-29	57.05	GO:0006355	regulation of transcription, DNA-dependent	GO:0003677 GO:0003700	DNA binding; "sequence-specific DNA binding transcription factor activity"	GO:0005634	nucleus	NA	NA	NA	NA	NA	NA	NA	NA	NA	NA
Glyma08g17760	380	UniRef100_I1KTY9 Sulfurtransferase n=1 Tax=Glycine max RepID=I1KTY9_SOYBN	0	99.74	UniRef100_I1KTY9 Sulfurtransferase n=1 Tax=Glycine max RepID=I1KTY9_SOYBN	0	99.74	AT1G79230.1 | Symbols: ST1, ATMST1, MST1, ATRDH1, STR1 | mercaptopyruvate sulfurtransferase 1 | chr1:29800824-29803679 FORWARD LENGTH=379	0	99.47	GO:0000394 GO:0007568 GO:0009086 GO:0009793 GO:0019761	RNA splicing, via endonucleolytic cleavage and ligation; "aging"; "methionine biosynthetic process"; "embryo development ending in seed dormancy"; "glucosinolate biosynthetic process"	GO:0004792 GO:0016783 GO:0016784	thiosulfate sulfurtransferase activity; "sulfurtransferase activity"; "3-mercaptopyruvate sulfurtransferase activity"	GO:0005739 GO:0009507	mitochondrion; "chloroplast"	PF00581	Rhodanese-like domain	PTHR11364	THIOSULFATE SULFERTANSFERASE	KOG1529	Mercaptopyruvate_sulfurtransferase/thiosulfate_sulfurtransferase	2.8.1.2 2.8.1.1	3-mercaptopyruvate_sulfurtransferase. Thiosulfate_sulfurtransferase	K01011	thiosulfate/3-mercaptopyruvate_sulfurtransferase_[EC:2.8.1.1_2.8.1.2]
Glyma08g17776	362	UniRef100_UPI00023383EE UPI00023383EE related cluster n=1 Tax=unknown RepID=UPI00023383EE	0	99.72	UniRef100_G8A1A7 Protein hemK n=1 Tax=Medicago truncatula RepID=G8A1A7_MEDTR	0	99.72	AT5G64150.1 | Symbols: | RNA methyltransferase family protein | chr5:25668997-25670731 REVERSE LENGTH=377	1e-148	95.58	GO:0006479 GO:0006783 GO:0032259	protein methylation; "heme biosynthetic process"; "methylation"	GO:0003676 GO:0003824 GO:0008168 GO:0008276	nucleic acid binding; "catalytic activity"; "methyltransferase activity"; "protein methyltransferase activity"	GO:0009507	chloroplast	PF05175	Methyltransferase small domain	PTHR18895 PTHR18895:SF7	METHYLTRANSFERASE; "gb def: hypothetical protein [ureaplasma urealyticum]"	KOG2904	Predicted_methyltransferase	NA	NA	NA	NA
Glyma08g17793	179	UniRef100_I1KTZ1 Uncharacterized protein (Fragment) n=1 Tax=Glycine max RepID=I1KTZ1_SOYBN	3e-123	99.44	UniRef100_G7ZX63 Cysteine-rich receptor-like protein kinase (Fragment) n=1 Tax=Medicago truncatula RepID=G7ZX63_MEDTR	8e-67	86.59	AT4G23180.1 | Symbols: CRK10, RLK4 | cysteine-rich RLK (RECEPTOR-like protein kinase) 10 | chr4:12138171-12140780 FORWARD LENGTH=669	3e-56	99.44	GO:0006468 GO:0006995	protein phosphorylation; "cellular response to nitrogen starvation"	GO:0004672 GO:0004674 GO:0004713 GO:0005524 GO:0016301 GO:0016772	protein kinase activity; "protein serine/threonine kinase activity"; "protein tyrosine kinase activity"; "ATP binding"; "kinase activity"; "transferase activity, transferring phosphorus-containing groups"	GO:0005886	plasma membrane	PF07714	Protein tyrosine kinase	PTHR24420 PTHR24420:SF430	FAMILY NOT NAMED; "SUBFAMILY NOT NAMED"	NA	NA	NA	NA	NA	NA
Glyma08g17810	236	UniRef100_C6TH59 Proteasome subunit alpha type n=2 Tax=Glycine max RepID=C6TH59_SOYBN	3e-170	99.58	UniRef100_C6TH59 Proteasome subunit alpha type n=2 Tax=Glycine max RepID=C6TH59_SOYBN	3e-170	99.58	AT1G16470.2 | Symbols: PAB1 | proteasome subunit PAB1 | chr1:5623122-5625439 FORWARD LENGTH=235	1e-162	99.58	GO:0006511 GO:0010043 GO:0051603	ubiquitin-dependent protein catabolic process; "response to zinc ion"; "proteolysis involved in cellular protein catabolic process"	GO:0004175 GO:0004298 GO:0008233	endopeptidase activity; "threonine-type endopeptidase activity"; "peptidase activity"	GO:0000502 GO:0005829 GO:0005839 GO:0009507 GO:0019773 GO:0022626	proteasome complex; "cytosol"; "proteasome core complex"; "chloroplast"; "proteasome core complex, alpha-subunit complex"; "cytosolic ribosome"	PF10584 PF00227	Proteasome subunit A N-terminal signature; "Proteasome subunit"	PTHR11599 PTHR11599:SF16	PROTEASOME SUBUNIT ALPHA/BETA; "PROTEASOME BETA/DELTA SUBUNIT"	KOG0181	20S_proteasome,_regulatory_subunit_alpha_type_PSMA2/PRE8	3.4.25.1	Proteasome_endopeptidase_complex.	K02726	20S_proteasome_subunit_alpha_2_[EC:3.4.25.1]
Glyma08g17820	409	UniRef100_UPI0002338E3C UPI0002338E3C related cluster n=1 Tax=unknown RepID=UPI0002338E3C	0	99.76	UniRef100_I1KTZ8 Lipase n=1 Tax=Glycine max RepID=I1KTZ8_SOYBN	0	99.76	AT5G14180.1 | Symbols: MPL1 | Myzus persicae-induced lipase 1 | chr5:4571442-4574413 REVERSE LENGTH=418	9e-138	88.51	GO:0002213 GO:0006629 GO:0006635 GO:0009062	defense response to insect; "lipid metabolic process"; "fatty acid beta-oxidation"; "fatty acid catabolic process"	GO:0003824 GO:0016298	catalytic activity; "lipase activity"	GO:0005576	extracellular region	PF04083	ab-hydrolase associated lipase region	PTHR11005	LYSOSOMAL ACID LIPASE-RELATED	KOG2624	Triglyceride_lipase-cholesterol_esterase	NA	NA	NA	NA
Glyma08g17830	152	UniRef100_I1KTZ9 Uncharacterized protein n=1 Tax=Glycine max RepID=I1KTZ9_SOYBN	1e-102	99.34	UniRef100_F8QMT0 Stigma/style cell cycle inhibitor n=2 Tax=Nicotiana tabacum RepID=F8QMT0_TOBAC	2e-40	99.34	AT1G79200.1 | Symbols: | unknown protein; Has 30201 Blast hits to 17322 proteins in 780 species: Archae - 12; Bacteria - 1396; Metazoa - 17338; Fungi - 3422; Plants - 5037; Viruses - 0; Other Eukaryotes - 2996 (source: NCBI BLink). | chr1:29794404-29795711 FORWARD LENGTH=159	3e-32	48.68	GO:0008150	biological process	GO:0003674	molecular function	GO:0005634	nucleus	NA	NA	NA	NA	NA	NA	NA	NA	NA	NA
Glyma08g17840	339	UniRef100_I1KU00 Uncharacterized protein n=1 Tax=Glycine max RepID=I1KU00_SOYBN	0	99.71	UniRef100_Q8S8E4 AT2G36000 protein n=1 Tax=Arabidopsis thaliana RepID=Q8S8E4_ARATH	2e-89	69.62	AT2G36000.1 | Symbols: | Mitochondrial transcription termination factor family protein | chr2:15117181-15118182 FORWARD LENGTH=333	1e-98	75.22	GO:0008150	biological process	GO:0003674	molecular function	GO:0005739 GO:0009507	mitochondrion; "chloroplast"	PF02536	mTERF	PTHR13068 PTHR13068:SF3	CGI-12 PROTEIN-RELATED; "SUBFAMILY NOT NAMED"	NA	NA	NA	NA	NA	NA
Glyma08g17850	400	UniRef100_UPI0002338E3E UPI0002338E3E related cluster n=1 Tax=unknown RepID=UPI0002338E3E	0	99.75	UniRef100_B9RI07 Peroxidase 57, putative n=1 Tax=Ricinus communis RepID=B9RI07_RICCO	8e-162	97.75	AT4G33870.1 | Symbols: | Peroxidase superfamily protein | chr4:16234670-16236492 REVERSE LENGTH=401	2e-87	82.25	GO:0006979 GO:0055114	response to oxidative stress; "oxidation-reduction process"	GO:0004601 GO:0020037	peroxidase activity; "heme binding"	GO:0005576	extracellular region	PF00141	Peroxidase	NA	NA	NA	NA	NA	NA	NA	NA
Glyma08g17861	387	UniRef100_I1KU02 Uncharacterized protein n=1 Tax=Glycine max RepID=I1KU02_SOYBN	2e-167	82.95	UniRef100_I3RSY1 R2R3MYB transcription factor (Fragment) n=1 Tax=Lotus japonicus RepID=I3RSY1_LOTJA	7e-101	82.43	AT1G79180.1 | Symbols: ATMYB63, MYB63 | myb domain protein 63 | chr1:29786509-29787589 FORWARD LENGTH=294	4e-83	82.69	GO:0006355 GO:0009751 GO:0009753 GO:0010413 GO:0045492 GO:0045893 GO:2000652	regulation of transcription, DNA-dependent; "response to salicylic acid stimulus"; "response to jasmonic acid stimulus"; "glucuronoxylan metabolic process"; "xylan biosynthetic process"; "positive regulation of transcription, DNA-dependent"; "regulation of secondary cell wall biogenesis"	GO:0003677 GO:0003700	DNA binding; "sequence-specific DNA binding transcription factor activity"	GO:0005634	nucleus	PF00249	Myb-like DNA-binding domain	PTHR10641	MYB-RELATED	KOG0048	Transcription_factor,_Myb_superfamily	NA	NA	K09422	myb_proto-oncogene_protein,_plant
Glyma08g17870	155	UniRef100_C6SXX2 Uncharacterized protein n=1 Tax=Glycine max RepID=C6SXX2_SOYBN	2e-104	99.35	UniRef100_G7K8J5 Bi-ubiquitin n=1 Tax=Medicago truncatula RepID=G7K8J5_MEDTR	1e-102	98.71	AT1G31340.1 | Symbols: RUB1, NEDD8, ATRUB1 | related to ubiquitin 1 | chr1:11218076-11219417 REVERSE LENGTH=156	2e-104	98.06	GO:0006464 GO:0009693 GO:0009733 GO:0009790 GO:0045116	cellular protein modification process; "ethylene biosynthetic process"; "response to auxin stimulus"; "embryo development"; "protein neddylation"	NA	NA	GO:0005829 GO:0005886	cytosol; "plasma membrane"	PF00240	Ubiquitin family	PTHR10666	UBIQUITIN	KOG0005	Ubiquitin-like_protein	NA	NA	NA	NA
Glyma08g17880	139	UniRef100_I1KU04 Uncharacterized protein n=1 Tax=Glycine max RepID=I1KU04_SOYBN	2e-94	99.28	UniRef100_D7L0K8 Auxin-responsive family protein n=1 Tax=Arabidopsis lyrata subsp. lyrata RepID=D7L0K8_ARALL	2e-50	94.24	AT3G12830.1 | Symbols: | SAUR-like auxin-responsive protein family | chr3:4079117-4079515 REVERSE LENGTH=132	7e-53	94.24	GO:0009733	response to auxin stimulus	GO:0003674	molecular function	NA	NA	PF02519	Auxin responsive protein	NA	NA	NA	NA	NA	NA	K14488	SAUR_family_protein
Glyma08g17890	113	UniRef100_C6T619 Uncharacterized protein n=1 Tax=Glycine max RepID=C6T619_SOYBN	2e-77	99.12	UniRef100_Q8LC53 Protein EPIDERMAL PATTERNING FACTOR 2 n=1 Tax=Arabidopsis thaliana RepID=EPF2_ARATH	4e-30	91.15	AT1G34245.1 | Symbols: EPF2 | Putative membrane lipoprotein | chr1:12472990-12473631 FORWARD LENGTH=120	1e-32	91.15	GO:0010052 GO:0010374 GO:0048730 GO:2000122	guard cell differentiation; "stomatal complex development"; "epidermis morphogenesis"; "negative regulation of stomatal complex development"	GO:0003674	molecular function	GO:0005576	extracellular region	NA	NA	NA	NA	NA	NA	NA	NA	NA	NA
Glyma08g17905	533	UniRef100_UPI000233B96B UPI000233B96B related cluster n=1 Tax=unknown RepID=UPI000233B96B	8e-116	58.16	UniRef100_G7IJB8 F-box family protein n=1 Tax=Medicago truncatula RepID=G7IJB8_MEDTR	2e-67	59.66	AT1G80960.1 | Symbols: | F-box and Leucine Rich Repeat domains containing protein | chr1:30416065-30418220 FORWARD LENGTH=486	5e-22	86.87	GO:0008150	biological process	GO:0003674	molecular function	GO:0005634	nucleus	PF08387	FBD	NA	NA	NA	NA	NA	NA	NA	NA
Glyma08g17920	126	UniRef100_C6TCH0 Uncharacterized protein n=1 Tax=Glycine max RepID=C6TCH0_SOYBN	5e-86	99.21	UniRef100_G7JDY3 Cysteine proteinase inhibitor n=1 Tax=Medicago truncatula RepID=G7JDY3_MEDTR	7e-21	92.06	AT5G47550.1 | Symbols: | Cystatin/monellin superfamily protein | chr5:19286596-19286964 REVERSE LENGTH=122	2e-18	80.16	NA	NA	GO:0004869	cysteine-type endopeptidase inhibitor activity	GO:0005576 GO:0005618	extracellular region; "cell wall"	PF00031	Cystatin domain	NA	NA	NA	NA	NA	NA	NA	NA
Glyma08g17935	138	UniRef100_B9HGU5 Predicted protein n=1 Tax=Populus trichocarpa RepID=B9HGU5_POPTR	2e-15	97.83	UniRef100_F4I3J7 Plant invertase/pectin methylesterase inhibitor domain-containing protein n=1 Tax=Arabidopsis thaliana RepID=F4I3J7_ARATH	5e-07	97.1	AT1G56100.2 | Symbols: | Plant invertase/pectin methylesterase inhibitor superfamily protein | chr1:20983374-20983979 REVERSE LENGTH=170	1e-09	97.1	NA	NA	NA	NA	NA	NA	NA	NA	NA	NA	NA	NA	NA	NA	NA	NA
Glyma08g17950	282	UniRef100_I1KU07 Uncharacterized protein n=1 Tax=Glycine max RepID=I1KU07_SOYBN	0	99.65	UniRef100_B9RI19 Heat shock protein 70 (HSP70)-interacting protein, putative n=1 Tax=Ricinus communis RepID=B9RI19_RICCO	3e-102	99.65	AT1G56090.1 | Symbols: | Tetratricopeptide repeat (TPR)-like superfamily protein | chr1:20977989-20979185 REVERSE LENGTH=272	1e-89	99.65	GO:0008150	biological process	NA	NA	GO:0005737	cytoplasm	PF00515	Tetratricopeptide repeat	PTHR22904 PTHR22904:SF22	CHAPERONE BINDING PROTEIN; "GB DEF: HYPOTHETICAL PROTEIN"	NA	NA	NA	NA	NA	NA
Glyma08g17960	612	UniRef100_UPI00023383F1 UPI00023383F1 related cluster n=1 Tax=unknown RepID=UPI00023383F1	0	99.84	UniRef100_B9RI21 Cyclin-L2, putative n=1 Tax=Ricinus communis RepID=B9RI21_RICCO	0	99.84	AT5G45190.1 | Symbols: | Cyclin family protein | chr5:18277808-18280733 REVERSE LENGTH=579	0	99.67	GO:0000079 GO:0000394 GO:0006355 GO:0006366 GO:0006486 GO:0008284 GO:0009615 GO:0009630 GO:0009908 GO:0010090 GO:0048366 GO:0050792 GO:0051726	regulation of cyclin-dependent protein kinase activity; "RNA splicing, via endonucleolytic cleavage and ligation"; "regulation of transcription, DNA-dependent"; "transcription from RNA polymerase II promoter"; "protein glycosylation"; "positive regulation of cell proliferation"; "response to virus"; "gravitropism"; "flower development"; "trichome morphogenesis"; "leaf development"; "regulation of…	GO:0004693 GO:0019901	cyclin-dependent protein kinase activity; "protein kinase binding"	GO:0005634	nucleus	PF00134	Cyclin, N-terminal domain	PTHR10026 PTHR10026:SF10	CYCLIN; "CYCLIN-RLEATED"	KOG0834	CDK9_kinase-activating_protein_cyclin_T	NA	NA	NA	NA
Glyma08g17980	285	UniRef100_I1MJ96 Uncharacterized protein n=1 Tax=Glycine max RepID=I1MJ96_SOYBN	1e-164	90.18	UniRef100_G7ITD4 CCT n=1 Tax=Medicago truncatula RepID=G7ITD4_MEDTR	2e-112	96.84	AT3G12890.1 | Symbols: ASML2 | activator of spomin::LUC2 | chr3:4099223-4100277 FORWARD LENGTH=251	1e-44	63.16	GO:0010182 GO:0045893	sugar mediated signaling pathway; "positive regulation of transcription, DNA-dependent"	NA	NA	GO:0005739	mitochondrion	PF06203	CCT motif	NA	NA	NA	NA	NA	NA	NA	NA
Glyma08g17990	178	UniRef100_I1KU11 Uncharacterized protein n=1 Tax=Glycine max RepID=I1KU11_SOYBN	4e-128	99.44	UniRef100_B9RI26 LOB domain-containing protein, putative n=1 Tax=Ricinus communis RepID=B9RI26_RICCO	2e-85	98.88	AT1G31320.1 | Symbols: LBD4 | LOB domain-containing protein 4 | chr1:11213107-11214032 FORWARD LENGTH=172	9e-70	98.88	GO:0008150 GO:0009855 GO:0009944 GO:0010014 GO:0010075	biological process; "determination of bilateral symmetry"; "polarity specification of adaxial/abaxial axis"; "meristem initiation"; "regulation of meristem growth"	NA	NA	GO:0005634	nucleus	PF03195	Protein of unknown function DUF260	NA	NA	NA	NA	NA	NA	NA	NA
Glyma08g18000	363	UniRef100_I1KU12 Uncharacterized protein n=1 Tax=Glycine max RepID=I1KU12_SOYBN	0	99.72	UniRef100_G7IGZ5 1-aminocyclopropane-1-carboxylate oxidase n=1 Tax=Medicago truncatula RepID=G7IGZ5_MEDTR	0	99.72	AT3G12900.1 | Symbols: | 2-oxoglutarate (2OG) and Fe(II)-dependent oxygenase superfamily protein | chr3:4104576-4106112 FORWARD LENGTH=357	7e-176	99.17	GO:0055114 GO:0071281 GO:0071369 GO:0071732	oxidation-reduction process; "cellular response to iron ion"; "cellular response to ethylene stimulus"; "cellular response to nitric oxide"	GO:0016491 GO:0016706	oxidoreductase activity; "oxidoreductase activity, acting on paired donors, with incorporation or reduction of molecular oxygen, 2-oxoglutarate as one donor, and incorporation of one atom each of oxygen into both donors"	GO:0005737	cytoplasm	PF03171	2OG-Fe(II) oxygenase superfamily	PTHR10209 PTHR10209:SF55	FE(II)/ ASCORBATE OXIDASE SUPERFAMILY; "OXIDOREDUCTASE, 2OG-FE(II) OXYGENASE FAMILY PROTEI"	KOG0143	Iron/ascorbate_family_oxidoreductases	NA	NA	NA	NA
Glyma08g18011	124	UniRef100_UPI0002338E43 UPI0002338E43 related cluster n=1 Tax=unknown RepID=UPI0002338E43	8e-74	99.19	UniRef100_G7IGZ6 1-aminocyclopropane-1-carboxylate oxidase n=1 Tax=Medicago truncatula RepID=G7IGZ6_MEDTR	1e-47	98.39	AT3G12900.1 | Symbols: | 2-oxoglutarate (2OG) and Fe(II)-dependent oxygenase superfamily protein | chr3:4104576-4106112 FORWARD LENGTH=357	2e-35	99.19	GO:0055114 GO:0071281 GO:0071369 GO:0071732	oxidation-reduction process; "cellular response to iron ion"; "cellular response to ethylene stimulus"; "cellular response to nitric oxide"	GO:0016491 GO:0016706	oxidoreductase activity; "oxidoreductase activity, acting on paired donors, with incorporation or reduction of molecular oxygen, 2-oxoglutarate as one donor, and incorporation of one atom each of oxygen into both donors"	GO:0005737	cytoplasm	NA	NA	PTHR10209	FE(II)/ ASCORBATE OXIDASE SUPERFAMILY	NA	NA	NA	NA	NA	NA
Glyma08g18022	154	UniRef100_I1KU13 Uncharacterized protein n=1 Tax=Glycine max RepID=I1KU13_SOYBN	5e-107	99.35	UniRef100_G7IGZ5 1-aminocyclopropane-1-carboxylate oxidase n=1 Tax=Medicago truncatula RepID=G7IGZ5_MEDTR	5e-77	99.35	AT3G12900.1 | Symbols: | 2-oxoglutarate (2OG) and Fe(II)-dependent oxygenase superfamily protein | chr3:4104576-4106112 FORWARD LENGTH=357	2e-67	96.75	GO:0055114 GO:0071281 GO:0071369 GO:0071732	oxidation-reduction process; "cellular response to iron ion"; "cellular response to ethylene stimulus"; "cellular response to nitric oxide"	GO:0016491 GO:0016706	oxidoreductase activity; "oxidoreductase activity, acting on paired donors, with incorporation or reduction of molecular oxygen, 2-oxoglutarate as one donor, and incorporation of one atom each of oxygen into both donors"	GO:0005737	cytoplasm	PF03171	2OG-Fe(II) oxygenase superfamily	PTHR10209 PTHR10209:SF55	FE(II)/ ASCORBATE OXIDASE SUPERFAMILY; "OXIDOREDUCTASE, 2OG-FE(II) OXYGENASE FAMILY PROTEI"	NA	NA	NA	NA	NA	NA
Glyma08g18033	367	UniRef100_UPI0002338E43 UPI0002338E43 related cluster n=1 Tax=unknown RepID=UPI0002338E43	0	88.28	UniRef100_G7IGZ5 1-aminocyclopropane-1-carboxylate oxidase n=1 Tax=Medicago truncatula RepID=G7IGZ5_MEDTR	6e-179	99.73	AT3G12900.1 | Symbols: | 2-oxoglutarate (2OG) and Fe(II)-dependent oxygenase superfamily protein | chr3:4104576-4106112 FORWARD LENGTH=357	8e-151	98.64	GO:0055114 GO:0071281 GO:0071369 GO:0071732	oxidation-reduction process; "cellular response to iron ion"; "cellular response to ethylene stimulus"; "cellular response to nitric oxide"	GO:0016491 GO:0016706	oxidoreductase activity; "oxidoreductase activity, acting on paired donors, with incorporation or reduction of molecular oxygen, 2-oxoglutarate as one donor, and incorporation of one atom each of oxygen into both donors"	GO:0005737	cytoplasm	PF03171	2OG-Fe(II) oxygenase superfamily	PTHR10209 PTHR10209:SF55	FE(II)/ ASCORBATE OXIDASE SUPERFAMILY; "OXIDOREDUCTASE, 2OG-FE(II) OXYGENASE FAMILY PROTEI"	KOG0143	Iron/ascorbate_family_oxidoreductases	NA	NA	NA	NA
Glyma08g18044	81	UniRef100_I1KU15 Uncharacterized protein n=1 Tax=Glycine max RepID=I1KU15_SOYBN	7e-43	88.89	UniRef100_G7IH02 NAC domain protein n=1 Tax=Medicago truncatula RepID=G7IH02_MEDTR	4e-30	87.65	AT2G43000.1 | Symbols: anac042, NAC042 | NAC domain containing protein 42 | chr2:17880617-17882584 REVERSE LENGTH=275	5e-23	70.37	GO:0005992 GO:0006561 GO:0007275 GO:0009627 GO:0009718 GO:0009723 GO:0010120 GO:0010150 GO:0034976 GO:0042538 GO:1900056	trehalose biosynthetic process; "proline biosynthetic process"; "multicellular organismal development"; "systemic acquired resistance"; "anthocyanin-containing compound biosynthetic process"; "response to ethylene stimulus"; "camalexin biosynthetic process"; "leaf senescence"; "response to endoplasmic reticulum stress"; "hyperosmotic salinity response"; "negative regulation of leaf senescence"	GO:0003677 GO:0003700	DNA binding; "sequence-specific DNA binding transcription factor activity"	GO:0005634	nucleus	PF02365	No apical meristem (NAM) protein	NA	NA	NA	NA	NA	NA	NA	NA
Glyma08g18056	166	UniRef100_I1KU15 Uncharacterized protein n=1 Tax=Glycine max RepID=I1KU15_SOYBN	7e-111	94.58	UniRef100_G7IGZ8 NAC domain-containing protein n=1 Tax=Medicago truncatula RepID=G7IGZ8_MEDTR	3e-47	99.4	AT3G12910.1 | Symbols: | NAC (No Apical Meristem) domain transcriptional regulator superfamily protein | chr3:4109417-4110648 FORWARD LENGTH=303	4e-17	98.19	GO:0006355	regulation of transcription, DNA-dependent	GO:0003677 GO:0003700	DNA binding; "sequence-specific DNA binding transcription factor activity"	GO:0005634	nucleus	NA	NA	NA	NA	NA	NA	NA	NA	NA	NA
Glyma08g18068	331	UniRef100_UPI000233856E UPI000233856E related cluster n=1 Tax=unknown RepID=UPI000233856E	0	99.7	UniRef100_G7IH09 1-aminocyclopropane-1-carboxylate oxidase-like protein n=1 Tax=Medicago truncatula RepID=G7IH09_MEDTR	1e-118	99.7	AT1G06620.1 | Symbols: | 2-oxoglutarate (2OG) and Fe(II)-dependent oxygenase superfamily protein | chr1:2025618-2027094 FORWARD LENGTH=365	2e-79	96.37	GO:0009414 GO:0009611 GO:0009867 GO:0042538 GO:0055114	response to water deprivation; "response to wounding"; "jasmonic acid mediated signaling pathway"; "hyperosmotic salinity response"; "oxidation-reduction process"	GO:0016491 GO:0016706	oxidoreductase activity; "oxidoreductase activity, acting on paired donors, with incorporation or reduction of molecular oxygen, 2-oxoglutarate as one donor, and incorporation of one atom each of oxygen into both donors"	GO:0005737	cytoplasm	PF03171	2OG-Fe(II) oxygenase superfamily	PTHR10209 PTHR10209:SF55	FE(II)/ ASCORBATE OXIDASE SUPERFAMILY; "OXIDOREDUCTASE, 2OG-FE(II) OXYGENASE FAMILY PROTEI"	KOG0143	Iron/ascorbate_family_oxidoreductases	NA	NA	NA	NA
Glyma08g18080	329	UniRef100_I1KU18 Uncharacterized protein n=1 Tax=Glycine max RepID=I1KU18_SOYBN	0	99.7	UniRef100_G7IH11 Nitrile-specifier protein n=1 Tax=Medicago truncatula RepID=G7IH11_MEDTR	0	98.48	AT3G07720.1 | Symbols: | Galactose oxidase/kelch repeat superfamily protein | chr3:2465439-2467033 FORWARD LENGTH=329	9e-166	96.66	GO:0009627 GO:0009697 GO:0010043	systemic acquired resistance; "salicylic acid biosynthetic process"; "response to zinc ion"	GO:0003674	molecular function	GO:0005634 GO:0005737 GO:0005829	nucleus; "cytoplasm"; "cytosol"	PF01344	Kelch motif	PTHR23244 PTHR23244:SF16	KELCH REPEAT DOMAIN; "JASMONATE INDUCIBLE PROTEIN-RELATED"	NA	NA	NA	NA	NA	NA
Glyma08g18090	318	UniRef100_I1KU19 Uncharacterized protein n=1 Tax=Glycine max RepID=I1KU19_SOYBN	3e-176	76.1	UniRef100_G7IH14 1-aminocyclopropane-1-carboxylate oxidase-like protein n=1 Tax=Medicago truncatula RepID=G7IH14_MEDTR	2e-170	98.43	AT1G06620.1 | Symbols: | 2-oxoglutarate (2OG) and Fe(II)-dependent oxygenase superfamily protein | chr1:2025618-2027094 FORWARD LENGTH=365	4e-120	94.34	GO:0009414 GO:0009611 GO:0009867 GO:0042538 GO:0055114	response to water deprivation; "response to wounding"; "jasmonic acid mediated signaling pathway"; "hyperosmotic salinity response"; "oxidation-reduction process"	GO:0016491 GO:0016706	oxidoreductase activity; "oxidoreductase activity, acting on paired donors, with incorporation or reduction of molecular oxygen, 2-oxoglutarate as one donor, and incorporation of one atom each of oxygen into both donors"	GO:0005737	cytoplasm	PF03171	2OG-Fe(II) oxygenase superfamily	PTHR10209 PTHR10209:SF55	FE(II)/ ASCORBATE OXIDASE SUPERFAMILY; "OXIDOREDUCTASE, 2OG-FE(II) OXYGENASE FAMILY PROTEI"	KOG0143	Iron/ascorbate_family_oxidoreductases	NA	NA	NA	NA
Glyma08g18110	844	UniRef100_I1KU21 Uncharacterized protein n=2 Tax=Glycine max RepID=I1KU21_SOYBN	0	99.88	UniRef100_G7IH33 Elongation factor EF-2 n=1 Tax=Medicago truncatula RepID=G7IH33_MEDTR	0	99.88	AT1G56070.1 | Symbols: LOS1 | Ribosomal protein S5/Elongation factor G/III/V family protein | chr1:20968245-20971077 REVERSE LENGTH=843	0	99.88	GO:0009409	response to cold	GO:0003746 GO:0003924 GO:0005507 GO:0005525 GO:0008135	translation elongation factor activity; "GTPase activity"; "copper ion binding"; "GTP binding"; "translation factor activity, nucleic acid binding"	GO:0005730 GO:0005737 GO:0005774 GO:0005829 GO:0005886 GO:0009506 GO:0009507 GO:0016020 GO:0048046	nucleolus; "cytoplasm"; "vacuolar membrane"; "cytosol"; "plasma membrane"; "plasmodesma"; "chloroplast"; "membrane"; "apoplast"	PF03144 PF00679 PF03764 PF00009	Elongation factor Tu domain 2; "Elongation factor G C-terminus"; "Elongation factor G, domain IV"; "Elongation factor Tu GTP binding domain"	PTHR23115 PTHR23115:SF4	TRANSLATION FACTOR; "EUKARYOTIC TRANSLATION ELONGATION FACTOR 2"	KOG0469	Elongation_factor_2	3.6.5.3	NA	K03234	elongation_factor_EF-2_[EC:3.6.5.3]
Glyma08g18121	201	UniRef100_I1KU23 Uncharacterized protein n=1 Tax=Glycine max RepID=I1KU23_SOYBN	1e-131	90.55	UniRef100_G7IH34 Elongation factor EF-2 n=1 Tax=Medicago truncatula RepID=G7IH34_MEDTR	6e-106	89.55	AT1G56070.1 | Symbols: LOS1 | Ribosomal protein S5/Elongation factor G/III/V family protein | chr1:20968245-20971077 REVERSE LENGTH=843	3e-102	89.55	GO:0009409	response to cold	GO:0003746 GO:0003924 GO:0005507 GO:0005525 GO:0008135	translation elongation factor activity; "GTPase activity"; "copper ion binding"; "GTP binding"; "translation factor activity, nucleic acid binding"	GO:0005730 GO:0005737 GO:0005774 GO:0005829 GO:0005886 GO:0009506 GO:0009507 GO:0016020 GO:0048046	nucleolus; "cytoplasm"; "vacuolar membrane"; "cytosol"; "plasma membrane"; "plasmodesma"; "chloroplast"; "membrane"; "apoplast"	PF00009	Elongation factor Tu GTP binding domain	PTHR23115 PTHR23115:SF4	TRANSLATION FACTOR; "EUKARYOTIC TRANSLATION ELONGATION FACTOR 2"	NA	NA	NA	NA	NA	NA
Glyma08g18130	486	UniRef100_I1MJ83 Uncharacterized protein n=1 Tax=Glycine max RepID=I1MJ83_SOYBN	0	99.79	UniRef100_G7IH35 Chitobiosyldiphosphodolichol beta-mannosyltransferase n=1 Tax=Medicago truncatula RepID=G7IH35_MEDTR	0	99.38	AT1G16570.1 | Symbols: | UDP-Glycosyltransferase superfamily protein | chr1:5670763-5673423 REVERSE LENGTH=465	0	97.33	GO:0009058 GO:0016126 GO:0030244 GO:0046520 GO:0048193	biosynthetic process; "sterol biosynthetic process"; "cellulose biosynthetic process"; "sphingoid biosynthetic process"; "Golgi vesicle transport"	GO:0016757	transferase activity, transferring glycosyl groups	NA	NA	PF00534	Glycosyl transferases group 1	PTHR13036	BETA1,4 MANNOSYLTRANSFERASE	KOG2941	Beta-1,4-mannosyltransferase	NA	NA	NA	NA
Glyma08g18141	134	UniRef100_I1KU25 Uncharacterized protein (Fragment) n=1 Tax=Glycine max RepID=I1KU25_SOYBN	5e-77	99.25	UniRef100_G7IH36 Mitotic spindle assembly checkpoint protein MAD2B n=1 Tax=Medicago truncatula RepID=G7IH36_MEDTR	3e-54	99.25	AT1G16590.1 | Symbols: REV7, ATREV7 | DNA-binding HORMA family protein | chr1:5673886-5674890 FORWARD LENGTH=215	5e-24	58.96	GO:0006974 GO:0007094 GO:0010224	response to DNA damage stimulus; "mitotic cell cycle spindle assembly checkpoint"; "response to UV-B"	GO:0003677	DNA binding	GO:0005634	nucleus	NA	NA	PTHR11842 PTHR11842:SF10	MITOTIC SPINDLE ASSEMBLY CHECKPOINT PROTEIN MAD2; "MITOTIC SPINDLE ASSEMBLY CHECKPOINT PROTEIN MAD2B"	NA	NA	NA	NA	NA	NA
Glyma08g18150	254	UniRef100_I1KU26 Uncharacterized protein n=1 Tax=Glycine max RepID=I1KU26_SOYBN	0	99.61	UniRef100_G7IH38 S-RNase binding protein n=1 Tax=Medicago truncatula RepID=G7IH38_MEDTR	4e-96	99.21	AT3G12920.1 | Symbols: | SBP (S-ribonuclease binding protein) family protein | chr3:4122127-4123323 REVERSE LENGTH=335	3e-76	98.43	GO:0043067	regulation of programmed cell death	GO:0008270	zinc ion binding	GO:0005634 GO:0005737	nucleus; "cytoplasm"	NA	NA	PTHR10044	INHIBITOR OF APOPTOSIS	KOG1100	Predicted_E3_ubiquitin_ligase	NA	NA	NA	NA
Glyma08g18160	430	UniRef100_I1KU27 Uncharacterized protein n=2 Tax=Glycine max RepID=I1KU27_SOYBN	0	97.67	UniRef100_B9RF20 Kinesin heavy chain, putative n=1 Tax=Ricinus communis RepID=B9RF20_RICCO	0	100	AT3G63480.2 | Symbols: | ATP binding microtubule motor family protein | chr3:23441065-23443809 REVERSE LENGTH=465	0	98.6	GO:0006261 GO:0007018	DNA-dependent DNA replication; "microtubule-based movement"	GO:0003777 GO:0005524	microtubule motor activity; "ATP binding"	GO:0005737	cytoplasm	PF00225	Kinesin motor domain	PTHR24115 PTHR24115:SF128	FAMILY NOT NAMED; "SUBFAMILY NOT NAMED"	NA	NA	NA	NA	NA	NA
Glyma08g18170	71	UniRef100_I1KU30 Uncharacterized protein n=1 Tax=Glycine max RepID=I1KU30_SOYBN	3e-43	98.59	UniRef100_Q9SKY1 Expressed protein n=1 Tax=Arabidopsis thaliana RepID=Q9SKY1_ARATH	6e-10	66.2	AT2G32190.1 | Symbols: | unknown protein; BEST Arabidopsis thaliana protein match is: unknown protein (TAIR:AT2G32210.1); Has 218 Blast hits to 218 proteins in 24 species: Archae - 0; Bacteria - 0; Metazoa - 0; Fungi - 16; Plants - 202; Viruses - 0; Other Eukaryotes - 0 (source: NCBI BLink). | chr2:13674588-13675092 FORWARD LENGTH=71	1e-12	66.2	GO:0008150 GO:0010200	biological process; "response to chitin"	GO:0003674	molecular function	NA	NA	NA	NA	NA	NA	NA	NA	NA	NA	NA	NA
Glyma08g18181	72	UniRef100_UPI0002338E45 UPI0002338E45 related cluster n=1 Tax=unknown RepID=UPI0002338E45	7e-45	98.61	UniRef100_Q9SKX9 Expressed protein n=1 Tax=Arabidopsis thaliana RepID=Q9SKX9_ARATH	2e-10	83.33	AT2G32210.1 | Symbols: | unknown protein; BEST Arabidopsis thaliana protein match is: unknown protein (TAIR:AT2G32190.1); Has 214 Blast hits to 214 proteins in 21 species: Archae - 0; Bacteria - 0; Metazoa - 1; Fungi - 10; Plants - 203; Viruses - 0; Other Eukaryotes - 0 (source: NCBI BLink). | chr2:13678077-13678554 FORWARD LENGTH=71	5e-13	83.33	GO:0008150	biological process	GO:0003674	molecular function	NA	NA	NA	NA	NA	NA	NA	NA	NA	NA	NA	NA
Glyma08g18190	75	UniRef100_I1KU37 Uncharacterized protein n=1 Tax=Glycine max RepID=I1KU37_SOYBN	2e-45	98.67	UniRef100_Q9SKX9 Expressed protein n=1 Tax=Arabidopsis thaliana RepID=Q9SKX9_ARATH	6e-14	98.67	AT2G32210.1 | Symbols: | unknown protein; BEST Arabidopsis thaliana protein match is: unknown protein (TAIR:AT2G32190.1); Has 214 Blast hits to 214 proteins in 21 species: Archae - 0; Bacteria - 0; Metazoa - 1; Fungi - 10; Plants - 203; Viruses - 0; Other Eukaryotes - 0 (source: NCBI BLink). | chr2:13678077-13678554 FORWARD LENGTH=71	1e-16	98.67	GO:0008150	biological process	GO:0003674	molecular function	NA	NA	NA	NA	NA	NA	NA	NA	NA	NA	NA	NA
Glyma08g18200	72	UniRef100_I1KU33 Uncharacterized protein n=1 Tax=Glycine max RepID=I1KU33_SOYBN	1e-42	95.83	NA	NA	NA	NA	NA	NA	NA	NA	NA	NA	NA	NA	NA	NA	NA	NA	NA	NA	NA	NA	NA	NA
Glyma08g18211	215	UniRef100_I1MDV4 Uncharacterized protein n=1 Tax=Glycine max RepID=I1MDV4_SOYBN	3e-93	80	UniRef100_D4IIB4 Sulphate transporter n=1 Tax=Astragalus crotalariae RepID=D4IIB4_9FABA	4e-84	80	AT1G22150.1 | Symbols: SULTR1;3 | sulfate transporter 1;3 | chr1:7818361-7821344 FORWARD LENGTH=656	2e-71	80	GO:0006810 GO:0008272 GO:0055085	transport; "sulfate transport"; "transmembrane transport"	GO:0005215 GO:0008271 GO:0015116	transporter activity; "secondary active sulfate transmembrane transporter activity"; "sulfate transmembrane transporter activity"	GO:0016020 GO:0016021	membrane; "integral to membrane"	PF00916	Sulfate transporter family	PTHR11814 PTHR11814:SF46	SULFATE TRANSPORTER; "SUBFAMILY NOT NAMED"	NA	NA	NA	NA	NA	NA
Glyma08g18220	68	UniRef100_I1KU36 Uncharacterized protein n=1 Tax=Glycine max RepID=I1KU36_SOYBN	1e-41	98.53	NA	NA	NA	NA	NA	NA	NA	NA	NA	NA	NA	NA	NA	NA	NA	NA	NA	NA	NA	NA	NA	NA
Glyma08g18230	75	UniRef100_I1KU37 Uncharacterized protein n=1 Tax=Glycine max RepID=I1KU37_SOYBN	6e-47	98.67	UniRef100_Q9SKX9 Expressed protein n=1 Tax=Arabidopsis thaliana RepID=Q9SKX9_ARATH	8e-13	98.67	AT2G32210.1 | Symbols: | unknown protein; BEST Arabidopsis thaliana protein match is: unknown protein (TAIR:AT2G32190.1); Has 214 Blast hits to 214 proteins in 21 species: Archae - 0; Bacteria - 0; Metazoa - 1; Fungi - 10; Plants - 203; Viruses - 0; Other Eukaryotes - 0 (source: NCBI BLink). | chr2:13678077-13678554 FORWARD LENGTH=71	2e-15	98.67	GO:0008150	biological process	GO:0003674	molecular function	NA	NA	NA	NA	NA	NA	NA	NA	NA	NA	NA	NA
Glyma08g18240	467	UniRef100_I1KU39 Uncharacterized protein n=1 Tax=Glycine max RepID=I1KU39_SOYBN	0	99.79	UniRef100_G7IJ99 Eukaryotic translation initiation factor 2 subunit n=1 Tax=Medicago truncatula RepID=G7IJ99_MEDTR	0	99.79	AT1G04170.1 | Symbols: EIF2 GAMMA | eukaryotic translation initiation factor 2 gamma subunit | chr1:1097423-1099702 FORWARD LENGTH=465	0	99.14	GO:0009220	pyrimidine ribonucleotide biosynthetic process	GO:0003743 GO:0003924 GO:0005525 GO:0008135	translation initiation factor activity; "GTPase activity"; "GTP binding"; "translation factor activity, nucleic acid binding"	GO:0005737 GO:0005829	cytoplasm; "cytosol"	PF00009 PF09173 PF03144	Elongation factor Tu GTP binding domain; "Initiation factor eIF2 gamma, C terminal"; "Elongation factor Tu domain 2"	PTHR23115 PTHR23115:SF9	TRANSLATION FACTOR; "EUKARYOTIC TRANSLATION INITIATION FACTOR 2 GAMMA SUBUNIT (EIF-2- GAMMA)"	KOG0466	Translation_initiation_factor_2,_gamma_subunit_(eIF-2gamma;_GTPase)	NA	NA	K03242	translation_initiation_factor_eIF-2_gamma_subunit
Glyma08g18255	129	UniRef100_I1MJ64 Uncharacterized protein n=1 Tax=Glycine max RepID=I1MJ64_SOYBN	6e-31	52.71	UniRef100_D7KDE0 F19P19.16 n=1 Tax=Arabidopsis lyrata subsp. lyrata RepID=D7KDE0_ARALL	5e-08	39.53	AT1G04390.1 | Symbols: | BTB/POZ domain-containing protein | chr1:1179678-1183615 REVERSE LENGTH=849	9e-11	39.53	GO:0008150 GO:0009954 GO:0010227 GO:0048439	biological process; "proximal/distal pattern formation"; "floral organ abscission"; "flower morphogenesis"	NA	NA	GO:0009507	chloroplast	NA	NA	NA	NA	NA	NA	NA	NA	NA	NA
Glyma08g18270	828	UniRef100_I1KU42 Uncharacterized protein n=1 Tax=Glycine max RepID=I1KU42_SOYBN	0	99.88	UniRef100_Q0WPK4 AT1G79090 protein n=1 Tax=Arabidopsis thaliana RepID=Q0WPK4_ARATH	0	96.62	AT1G79090.2 | Symbols: | FUNCTIONS IN: molecular_function unknown; INVOLVED IN: biological_process unknown; LOCATED IN: cellular_component unknown; EXPRESSED IN: 25 plant structures; EXPRESSED DURING: 15 growth stages; CONTAINS InterPro DOMAIN/s: Topoisomerase II-associated protein PAT1 (InterPro:IPR019167); BEST Arabidopsis thaliana protein match is: Topoisomerase II-associated protein PAT1 (TAI…	0	96.62	GO:0006486 GO:0008150	protein glycosylation; "biological process"	GO:0003674	molecular function	GO:0005737	cytoplasm	PF09770	Topoisomerase II-associated protein PAT1	PTHR21551	TOPOISOMERASE II-ASSOCIATED PROTEIN PAT1	NA	NA	NA	NA	K12617	DNA_topoisomerase_2-associated_protein_PAT1
Glyma08g18280	939	UniRef100_UPI0002338E48 UPI0002338E48 related cluster n=1 Tax=unknown RepID=UPI0002338E48	0	99.89	UniRef100_Q0WPK4 AT1G79090 protein n=1 Tax=Arabidopsis thaliana RepID=Q0WPK4_ARATH	0	71.67	AT1G79090.2 | Symbols: | FUNCTIONS IN: molecular_function unknown; INVOLVED IN: biological_process unknown; LOCATED IN: cellular_component unknown; EXPRESSED IN: 25 plant structures; EXPRESSED DURING: 15 growth stages; CONTAINS InterPro DOMAIN/s: Topoisomerase II-associated protein PAT1 (InterPro:IPR019167); BEST Arabidopsis thaliana protein match is: Topoisomerase II-associated protein PAT1 (TAI…	0	71.67	GO:0006486 GO:0008150	protein glycosylation; "biological process"	GO:0003674	molecular function	GO:0005737	cytoplasm	PF09770	Topoisomerase II-associated protein PAT1	PTHR21551	TOPOISOMERASE II-ASSOCIATED PROTEIN PAT1	NA	NA	NA	NA	NA	NA
Glyma08g18300	603	UniRef100_I1KU44 Uncharacterized protein n=1 Tax=Glycine max RepID=I1KU44_SOYBN	0	99.83	UniRef100_A2Q289 Peptidase, trypsin-like serine and cysteine proteases n=3 Tax=Medicago truncatula RepID=A2Q289_MEDTR	0	98.84	AT5G45030.2 | Symbols: | Trypsin family protein | chr5:18172981-18175238 FORWARD LENGTH=607	0	98.01	NA	NA	GO:0003824	catalytic activity	GO:0009507	chloroplast	NA	NA	NA	NA	NA	NA	NA	NA	NA	NA
Glyma08g18310	423	UniRef100_I1KU45 Uncharacterized protein n=1 Tax=Glycine max RepID=I1KU45_SOYBN	0	99.76	UniRef100_B9RI44 Ribonucleic acid binding protein S1, putative n=1 Tax=Ricinus communis RepID=B9RI44_RICCO	5e-113	56.26	AT1G16610.1 | Symbols: SR45, RNPS1 | arginine/serine-rich 45 | chr1:5675925-5678686 REVERSE LENGTH=414	1e-67	42.79	GO:0000398 GO:0008380 GO:0010182	mRNA splicing, via spliceosome; "RNA splicing"; "sugar mediated signaling pathway"	GO:0000166 GO:0003676 GO:0003723 GO:0005515	nucleotide binding; "nucleic acid binding"; "RNA binding"; "protein binding"	GO:0005654 GO:0005730 GO:0016607	nucleoplasm; "nucleolus"; "nuclear speck"	PF00076	RNA recognition motif. (a.k.a. RRM, RBD, or RNP domain)	PTHR15481	RIBONUCLEIC ACID BINDING PROTEIN S1	KOG0126	Predicted_RNA-binding_protein_(RRM_superfamily)	NA	NA	K14325	RNA-binding_protein_with_serine-rich_domain_1
Glyma08g18320	505	UniRef100_I1KU46 Uncharacterized protein n=1 Tax=Glycine max RepID=I1KU46_SOYBN	0	99.8	UniRef100_Q9LSI3 Gb|AAF35943.1 n=1 Tax=Arabidopsis thaliana RepID=Q9LSI3_ARATH	0	90.1	AT3G12940.1 | Symbols: | 2-oxoglutarate (2OG) and Fe(II)-dependent oxygenase superfamily protein | chr3:4130242-4131912 REVERSE LENGTH=474	0	90.1	GO:0008150	biological process	GO:0003674	molecular function	GO:0005634	nucleus	NA	NA	NA	NA	NA	NA	NA	NA	NA	NA
Glyma08g18330	241	UniRef100_I1KU48 Uncharacterized protein n=2 Tax=Glycine max RepID=I1KU48_SOYBN	6e-174	99.59	UniRef100_G7IJA0 IojAP protein-like protein n=1 Tax=Medicago truncatula RepID=G7IJA0_MEDTR	9e-136	97.93	AT3G12930.1 | Symbols: | Lojap-related protein | chr3:4128465-4129616 FORWARD LENGTH=238	4e-94	97.93	GO:0006655 GO:0008150 GO:0009073 GO:0010103 GO:0016226 GO:0019288 GO:0045036	phosphatidylglycerol biosynthetic process; "biological process"; "aromatic amino acid family biosynthetic process"; "stomatal complex morphogenesis"; "iron-sulfur cluster assembly"; "isopentenyl diphosphate biosynthetic process, mevalonate-independent pathway"; "protein targeting to chloroplast"	NA	NA	GO:0005739 GO:0009507	mitochondrion; "chloroplast"	PF02410	Domain of unknown function DUF143	PTHR21043	IOJAP SUPERFAMILY ORTHOLOG	NA	NA	NA	NA	NA	NA
Glyma08g18340	77	UniRef100_C6SYK8 Uncharacterized protein n=1 Tax=Glycine max RepID=C6SYK8_SOYBN	3e-49	98.7	UniRef100_Q9SKY1 Expressed protein n=1 Tax=Arabidopsis thaliana RepID=Q9SKY1_ARATH	2e-13	70.13	AT2G32190.1 | Symbols: | unknown protein; BEST Arabidopsis thaliana protein match is: unknown protein (TAIR:AT2G32210.1); Has 218 Blast hits to 218 proteins in 24 species: Archae - 0; Bacteria - 0; Metazoa - 0; Fungi - 16; Plants - 202; Viruses - 0; Other Eukaryotes - 0 (source: NCBI BLink). | chr2:13674588-13675092 FORWARD LENGTH=71	5e-16	70.13	GO:0008150 GO:0010200	biological process; "response to chitin"	GO:0003674	molecular function	NA	NA	NA	NA	NA	NA	NA	NA	NA	NA	NA	NA
qOil-10-2
Glyma10g06760	299	UniRef100_UPI000233CC8B UPI000233CC8B related cluster n=1 Tax=unknown RepID=UPI000233CC8B	0	99.67	UniRef100_B9S0D6 Nucleic acid binding protein, putative n=1 Tax=Ricinus communis RepID=B9S0D6_RICCO	1e-67	99.33	AT2G28200.1 | Symbols: | C2H2-type zinc finger family protein | chr2:12024321-12025181 FORWARD LENGTH=286	1e-52	96.66	GO:0006355 GO:0010228 GO:0016926 GO:0048573 GO:0050665	regulation of transcription, DNA-dependent; "vegetative to reproductive phase transition of meristem"; "protein desumoylation"; "photoperiodism, flowering"; "hydrogen peroxide biosynthetic process"	GO:0003676 GO:0003700 GO:0008270	nucleic acid binding; "sequence-specific DNA binding transcription factor activity"; "zinc ion binding"	GO:0005622 GO:0005634	intracellular; "nucleus"	NA	NA	PTHR26374 PTHR26374:SF459	FAMILY NOT NAMED; ""	NA	NA	NA	NA	NA	NA
Glyma10g06770	205	UniRef100_I1L918 Uncharacterized protein n=1 Tax=Glycine max RepID=I1L918_SOYBN	6e-142	99.51	UniRef100_B9S0D5 Ankyrin repeat-containing protein, putative n=1 Tax=Ricinus communis RepID=B9S0D5_RICCO	5e-92	99.51	AT3G09890.1 | Symbols: | Ankyrin repeat family protein | chr3:3032678-3034158 FORWARD LENGTH=206	1e-77	96.1	GO:0008150	biological process	NA	NA	GO:0005634 GO:0005829	nucleus; "cytosol"	PF00023	Ankyrin repeat	PTHR24136 PTHR24136:SF216	FAMILY NOT NAMED; ""	KOG4214	Myotrophin_and_similar_proteins	NA	NA	NA	NA
Glyma10g06780	213	UniRef100_UPI00019AA8A3 UPI00019AA8A3 related cluster n=1 Tax=unknown RepID=UPI00019AA8A3	4e-152	99.53	UniRef100_Q40206 RAB1X n=1 Tax=Lotus japonicus RepID=Q40206_LOTJA	5e-129	99.53	AT5G03530.1 | Symbols: ATRAB ALPHA, ATRAB, ATRAB18B, ATRABC2A, RABC2A | RAB GTPase homolog C2A | chr5:885741-887061 REVERSE LENGTH=210	2e-125	99.53	GO:0006355 GO:0007264 GO:0015031	regulation of transcription, DNA-dependent; "small GTPase mediated signal transduction"; "protein transport"	GO:0005515 GO:0005524 GO:0005525 GO:0008134 GO:0030742 GO:0080115	protein binding; "ATP binding"; "GTP binding"; "transcription factor binding"; "GTP-dependent protein binding"; "myosin XI tail binding"	GO:0005777 GO:0005794	peroxisome; "Golgi apparatus"	PF00071	Ras family	PTHR24073 PTHR24073:SF482	FAMILY NOT NAMED; ""	KOG0080	GTPase_Rab18,_small_G_protein_superfamily	NA	NA	K07976	Rab_family,_other
Glyma10g06800	825	UniRef100_I1L919 Uncharacterized protein n=1 Tax=Glycine max RepID=I1L919_SOYBN	0	99.88	UniRef100_B9S0D1 Phosphatidylinositol-4-phosphate 5-kinase, putative n=1 Tax=Ricinus communis RepID=B9S0D1_RICCO	0	99.88	AT3G09920.3 | Symbols: PIP5K9 | phosphatidyl inositol monophosphate 5 kinase | chr3:3040426-3043676 REVERSE LENGTH=815	0	98.06	GO:0005975 GO:0006520 GO:0046488	carbohydrate metabolic process; "cellular amino acid metabolic process"; "phosphatidylinositol metabolic process"	GO:0005515 GO:0005524 GO:0016307 GO:0016308	protein binding; "ATP binding"; "phosphatidylinositol phosphate kinase activity"; "1-phosphatidylinositol-4-phosphate 5-kinase activity"	GO:0005634 GO:0005829 GO:0016020	nucleus; "cytosol"; "membrane"	PF01504 PF02493	Phosphatidylinositol-4-phosphate 5-Kinase; "MORN repeat"	PTHR23086 PTHR23086:SF6	PHOSPHATIDYLINOSITOL-4-PHOSPHATE 5-KINASE; "PHOSPHATIDYLINOSITOL-4-PHOSPHATE 5-KINASE"	KOG0229	Phosphatidylinositol-4-phosphate_5-kinase	2.7.1.68	1-phosphatidylinositol-4-phosphate_kinase	K00889	1-phosphatidylinositol-4-phosphate_5-kinase_[EC:2.7.1.68]
Glyma10g06810	432	UniRef100_Q8S4Q4 Nodulin 6l n=2 Tax=Glycine max RepID=Q8S4Q4_SOYBN	0	99.77	UniRef100_Q8S4Q4 Nodulin 6l n=2 Tax=Glycine max RepID=Q8S4Q4_SOYBN	0	99.77	AT3G53180.1 | Symbols: | glutamate-ammonia ligases;catalytics;glutamate-ammonia ligases | chr3:19707068-19711188 FORWARD LENGTH=852	3e-159	92.36	GO:0002679 GO:0006499 GO:0006542 GO:0006569 GO:0006807 GO:0008152 GO:0009399 GO:0009617 GO:0009684 GO:0009737 GO:0010200 GO:0010311 GO:0048829	respiratory burst involved in defense response; "N-terminal protein myristoylation"; "glutamine biosynthetic process"; "tryptophan catabolic process"; "nitrogen compound metabolic process"; "metabolic process"; "nitrogen fixation"; "response to bacterium"; "indoleacetic acid biosynthetic process"; "response to abscisic acid stimulus"; "response to chitin"; "lateral root formation"; "root cap deve…	GO:0003824 GO:0004356 GO:0008017 GO:0043015 GO:0043621	catalytic activity; "glutamate-ammonia ligase activity"; "microtubule binding"; "gamma-tubulin binding"; "protein self-association"	GO:0005737 GO:0005829	cytoplasm; "cytosol"	PF04909	Amidohydrolase	PTHR20852 PTHR20852:SF8	GLUTAMINE SYNTHETASE; "NODULIN / GLUTAMATE-AMMONIA LIGASE-LIKE PROTEIN"	NA	NA	NA	NA	NA	NA
Glyma10g06820	837	UniRef100_I1L922 Uncharacterized protein n=1 Tax=Glycine max RepID=I1L922_SOYBN	0	99.88	UniRef100_I6WUR4 Glutamine synthetase n=1 Tax=Camellia sinensis RepID=I6WUR4_CAMSI	0	99.76	AT3G53180.1 | Symbols: | glutamate-ammonia ligases;catalytics;glutamate-ammonia ligases | chr3:19707068-19711188 FORWARD LENGTH=852	0	99.88	GO:0002679 GO:0006499 GO:0006542 GO:0006569 GO:0006807 GO:0008152 GO:0009399 GO:0009617 GO:0009684 GO:0009737 GO:0010200 GO:0010311 GO:0048829	respiratory burst involved in defense response; "N-terminal protein myristoylation"; "glutamine biosynthetic process"; "tryptophan catabolic process"; "nitrogen compound metabolic process"; "metabolic process"; "nitrogen fixation"; "response to bacterium"; "indoleacetic acid biosynthetic process"; "response to abscisic acid stimulus"; "response to chitin"; "lateral root formation"; "root cap deve…	GO:0003824 GO:0004356 GO:0008017 GO:0043015 GO:0043621	catalytic activity; "glutamate-ammonia ligase activity"; "microtubule binding"; "gamma-tubulin binding"; "protein self-association"	GO:0005737 GO:0005829	cytoplasm; "cytosol"	PF04909 PF00120	Amidohydrolase; "Glutamine synthetase, catalytic domain"	PTHR20852 PTHR20852:SF8	GLUTAMINE SYNTHETASE; "NODULIN / GLUTAMATE-AMMONIA LIGASE-LIKE PROTEIN"	KOG0683	Glutamine_synthetase	NA	NA	NA	NA
Glyma10g06830	244	UniRef100_I1L923 Uncharacterized protein n=1 Tax=Glycine max RepID=I1L923_SOYBN	4e-162	95.08	UniRef100_G7L3Y5 Thaumatin-like protein n=1 Tax=Medicago truncatula RepID=G7L3Y5_MEDTR	2e-116	99.59	AT1G20030.2 | Symbols: | Pathogenesis-related thaumatin superfamily protein | chr1:6945725-6947017 FORWARD LENGTH=316	2e-80	90.57	GO:0051707	response to other organism	GO:0003674	molecular function	GO:0005576 GO:0031225	extracellular region; "anchored to membrane"	PF00314	Thaumatin family	NA	NA	NA	NA	NA	NA	NA	NA
Glyma10g06835	69	UniRef100_I1JHQ7 Uncharacterized protein n=1 Tax=Glycine max RepID=I1JHQ7_SOYBN	2e-08	40.58	NA	NA	NA	NA	NA	NA	NA	NA	NA	NA	NA	NA	NA	NA	NA	NA	NA	NA	NA	NA	NA	NA
Glyma10g06840	62	NA	NA	NA	NA	NA	NA	NA	NA	NA	NA	NA	NA	NA	NA	NA	NA	NA	NA	NA	NA	NA	NA	NA	NA	NA
Glyma10g06855	249	UniRef100_I1LNN4 Uncharacterized protein n=1 Tax=Glycine max RepID=I1LNN4_SOYBN	2e-151	89.16	UniRef100_B9S742 Phosphoinositide 5-phosphatase, putative n=1 Tax=Ricinus communis RepID=B9S742_RICCO	2e-129	90.36	AT1G22620.1 | Symbols: ATSAC1 | Phosphoinositide phosphatase family protein | chr1:7997889-8002787 REVERSE LENGTH=912	5e-117	88.76	GO:0006487 GO:0007010 GO:0007155 GO:0009826 GO:0009832 GO:0010090 GO:0010413 GO:0032957 GO:0045010 GO:0045492 GO:0046855 GO:0048765 GO:0071555	protein N-linked glycosylation; "cytoskeleton organization"; "cell adhesion"; "unidimensional cell growth"; "plant-type cell wall biogenesis"; "trichome morphogenesis"; "glucuronoxylan metabolic process"; "inositol trisphosphate metabolic process"; "actin nucleation"; "xylan biosynthetic process"; "inositol phosphate dephosphorylation"; "root hair cell differentiation"; "cell wall organization"	GO:0004439 GO:0042578	phosphatidylinositol-4,5-bisphosphate 5-phosphatase activity; "phosphoric ester hydrolase activity"	GO:0005634 GO:0005794	nucleus; "Golgi apparatus"	PF02383	SacI homology domain	PTHR11200	INOSITOL 5-PHOSPHATASE	NA	NA	NA	NA	NA	NA
Glyma10g06870	449	UniRef100_I1L924 Uncharacterized protein n=1 Tax=Glycine max RepID=I1L924_SOYBN	0	99.78	UniRef100_G7J1R6 Anthranilate N-benzoyltransferase protein n=1 Tax=Medicago truncatula RepID=G7J1R6_MEDTR	8e-159	99.78	AT2G19070.1 | Symbols: SHT | spermidine hydroxycinnamoyl transferase | chr2:8260185-8261958 REVERSE LENGTH=451	6e-99	99.55	GO:0009555 GO:0010584 GO:0080088	pollen development; "pollen exine formation"; "spermidine hydroxycinnamate conjugate biosynthetic process"	GO:0016410 GO:0016747 GO:0050734 GO:0080072 GO:0080073 GO:0080074 GO:0080075	N-acyltransferase activity; "transferase activity, transferring acyl groups other than amino-acyl groups"; "hydroxycinnamoyltransferase activity"; "spermidine:sinapoyl CoA N-acyltransferase activity"; "spermidine:coumaroyl CoA N-acyltransferase activity"; "spermidine:caffeoyl CoA N-acyltransferase activity"; "spermidine:feruloyl CoA N-acyltransferase activity"	GO:0005737	cytoplasm	PF02458	Transferase family	NA	NA	NA	NA	NA	NA	NA	NA
Glyma10g06880	264	UniRef100_I1L927 Uncharacterized protein n=2 Tax=Glycine max RepID=I1L927_SOYBN	5e-176	91.67	UniRef100_C1K3P2 Thaumatin-like protein n=1 Tax=Pyrus pyrifolia RepID=C1K3P2_PYRPY	1e-126	92.05	AT1G20030.1 | Symbols: | Pathogenesis-related thaumatin superfamily protein | chr1:6945850-6947017 FORWARD LENGTH=299	3e-85	82.58	GO:0051707	response to other organism	GO:0003674	molecular function	GO:0005576 GO:0031225	extracellular region; "anchored to membrane"	PF00314	Thaumatin family	NA	NA	NA	NA	NA	NA	NA	NA
Glyma10g06910	193	UniRef100_I1L926 Uncharacterized protein (Fragment) n=2 Tax=Glycine max RepID=I1L926_SOYBN	4e-114	82.38	UniRef100_G7L3Y5 Thaumatin-like protein n=1 Tax=Medicago truncatula RepID=G7L3Y5_MEDTR	3e-59	84.97	AT1G19320.1 | Symbols: | Pathogenesis-related thaumatin superfamily protein | chr1:6679327-6680178 FORWARD LENGTH=247	2e-35	84.97	GO:0051707	response to other organism	GO:0003674	molecular function	GO:0005576	extracellular region	PF00314	Thaumatin family	NA	NA	NA	NA	NA	NA	NA	NA
Glyma10g06940	243	UniRef100_I1L927 Uncharacterized protein n=2 Tax=Glycine max RepID=I1L927_SOYBN	1e-175	99.59	UniRef100_C1K3P2 Thaumatin-like protein n=1 Tax=Pyrus pyrifolia RepID=C1K3P2_PYRPY	9e-127	99.59	AT1G20030.1 | Symbols: | Pathogenesis-related thaumatin superfamily protein | chr1:6945850-6947017 FORWARD LENGTH=299	6e-85	89.71	GO:0051707	response to other organism	GO:0003674	molecular function	GO:0005576 GO:0031225	extracellular region; "anchored to membrane"	PF00314	Thaumatin family	NA	NA	NA	NA	NA	NA	NA	NA
Glyma10g06960	193	UniRef100_I1L928 Uncharacterized protein n=2 Tax=Glycine max RepID=I1L928_SOYBN	4e-114	82.38	UniRef100_G7L3Y5 Thaumatin-like protein n=1 Tax=Medicago truncatula RepID=G7L3Y5_MEDTR	3e-59	84.97	AT1G19320.1 | Symbols: | Pathogenesis-related thaumatin superfamily protein | chr1:6679327-6680178 FORWARD LENGTH=247	7e-35	84.97	GO:0051707	response to other organism	GO:0003674	molecular function	GO:0005576	extracellular region	PF00314	Thaumatin family	NA	NA	NA	NA	NA	NA	NA	NA
Glyma10g06980	60	UniRef100_I1MIQ9 Uncharacterized protein n=1 Tax=Glycine max RepID=I1MIQ9_SOYBN	3e-31	100	UniRef100_P49208 50S ribosomal protein L1, chloroplastic (Fragment) n=1 Tax=Pisum sativum RepID=RK1_PEA	3e-29	100	AT3G63490.2 | Symbols: | Ribosomal protein L1p/L10e family | chr3:23444269-23445777 FORWARD LENGTH=291	2e-28	100	GO:0006098 GO:0006354 GO:0006412 GO:0009073 GO:0009902 GO:0010027 GO:0015979 GO:0016226 GO:0019288 GO:0034660 GO:0042793 GO:0045036	pentose-phosphate shunt; "DNA-dependent transcription, elongation"; "translation"; "aromatic amino acid family biosynthetic process"; "chloroplast relocation"; "thylakoid membrane organization"; "photosynthesis"; "iron-sulfur cluster assembly"; "isopentenyl diphosphate biosynthetic process, mevalonate-independent pathway"; "ncRNA metabolic process"; "transcription from plastid promoter"; "protein…	GO:0003723 GO:0003735	RNA binding; "structural constituent of ribosome"	GO:0005634 GO:0005840 GO:0009507 GO:0009535 GO:0009570 GO:0009941 GO:0016020	nucleus; "ribosome"; "chloroplast"; "chloroplast thylakoid membrane"; "chloroplast stroma"; "chloroplast envelope"; "membrane"	PF00687	Ribosomal protein L1p/L10e family	PTHR23105 PTHR23105:SF5	60S RIBOSOMAL PROTEIN L10A - RELATED; "50S RIBOSOMAL PROTEIN L1P"	NA	NA	NA	NA	NA	NA
Glyma10g06990	337	UniRef100_UPI000233C79F UPI000233C79F related cluster n=1 Tax=unknown RepID=UPI000233C79F	0	99.7	UniRef100_G7J1R6 Anthranilate N-benzoyltransferase protein n=1 Tax=Medicago truncatula RepID=G7J1R6_MEDTR	6e-109	99.7	AT2G19070.1 | Symbols: SHT | spermidine hydroxycinnamoyl transferase | chr2:8260185-8261958 REVERSE LENGTH=451	7e-65	99.11	GO:0009555 GO:0010584 GO:0080088	pollen development; "pollen exine formation"; "spermidine hydroxycinnamate conjugate biosynthetic process"	GO:0016410 GO:0016747 GO:0050734 GO:0080072 GO:0080073 GO:0080074 GO:0080075	N-acyltransferase activity; "transferase activity, transferring acyl groups other than amino-acyl groups"; "hydroxycinnamoyltransferase activity"; "spermidine:sinapoyl CoA N-acyltransferase activity"; "spermidine:coumaroyl CoA N-acyltransferase activity"; "spermidine:caffeoyl CoA N-acyltransferase activity"; "spermidine:feruloyl CoA N-acyltransferase activity"	GO:0005737	cytoplasm	PF02458	Transferase family	NA	NA	NA	NA	NA	NA	NA	NA
Glyma10g07005	92	UniRef100_I1KKS0 Uncharacterized protein n=1 Tax=Glycine max RepID=I1KKS0_SOYBN	4e-46	97.83	UniRef100_G7ISE8 Ethylene-responsive transcription factor n=1 Tax=Medicago truncatula RepID=G7ISE8_MEDTR	7e-37	88.04	AT5G44210.1 | Symbols: ERF9, ATERF9, ATERF-9 | erf domain protein 9 | chr5:17806742-17807344 FORWARD LENGTH=200	2e-33	70.65	GO:0006355 GO:0006857 GO:0009873 GO:0045892	regulation of transcription, DNA-dependent; "oligopeptide transport"; "ethylene mediated signaling pathway"; "negative regulation of transcription, DNA-dependent"	GO:0003677 GO:0003700	DNA binding; "sequence-specific DNA binding transcription factor activity"	GO:0005634 GO:0016020	nucleus; "membrane"	PF00847	AP2 domain	NA	NA	NA	NA	NA	NA	NA	NA
Glyma10g07020	62	NA	NA	NA	NA	NA	NA	NA	NA	NA	NA	NA	NA	NA	NA	NA	NA	NA	NA	NA	NA	NA	NA	NA	NA	NA
Glyma10g07030	84	NA	NA	NA	NA	NA	NA	NA	NA	NA	NA	NA	NA	NA	NA	NA	NA	NA	NA	NA	NA	NA	NA	NA	NA	NA
Glyma10g07050	262	UniRef100_I1L930 Uncharacterized protein n=1 Tax=Glycine max RepID=I1L930_SOYBN	1e-175	92.37	UniRef100_C1K3P2 Thaumatin-like protein n=1 Tax=Pyrus pyrifolia RepID=C1K3P2_PYRPY	1e-125	92.75	AT1G20030.1 | Symbols: | Pathogenesis-related thaumatin superfamily protein | chr1:6945850-6947017 FORWARD LENGTH=299	4e-85	83.21	GO:0051707	response to other organism	GO:0003674	molecular function	GO:0005576 GO:0031225	extracellular region; "anchored to membrane"	PF00314	Thaumatin family	NA	NA	NA	NA	NA	NA	NA	NA
Glyma10g07060	467	UniRef100_UPI000233CDF8 UPI000233CDF8 related cluster n=1 Tax=unknown RepID=UPI000233CDF8	0	99.79	UniRef100_B9T433 3'-N-debenzoyl-2'-deoxytaxol N-benzoyltransferase, putative n=1 Tax=Ricinus communis RepID=B9T433_RICCO	3e-117	98.72	AT3G26040.1 | Symbols: | HXXXD-type acyl-transferase family protein | chr3:9519741-9521069 FORWARD LENGTH=442	1e-85	98.5	NA	NA	GO:0016740 GO:0016747	transferase activity; "transferase activity, transferring acyl groups other than amino-acyl groups"	GO:0005737	cytoplasm	PF02458	Transferase family	NA	NA	NA	NA	NA	NA	NA	NA
Glyma10g07075	241	UniRef100_UPI000233CDFA UPI000233CDFA related cluster n=1 Tax=unknown RepID=UPI000233CDFA	5e-175	99.59	UniRef100_B9S0C6 Protein P21, putative n=1 Tax=Ricinus communis RepID=B9S0C6_RICCO	2e-78	98.76	AT4G38660.1 | Symbols: | Pathogenesis-related thaumatin superfamily protein | chr4:18066448-18067984 REVERSE LENGTH=345	1e-37	97.1	GO:0009664 GO:0010075 GO:0042545 GO:0048653 GO:0051707	plant-type cell wall organization; "regulation of meristem growth"; "cell wall modification"; "anther development"; "response to other organism"	GO:0003674	molecular function	GO:0005576 GO:0031225	extracellular region; "anchored to membrane"	PF00314	Thaumatin family	NA	NA	NA	NA	NA	NA	NA	NA
Glyma10g07090	487	UniRef100_I1L932 Uncharacterized protein n=1 Tax=Glycine max RepID=I1L932_SOYBN	0	99.79	UniRef100_Q8S995 Glucosyltransferase-14 n=1 Tax=Vigna angularis RepID=Q8S995_PHAAN	0	95.69	AT2G36760.1 | Symbols: UGT73C2 | UDP-glucosyl transferase 73C2 | chr2:15413042-15414532 REVERSE LENGTH=496	0	97.33	GO:0008152	metabolic process	GO:0008194 GO:0016757 GO:0016758	UDP-glycosyltransferase activity; "transferase activity, transferring glycosyl groups"; "transferase activity, transferring hexosyl groups"	GO:0009507	chloroplast	PF00201	UDP-glucoronosyl and UDP-glucosyl transferase	PTHR11926 PTHR11926:SF15	GLUCOSYL/GLUCURONOSYL TRANSFERASES; "UDP-GLUCURONOSYLTRANSFERASE RELATED"	KOG1192	UDP-glucuronosyl_and_UDP-glucosyl_transferase	2.4.1.-	Hexosyltransferases	K13496	UDP-glucosyl_transferase_73C_[EC:2.4.1.-]
Glyma10g07110	504	UniRef100_I1L933 Uncharacterized protein n=1 Tax=Glycine max RepID=I1L933_SOYBN	0	99.8	UniRef100_G7JZ63 Cytokinin-O-glucosyltransferase n=1 Tax=Medicago truncatula RepID=G7JZ63_MEDTR	0	98.81	AT2G36780.1 | Symbols: | UDP-Glycosyltransferase superfamily protein | chr2:15417618-15419108 REVERSE LENGTH=496	7e-118	97.02	GO:0008152	metabolic process	GO:0008194 GO:0016757 GO:0016758	UDP-glycosyltransferase activity; "transferase activity, transferring glycosyl groups"; "transferase activity, transferring hexosyl groups"	GO:0009507	chloroplast	PF00201	UDP-glucoronosyl and UDP-glucosyl transferase	PTHR11926 PTHR11926:SF15	GLUCOSYL/GLUCURONOSYL TRANSFERASES; "UDP-GLUCURONOSYLTRANSFERASE RELATED"	KOG1192	UDP-glucuronosyl_and_UDP-glucosyl_transferase	NA	NA	NA	NA
Glyma10g07120	104	UniRef100_I1L934 Histone H4 n=1 Tax=Glycine max RepID=I1L934_SOYBN	6e-65	99.04	UniRef100_I1L934 Histone H4 n=1 Tax=Glycine max RepID=I1L934_SOYBN	6e-65	99.04	AT5G59970.1 | Symbols: | Histone superfamily protein | chr5:24146352-24146663 REVERSE LENGTH=103	2e-51	82.69	GO:0006334	nucleosome assembly	GO:0003677	DNA binding	GO:0000786 GO:0005634 GO:0005773	nucleosome; "nucleus"; "vacuole"	PF00125	Core histone H2A/H2B/H3/H4	PTHR10484	HISTONE H4	KOG3467	Histone_H4	NA	NA	NA	NA
Glyma10g07133	83	UniRef100_I1L935 Uncharacterized protein n=1 Tax=Glycine max RepID=I1L935_SOYBN	2e-44	87.95	UniRef100_C6ZRX5 Pto kinase interactor n=1 Tax=Glycine max RepID=C6ZRX5_SOYBN	3e-08	32.53	AT2G47060.4 | Symbols: | Protein kinase superfamily protein | chr2:19333116-19334759 REVERSE LENGTH=397	6e-13	61.45	GO:0006468 GO:0006979	protein phosphorylation; "response to oxidative stress"	GO:0004672 GO:0004674 GO:0004713 GO:0005524 GO:0016301 GO:0016772	protein kinase activity; "protein serine/threonine kinase activity"; "protein tyrosine kinase activity"; "ATP binding"; "kinase activity"; "transferase activity, transferring phosphorus-containing groups"	GO:0005634 GO:0005737 GO:0005886	nucleus; "cytoplasm"; "plasma membrane"	NA	NA	PTHR24420 PTHR24420:SF870	FAMILY NOT NAMED; ""	NA	NA	NA	NA	NA	NA
Glyma10g07146	156	UniRef100_I1L935 Uncharacterized protein n=1 Tax=Glycine max RepID=I1L935_SOYBN	5e-38	44.23	UniRef100_Q6XP48 UDP-Glc-4-epimerase n=1 Tax=Solanum tuberosum RepID=Q6XP48_SOLTU	8e-11	30.77	AT1G63180.1 | Symbols: UGE3 | UDP-D-glucose/UDP-D-galactose 4-epimerase 3 | chr1:23427559-23429384 REVERSE LENGTH=351	1e-11	29.49	GO:0006012 GO:0009555 GO:0044237	galactose metabolic process; "pollen development"; "cellular metabolic process"	GO:0000166 GO:0003824 GO:0003978 GO:0046983 GO:0050662	nucleotide binding; "catalytic activity"; "UDP-glucose 4-epimerase activity"; "protein dimerization activity"; "coenzyme binding"	GO:0005794	Golgi apparatus	PF10440	WIYLD domain	NA	NA	NA	NA	NA	NA	NA	NA
Glyma10g07160	489	UniRef100_I1L936 Uncharacterized protein n=1 Tax=Glycine max RepID=I1L936_SOYBN	0	99.8	UniRef100_G7JZ62 Cytokinin-O-glucosyltransferase n=1 Tax=Medicago truncatula RepID=G7JZ62_MEDTR	0	99.8	AT3G53150.1 | Symbols: UGT73D1 | UDP-glucosyl transferase 73D1 | chr3:19697736-19699259 REVERSE LENGTH=507	0	98.16	GO:0006865 GO:0008152	amino acid transport; "metabolic process"	GO:0008194 GO:0016758	UDP-glycosyltransferase activity; "transferase activity, transferring hexosyl groups"	NA	NA	PF00201	UDP-glucoronosyl and UDP-glucosyl transferase	PTHR11926 PTHR11926:SF15	GLUCOSYL/GLUCURONOSYL TRANSFERASES; "UDP-GLUCURONOSYLTRANSFERASE RELATED"	KOG1192	UDP-glucuronosyl_and_UDP-glucosyl_transferase	NA	NA	NA	NA
Glyma10g07170	781	UniRef100_UPI000233C907 UPI000233C907 related cluster n=1 Tax=unknown RepID=UPI000233C907	0	99.87	UniRef100_G7L4X9 Chromodomain-helicase-DNA-binding protein n=1 Tax=Medicago truncatula RepID=G7L4X9_MEDTR	0	83.87	AT2G36720.1 | Symbols: | Acyl-CoA N-acyltransferase with RING/FYVE/PHD-type zinc finger domain | chr2:15393447-15399189 FORWARD LENGTH=1007	0	91.81	GO:0006355 GO:0009630	regulation of transcription, DNA-dependent; "gravitropism"	GO:0003677 GO:0008270	DNA binding; "zinc ion binding"	GO:0005634	nucleus	PF00628	PHD-finger	NA	NA	NA	NA	NA	NA	NA	NA
Glyma10g07180	36	NA	NA	NA	NA	NA	NA	NA	NA	NA	NA	NA	NA	NA	NA	NA	NA	NA	NA	NA	NA	NA	NA	NA	NA	NA
Glyma10g07190	1243	UniRef100_G7IA77 RRP1 n=1 Tax=Medicago truncatula RepID=G7IA77_MEDTR	0	93.89	UniRef100_G7IA77 RRP1 n=1 Tax=Medicago truncatula RepID=G7IA77_MEDTR	0	93.89	AT1G22060.1 | Symbols: | LOCATED IN: vacuole; EXPRESSED IN: 23 plant structures; EXPRESSED DURING: 13 growth stages; BEST Arabidopsis thaliana protein match is: FBD, F-box and Leucine Rich Repeat domains containing protein (TAIR:AT1G22000.1); Has 84739 Blast hits to 38714 proteins in 2257 species: Archae - 1436; Bacteria - 11314; Metazoa - 40747; Fungi - 7706; Plants - 4675; Viruses - 308; Other …	8e-32	12.07	GO:0010075	regulation of meristem growth	NA	NA	GO:0005737 GO:0005773	cytoplasm; "vacuole"	NA	NA	NA	NA	NA	NA	NA	NA	NA	NA
Glyma10g07210	538	UniRef100_I1L941 Uncharacterized protein n=1 Tax=Glycine max RepID=I1L941_SOYBN	0	99.81	UniRef100_G7IA76 Cytochrome P450 monooxygenase CYP97C10 n=1 Tax=Medicago truncatula RepID=G7IA76_MEDTR	0	94.42	AT3G53130.1 | Symbols: LUT1, CYP97C1 | Cytochrome P450 superfamily protein | chr3:19692812-19695278 FORWARD LENGTH=539	0	95.35	GO:0006636 GO:0009965 GO:0010103 GO:0015995 GO:0016117 GO:0016556 GO:0019288 GO:0030154 GO:0055114	unsaturated fatty acid biosynthetic process; "leaf morphogenesis"; "stomatal complex morphogenesis"; "chlorophyll biosynthetic process"; "carotenoid biosynthetic process"; "mRNA modification"; "isopentenyl diphosphate biosynthetic process, mevalonate-independent pathway"; "cell differentiation"; "oxidation-reduction process"	GO:0005506 GO:0009055 GO:0009974 GO:0016705 GO:0019825 GO:0020037	iron ion binding; "electron carrier activity"; "zeinoxanthin epsilon hydroxylase activity"; "oxidoreductase activity, acting on paired donors, with incorporation or reduction of molecular oxygen"; "oxygen binding"; "heme binding"	GO:0009507 GO:0009941	chloroplast; "chloroplast envelope"	PF00067	Cytochrome P450	PTHR24290 PTHR24290:SF151	FAMILY NOT NAMED; ""	KOG0157	Cytochrome_P450_CYP4/CYP19/CYP26_subfamilies	NA	NA	K09837	carotenoid_epsilon-ring_hydroxylase
Glyma10g07220	383	UniRef100_I1L942 Uncharacterized protein n=1 Tax=Glycine max RepID=I1L942_SOYBN	0	99.74	UniRef100_G7IA68 Naringenin,2-oxoglutarate 3-dioxygenase n=1 Tax=Medicago truncatula RepID=G7IA68_MEDTR	0	96.61	AT2G36690.1 | Symbols: | 2-oxoglutarate (2OG) and Fe(II)-dependent oxygenase superfamily protein | chr2:15379930-15381987 FORWARD LENGTH=366	3e-169	98.96	GO:0009058 GO:0055114	biosynthetic process; "oxidation-reduction process"	GO:0016491 GO:0016706	oxidoreductase activity; "oxidoreductase activity, acting on paired donors, with incorporation or reduction of molecular oxygen, 2-oxoglutarate as one donor, and incorporation of one atom each of oxygen into both donors"	GO:0005737	cytoplasm	PF03171	2OG-Fe(II) oxygenase superfamily	PTHR10209 PTHR10209:SF55	FE(II)/ ASCORBATE OXIDASE SUPERFAMILY; "OXIDOREDUCTASE, 2OG-FE(II) OXYGENASE FAMILY PROTEI"	KOG0143	Iron/ascorbate_family_oxidoreductases	NA	NA	NA	NA
Glyma10g07230	572	UniRef100_I1L943 Uncharacterized protein n=3 Tax=Glycine max RepID=I1L943_SOYBN	0	99.83	UniRef100_G7IA71 Uracil transporter-like protein n=1 Tax=Medicago truncatula RepID=G7IA71_MEDTR	0	99.13	AT5G03555.1 | Symbols: | permease, cytosine/purines, uracil, thiamine, allantoin family protein | chr5:898354-900153 REVERSE LENGTH=599	0	86.54	GO:0009411 GO:0009813 GO:0015931 GO:0043100	response to UV; "flavonoid biosynthetic process"; "nucleobase-containing compound transport"; "pyrimidine nucleobase salvage"	GO:0015205	nucleobase transmembrane transporter activity	GO:0009507 GO:0009526 GO:0016020	chloroplast; "plastid envelope"; "membrane"	PF02133	Permease for cytosine/purines, uracil, thiamine, allantoin	NA	NA	KOG2466	Uridine_permease/thiamine_transporter/allantoin_transport	NA	NA	K03457	nucleobase:cation_symporter-1,_NCS1_family
Glyma10g07240	223	UniRef100_I1L944 Uncharacterized protein n=1 Tax=Glycine max RepID=I1L944_SOYBN	1e-165	99.55	UniRef100_D6MKH3 Transcription factor n=1 Tax=Lycoris longituba RepID=D6MKH3_9ASPA	5e-71	90.58	AT1G32700.1 | Symbols: | PLATZ transcription factor family protein | chr1:11827588-11829444 FORWARD LENGTH=213	2e-70	93.27	NA	NA	NA	NA	GO:0005634	nucleus	PF04640	PLATZ transcription factor	NA	NA	NA	NA	NA	NA	NA	NA
Glyma10g07251	193	UniRef100_UPI000233CE00 UPI000233CE00 related cluster n=1 Tax=unknown RepID=UPI000233CE00	4e-137	99.48	UniRef100_G7L4Z0 Vacuolar protein-sorting-associated protein-like protein n=1 Tax=Medicago truncatula RepID=G7L4Z0_MEDTR	2e-85	87.56	AT3G53120.1 | Symbols: VPS37-1 | Modifier of rudimentary (Mod(r)) protein | chr3:19690729-19692490 REVERSE LENGTH=217	5e-76	88.6	NA	NA	GO:0005515	protein binding	GO:0000813 GO:0005634	ESCRT I complex; "nucleus"	PF07200	Modifier of rudimentary (Mod(r)) protein	PTHR13678 PTHR13678:SF1	WILLIAMS-BEUREN SYNDROME CRITICAL REGION PROTEIN-RELATED; "gb def: similar to hypothetical protein flj12750 [mus musculus]"	KOG3270	Uncharacterized_conserved_protein	NA	NA	NA	NA
Glyma10g07260	217	UniRef100_I1L947 Uncharacterized protein n=1 Tax=Glycine max RepID=I1L947_SOYBN	1e-155	99.54	UniRef100_G7IA78 DnaJ homolog subfamily C member n=1 Tax=Medicago truncatula RepID=G7IA78_MEDTR	5e-105	99.08	AT5G03560.1 | Symbols: | Tetratricopeptide repeat (TPR)-like superfamily protein | chr5:900673-902719 REVERSE LENGTH=241	4e-93	98.16	GO:0015931	nucleobase-containing compound transport	GO:0015391	nucleobase:cation symporter activity	GO:0009507	chloroplast	PF09350	Domain of unknown function (DUF1992)	NA	NA	NA	NA	NA	NA	NA	NA
Glyma10g07270	473	UniRef100_UPI000233CE01 UPI000233CE01 related cluster n=1 Tax=unknown RepID=UPI000233CE01	0	95.77	UniRef100_G7IA56 Aspartic proteinase-like protein n=1 Tax=Medicago truncatula RepID=G7IA56_MEDTR	0	95.35	AT2G36670.2 | Symbols: | Eukaryotic aspartyl protease family protein | chr2:15364949-15368016 REVERSE LENGTH=507	0	90.7	GO:0006499 GO:0006508 GO:0006635 GO:0016558	N-terminal protein myristoylation; "proteolysis"; "fatty acid beta-oxidation"; "protein import into peroxisome matrix"	GO:0004190	aspartic-type endopeptidase activity	GO:0005576	extracellular region	PF00026	Eukaryotic aspartyl protease	PTHR13683 PTHR13683:SF98	ASPARTYL PROTEASES; "CHLOROPLAST NUCLEIOD DNA-BINDING-RELATED"	KOG1339	Aspartyl_protease	NA	NA	NA	NA
Glyma10g07280	490	UniRef100_UPI000233CE02 UPI000233CE02 related cluster n=1 Tax=unknown RepID=UPI000233CE02	0	99.59	UniRef100_G7L4Y5 Polyadenylate binding protein n=1 Tax=Medicago truncatula RepID=G7L4Y5_MEDTR	0	98.57	AT2G36660.1 | Symbols: PAB7 | poly(A) binding protein 7 | chr2:15361476-15364398 REVERSE LENGTH=609	4e-174	97.96	NA	NA	GO:0000166 GO:0003676 GO:0003723 GO:0003743	nucleotide binding; "nucleic acid binding"; "RNA binding"; "translation initiation factor activity"	NA	NA	PF00076	RNA recognition motif. (a.k.a. RRM, RBD, or RNP domain)	PTHR24012 PTHR24012:SF159	FAMILY NOT NAMED; "SUBFAMILY NOT NAMED"	KOG0123	Polyadenylate-binding_protein_(RRM_superfamily)	NA	NA	NA	NA
Glyma10g07290	234	UniRef100_I1L950 Peptidyl-prolyl cis-trans isomerase n=2 Tax=Glycine max RepID=I1L950_SOYBN	3e-170	99.57	UniRef100_I1L950 Peptidyl-prolyl cis-trans isomerase n=2 Tax=Glycine max RepID=I1L950_SOYBN	3e-170	99.57	AT3G10060.1 | Symbols: | FKBP-like peptidyl-prolyl cis-trans isomerase family protein | chr3:3102291-3103801 FORWARD LENGTH=230	1e-104	99.57	GO:0000413 GO:0006457 GO:0018208 GO:0042631	protein peptidyl-prolyl isomerization; "protein folding"; "peptidyl-proline modification"; "cellular response to water deprivation"	GO:0003755 GO:0005528	peptidyl-prolyl cis-trans isomerase activity; "FK506 binding"	GO:0005634 GO:0009507 GO:0009534 GO:0009535 GO:0009543 GO:0009579	nucleus; "chloroplast"; "chloroplast thylakoid"; "chloroplast thylakoid membrane"; "chloroplast thylakoid lumen"; "thylakoid"	PF00254	FKBP-type peptidyl-prolyl cis-trans isomerase	PTHR10516	FK506 BINDING PROTEIN	KOG0552	FKBP-type_peptidyl-prolyl_cis-trans_isomerase	NA	NA	NA	NA
Glyma10g07300	451	UniRef100_UPI000233C917 UPI000233C917 related cluster n=1 Tax=unknown RepID=UPI000233C917	0	99.78	UniRef100_G7I9D9 Protein CHUP1 n=1 Tax=Medicago truncatula RepID=G7I9D9_MEDTR	3e-141	99.78	AT2G36650.1 | Symbols: | unknown protein; Has 35333 Blast hits to 34131 proteins in 2444 species: Archae - 798; Bacteria - 22429; Metazoa - 974; Fungi - 991; Plants - 531; Viruses - 0; Other Eukaryotes - 9610 (source: NCBI BLink). | chr2:15359994-15361194 FORWARD LENGTH=373	4e-35	69.4	GO:0008150	biological process	GO:0003674	molecular function	GO:0005737	cytoplasm	NA	NA	NA	NA	NA	NA	NA	NA	NA	NA
Glyma10g07320	532	UniRef100_I1KFS7 Pectinesterase (Fragment) n=2 Tax=Glycine max RepID=I1KFS7_SOYBN	0	95.11	UniRef100_I1KFS7 Pectinesterase (Fragment) n=2 Tax=Glycine max RepID=I1KFS7_SOYBN	0	95.11	AT5G51500.1 | Symbols: | Plant invertase/pectin methylesterase inhibitor superfamily | chr5:20917929-20919838 REVERSE LENGTH=540	0	94.17	GO:0009832 GO:0010413 GO:0042545 GO:0045492	plant-type cell wall biogenesis; "glucuronoxylan metabolic process"; "cell wall modification"; "xylan biosynthetic process"	GO:0004857 GO:0030599	enzyme inhibitor activity; "pectinesterase activity"	GO:0005576 GO:0005618 GO:0009505	extracellular region; "cell wall"; "plant-type cell wall"	PF01095 PF04043	Pectinesterase; "Plant invertase/pectin methylesterase inhibitor"	PTHR22931 PTHR22931:SF5	PHOSPHOENOLPYRUVATE DIKINASE-RELATED; "METHYLESTERASE INHIBITOR-RELATED"	NA	NA	NA	NA	NA	NA
Glyma10g07340	603	UniRef100_I1L954 Uncharacterized protein n=1 Tax=Glycine max RepID=I1L954_SOYBN	0	99.83	UniRef100_G7I9D6 Threonine dehydratase biosynthetic n=1 Tax=Medicago truncatula RepID=G7I9D6_MEDTR	0	99.83	AT3G10050.1 | Symbols: OMR1 | L-O-methylthreonine resistant 1 | chr3:3099164-3101741 REVERSE LENGTH=592	0	88.06	GO:0006094 GO:0006520 GO:0006566 GO:0007010 GO:0008152 GO:0009097 GO:0010498	gluconeogenesis; "cellular amino acid metabolic process"; "threonine metabolic process"; "cytoskeleton organization"; "metabolic process"; "isoleucine biosynthetic process"; "proteasomal protein catabolic process"	GO:0003824 GO:0004794 GO:0030170	catalytic activity; "L-threonine ammonia-lyase activity"; "pyridoxal phosphate binding"	GO:0009507	chloroplast	PF00291 PF00585	Pyridoxal-phosphate dependent enzyme; "C-terminal regulatory domain of Threonine dehydratase"	PTHR10314 PTHR10314:SF30	PYRIDOXAL-5-PHOSPHATE DEPENDENT BETA FAMILY; "THREONINE DEHYDRATASE"	KOG1250	Threonine/serine_dehydratases	4.3.1.19	threonine_ammonia-lyase	K01754	threonine_dehydratase_[EC:4.3.1.19]
Glyma10g07351	322	UniRef100_I1N2S8 Uncharacterized protein n=3 Tax=Glycine max RepID=I1N2S8_SOYBN	5e-98	99.38	UniRef100_G7L1B0 Tyrosine/dopa decarboxylase n=1 Tax=Medicago truncatula RepID=G7L1B0_MEDTR	5e-40	99.38	NA	NA	NA	NA	NA	NA	NA	NA	NA	PF05056	Protein of unknown function (DUF674)	NA	NA	NA	NA	NA	NA	NA	NA
Glyma10g07360	524	UniRef100_I1L955 Uncharacterized protein n=1 Tax=Glycine max RepID=I1L955_SOYBN	0	99.81	UniRef100_B9SRL1 Catalytic, putative n=1 Tax=Ricinus communis RepID=B9SRL1_RICCO	0	94.66	AT5G03795.1 | Symbols: | Exostosin family protein | chr5:1007554-1010373 REVERSE LENGTH=518	0	97.52	NA	NA	NA	NA	GO:0005794 GO:0016020	Golgi apparatus; "membrane"	PF03016	Exostosin family	PTHR11062 PTHR11062:SF1	EXOSTOSIN (HEPARAN SULFATE GLYCOSYLTRANSFERASE)-RELATED; "EXOSTOSIN RELATED"	KOG1021	Acetylglucosaminyltransferase_EXT1/exostosin_1	NA	NA	NA	NA
Glyma10g07381	72	UniRef100_I1M8N2 Uncharacterized protein n=1 Tax=Glycine max RepID=I1M8N2_SOYBN	4e-16	56.94	UniRef100_G7I3I9 Remorin n=1 Tax=Medicago truncatula RepID=G7I3I9_MEDTR	4e-12	56.94	NA	NA	NA	NA	NA	NA	NA	NA	NA	NA	NA	NA	NA	NA	NA	NA	NA	NA	NA
Glyma10g07400	492	UniRef100_UPI000233D05E UPI000233D05E related cluster n=1 Tax=unknown RepID=UPI000233D05E	0	98.98	UniRef100_B9SRL1 Catalytic, putative n=1 Tax=Ricinus communis RepID=B9SRL1_RICCO	0	79.88	AT5G03795.1 | Symbols: | Exostosin family protein | chr5:1007554-1010373 REVERSE LENGTH=518	0	97.76	NA	NA	NA	NA	GO:0005794 GO:0016020	Golgi apparatus; "membrane"	PF03016	Exostosin family	PTHR11062 PTHR11062:SF1	EXOSTOSIN (HEPARAN SULFATE GLYCOSYLTRANSFERASE)-RELATED; "EXOSTOSIN RELATED"	KOG1021	Acetylglucosaminyltransferase_EXT1/exostosin_1	NA	NA	NA	NA
Glyma10g07410	450	UniRef100_I1L957 Uncharacterized protein n=1 Tax=Glycine max RepID=I1L957_SOYBN	0	99.78	UniRef100_Q39871 Late embryongenesis abundant protein n=2 Tax=Glycine max RepID=Q39871_SOYBN	0	95.11	AT2G36640.1 | Symbols: ATECP63, ECP63 | embryonic cell protein 63 | chr2:15357019-15358552 REVERSE LENGTH=448	9e-78	97.33	GO:0009793	embryo development ending in seed dormancy	NA	NA	GO:0005575	cellular component	PF02987	Late embryogenesis abundant protein	PTHR23241 PTHR23241:SF11	LATE EMBRYOGENESIS ABUNDANT (PLANTS) LEA-RELATED; "LATE EMBRYOGENESIS ABUNDANT (LEA)"	KOG4744	Uncharacterized_conserved_protein	NA	NA	NA	NA
Glyma10g07420	465	UniRef100_UPI000233CA94 UPI000233CA94 related cluster n=1 Tax=unknown RepID=UPI000233CA94	0	99.78	UniRef100_Q75GI8 Expressed protein n=1 Tax=Oryza sativa Japonica Group RepID=Q75GI8_ORYSJ	1e-172	89.25	AT2G36630.1 | Symbols: | Sulfite exporter TauE/SafE family protein | chr2:15352767-15355050 REVERSE LENGTH=459	0	98.28	GO:0006499	N-terminal protein myristoylation	NA	NA	GO:0016021	integral to membrane	PF01925	Sulfite exporter TauE/SafE	PTHR14255	ATP-DEPENDENT PROTEASE (CEREBLON)	NA	NA	NA	NA	NA	NA
Glyma10g07430	548	UniRef100_I1L959 Uncharacterized protein n=1 Tax=Glycine max RepID=I1L959_SOYBN	0	99.82	UniRef100_G7I9C7 Serine/threonine protein kinase SRPK1 n=1 Tax=Medicago truncatula RepID=G7I9C7_MEDTR	0	97.08	AT3G53030.1 | Symbols: SRPK4 | ser/arg-rich protein kinase 4 | chr3:19662412-19664362 FORWARD LENGTH=529	0	95.99	GO:0006468 GO:0006979	protein phosphorylation; "response to oxidative stress"	GO:0004672 GO:0004674 GO:0004713 GO:0005524 GO:0016301 GO:0016772	protein kinase activity; "protein serine/threonine kinase activity"; "protein tyrosine kinase activity"; "ATP binding"; "kinase activity"; "transferase activity, transferring phosphorus-containing groups"	GO:0005634	nucleus	PF00069	Protein kinase domain	PTHR24055 PTHR24055:SF118	MITOGEN-ACTIVATED PROTEIN KINASE; ""	KOG1290	Serine/threonine_protein_kinase	2.7.1.-	Phosphotransferases_with_an_alcohol_group_as_acceptor.	K00924	phosphatidylinositol-4-phosphate_3-kinase_[EC:2.7.1.154]
Glyma10g07440	226	UniRef100_UPI000233CA99 UPI000233CA99 related cluster n=1 Tax=unknown RepID=UPI000233CA99	3e-167	99.56	UniRef100_G7I9C4 Homeobox-leucine zipper protein ATHB-22 n=1 Tax=Medicago truncatula RepID=G7I9C4_MEDTR	3e-85	99.56	AT5G03790.1 | Symbols: ATHB51, LMI1, HB51 | homeobox 51 | chr5:1004985-1006373 FORWARD LENGTH=235	4e-53	90.71	GO:0006355 GO:0009965 GO:0010434 GO:0010582 GO:0045893 GO:0048443 GO:0048510	regulation of transcription, DNA-dependent; "leaf morphogenesis"; "bract formation"; "floral meristem determinacy"; "positive regulation of transcription, DNA-dependent"; "stamen development"; "regulation of timing of transition from vegetative to reproductive phase"	GO:0000976 GO:0003677 GO:0003700 GO:0043565	transcription regulatory region sequence-specific DNA binding; "DNA binding"; "sequence-specific DNA binding transcription factor activity"; "sequence-specific DNA binding"	GO:0005634	nucleus	PF00046	Homeobox domain	PTHR24326 PTHR24326:SF227	FAMILY NOT NAMED; ""	KOG0484	Transcription_factor_PHOX2/ARIX,_contains_HOX_domain	NA	NA	NA	NA
Glyma10g07450	301	UniRef100_I1L962 Uncharacterized protein n=1 Tax=Glycine max RepID=I1L962_SOYBN	0	99.67	UniRef100_B9SRL8 ATPP2-A13, putative n=1 Tax=Ricinus communis RepID=B9SRL8_RICCO	8e-178	98.67	AT3G53000.1 | Symbols: AtPP2-A15, PP2-A15 | phloem protein 2-A15 | chr3:19654278-19655801 FORWARD LENGTH=300	1e-162	99.67	GO:0006499	N-terminal protein myristoylation	GO:0030246	carbohydrate binding	GO:0005634	nucleus	NA	NA	NA	NA	NA	NA	NA	NA	NA	NA
Glyma10g07460	458	UniRef100_I1L963 Uncharacterized protein n=1 Tax=Glycine max RepID=I1L963_SOYBN	0	99.78	UniRef100_A7UQU9 Homeodomain-like n=1 Tax=Medicago truncatula RepID=A7UQU9_MEDTR	4e-161	89.74	AT1G76870.1 | Symbols: | BEST Arabidopsis thaliana protein match is: sequence-specific DNA binding transcription factors (TAIR:AT1G21200.1); Has 406 Blast hits to 351 proteins in 76 species: Archae - 0; Bacteria - 2; Metazoa - 137; Fungi - 14; Plants - 127; Viruses - 0; Other Eukaryotes - 126 (source: NCBI BLink). | chr1:28857250-28858407 FORWARD LENGTH=385	1e-39	40.17	GO:0008150	biological process	GO:0003674	molecular function	GO:0005634	nucleus	NA	NA	NA	NA	NA	NA	NA	NA	NA	NA
Glyma10g07480	528	UniRef100_I1L964 Pyruvate kinase n=1 Tax=Glycine max RepID=I1L964_SOYBN	0	99.81	UniRef100_I1L964 Pyruvate kinase n=1 Tax=Glycine max RepID=I1L964_SOYBN	0	99.81	AT3G52990.1 | Symbols: | Pyruvate kinase family protein | chr3:19649046-19652237 FORWARD LENGTH=527	0	99.81	GO:0006096 GO:0046686	glycolysis; "response to cadmium ion"	GO:0000287 GO:0003824 GO:0004743 GO:0030955	magnesium ion binding; "catalytic activity"; "pyruvate kinase activity"; "potassium ion binding"	GO:0005737 GO:0005829 GO:0016020	cytoplasm; "cytosol"; "membrane"	PF00224 PF02887	Pyruvate kinase, barrel domain; "Pyruvate kinase, alpha/beta domain"	PTHR11817	PYRUVATE KINASE	KOG2323	Pyruvate_kinase	2.7.1.40	Pyruvate_kinase	K00873	pyruvate_kinase_[EC:2.7.1.40]
Glyma10g07490	498	UniRef100_I1L966 Uncharacterized protein n=1 Tax=Glycine max RepID=I1L966_SOYBN	0	99.8	UniRef100_A7UQU8 Homeodomain-like; Uridylate kinase n=1 Tax=Medicago truncatula RepID=A7UQU8_MEDTR	0	99.8	AT3G10030.1 | Symbols: | aspartate/glutamate/uridylate kinase family protein | chr3:3092277-3094831 REVERSE LENGTH=542	0	99.2	GO:0000956 GO:0008652 GO:0048573	nuclear-transcribed mRNA catabolic process; "cellular amino acid biosynthetic process"; "photoperiodism, flowering"	GO:0003677	DNA binding	GO:0005737	cytoplasm	PF10545 PF00696	Alcohol dehydrogenase transcription factor Myb/SANT-like; "Amino acid kinase family"	PTHR26059 PTHR26059:SF1	FAMILY NOT NAMED; "SUBFAMILY NOT NAMED"	KOG1154	Gamma-glutamyl_kinase	NA	NA	NA	NA
Glyma10g07500	736	UniRef100_I1L967 Uncharacterized protein n=1 Tax=Glycine max RepID=I1L967_SOYBN	0	94.57	UniRef100_Q1SN29 Protein kinase n=1 Tax=Medicago truncatula RepID=Q1SN29_MEDTR	0	92.53	AT2G36570.1 | Symbols: | Leucine-rich repeat protein kinase family protein | chr2:15335583-15337725 FORWARD LENGTH=672	0	89.95	GO:0006468 GO:0007169	protein phosphorylation; "transmembrane receptor protein tyrosine kinase signaling pathway"	GO:0004672 GO:0004674 GO:0005524 GO:0016301 GO:0016772	protein kinase activity; "protein serine/threonine kinase activity"; "ATP binding"; "kinase activity"; "transferase activity, transferring phosphorus-containing groups"	GO:0005886	plasma membrane	PF00069 PF00560	Protein kinase domain; "Leucine Rich Repeat"	PTHR24420 PTHR24420:SF922	FAMILY NOT NAMED; ""	KOG1187	Serine/threonine_protein_kinase	NA	NA	NA	NA
Glyma10g07520	450	UniRef100_UPI000233CAA7 UPI000233CAA7 related cluster n=1 Tax=unknown RepID=UPI000233CAA7	0	99.78	UniRef100_G7I9B4 3-deoxy-D-manno-octulosonic-acid transferase n=1 Tax=Medicago truncatula RepID=G7I9B4_MEDTR	0	98	AT5G03770.1 | Symbols: KDTA | KDO transferase A | chr5:995191-997622 FORWARD LENGTH=447	0	96.67	GO:0009058 GO:0019243 GO:0048573	biosynthetic process; "methylglyoxal catabolic process to D-lactate"; "photoperiodism, flowering"	GO:0016757	transferase activity, transferring glycosyl groups	GO:0005886	plasma membrane	PF04413	3-Deoxy-D-manno-octulosonic-acid transferase (kdotransferase)	PTHR23417 PTHR23417:SF2	3-DEOXY-D-MANNO-OCTULOSONIC-ACID TRANSFERASE/TRNA (GUANINE-N(7)-)-METHYLTRANSFERASE; "3-DEOXY-D-MANNO-OCTULOSONIC-ACID TRANSFERASE (KDO TRANSFERASE)"	NA	NA	2.-.-.-	Transferases	K02527	3-deoxy-D-manno-octulosonic-acid_transferase_[EC:2.-.-.-]
Glyma10g07530	565	UniRef100_UPI000233CE07 UPI000233CE07 related cluster n=1 Tax=unknown RepID=UPI000233CE07	0	98.94	UniRef100_Q9LZ71 AT5g04550/T32M21_140 n=1 Tax=Arabidopsis thaliana RepID=Q9LZ71_ARATH	5e-108	96.28	AT5G04550.1 | Symbols: | Protein of unknown function (DUF668) | chr5:1303757-1305556 REVERSE LENGTH=599	1e-110	96.28	GO:0008150 GO:0042744	biological process; "hydrogen peroxide catabolic process"	GO:0003674	molecular function	GO:0005634	nucleus	PF11961 PF05003	Domain of unknown function (DUF3475); "Protein of unknown function (DUF668)"	NA	NA	NA	NA	NA	NA	NA	NA
Glyma10g07545	397	UniRef100_UPI000233CC1D UPI000233CC1D related cluster n=1 Tax=unknown RepID=UPI000233CC1D	0	99.75	UniRef100_B9SRF6 DNA binding protein, putative n=1 Tax=Ricinus communis RepID=B9SRF6_RICCO	5e-104	94.96	AT4G12080.1 | Symbols: AHL1, ATAHL1 | AT-hook motif nuclear-localized protein 1 | chr4:7239466-7241246 FORWARD LENGTH=356	4e-67	67.51	GO:0016132	brassinosteroid biosynthetic process	GO:0003677	DNA binding	GO:0005634 GO:0005730 GO:0005737 GO:0005739	nucleus; "nucleolus"; "cytoplasm"; "mitochondrion"	PF03479 PF02178	Domain of unknown function (DUF296); "AT hook motif"	NA	NA	NA	NA	NA	NA	NA	NA
Glyma10g07560	512	UniRef100_I1L972 Uncharacterized protein n=1 Tax=Glycine max RepID=I1L972_SOYBN	0	99.8	UniRef100_E4MX95 mRNA, clone: RTFL01-17-G12 n=1 Tax=Eutrema halophilum RepID=E4MX95_THEHA	0	99.61	AT5G03760.1 | Symbols: ATCSLA09, CSLA09, ATCSLA9, CSLA9, RAT4 | Nucleotide-diphospho-sugar transferases superfamily protein | chr5:985910-990087 REVERSE LENGTH=533	0	99.41	GO:0006816 GO:0007030 GO:0009294 GO:0009617 GO:0009651 GO:0009736 GO:0042546	calcium ion transport; "Golgi organization"; "DNA mediated transformation"; "response to bacterium"; "response to salt stress"; "cytokinin mediated signaling pathway"; "cell wall biogenesis"	GO:0016757 GO:0051753	transferase activity, transferring glycosyl groups; "mannan synthase activity"	GO:0005794	Golgi apparatus	PF00535	Glycosyl transferase family 2	PTHR10587 PTHR10587:SF34	N-ACETYLGLUCOSAMINYLTRANSFERASE-RELATED; "MANNAN SYNTHASE"	NA	NA	NA	NA	NA	NA
Glyma10g07580	130	UniRef100_I1L973 Uncharacterized protein n=1 Tax=Glycine max RepID=I1L973_SOYBN	1e-87	99.23	UniRef100_B9SRG4 C-14 sterol reductase, putative n=1 Tax=Ricinus communis RepID=B9SRG4_RICCO	1e-74	98.46	AT3G52940.1 | Symbols: FK, HYD2, ELL1 | Ergosterol biosynthesis ERG4/ERG24 family | chr3:19630369-19633112 REVERSE LENGTH=369	4e-75	98.46	GO:0006084 GO:0009793 GO:0016126 GO:0016132 GO:0019745 GO:0055114	acetyl-CoA metabolic process; "embryo development ending in seed dormancy"; "sterol biosynthetic process"; "brassinosteroid biosynthetic process"; "pentacyclic triterpenoid biosynthetic process"; "oxidation-reduction process"	GO:0016628 GO:0050613	oxidoreductase activity, acting on the CH-CH group of donors, NAD or NADP as acceptor; "delta14-sterol reductase activity"	GO:0005634 GO:0016020	nucleus; "membrane"	PF01222	Ergosterol biosynthesis ERG4/ERG24 family	PTHR21257 PTHR21257:SF21	STEROL REDUCTASE-RELATED; "SUBFAMILY NOT NAMED"	NA	NA	NA	NA	NA	NA
Glyma10g07590	537	UniRef100_UPI000233CC21 UPI000233CC21 related cluster n=1 Tax=unknown RepID=UPI000233CC21	0	99.81	UniRef100_G7L1S8 Folylpolyglutamate synthase n=1 Tax=Medicago truncatula RepID=G7L1S8_MEDTR	0	79.33	AT5G41480.1 | Symbols: EMB9, GLA1, ATDFA, DFA | Folylpolyglutamate synthetase family protein | chr5:16595967-16598523 FORWARD LENGTH=530	0	94.97	GO:0006730 GO:0009058 GO:0009396 GO:0009793	one-carbon metabolic process; "biosynthetic process"; "folic acid-containing compound biosynthetic process"; "embryo development ending in seed dormancy"	GO:0004326 GO:0005524 GO:0008841 GO:0016874	tetrahydrofolylpolyglutamate synthase activity; "ATP binding"; "dihydrofolate synthase activity"; "ligase activity"	GO:0005759	mitochondrial matrix	PF08245	Mur ligase middle domain	PTHR11136	FOLYLPOLYGLUTAMATE SYNTHASE-RELATED	KOG2525	Folylpolyglutamate_synthase	6.3.2.17	Folylpolyglutamate_synthase	K01930	folylpolyglutamate_synthase_[EC:6.3.2.17]
Glyma10g07601	2015	UniRef100_UPI000233CE09 UPI000233CE09 related cluster n=1 Tax=unknown RepID=UPI000233CE09	0	81.39	UniRef100_F6KFZ2 Repressor of gene silencing 1 n=1 Tax=Gossypium hirsutum RepID=F6KFZ2_GOSHI	0	62.53	AT2G36490.1 | Symbols: DML1, ROS1 | demeter-like 1 | chr2:15308259-15314272 REVERSE LENGTH=1393	0	51.76	GO:0006281 GO:0006284 GO:0006306 GO:0006342 GO:0031936 GO:0080111	DNA repair; "base-excision repair"; "DNA methylation"; "chromatin silencing"; "negative regulation of chromatin silencing"; "DNA demethylation"	GO:0003906 GO:0005515 GO:0019104	DNA-(apurinic or apyrimidinic site) lyase activity; "protein binding"; "DNA N-glycosylase activity"	GO:0005634	nucleus	PF00730	HhH-GPD superfamily base excision DNA repair protein	PTHR10359 PTHR10359:SF3	A/G-SPECIFIC ADENINE GLYCOSYLASE/ENDONUCLEASE III; "A/G-SPECIFIC ADENINE GLYCOSYLASE"	NA	NA	NA	NA	NA	NA
Glyma10g07610	837	UniRef100_UPI000233CC26 UPI000233CC26 related cluster n=1 Tax=unknown RepID=UPI000233CC26	0	99.76	UniRef100_B9SRG7 Map3k delta-1 protein kinase, putative n=1 Tax=Ricinus communis RepID=B9SRG7_RICCO	0	99.52	AT5G03730.1 | Symbols: CTR1, SIS1, AtCTR1 | Protein kinase superfamily protein | chr5:974958-979660 REVERSE LENGTH=821	0	98.69	GO:0006468 GO:0009686 GO:0009723 GO:0009744 GO:0009750 GO:0010105 GO:0010182 GO:0046777 GO:0048510 GO:0071281 GO:2000035 GO:2000069	protein phosphorylation; "gibberellin biosynthetic process"; "response to ethylene stimulus"; "response to sucrose stimulus"; "response to fructose stimulus"; "negative regulation of ethylene mediated signaling pathway"; "sugar mediated signaling pathway"; "protein autophosphorylation"; "regulation of timing of transition from vegetative to reproductive phase"; "cellular response to iron ion"; "r…	GO:0004672 GO:0004674 GO:0004712 GO:0004713 GO:0005515 GO:0005524 GO:0016301 GO:0016772	protein kinase activity; "protein serine/threonine kinase activity"; "protein serine/threonine/tyrosine kinase activity"; "protein tyrosine kinase activity"; "protein binding"; "ATP binding"; "kinase activity"; "transferase activity, transferring phosphorus-containing groups"	GO:0005634 GO:0005789	nucleus; "endoplasmic reticulum membrane"	PF07714	Protein tyrosine kinase	PTHR23257 PTHR23257:SF80	SERINE-THREONINE PROTEIN KINASE; "MAP3K DELTA-1 PROTEIN KINASE"	KOG0192	Tyrosine_kinase_specific_for_activated_(GTP-bound)_p21cdc42Hs	2.7.11.1	non-specific_serine/threonine_protein_kinase	K14510	serine/threonine-protein_kinase_CTR1_[EC:2.7.11.1]
Glyma10g07620	461	UniRef100_UPI000233CF71 UPI000233CF71 related cluster n=1 Tax=unknown RepID=UPI000233CF71	0	99.78	UniRef100_B9SRG8 DNA binding protein, putative n=1 Tax=Ricinus communis RepID=B9SRG8_RICCO	3e-138	97.18	AT5G03720.1 | Symbols: AT-HSFA3, HSFA3 | heat shock transcription factor A3 | chr5:971913-973683 REVERSE LENGTH=412	2e-97	92.62	GO:0006355 GO:0009408 GO:0010200	regulation of transcription, DNA-dependent; "response to heat"; "response to chitin"	GO:0003677 GO:0003700 GO:0043565	DNA binding; "sequence-specific DNA binding transcription factor activity"; "sequence-specific DNA binding"	GO:0005634	nucleus	PF00447	HSF-type DNA-binding	PTHR10015 PTHR10015:SF7	HEAT SHOCK TRANSCRIPTION FACTOR; "HEAT SHOCK TRANSCRIPTION FACTOR"	KOG0627	Heat_shock_transcription_factor	NA	NA	NA	NA
[truncated: 289 more rows]

## Sheet: Table S4
Supplementary Table S4: Predicted candidate genes within qPro-7-1, qOil-8-3, qOil-10-2 and qOil-10-4 regions
[truncated: 123 more rows]

## Sheet: Table S5
Supplementary Table S5: Candidate genes within qPro-7-1, qOil-8-3, qOil-10-2 and qOil-10-4 regions and their relative expression data retrived from RNA-seq data available in soybase. (DAF= Days after flowering)
[truncated: 100 more rows]

[truncated: 1 more sheets: Table S6]
